# Supplementary material for: Diatom Cell Size, Coloniality and Motility: Trade-Offs between Temperature, Salinity and Nutrient Supply with Climate Change
Source: PubMed Central journal article supplement (PMC4184900; doi:10.1371/journal.pone.0109993), 2014-10-03
Supplement: pone.0109993.s001.pdf [file pone.0109993.s001.pdf]

Table S1. Dataset “Temperature” with 121 site/dates: Environmental and biotic variables. Abbreviations cf. Figure 5.

| SITE | DATE   | °C<br>TEMP | °C<br>TEMP G | °C<br>ANOM | µmol/m <sup>2</sup> s<br>PAR | µmol/L<br>DIN | µmol/L<br>DIP | µmol/L<br>DSi | mol/mol<br>N:P | 1-6 cale<br>FLOW | of 1000<br>RICHN | g/m <sup>2</sup><br>MPB | 1-9 scale<br>MACCOV | Indiv/m <sup>2</sup><br>FAUNA |
|------|--------|------------|--------------|------------|------------------------------|---------------|---------------|---------------|----------------|------------------|------------------|-------------------------|---------------------|-------------------------------|
| A    | 840502 | 16.5       | 7.5          | 5.0        | 455                          | 0.14          | 0.06          | 6.00          | 2.21           | 5                | 47               | 43                      | 3.5                 | 620                           |
| A    | 840523 | 16.1       | 11.8         | 5.0        | 474                          | 1.00          | 0.09          | 4.00          | 11.07          | 5                | 53               | 43                      | 3.3                 | 3277                          |
| A    | 840612 | 17.5       | 13.9         | 5.0        | 499                          | 0.14          | 0.05          | 7.14          | 3.16           | 5                | 57               | 8                       | 5.0                 | 12128                         |
| A    | 840703 | 18.2       | 15.4         | 5.0        | 523                          | 0.21          | 0.05          | 7.29          | 4.15           | 5                | 73               | 7                       | 1.5                 | 497                           |
| A    | 840724 | 16.1       | 16.2         | 5.0        | 477                          | 0.36          | 0.13          | 8.43          | 2.77           | 5                | 73               | 15                      | 5.0                 | 1210                          |
| A    | 840814 | 24.4       | 17.6         | 5.0        | 432                          | 1.36          | 0.10          | 10.21         | 14.02          | 5                | 69               | 36                      | 8.0                 | 20318                         |
| A    | 840906 | 22.4       | 14.5         | 5.0        | 222                          | 0.50          | 0.09          | 8.43          | 5.74           | 5                | 68               | 30                      | 8.3                 | 7142                          |
| A    | 840926 | 22.6       | 12.7         | 5.0        | 70                           | 1.21          | 0.17          | 9.07          | 6.97           | 5                | 75               | 16                      | 3.8                 | 1733                          |
| A    | 841016 | 14.9       | 9.9          | 5.0        | 117                          | 1.71          | 0.09          | 8.50          | 18.98          | 5                | 58               | 31                      | 9.0                 | 8511                          |
| A    | 841106 | 10.4       | 8.1          | 5.0        | 82                           | 3.86          | 0.24          | 19.43         | 16.16          | 5                | 55               | 15                      | 3.0                 | 28                            |
| A    | 841127 | 9.0        | 5.7          | 5.0        | 47                           | 6.43          | 0.19          | 22.64         | 33.21          | 5                | 60               | 12                      | 6.0                 | 5549                          |
| B    | 840502 | 11.4       | 7.5          | 2.1        | 455                          | 0.14          | 0.06          | 6.00          | 2.21           | 3                | 50               | 8                       | 1.0                 | 485                           |
| B    | 840523 | 14.3       | 11.8         | 2.1        | 474                          | 1.00          | 0.09          | 4.00          | 11.07          | 3                | 44               | 10                      | 0.5                 | 478                           |
| B    | 840612 | 15.7       | 13.9         | 2.1        | 499                          | 0.14          | 0.05          | 7.14          | 3.16           | 3                | 52               | 5                       | 1.0                 | 1325                          |
| B    | 840703 | 17.7       | 15.4         | 2.1        | 523                          | 0.21          | 0.05          | 7.29          | 4.15           | 3                | 62               | 6                       | 0.7                 | 879                           |
| B    | 840724 | 18.5       | 16.2         | 2.1        | 477                          | 0.36          | 0.13          | 8.43          | 2.77           | 3                | 58               | 3                       | 0.3                 | 332                           |
| B    | 840814 | 21.9       | 17.6         | 2.1        | 432                          | 1.36          | 0.10          | 10.21         | 14.02          | 3                | 58               | 13                      | 1.7                 | 1955                          |
| B    | 840906 | 18.9       | 14.5         | 2.1        | 222                          | 0.50          | 0.09          | 8.43          | 5.74           | 3                | 68               | 10                      | 2.3                 | 1644                          |
| B    | 840926 | 13.8       | 12.7         | 2.1        | 70                           | 1.21          | 0.17          | 9.07          | 6.97           | 3                | 65               | 10                      | 0.8                 | 252                           |
| B    | 841016 | 13.8       | 9.9          | 2.1        | 117                          | 1.71          | 0.09          | 8.50          | 18.98          | 3                | 66               | 9                       | 0.3                 | 36                            |
| B    | 841106 | 6.8        | 8.1          | 2.1        | 82                           | 3.86          | 0.24          | 19.43         | 16.16          | 3                | 57               | 14                      | 1.0                 | 112                           |
| B    | 841127 | 3.8        | 5.7          | 2.1        | 47                           | 6.43          | 0.19          | 22.64         | 33.21          | 3                | 56               | 15                      | 6.5                 | 2212                          |
| C    | 840502 | 14.7       | 7.5          | 7.4        | 455                          | 0.14          | 0.06          | 6.00          | 2.21           | 4                | 56               | 23                      | 2.3                 | 1157                          |
| C    | 840523 | 19.1       | 11.8         | 7.4        | 474                          | 1.00          | 0.09          | 4.00          | 11.07          | 4                | 56               | 23                      | 3.8                 | 4278                          |
| C    | 840612 | 20.4       | 13.9         | 7.4        | 499                          | 0.14          | 0.05          | 7.14          | 3.16           | 4                | 69               | 5                       | 5.5                 | 1070                          |
| C    | 840703 | 21.8       | 15.4         | 7.4        | 523                          | 0.21          | 0.05          | 7.29          | 4.15           | 4                | 62               | 13                      | 1.8                 | 802                           |
| C    | 840724 | 23.0       | 16.2         | 7.4        | 477                          | 0.36          | 0.13          | 8.43          | 2.77           | 4                | 61               | 11                      | 5.5                 | 2051                          |
| C    | 840814 | 25.6       | 17.6         | 7.4        | 432                          | 1.36          | 0.10          | 10.21         | 14.02          | 4                | 62               | 18                      | 7.5                 | 7852                          |
| C    | 840906 | 23.1       | 14.5         | 7.4        | 222                          | 0.50          | 0.09          | 8.43          | 5.74           | 4                | 62               | 18                      | 0.8                 | 258                           |
| C    | 840926 | 20.2       | 12.7         | 7.4        | 70                           | 1.21          | 0.17          | 9.07          | 6.97           | 4                | 60               | 27                      | 1.3                 | 603                           |
| C    | 841016 | 17.5       | 9.9          | 7.4        | 117                          | 1.71          | 0.09          | 8.50          | 18.98          | 4                | 52               | 29                      | 2.8                 | 349                           |
| C    | 841106 | 15.2       | 8.1          | 7.4        | 82                           | 3.86          | 0.24          | 19.43         | 16.16          | 4                | 54               | 11                      | 0.8                 | 50                            |
| C    | 841127 | 14.0       | 5.7          | 7.4        | 47                           | 6.43          | 0.19          | 22.64         | 33.21          | 4                | 57               | 23                      | 5.8                 | 4920                          |
| D    | 840502 | 8.9        | 7.5          | 0.9        | 455                          | 0.14          | 0.06          | 6.00          | 2.21           | 2                | 50               | 42                      | 7.0                 | 3224                          |
| D    | 840523 | 15.5       | 11.8         | 0.9        | 474                          | 1.00          | 0.09          | 4.00          | 11.07          | 2                | 59               | 30                      | 3.6                 | 1557                          |
| D    | 840612 | 14.8       | 13.9         | 0.9        | 499                          | 0.14          | 0.05          | 7.14          | 3.16           | 2                | 68               | 32                      | 0.3                 | 1111                          |
| D    | 840703 | 16.3       | 15.4         | 0.9        | 523                          | 0.21          | 0.05          | 7.29          | 4.15           | 2                | 75               | 6                       | 0.3                 | 459                           |
| D    | 840724 | 17.1       | 16.2         | 0.9        | 477                          | 0.36          | 0.13          | 8.43          | 2.77           | 2                | 69               | 9                       | 0.3                 | 746                           |
| D    | 840814 | 19.7       | 17.6         | 0.9        | 432                          | 1.36          | 0.10          | 10.21         | 14.02          | 2                | 60               | 16                      | 6.5                 | 11585                         |

|   |        |      |      |     |     |      |      |       |       |   |    |    |     |       |
|---|--------|------|------|-----|-----|------|------|-------|-------|---|----|----|-----|-------|
| D | 840906 | 14.6 | 14.5 | 0.9 | 222 | 0.50 | 0.09 | 8.43  | 5.74  | 2 | 54 | 14 | 1.0 | 405   |
| D | 840926 | 13.0 | 12.7 | 0.9 | 70  | 1.21 | 0.17 | 9.07  | 6.97  | 2 | 62 | 11 | 1.0 | 484   |
| D | 841016 | 9.6  | 9.9  | 0.9 | 117 | 1.71 | 0.09 | 8.50  | 18.98 | 2 | 54 | 26 | 2.0 | 483   |
| D | 841106 | 8.1  | 8.1  | 0.9 | 82  | 3.86 | 0.24 | 19.43 | 16.16 | 2 | 63 | 22 | 1.5 | 1070  |
| D | 841127 | 5.5  | 5.7  | 0.9 | 47  | 6.43 | 0.19 | 22.64 | 33.21 | 2 | 59 | 17 | 3.8 | 179   |
| E | 840502 | 13.3 | 7.5  | 6.9 | 455 | 0.14 | 0.06 | 6.00  | 2.21  | 6 | 58 | 26 | 1.5 | 2586  |
| E | 840523 | 19.2 | 11.8 | 6.9 | 474 | 1.00 | 0.09 | 4.00  | 11.07 | 6 | 60 | 9  | 2.5 | 3690  |
| E | 840612 | 20.5 | 13.9 | 6.9 | 499 | 0.14 | 0.05 | 7.14  | 3.16  | 6 | 67 | 14 | 2.5 | 4653  |
| E | 840703 | 21.3 | 15.4 | 6.9 | 523 | 0.21 | 0.05 | 7.29  | 4.15  | 6 | 71 | 17 | 1.8 | 852   |
| E | 840724 | 22.0 | 16.2 | 6.9 | 477 | 0.36 | 0.13 | 8.43  | 2.77  | 6 | 60 | 11 | 2.0 | 327   |
| E | 840814 | 25.4 | 17.6 | 6.9 | 432 | 1.36 | 0.10 | 10.21 | 14.02 | 6 | 67 | 26 | 7.8 | 13367 |
| E | 840906 | 22.3 | 14.5 | 6.9 | 222 | 0.50 | 0.09 | 8.43  | 5.74  | 6 | 53 | 20 | 2.0 | 1809  |
| E | 840926 | 20.5 | 12.7 | 6.9 | 70  | 1.21 | 0.17 | 9.07  | 6.97  | 6 | 67 | 28 | 2.0 | 1105  |
| E | 841016 | 16.6 | 9.9  | 6.9 | 117 | 1.71 | 0.09 | 8.50  | 18.98 | 6 | 57 | 28 | 3.8 | 539   |
| E | 841106 | 13.7 | 8.1  | 6.9 | 82  | 3.86 | 0.24 | 19.43 | 16.16 | 6 | 59 | 19 | 1.0 | 344   |
| E | 841127 | 13.9 | 5.7  | 6.9 | 47  | 6.43 | 0.19 | 22.64 | 33.21 | 6 | 54 | 29 | 7.0 | 6240  |
| F | 840502 | 15.2 | 7.5  | 8.5 | 455 | 0.14 | 0.06 | 6.00  | 2.21  | 6 | 49 | 32 | 0.3 | 600   |
| F | 840523 | 19.5 | 11.8 | 8.5 | 474 | 1.00 | 0.09 | 4.00  | 11.07 | 6 | 74 | 19 | 0.3 | 1828  |
| F | 840612 | 21.2 | 13.9 | 8.5 | 499 | 0.14 | 0.05 | 7.14  | 3.16  | 6 | 70 | 13 | 0.8 | 12039 |
| F | 840703 | 21.7 | 15.4 | 8.5 | 523 | 0.21 | 0.05 | 7.29  | 4.15  | 6 | 73 | 11 | 0.8 | 261   |
| F | 840724 | 25.2 | 16.2 | 8.5 | 477 | 0.36 | 0.13 | 8.43  | 2.77  | 6 | 57 | 7  | 0.8 | 188   |
| F | 840814 | 25.4 | 17.6 | 8.5 | 432 | 1.36 | 0.10 | 10.21 | 14.02 | 6 | 73 | 23 | 6.5 | 16395 |
| F | 840906 | 24.2 | 14.5 | 8.5 | 222 | 0.50 | 0.09 | 8.43  | 5.74  | 6 | 73 | 9  | 1.0 | 115   |
| F | 840926 | 22.5 | 12.7 | 8.5 | 70  | 1.21 | 0.17 | 9.07  | 6.97  | 6 | 65 | 13 | 2.5 | 283   |
| F | 841016 | 19.5 | 9.9  | 8.5 | 117 | 1.71 | 0.09 | 8.50  | 18.98 | 6 | 56 | 15 | 6.3 | 1475  |
| F | 841106 | 16.6 | 8.1  | 8.5 | 82  | 3.86 | 0.24 | 19.43 | 16.16 | 6 | 73 | 8  | 1.0 | 49    |
| F | 841127 | 15.6 | 5.7  | 8.5 | 47  | 6.43 | 0.19 | 22.64 | 33.21 | 6 | 45 | 13 | 6.3 | 4656  |
| G | 840502 | 7.5  | 7.5  | 0.0 | 455 | 0.14 | 0.06 | 6.00  | 2.21  | 5 | 43 | 21 | 1.8 | 504   |
| G | 840523 | 11.8 | 11.8 | 0.0 | 474 | 1.00 | 0.09 | 4.00  | 11.07 | 5 | 59 | 22 | 0.5 | 583   |
| G | 840612 | 13.9 | 13.9 | 0.0 | 499 | 0.14 | 0.05 | 7.14  | 3.16  | 5 | 69 | 20 | 0.3 | 773   |
| G | 840703 | 15.4 | 15.4 | 0.0 | 523 | 0.21 | 0.05 | 7.29  | 4.15  | 5 | 70 | 14 | 1.0 | 152   |
| G | 840724 | 16.2 | 16.2 | 0.0 | 477 | 0.36 | 0.13 | 8.43  | 2.77  | 5 | 81 | 14 | 0.3 | 266   |
| G | 840814 | 17.6 | 17.6 | 0.0 | 432 | 1.36 | 0.10 | 10.21 | 14.02 | 5 | 74 | 19 | 1.5 | 1340  |
| G | 840906 | 14.5 | 14.5 | 0.0 | 222 | 0.50 | 0.09 | 8.43  | 5.74  | 5 | 81 | 27 | 1.0 | 1389  |
| G | 840926 | 12.7 | 12.7 | 0.0 | 70  | 1.21 | 0.17 | 9.07  | 6.97  | 5 | 75 | 19 | 1.0 | 227   |
| G | 841016 | 9.9  | 9.9  | 0.0 | 117 | 1.71 | 0.09 | 8.50  | 18.98 | 5 | 61 | 20 | 1.0 | 321   |
| G | 841106 | 8.1  | 8.1  | 0.0 | 82  | 3.86 | 0.24 | 19.43 | 16.16 | 5 | 55 | 14 | 1.0 | 212   |
| G | 841127 | 5.7  | 5.7  | 0.0 | 47  | 6.43 | 0.19 | 22.64 | 33.21 | 5 | 72 | 22 | 3.5 | 1180  |
| H | 840502 | 9.5  | 7.5  | 0.7 | 455 | 0.14 | 0.06 | 6.00  | 2.21  | 2 | 46 | 19 | 3.0 | 939   |
| H | 840523 | 15.2 | 11.8 | 0.7 | 474 | 1.00 | 0.09 | 4.00  | 11.07 | 2 | 48 | 4  | 3.3 | 1205  |
| H | 840612 | 14.1 | 13.9 | 0.7 | 499 | 0.14 | 0.05 | 7.14  | 3.16  | 2 | 31 | 7  | 5.7 | 1581  |
| H | 840703 | 16.3 | 15.4 | 0.7 | 523 | 0.21 | 0.05 | 7.29  | 4.15  | 2 | 62 | 9  | 1.0 | 2010  |
| H | 840724 | 16.3 | 16.2 | 0.7 | 477 | 0.36 | 0.13 | 8.43  | 2.77  | 2 | 57 | 10 | 5.7 | 6273  |
| H | 840814 | 19.3 | 17.6 | 0.7 | 432 | 1.36 | 0.10 | 10.21 | 14.02 | 2 | 36 | 14 | 9.0 | 31280 |
| H | 840906 | 15.6 | 14.5 | 0.7 | 222 | 0.50 | 0.09 | 8.43  | 5.74  | 2 | 42 | 7  | 1.0 | 268   |
| H | 840926 | 13.0 | 12.7 | 0.7 | 70  | 1.21 | 0.17 | 9.07  | 6.97  | 2 | 61 | 10 | 1.8 | 564   |

|   |        |      |      |     |     |      |      |       |       |   |    |    |     |       |
|---|--------|------|------|-----|-----|------|------|-------|-------|---|----|----|-----|-------|
| H | 841016 | 10.0 | 9.9  | 0.7 | 117 | 1.71 | 0.09 | 8.50  | 18.98 | 2 | 52 | 15 | 3.0 | 176   |
| H | 841106 | 7.2  | 8.1  | 0.7 | 82  | 3.86 | 0.24 | 19.43 | 16.16 | 2 | 55 | 16 | 2.3 | 226   |
| H | 841127 | 4.6  | 5.7  | 0.7 | 47  | 6.43 | 0.19 | 22.64 | 33.21 | 2 | 53 | 11 | 4.3 | 681   |
| I | 840502 | 13.7 | 7.5  | 4.7 | 455 | 0.14 | 0.06 | 6.00  | 2.21  | 1 | 65 | 36 | 4.3 | 1966  |
| I | 840523 | 19.1 | 11.8 | 4.7 | 474 | 1.00 | 0.09 | 4.00  | 11.07 | 1 | 62 | 11 | 1.0 | 1613  |
| I | 840612 | 19.1 | 13.9 | 4.7 | 499 | 0.14 | 0.05 | 7.14  | 3.16  | 1 | 63 | 11 | 2.3 | 6738  |
| I | 840703 | 18.9 | 15.4 | 4.7 | 523 | 0.21 | 0.05 | 7.29  | 4.15  | 1 | 66 | 12 | 0.3 | 171   |
| I | 840724 | 19.4 | 16.2 | 4.7 | 477 | 0.36 | 0.13 | 8.43  | 2.77  | 1 | 66 | 25 | 1.5 | 479   |
| I | 840814 | 22.7 | 17.6 | 4.7 | 432 | 1.36 | 0.10 | 10.21 | 14.02 | 1 | 66 | 32 | 2.0 | 1152  |
| I | 840906 | 20.3 | 14.5 | 4.7 | 222 | 0.50 | 0.09 | 8.43  | 5.74  | 1 | 68 | 22 | 1.0 | 1117  |
| I | 840926 | 16.1 | 12.7 | 4.7 | 70  | 1.21 | 0.17 | 9.07  | 6.97  | 1 | 80 | 12 | 1.0 | 1143  |
| I | 841016 | 15.6 | 9.9  | 4.7 | 117 | 1.71 | 0.09 | 8.50  | 18.98 | 1 | 70 | 16 | 1.0 | 943   |
| I | 841106 | 11.6 | 8.1  | 4.7 | 82  | 3.86 | 0.24 | 19.43 | 16.16 | 1 | 59 | 11 | 0.5 | 142   |
| I | 841127 | 8.7  | 5.7  | 4.7 | 47  | 6.43 | 0.19 | 22.64 | 33.21 | 1 | 68 | 11 | 0.3 | 16    |
| J | 840502 | 12.2 | 7.5  | 1.3 | 455 | 0.14 | 0.06 | 6.00  | 2.21  | 1 | 46 | 26 | 4.0 | 2336  |
| J | 840523 | 19.3 | 11.8 | 1.3 | 474 | 1.00 | 0.09 | 4.00  | 11.07 | 1 | 49 | 31 | 9.0 | 15208 |
| J | 840612 | 16.8 | 13.9 | 1.3 | 499 | 0.14 | 0.05 | 7.14  | 3.16  | 1 | 52 | 13 | 1.8 | 196   |
| J | 840703 | 17.6 | 15.4 | 1.3 | 523 | 0.21 | 0.05 | 7.29  | 4.15  | 1 | 60 | 18 | 0.3 | 391   |
| J | 840724 | 18.9 | 16.2 | 1.3 | 477 | 0.36 | 0.13 | 8.43  | 2.77  | 1 | 64 | 9  | 1.8 | 1806  |
| J | 840814 | 18.4 | 17.6 | 1.3 | 432 | 1.36 | 0.10 | 10.21 | 14.02 | 1 | 52 | 16 | 3.0 | 5039  |
| J | 840906 | 15.5 | 14.5 | 1.3 | 222 | 0.50 | 0.09 | 8.43  | 5.74  | 1 | 61 | 10 | 0.7 | 1193  |
| J | 840926 | 12.0 | 12.7 | 1.3 | 70  | 1.21 | 0.17 | 9.07  | 6.97  | 1 | 53 | 9  | 0.3 | 603   |
| J | 841016 | 8.1  | 9.9  | 1.3 | 117 | 1.71 | 0.09 | 8.50  | 18.98 | 1 | 63 | 11 | 0.8 | 869   |
| J | 841106 | 6.2  | 8.1  | 1.3 | 82  | 3.86 | 0.24 | 19.43 | 16.16 | 1 | 46 | 10 | 1.0 | 1833  |
| J | 841127 | 2.2  | 5.7  | 1.3 | 47  | 6.43 | 0.19 | 22.64 | 33.21 | 1 | 64 | 10 | 1.0 | 911   |
| K | 840502 | 13.7 | 7.5  | 5.7 | 455 | 0.14 | 0.06 | 6.00  | 2.21  | 2 | 50 | 14 | 0.3 | 637   |
| K | 840523 | 18.7 | 11.8 | 5.7 | 474 | 1.00 | 0.09 | 4.00  | 11.07 | 2 | 56 | 8  | 1.0 | 1333  |
| K | 840612 | 20.1 | 13.9 | 5.7 | 499 | 0.14 | 0.05 | 7.14  | 3.16  | 2 | 52 | 10 | 7.0 | 3403  |
| K | 840703 | 19.4 | 15.4 | 5.7 | 523 | 0.21 | 0.05 | 7.29  | 4.15  | 2 | 52 | 8  | 0.3 | 86    |
| K | 840724 | 21.0 | 16.2 | 5.7 | 477 | 0.36 | 0.13 | 8.43  | 2.77  | 2 | 51 | 16 | 7.0 | 4064  |
| K | 840814 | 24.9 | 17.6 | 5.7 | 432 | 1.36 | 0.10 | 10.21 | 14.02 | 2 | 49 | 24 | 5.5 | 7307  |
| K | 840906 | 20.8 | 14.5 | 5.7 | 222 | 0.50 | 0.09 | 8.43  | 5.74  | 2 | 52 | 13 | 0.8 | 1467  |
| K | 840926 | 18.9 | 12.7 | 5.7 | 70  | 1.21 | 0.17 | 9.07  | 6.97  | 2 | 55 | 14 | 3.3 | 2655  |
| K | 841016 | 14.8 | 9.9  | 5.7 | 117 | 1.71 | 0.09 | 8.50  | 18.98 | 2 | 48 | 20 | 4.6 | 1608  |
| K | 841106 | 12.3 | 8.1  | 5.7 | 82  | 3.86 | 0.24 | 19.43 | 16.16 | 2 | 55 | 10 | 1.0 | 171   |
| K | 841127 | 11.6 | 5.7  | 5.7 | 47  | 6.43 | 0.19 | 22.64 | 33.21 | 2 | 45 | 15 | 6.8 | 3984  |
