# Supplementary material for: Diatom Cell Size, Coloniality and Motility: Trade-Offs between Temperature, Salinity and Nutrient Supply with Climate Change
Source: PubMed Central journal article supplement (PMC4184900; doi:10.1371/journal.pone.0109993), 2014-10-03
Supplement: pone.0109993.s002.pdf [file pone.0109993.s002.pdf]

|          |   |    |    |    |    |    |    |    |     |    |     |     |
|----------|---|----|----|----|----|----|----|----|-----|----|-----|-----|
| Epi_sore | A | 0  | 3  | 0  | 3  | 1  | 33 | 24 | 1   | 3  | 2   | 2   |
| Epi_tuwe | A | 0  | 1  | 0  | 1  | 1  | 0  | 5  | 0   | 1  | 0   | 8   |
| Fal_cryp | A | 0  | 0  | 1  | 0  | 0  | 0  | 0  | 3   | 0  | 0   | 5   |
| Fal_pqli | A | 0  | 0  | 0  | 0  | 0  | 0  | 0  | 0   | 0  | 0   | 0   |
| Fal_pygm | A | 0  | 0  | 0  | 0  | 0  | 0  | 0  | 0   | 0  | 0   | 0   |
| Fra_amic | A | 3  | 2  | 16 | 18 | 23 | 13 | 14 | 14  | 7  | 16  | 3   |
| Fra_cava | A | 0  | 0  | 0  | 0  | 0  | 0  | 0  | 0   | 0  | 0   | 0   |
| Fra_cons | A | 0  | 0  | 0  | 0  | 4  | 3  | 2  | 0   | 0  | 3   | 3   |
| Fra_hydu | A | 0  | 0  | 0  | 0  | 0  | 0  | 0  | 0   | 0  | 0   | 0   |
| Fra_stri | A | 1  | 0  | 7  | 4  | 1  | 3  | 0  | 0   | 0  | 0   | 0   |
| Frp_cyli | A | 0  | 0  | 0  | 0  | 0  | 0  | 0  | 0   | 0  | 0   | 0   |
| Fru_creu | A | 0  | 0  | 0  | 0  | 0  | 0  | 0  | 0   | 0  | 0   | 0   |
| Gom_oliv | A | 54 | 2  | 3  | 5  | 0  | 2  | 14 | 13  | 0  | 0   | 2   |
| Gom_parv | A | 0  | 0  | 0  | 0  | 0  | 0  | 0  | 0   | 0  | 0   | 0   |
| Gon_exig | A | 0  | 0  | 0  | 0  | 0  | 2  | 0  | 0   | 0  | 0   | 0   |
| Gos_pseu | A | 9  | 0  | 6  | 2  | 4  | 0  | 0  | 0   | 4  | 0   | 2   |
| Gra_ocea | A | 0  | 0  | 0  | 2  | 0  | 0  | 0  | 0   | 0  | 0   | 0   |
| Gyr_exim | A | 0  | 0  | 0  | 0  | 0  | 0  | 0  | 0   | 0  | 0   | 0   |
| Gyr_fasc | A | 0  | 1  | 0  | 0  | 0  | 0  | 0  | 0   | 0  | 0   | 0   |
| Hal_acut | A | 0  | 2  | 5  | 2  | 4  | 0  | 2  | 0   | 0  | 1   | 0   |
| Hal_coff | A | 0  | 0  | 3  | 10 | 16 | 4  | 10 | 16  | 0  | 10  | 0   |
| Hal_exig | A | 0  | 0  | 0  | 0  | 1  | 1  | 0  | 0   | 0  | 0   | 0   |
| Hal_hols | A | 0  | 0  | 0  | 0  | 0  | 0  | 0  | 0   | 0  | 0   | 0   |
| Hal_hybr | A | 0  | 0  | 0  | 0  | 0  | 0  | 0  | 0   | 0  | 0   | 0   |
| Hal_luci | A | 0  | 0  | 0  | 0  | 0  | 0  | 0  | 0   | 0  | 0   | 0   |
| Hal_subh | A | 0  | 0  | 0  | 0  | 0  | 0  | 0  | 0   | 0  | 0   | 0   |
| Hal_tene | A | 1  | 0  | 3  | 2  | 2  | 0  | 0  | 0   | 0  | 0   | 0   |
| Hal_vene | A | 0  | 0  | 0  | 0  | 0  | 0  | 0  | 0   | 0  | 0   | 0   |
| Has_spic | A | 0  | 0  | 3  | 4  | 2  | 9  | 3  | 0   | 0  | 0   | 0   |
| Hip_hung | A | 0  | 0  | 0  | 2  | 2  | 2  | 0  | 0   | 0  | 0   | 0   |
| Hip_lesm | A | 0  | 0  | 0  | 0  | 2  | 0  | 0  | 1   | 0  | 0   | 0   |
| Hya_scot | A | 0  | 0  | 0  | 2  | 0  | 0  | 0  | 3   | 0  | 0   | 2   |
| Kar_amo  | A | 0  | 0  | 0  | 0  | 0  | 0  | 1  | 0   | 2  | 0   | 8   |
| Kar_clev | A | 0  | 0  | 1  | 3  | 0  | 1  | 4  | 1   | 4  | 0   | 2   |
| Lic_comm | A | 0  | 0  | 0  | 0  | 0  | 0  | 0  | 0   | 0  | 0   | 0   |
| Lic_debi | A | 3  | 1  | 2  | 0  | 0  | 1  | 1  | 0   | 0  | 0   | 0   |
| Lic_gran | A | 0  | 0  | 0  | 0  | 0  | 0  | 0  | 0   | 0  | 1   | 0   |
| Lic_rhom | A | 0  | 0  | 0  | 2  | 0  | 0  | 0  | 0   | 0  | 5   | 0   |
| Lun_bise | A | 2  | 9  | 8  | 11 | 2  | 0  | 0  | 1   | 6  | 2   | 6   |
| Lut_muti | A | 0  | 0  | 0  | 0  | 0  | 0  | 0  | 0   | 0  | 0   | 0   |
| Mar_atom | A | 7  | 10 | 38 | 67 | 37 | 33 | 19 | 25  | 32 | 27  | 21  |
| Mar_schu | A | 0  | 0  | 0  | 0  | 0  | 0  | 0  | 0   | 0  | 0   | 0   |
| Mas_balt | A | 0  | 0  | 0  | 0  | 0  | 0  | 0  | 0   | 0  | 0   | 0   |
| Mas_brau | A | 0  | 0  | 0  | 0  | 0  | 0  | 0  | 0   | 0  | 0   | 0   |
| Mas_elli | A | 0  | 0  | 0  | 0  | 0  | 0  | 0  | 0   | 0  | 0   | 0   |
| Mas_exig | A | 0  | 0  | 0  | 0  | 0  | 0  | 0  | 0   | 0  | 0   | 0   |
| Mas_pumi | A | 2  | 0  | 0  | 0  | 0  | 0  | 6  | 0   | 0  | 0   | 0   |
| Mas_smit | A | 0  | 0  | 8  | 2  | 2  | 23 | 5  | 0   | 0  | 0   | 0   |
| May_atom | A | 0  | 0  | 0  | 0  | 0  | 0  | 1  | 0   | 0  | 0   | 0   |
| Mel_arct | A | 1  | 2  | 0  | 0  | 0  | 0  | 0  | 0   | 0  | 0   | 0   |
| Mel_line | A | 0  | 5  | 2  | 3  | 0  | 1  | 4  | 6   | 12 | 2   | 30  |
| Mel_moni | A | 0  | 0  | 1  | 1  | 1  | 1  | 2  | 0   | 19 | 10  | 67  |
| Mel_numm | A | 0  | 0  | 0  | 0  | 0  | 0  | 0  | 0   | 0  | 2   | 0   |
| Mel_spec | A | 4  | 32 | 8  | 2  | 11 | 13 | 45 | 197 | 18 | 217 | 23  |
| Nav_aren | A | 0  | 0  | 0  | 0  | 0  | 0  | 0  | 0   | 0  | 0   | 0   |
| Nav_brem | A | 0  | 2  | 0  | 0  | 2  | 0  | 0  | 0   | 2  | 0   | 0   |
| Nav_cinc | A | 0  | 0  | 0  | 0  | 0  | 0  | 0  | 0   | 0  | 0   | 0   |
| Nav_clem | A | 0  | 0  | 0  | 0  | 0  | 0  | 0  | 0   | 0  | 0   | 0   |
| Nav_cryp | A | 0  | 0  | 0  | 0  | 0  | 0  | 0  | 0   | 0  | 0   | 0   |
| Nav_digi | A | 0  | 0  | 0  | 0  | 0  | 0  | 0  | 0   | 0  | 0   | 0   |
| Nav_duer | A | 0  | 0  | 0  | 5  | 2  | 8  | 2  | 4   | 0  | 0   | 0   |
| Nav_flan | A | 0  | 0  | 0  | 0  | 1  | 0  | 0  | 0   | 0  | 0   | 0   |
| Nav_greg | A | 3  | 25 | 6  | 3  | 8  | 1  | 4  | 1   | 0  | 6   | 1   |
| Nav_infi | A | 0  | 0  | 0  | 0  | 2  | 14 | 7  | 32  | 6  | 2   | 0   |
| Nav_lanc | A | 2  | 2  | 1  | 0  | 0  | 0  | 0  | 0   | 0  | 0   | 0   |
| Nav_meni | A | 0  | 0  | 0  | 0  | 0  | 0  | 0  | 0   | 0  | 0   | 0   |
| Nav_nole | A | 0  | 0  | 0  | 0  | 0  | 0  | 0  | 0   | 0  | 0   | 0   |
| Nav_pere | A | 0  | 0  | 0  | 0  | 0  | 0  | 0  | 0   | 0  | 0   | 0   |
| Nav_perm | A | 52 | 41 | 34 | 60 | 42 | 11 | 82 | 20  | 95 | 84  | 145 |
| Nav_phyl | A | 2  | 5  | 2  | 2  | 2  | 1  | 0  | 1   | 0  | 1   | 0   |
| Nav_rato | A | 0  | 0  | 0  | 4  | 2  | 0  | 3  | 4   | 2  | 6   | 6   |
| Nav_rhyn | A | 0  | 0  | 0  | 0  | 0  | 0  | 0  | 0   | 0  | 0   | 0   |
| Nav_saco | A | 2  | 0  | 2  | 2  | 0  | 0  | 2  | 0   | 0  | 0   | 0   |
| Nav_sana | A | 0  | 0  | 0  | 0  | 0  | 0  | 0  | 0   | 0  | 0   | 0   |
| Nav_sjoe | A | 0  | 0  | 1  | 0  | 0  | 0  | 0  | 0   | 2  | 0   | 0   |

|          |   |    |    |     |     |     |     |     |     |     |     |     |
|----------|---|----|----|-----|-----|-----|-----|-----|-----|-----|-----|-----|
| Nav_supr | A | 0  | 0  | 0   | 0   | 1   | 0   | 0   | 0   | 0   | 0   | 0   |
| Nav_trip | A | 0  | 2  | 0   | 2   | 0   | 0   | 0   | 1   | 0   | 0   | 0   |
| Nav_vene | A | 0  | 0  | 0   | 1   | 6   | 0   | 0   | 2   | 0   | 0   | 0   |
| Ncy_pusi | A | 0  | 0  | 0   | 0   | 0   | 0   | 0   | 0   | 0   | 0   | 0   |
| Nit_amph | A | 0  | 0  | 0   | 0   | 0   | 4   | 0   | 0   | 0   | 0   | 1   |
| Nit_anla | A | 0  | 0  | 0   | 2   | 0   | 0   | 0   | 0   | 0   | 0   | 0   |
| Nit_aura | A | 2  | 0  | 0   | 0   | 0   | 0   | 0   | 0   | 0   | 0   | 0   |
| Nit_brev | A | 0  | 0  | 0   | 0   | 0   | 0   | 0   | 0   | 0   | 1   | 0   |
| Nit_comm | A | 0  | 0  | 0   | 0   | 0   | 0   | 0   | 0   | 0   | 0   | 0   |
| Nit_diss | A | 0  | 0  | 0   | 0   | 0   | 0   | 0   | 1   | 0   | 0   | 0   |
| Nit_dubi | A | 0  | 0  | 0   | 0   | 0   | 0   | 0   | 0   | 0   | 0   | 0   |
| Nit_eleg | A | 0  | 0  | 2   | 0   | 0   | 0   | 0   | 0   | 0   | 0   | 0   |
| Nit_fili | A | 0  | 0  | 0   | 0   | 22  | 0   | 1   | 8   | 28  | 109 | 101 |
| Nit_flex | A | 0  | 2  | 0   | 0   | 0   | 0   | 0   | 0   | 0   | 0   | 0   |
| Nit_frus | A | 64 | 43 | 120 | 99  | 111 | 46  | 139 | 23  | 53  | 21  | 160 |
| Nit_gand | A | 0  | 0  | 0   | 0   | 0   | 0   | 0   | 0   | 0   | 0   | 0   |
| Nit_heuf | A | 2  | 0  | 0   | 0   | 0   | 0   | 0   | 0   | 0   | 0   | 0   |
| Nit_inco | A | 0  | 1  | 0   | 0   | 2   | 0   | 1   | 1   | 0   | 0   | 2   |
| Nit_lieb | A | 0  | 0  | 0   | 3   | 7   | 10  | 4   | 2   | 0   | 0   | 0   |
| Nit_lisu | A | 0  | 0  | 0   | 0   | 0   | 0   | 0   | 0   | 0   | 2   | 0   |
| Nit_lore | A | 0  | 0  | 0   | 0   | 0   | 0   | 0   | 0   | 0   | 0   | 0   |
| Nit_micr | A | 2  | 0  | 4   | 7   | 19  | 8   | 1   | 2   | 4   | 8   | 6   |
| Nit_pale | A | 0  | 0  | 0   | 0   | 4   | 0   | 0   | 2   | 0   | 1   | 0   |
| Nit_pate | A | 0  | 0  | 0   | 0   | 1   | 0   | 0   | 0   | 0   | 0   | 0   |
| Nit_pcea | A | 1  | 4  | 45  | 86  | 30  | 173 | 27  | 8   | 0   | 9   | 0   |
| Nit_pell | A | 0  | 1  | 0   | 4   | 22  | 2   | 0   | 2   | 0   | 22  | 0   |
| Nit_perm | A | 0  | 0  | 0   | 2   | 0   | 0   | 0   | 1   | 0   | 0   | 0   |
| Nit_pusi | A | 63 | 41 | 5   | 3   | 7   | 0   | 7   | 4   | 0   | 2   | 0   |
| Nit_reve | A | 0  | 0  | 2   | 1   | 0   | 2   | 0   | 1   | 0   | 0   | 0   |
| Nit_rose | A | 7  | 4  | 14  | 23  | 22  | 73  | 50  | 39  | 5   | 25  | 0   |
| Nit_sdea | A | 0  | 0  | 0   | 0   | 0   | 0   | 0   | 0   | 0   | 0   | 0   |
| Nit_sigm | A | 0  | 0  | 0   | 0   | 0   | 0   | 0   | 0   | 0   | 0   | 1   |
| Nit_soci | A | 0  | 0  | 0   | 1   | 3   | 0   | 0   | 0   | 0   | 2   | 0   |
| Nit_subc | A | 0  | 0  | 0   | 0   | 0   | 0   | 0   | 0   | 0   | 0   | 0   |
| Nit_supr | A | 0  | 0  | 0   | 0   | 2   | 2   | 0   | 1   | 2   | 0   | 0   |
| Nit_ther | A | 0  | 4  | 0   | 10  | 71  | 2   | 0   | 3   | 0   | 19  | 2   |
| Nit_vald | A | 2  | 0  | 0   | 0   | 0   | 2   | 4   | 5   | 3   | 1   | 4   |
| Ope_muta | A | 4  | 13 | 31  | 52  | 42  | 26  | 22  | 27  | 50  | 13  | 8   |
| Pau_tae  | A | 6  | 2  | 0   | 0   | 1   | 0   | 0   | 0   | 1   | 0   | 0   |
| Pin_eleg | A | 0  | 0  | 0   | 0   | 0   | 0   | 0   | 0   | 0   | 0   | 0   |
| Pin_kroc | A | 0  | 0  | 0   | 0   | 2   | 2   | 0   | 0   | 0   | 0   | 0   |
| Pin_micr | A | 0  | 0  | 0   | 0   | 0   | 0   | 0   | 0   | 0   | 0   | 0   |
| Ple_elon | A | 0  | 0  | 0   | 0   | 0   | 2   | 0   | 0   | 0   | 0   | 0   |
| Ple_sali | A | 0  | 0  | 0   | 0   | 0   | 0   | 0   | 2   | 0   | 0   | 1   |
| Plt_deli | A | 4  | 4  | 0   | 1   | 3   | 0   | 2   | 1   | 0   | 0   | 0   |
| Plt_disp | A | 0  | 0  | 0   | 0   | 0   | 0   | 2   | 0   | 0   | 0   | 0   |
| Plt_freq | A | 0  | 0  | 0   | 0   | 0   | 0   | 0   | 0   | 0   | 0   | 1   |
| Plt_hauc | A | 1  | 2  | 4   | 0   | 6   | 11  | 4   | 5   | 6   | 2   | 2   |
| Plt_lemm | A | 0  | 0  | 5   | 2   | 2   | 4   | 2   | 2   | 6   | 0   | 2   |
| Plt_sept | A | 0  | 0  | 2   | 0   | 0   | 0   | 0   | 1   | 0   | 0   | 0   |
| Pro_buln | A | 0  | 4  | 0   | 1   | 0   | 0   | 0   | 0   | 0   | 0   | 0   |
| Pse_west | A | 0  | 0  | 0   | 0   | 0   | 0   | 0   | 1   | 2   | 0   | 0   |
| Psf_tene | A | 0  | 0  | 0   | 0   | 0   | 0   | 0   | 0   | 0   | 0   | 0   |
| Pss_brev | A | 0  | 0  | 3   | 8   | 5   | 0   | 1   | 0   | 6   | 0   | 1   |
| Pss_elli | A | 35 | 47 | 124 | 250 | 226 | 192 | 83  | 188 | 122 | 102 | 50  |
| Pss_zeil | A | 4  | 12 | 26  | 20  | 14  | 26  | 14  | 28  | 26  | 19  | 19  |
| Pst_punc | A | 4  | 0  | 0   | 4   | 0   | 0   | 0   | 0   | 0   | 0   | 0   |
| Ptd_gemm | A | 0  | 0  | 0   | 0   | 0   | 0   | 0   | 0   | 0   | 0   | 0   |
| Rei_sinu | A | 0  | 1  | 0   | 0   | 0   | 0   | 0   | 0   | 0   | 0   | 0   |
| Rho_abbr | A | 13 | 21 | 47  | 13  | 10  | 38  | 61  | 7   | 97  | 20  | 35  |
| Rhp_gibb | A | 0  | 0  | 0   | 0   | 0   | 2   | 0   | 0   | 0   | 0   | 0   |
| Rhp_gipa | A | 0  | 0  | 0   | 0   | 0   | 0   | 0   | 0   | 0   | 0   | 0   |
| Sel_pupu | A | 0  | 0  | 0   | 0   | 0   | 0   | 0   | 0   | 0   | 0   | 0   |
| Ske_cost | A | 2  | 1  | 0   | 2   | 0   | 0   | 1   | 0   | 0   | 0   | 0   |
| Std_hant | A | 0  | 0  | 0   | 0   | 0   | 0   | 0   | 0   | 0   | 0   | 0   |
| Std_minu | A | 0  | 0  | 0   | 0   | 0   | 0   | 0   | 0   | 0   | 0   | 0   |
| Stn_simu | A | 0  | 0  | 0   | 0   | 0   | 0   | 0   | 0   | 0   | 0   | 0   |
| Sur_breb | A | 0  | 4  | 1   | 0   | 0   | 0   | 0   | 2   | 0   | 5   | 0   |
| Syn_acus | A | 0  | 0  | 0   | 0   | 0   | 0   | 0   | 0   | 0   | 0   | 0   |
| Tab_fasc | A | 16 | 23 | 15  | 6   | 4   | 29  | 72  | 25  | 76  | 21  | 17  |
| Tab_tabu | A | 3  | 0  | 0   | 0   | 0   | 2   | 7   | 10  | 129 | 37  | 36  |
| Tab_waer | A | 0  | 0  | 0   | 0   | 0   | 0   | 0   | 0   | 0   | 0   | 0   |
| Tal_fene | A | 0  | 0  | 0   | 0   | 0   | 0   | 2   | 0   | 0   | 0   | 0   |
| Tal_floc | A | 0  | 0  | 0   | 0   | 0   | 0   | 0   | 0   | 1   | 0   | 0   |
| Tha_balt | A | 0  | 0  | 2   | 0   | 1   | 1   | 0   | 5   | 2   | 2   | 0   |



|          |   |     |     |    |    |     |     |     |     |     |     |    |
|----------|---|-----|-----|----|----|-----|-----|-----|-----|-----|-----|----|
| Ent_giga | B | 0   | 0   | 0  | 0  | 0   | 0   | 0   | 0   | 0   | 0   | 0  |
| Ent_palu | B | 0   | 5   | 0  | 7  | 1   | 4   | 2   | 11  | 4   | 18  | 2  |
| Ent_pseu | B | 0   | 0   | 0  | 0  | 0   | 0   | 0   | 0   | 0   | 0   | 0  |
| Ent_suri | B | 1   | 0   | 1  | 0  | 0   | 0   | 0   | 1   | 0   | 0   | 0  |
| Epi_adna | B | 0   | 0   | 0  | 0  | 0   | 2   | 0   | 0   | 0   | 0   | 0  |
| Epi_sore | B | 0   | 0   | 3  | 11 | 7   | 38  | 13  | 8   | 12  | 2   | 14 |
| Epi_tuwe | B | 0   | 0   | 2  | 1  | 0   | 4   | 0   | 0   | 0   | 0   | 2  |
| Fal_cryp | B | 0   | 0   | 0  | 0  | 2   | 0   | 0   | 0   | 0   | 0   | 0  |
| Fal_psli | B | 0   | 0   | 0  | 0  | 0   | 0   | 0   | 0   | 0   | 0   | 0  |
| Fal_pygm | B | 0   | 0   | 0  | 0  | 0   | 0   | 0   | 0   | 0   | 0   | 0  |
| Fra_amic | B | 0   | 13  | 2  | 7  | 2   | 6   | 4   | 4   | 4   | 6   | 1  |
| Fra_cava | B | 0   | 0   | 0  | 1  | 0   | 0   | 1   | 1   | 0   | 0   | 2  |
| Fra_cons | B | 2   | 0   | 15 | 4  | 25  | 36  | 54  | 123 | 106 | 47  | 3  |
| Fra_hydu | B | 0   | 0   | 0  | 0  | 0   | 0   | 0   | 0   | 0   | 0   | 0  |
| Fra_stri | B | 28  | 14  | 13 | 13 | 24  | 2   | 2   | 21  | 24  | 12  | 8  |
| Frp_cyli | B | 0   | 0   | 0  | 0  | 0   | 0   | 0   | 0   | 0   | 0   | 0  |
| Fru_creu | B | 0   | 0   | 0  | 0  | 0   | 0   | 0   | 0   | 0   | 0   | 0  |
| Gom_oliv | B | 128 | 256 | 11 | 15 | 2   | 0   | 16  | 131 | 92  | 153 | 43 |
| Gom_parv | B | 0   | 0   | 0  | 0  | 0   | 0   | 0   | 0   | 0   | 0   | 0  |
| Gon_exig | B | 0   | 0   | 0  | 0  | 0   | 0   | 0   | 0   | 0   | 0   | 0  |
| Gos_pseu | B | 6   | 4   | 0  | 6  | 0   | 5   | 9   | 4   | 0   | 0   | 13 |
| Gra_ocea | B | 0   | 0   | 0  | 0  | 0   | 0   | 0   | 0   | 0   | 0   | 0  |
| Gyr_exim | B | 0   | 0   | 0  | 0  | 0   | 0   | 0   | 0   | 0   | 0   | 0  |
| Gyr_fasc | B | 0   | 0   | 0  | 0  | 0   | 0   | 0   | 0   | 0   | 0   | 0  |
| Hal_acut | B | 2   | 0   | 0  | 0  | 0   | 0   | 4   | 2   | 0   | 0   | 3  |
| Hal_coff | B | 0   | 4   | 2  | 7  | 11  | 2   | 4   | 7   | 5   | 4   | 4  |
| Hal_exig | B | 0   | 0   | 0  | 0  | 0   | 0   | 0   | 0   | 0   | 0   | 0  |
| Hal_hols | B | 0   | 0   | 0  | 0  | 0   | 0   | 1   | 0   | 0   | 0   | 0  |
| Hal_hybr | B | 0   | 0   | 0  | 0  | 0   | 0   | 0   | 0   | 0   | 0   | 0  |
| Hal_luci | B | 0   | 0   | 0  | 0  | 0   | 0   | 0   | 0   | 0   | 0   | 0  |
| Hal_subh | B | 0   | 0   | 0  | 0  | 0   | 0   | 0   | 0   | 0   | 0   | 0  |
| Hal_tene | B | 0   | 1   | 4  | 8  | 8   | 1   | 1   | 0   | 2   | 0   | 1  |
| Hal_vene | B | 0   | 0   | 0  | 1  | 0   | 0   | 0   | 0   | 0   | 0   | 0  |
| Has_spic | B | 2   | 2   | 3  | 7  | 2   | 6   | 2   | 25  | 6   | 7   | 0  |
| Hip_hung | B | 0   | 0   | 0  | 2  | 0   | 0   | 0   | 0   | 0   | 0   | 0  |
| Hip_iesm | B | 0   | 0   | 0  | 1  | 2   | 0   | 0   | 0   | 2   | 1   | 0  |
| Hya_scot | B | 0   | 0   | 0  | 0  | 0   | 0   | 0   | 0   | 0   | 0   | 0  |
| Kar_amoe | B | 0   | 0   | 0  | 0  | 0   | 0   | 0   | 0   | 0   | 0   | 0  |
| Kar_clev | B | 0   | 0   | 0  | 1  | 1   | 0   | 0   | 0   | 2   | 1   | 0  |
| Lic_comm | B | 0   | 0   | 0  | 0  | 0   | 1   | 0   | 5   | 0   | 0   | 0  |
| Lic_debi | B | 1   | 0   | 6  | 0  | 0   | 4   | 5   | 9   | 0   | 1   | 0  |
| Lic_gran | B | 0   | 0   | 0  | 0  | 0   | 0   | 0   | 0   | 0   | 0   | 0  |
| Lic_rhom | B | 0   | 0   | 0  | 0  | 2   | 8   | 11  | 16  | 2   | 2   | 0  |
| Lun_bise | B | 39  | 11  | 11 | 0  | 6   | 0   | 3   | 1   | 2   | 0   | 2  |
| Lut_muti | B | 0   | 0   | 0  | 0  | 0   | 2   | 0   | 0   | 0   | 0   | 0  |
| Mar_atom | B | 6   | 17  | 11 | 15 | 20  | 14  | 4   | 9   | 9   | 5   | 7  |
| Mar_schu | B | 0   | 0   | 0  | 0  | 0   | 0   | 2   | 0   | 0   | 0   | 0  |
| Mas_balt | B | 0   | 0   | 0  | 0  | 0   | 8   | 0   | 0   | 0   | 0   | 0  |
| Mas_brau | B | 0   | 0   | 0  | 0  | 0   | 0   | 0   | 0   | 0   | 0   | 0  |
| Mas_elli | B | 0   | 0   | 0  | 0  | 0   | 2   | 0   | 0   | 0   | 0   | 4  |
| Mas_exig | B | 0   | 0   | 0  | 0  | 0   | 0   | 0   | 0   | 0   | 0   | 0  |
| Mas_pumi | B | 0   | 0   | 1  | 0  | 0   | 23  | 28  | 2   | 0   | 0   | 4  |
| Mas_smit | B | 0   | 4   | 20 | 19 | 8   | 230 | 95  | 6   | 3   | 0   | 47 |
| May_atom | B | 0   | 0   | 0  | 0  | 0   | 0   | 0   | 0   | 0   | 0   | 0  |
| Mel_arct | B | 0   | 0   | 0  | 0  | 0   | 0   | 0   | 0   | 0   | 0   | 0  |
| Mel_line | B | 0   | 0   | 0  | 2  | 3   | 2   | 0   | 0   | 0   | 0   | 0  |
| Mel_moni | B | 0   | 0   | 0  | 0  | 0   | 0   | 1   | 0   | 0   | 0   | 37 |
| Mel_numm | B | 0   | 0   | 0  | 0  | 0   | 0   | 0   | 0   | 0   | 0   | 0  |
| Mel_spec | B | 0   | 0   | 0  | 0  | 0   | 3   | 35  | 6   | 12  | 65  | 4  |
| Nav_aren | B | 0   | 0   | 0  | 0  | 0   | 0   | 0   | 0   | 0   | 0   | 0  |
| Nav_brem | B | 0   | 0   | 0  | 0  | 0   | 0   | 0   | 2   | 0   | 0   | 0  |
| Nav_cinc | B | 0   | 0   | 0  | 0  | 0   | 0   | 0   | 0   | 0   | 0   | 0  |
| Nav_clem | B | 0   | 0   | 0  | 0  | 0   | 0   | 0   | 0   | 0   | 0   | 0  |
| Nav_cryp | B | 0   | 0   | 0  | 0  | 0   | 0   | 0   | 0   | 0   | 0   | 0  |
| Nav_digi | B | 0   | 0   | 0  | 0  | 2   | 0   | 0   | 0   | 1   | 0   | 0  |
| Nav_duer | B | 0   | 4   | 0  | 0  | 2   | 4   | 5   | 11  | 0   | 0   | 0  |
| Nav_flan | B | 0   | 0   | 0  | 0  | 0   | 0   | 1   | 0   | 1   | 0   | 0  |
| Nav_greg | B | 3   | 5   | 2  | 6  | 19  | 0   | 2   | 3   | 6   | 4   | 0  |
| Nav_infi | B | 0   | 0   | 0  | 0  | 0   | 0   | 4   | 4   | 5   | 28  | 0  |
| Nav_lanc | B | 0   | 0   | 0  | 0  | 0   | 0   | 0   | 0   | 0   | 0   | 0  |
| Nav_meni | B | 0   | 0   | 0  | 0  | 0   | 0   | 0   | 0   | 0   | 0   | 0  |
| Nav_nole | B | 0   | 0   | 0  | 0  | 0   | 0   | 0   | 0   | 2   | 0   | 0  |
| Nav_pere | B | 0   | 0   | 0  | 0  | 0   | 0   | 0   | 0   | 0   | 0   | 0  |
| Nav_perm | B | 21  | 46  | 21 | 62 | 117 | 20  | 105 | 25  | 66  | 52  | 61 |
| Nav_phyl | B | 0   | 2   | 0  | 4  | 4   | 0   | 2   | 0   | 0   | 0   | 0  |

|          |   |     |    |     |     |     |     |     |    |     |    |     |
|----------|---|-----|----|-----|-----|-----|-----|-----|----|-----|----|-----|
| Nav_rato | B | 0   | 2  | 0   | 0   | 0   | 0   | 0   | 0  | 0   | 0  | 12  |
| Nav_rhyn | B | 0   | 0  | 0   | 0   | 0   | 0   | 0   | 0  | 0   | 0  | 0   |
| Nav_saco | B | 0   | 0  | 0   | 0   | 0   | 4   | 0   | 0  | 2   | 0  | 0   |
| Nav_sana | B | 0   | 0  | 0   | 0   | 0   | 0   | 2   | 0  | 0   | 0  | 0   |
| Nav_sjoe | B | 8   | 2  | 1   | 0   | 0   | 0   | 0   | 0  | 0   | 0  | 0   |
| Nav_supr | B | 4   | 0  | 0   | 0   | 0   | 0   | 0   | 0  | 0   | 0  | 0   |
| Nav_trip | B | 0   | 0  | 0   | 2   | 0   | 0   | 0   | 0  | 0   | 0  | 0   |
| Nav_vene | B | 0   | 0  | 0   | 0   | 0   | 0   | 2   | 0  | 0   | 0  | 0   |
| Ncy_pusi | B | 0   | 0  | 0   | 2   | 0   | 0   | 2   | 0  | 0   | 0  | 2   |
| Nit_amph | B | 0   | 0  | 0   | 0   | 0   | 0   | 0   | 0  | 0   | 0  | 0   |
| Nit_anla | B | 0   | 0  | 0   | 2   | 0   | 0   | 0   | 0  | 1   | 0  | 0   |
| Nit_aura | B | 0   | 0  | 0   | 0   | 0   | 0   | 0   | 0  | 0   | 0  | 0   |
| Nit_brev | B | 0   | 0  | 0   | 0   | 0   | 0   | 0   | 0  | 0   | 0  | 0   |
| Nit_comm | B | 0   | 0  | 0   | 0   | 0   | 0   | 0   | 0  | 0   | 0  | 0   |
| Nit_diss | B | 0   | 0  | 0   | 0   | 0   | 0   | 0   | 0  | 0   | 0  | 0   |
| Nit_dubi | B | 0   | 0  | 0   | 0   | 0   | 0   | 0   | 0  | 0   | 0  | 0   |
| Nit_eleg | B | 0   | 0  | 0   | 0   | 0   | 0   | 0   | 0  | 0   | 0  | 0   |
| Nit_fili | B | 0   | 2  | 0   | 0   | 2   | 0   | 0   | 0  | 0   | 0  | 0   |
| Nit_flex | B | 0   | 0  | 0   | 0   | 0   | 0   | 0   | 2  | 3   | 4  | 0   |
| Nit_frus | B | 218 | 59 | 330 | 399 | 129 | 168 | 73  | 53 | 98  | 25 | 257 |
| Nit_gand | B | 0   | 0  | 0   | 0   | 0   | 0   | 0   | 0  | 0   | 0  | 0   |
| Nit_heuf | B | 0   | 0  | 0   | 0   | 0   | 0   | 0   | 0  | 0   | 0  | 0   |
| Nit_inco | B | 0   | 0  | 0   | 0   | 0   | 0   | 0   | 0  | 0   | 0  | 0   |
| Nit_lieb | B | 4   | 0  | 2   | 4   | 2   | 8   | 5   | 2  | 0   | 0  | 10  |
| Nit_lisu | B | 0   | 0  | 0   | 0   | 0   | 0   | 0   | 0  | 0   | 0  | 0   |
| Nit_lore | B | 0   | 0  | 0   | 0   | 0   | 0   | 0   | 0  | 0   | 0  | 0   |
| Nit_micr | B | 0   | 4  | 6   | 3   | 8   | 2   | 3   | 5  | 5   | 0  | 3   |
| Nit_pale | B | 8   | 9  | 2   | 1   | 2   | 6   | 2   | 2  | 0   | 0  | 19  |
| Nit_pate | B | 4   | 0  | 0   | 0   | 0   | 1   | 2   | 2  | 2   | 0  | 0   |
| Nit_pcea | B | 9   | 24 | 20  | 14  | 118 | 21  | 18  | 47 | 14  | 34 | 11  |
| Nit_pell | B | 0   | 1  | 0   | 0   | 2   | 2   | 0   | 0  | 8   | 40 | 1   |
| Nit_perm | B | 0   | 0  | 0   | 0   | 0   | 0   | 0   | 0  | 0   | 0  | 0   |
| Nit_pusi | B | 8   | 0  | 0   | 0   | 2   | 8   | 2   | 3  | 0   | 0  | 0   |
| Nit_reve | B | 0   | 0  | 0   | 0   | 0   | 0   | 0   | 0  | 0   | 0  | 0   |
| Nit_rose | B | 18  | 20 | 10  | 12  | 32  | 17  | 15  | 18 | 21  | 30 | 16  |
| Nit_sdea | B | 0   | 0  | 0   | 0   | 0   | 0   | 0   | 0  | 0   | 0  | 0   |
| Nit_sigm | B | 0   | 0  | 0   | 1   | 0   | 0   | 0   | 0  | 0   | 0  | 0   |
| Nit_soci | B | 0   | 0  | 0   | 0   | 0   | 0   | 0   | 0  | 0   | 0  | 0   |
| Nit_subc | B | 0   | 0  | 0   | 0   | 0   | 0   | 0   | 0  | 1   | 4  | 0   |
| Nit_supr | B | 0   | 0  | 1   | 1   | 4   | 0   | 0   | 2  | 3   | 2  | 0   |
| Nit_ther | B | 1   | 1  | 1   | 0   | 0   | 0   | 6   | 11 | 38  | 48 | 4   |
| Nit_vald | B | 3   | 0  | 4   | 6   | 0   | 7   | 1   | 0  | 0   | 0  | 0   |
| Ope_muta | B | 0   | 4  | 3   | 26  | 16  | 20  | 11  | 4  | 13  | 7  | 0   |
| Pau_tae  | B | 1   | 0  | 0   | 0   | 2   | 0   | 0   | 0  | 0   | 0  | 1   |
| Pin_eleg | B | 0   | 0  | 0   | 0   | 0   | 0   | 0   | 0  | 0   | 0  | 0   |
| Pin_kroc | B | 0   | 0  | 0   | 0   | 0   | 0   | 0   | 0  | 0   | 0  | 0   |
| Pin_micr | B | 0   | 0  | 0   | 0   | 0   | 0   | 0   | 0  | 0   | 0  | 0   |
| Ple_elon | B | 0   | 0  | 0   | 0   | 0   | 0   | 0   | 0  | 0   | 0  | 0   |
| Ple_sali | B | 0   | 0  | 0   | 0   | 0   | 0   | 0   | 0  | 0   | 0  | 0   |
| Plt_deli | B | 0   | 0  | 0   | 3   | 0   | 1   | 2   | 0  | 1   | 0  | 0   |
| Plt_disp | B | 0   | 0  | 0   | 0   | 0   | 0   | 0   | 0  | 0   | 0  | 0   |
| Plt_freq | B | 0   | 0  | 0   | 0   | 0   | 0   | 0   | 0  | 0   | 0  | 0   |
| Plt_hauc | B | 0   | 5  | 2   | 0   | 7   | 4   | 3   | 3  | 1   | 1  | 1   |
| Plt_lemm | B | 0   | 0  | 2   | 0   | 1   | 0   | 0   | 3  | 1   | 0  | 0   |
| Plt_sept | B | 0   | 0  | 0   | 0   | 0   | 0   | 0   | 0  | 0   | 0  | 0   |
| Pro_buln | B | 0   | 4  | 0   | 0   | 0   | 0   | 7   | 0  | 0   | 0  | 0   |
| Pse_west | B | 0   | 0  | 0   | 0   | 0   | 0   | 0   | 0  | 0   | 0  | 0   |
| Psf_tene | B | 0   | 0  | 0   | 0   | 0   | 0   | 0   | 0  | 0   | 0  | 0   |
| Pss_brev | B | 0   | 2  | 0   | 5   | 3   | 6   | 0   | 4  | 5   | 3  | 0   |
| Pss_elli | B | 17  | 57 | 46  | 100 | 77  | 110 | 74  | 53 | 55  | 39 | 24  |
| Pss_zeil | B | 4   | 10 | 8   | 7   | 14  | 9   | 13  | 14 | 14  | 17 | 3   |
| Pst_punc | B | 0   | 0  | 0   | 1   | 0   | 0   | 0   | 0  | 0   | 0  | 0   |
| Ptd_gemm | B | 0   | 0  | 0   | 0   | 0   | 0   | 0   | 0  | 0   | 0  | 0   |
| Rei_sinu | B | 0   | 0  | 0   | 0   | 0   | 0   | 0   | 0  | 0   | 0  | 0   |
| Rho_abbr | B | 15  | 13 | 43  | 42  | 57  | 52  | 121 | 64 | 108 | 19 | 227 |
| Rhp_gibb | B | 0   | 0  | 0   | 0   | 0   | 0   | 2   | 2  | 0   | 0  | 0   |
| Rhp_gipa | B | 0   | 0  | 0   | 0   | 0   | 0   | 0   | 0  | 0   | 0  | 0   |
| Sel_pupu | B | 0   | 0  | 0   | 0   | 0   | 0   | 0   | 0  | 0   | 0  | 0   |
| Ske_cost | B | 4   | 3  | 0   | 0   | 0   | 0   | 0   | 0  | 0   | 0  | 0   |
| Std_hant | B | 0   | 0  | 0   | 0   | 0   | 0   | 0   | 0  | 0   | 0  | 0   |
| Std_minu | B | 0   | 0  | 0   | 0   | 0   | 0   | 0   | 0  | 0   | 0  | 0   |
| Stn_simu | B | 0   | 0  | 0   | 0   | 0   | 0   | 0   | 0  | 0   | 0  | 0   |
| Sur_breb | B | 2   | 0  | 0   | 0   | 0   | 0   | 1   | 0  | 2   | 1  | 2   |
| Syn_acus | B | 0   | 0  | 0   | 0   | 0   | 0   | 0   | 0  | 0   | 0  | 0   |
| Tab_fasc | B | 17  | 10 | 6   | 9   | 15  | 13  | 34  | 42 | 45  | 38 | 12  |









|           |   |     |     |     |    |    |    |     |    |    |     |    |
|-----------|---|-----|-----|-----|----|----|----|-----|----|----|-----|----|
| Std_minu  | C | 0   | 0   | 0   | 0  | 0  | 0  | 0   | 0  | 0  | 0   | 0  |
| Stn_simu  | C | 0   | 0   | 0   | 0  | 0  | 0  | 0   | 0  | 0  | 0   | 0  |
| Sur_breb  | C | 5   | 2   | 0   | 0  | 0  | 1  | 0   | 0  | 0  | 7   | 0  |
| Syn_acus  | C | 0   | 0   | 0   | 0  | 0  | 0  | 0   | 0  | 0  | 0   | 0  |
| Tab_fasc  | C | 57  | 43  | 12  | 11 | 20 | 27 | 26  | 33 | 41 | 14  | 15 |
| Tab_tabu  | C | 2   | 2   | 1   | 0  | 16 | 1  | 0   | 4  | 24 | 8   | 13 |
| Tab_waer  | C | 0   | 0   | 0   | 0  | 0  | 0  | 0   | 0  | 0  | 0   | 0  |
| Tal_fene  | C | 0   | 0   | 0   | 0  | 0  | 0  | 0   | 0  | 0  | 0   | 0  |
| Tal_floc  | C | 0   | 0   | 1   | 0  | 0  | 0  | 0   | 0  | 0  | 0   | 0  |
| Tha_balt  | C | 0   | 2   | 0   | 2  | 0  | 0  | 1   | 0  | 0  | 0   | 1  |
| Tha_leva  | C | 4   | 2   | 0   | 0  | 0  | 0  | 0   | 0  | 0  | 0   | 0  |
| Tha_pros  | C | 0   | 0   | 0   | 0  | 0  | 0  | 0   | 0  | 1  | 0   | 5  |
| Tha_pseu  | C | 0   | 0   | 1   | 1  | 0  | 0  | 0   | 0  | 0  | 0   | 1  |
| Tro_dann  | C | 0   | 0   | 0   | 0  | 0  | 0  | 0   | 0  | 0  | 0   | 0  |
| Try_angu  | C | 0   | 0   | 0   | 0  | 0  | 0  | 0   | 0  | 0  | 0   | 0  |
| Try_apic  | C | 0   | 0   | 0   | 2  | 0  | 0  | 0   | 0  | 0  | 0   | 2  |
| Try_ardu  | C | 0   | 0   | 0   | 0  | 0  | 0  | 0   | 0  | 0  | 2   | 0  |
| Try_hung  | C | 0   | 0   | 0   | 0  | 0  | 0  | 0   | 0  | 0  | 0   | 0  |
| Try_levi  | C | 0   | 0   | 0   | 0  | 0  | 0  | 0   | 0  | 0  | 0   | 2  |
| Acd_minu  | D | 2   | 5   | 8   | 9  | 12 | 62 | 15  | 20 | 0  | 0   | 7  |
| Acd_pyre  | D | 0   | 0   | 0   | 0  | 0  | 2  | 0   | 0  | 0  | 0   | 0  |
| Acd_suba  | D | 0   | 0   | 0   | 2  | 0  | 0  | 0   | 0  | 0  | 0   | 0  |
| Ach_bica  | D | 0   | 0   | 0   | 0  | 0  | 0  | 0   | 0  | 0  | 0   | 0  |
| Ach_brev  | D | 0   | 0   | 0   | 0  | 0  | 0  | 0   | 0  | 0  | 0   | 0  |
| Ach_brin  | D | 0   | 0   | 0   | 0  | 0  | 0  | 0   | 1  | 0  | 0   | 0  |
| Ach_long  | D | 1   | 0   | 0   | 0  | 0  | 0  | 0   | 0  | 0  | 0   | 0  |
| Ach_misc  | D | 2   | 0   | 0   | 6  | 6  | 0  | 0   | 4  | 12 | 0   | 2  |
| Ach_vist  | D | 0   | 0   | 0   | 0  | 0  | 2  | 0   | 0  | 0  | 0   | 0  |
| Act_occrr | D | 0   | 0   | 0   | 0  | 0  | 0  | 0   | 0  | 0  | 0   | 0  |
| Amp_comm  | D | 0   | 0   | 0   | 0  | 0  | 0  | 0   | 0  | 0  | 0   | 0  |
| Amp_copu  | D | 0   | 0   | 0   | 0  | 0  | 0  | 0   | 2  | 0  | 0   | 0  |
| Amp_fleb  | D | 9   | 27  | 30  | 19 | 24 | 9  | 3   | 6  | 3  | 4   | 0  |
| Amp_inar  | D | 0   | 0   | 0   | 0  | 0  | 0  | 0   | 0  | 0  | 0   | 0  |
| Amp_line  | D | 0   | 0   | 0   | 0  | 0  | 0  | 0   | 0  | 0  | 0   | 0  |
| Amp_micr  | D | 0   | 0   | 0   | 0  | 0  | 0  | 0   | 0  | 0  | 0   | 0  |
| Amp_oval  | D | 0   | 0   | 0   | 0  | 0  | 0  | 0   | 0  | 0  | 0   | 0  |
| Amp_pedi  | D | 0   | 6   | 3   | 18 | 8  | 1  | 4   | 11 | 5  | 3   | 15 |
| Amp_stau  | D | 0   | 0   | 0   | 2  | 0  | 0  | 0   | 0  | 0  | 0   | 0  |
| Ane_tusc  | D | 0   | 0   | 0   | 0  | 0  | 0  | 0   | 0  | 0  | 1   | 0  |
| Asa_bahu  | D | 0   | 0   | 0   | 0  | 0  | 0  | 0   | 0  | 1  | 0   | 0  |
| Ast_form  | D | 0   | 0   | 1   | 0  | 0  | 0  | 0   | 0  | 0  | 0   | 0  |
| Aul_spp   | D | 0   | 0   | 0   | 5  | 2  | 0  | 0   | 0  | 0  | 2   | 4  |
| Bac_paxi  | D | 1   | 0   | 5   | 0  | 3  | 1  | 10  | 46 | 89 | 61  | 70 |
| Ber_ruti  | D | 345 | 221 | 158 | 11 | 15 | 21 | 1   | 35 | 63 | 40  | 60 |
| Bra_apon  | D | 0   | 2   | 1   | 0  | 0  | 0  | 0   | 0  | 0  | 0   | 0  |
| Bre_lanc  | D | 2   | 0   | 0   | 1  | 0  | 0  | 0   | 0  | 10 | 7   | 15 |
| Cal_baci  | D | 0   | 0   | 0   | 0  | 0  | 0  | 0   | 0  | 0  | 0   | 0  |
| Cer_clos  | D | 0   | 1   | 0   | 8  | 3  | 5  | 16  | 0  | 2  | 0   | 0  |
| Cha_spp.  | D | 25  | 28  | 35  | 14 | 12 | 1  | 5   | 4  | 2  | 4   | 1  |
| Chp_marg  | D | 0   | 0   | 1   | 1  | 1  | 0  | 0   | 0  | 1  | 0   | 3  |
| Coa_guil  | D | 0   | 0   | 0   | 0  | 0  | 0  | 0   | 0  | 0  | 0   | 0  |
| Coc_neod  | D | 0   | 0   | 5   | 10 | 4  | 0  | 4   | 0  | 2  | 1   | 0  |
| Coc_neot  | D | 0   | 0   | 0   | 0  | 0  | 2  | 1   | 0  | 0  | 1   | 2  |
| Coc_pedi  | D | 0   | 0   | 0   | 3  | 7  | 40 | 11  | 5  | 0  | 2   | 4  |
| Coc_pelt  | D | 0   | 0   | 0   | 0  | 0  | 0  | 0   | 0  | 0  | 0   | 2  |
| Coc_plac  | D | 0   | 1   | 1   | 5  | 1  | 11 | 6   | 6  | 6  | 4   | 6  |
| Coc_psth  | D | 1   | 0   | 0   | 2  | 2  | 0  | 0   | 0  | 0  | 0   | 0  |
| Coc_scut  | D | 0   | 0   | 0   | 0  | 0  | 0  | 0   | 0  | 0  | 0   | 0  |
| Con_weis  | D | 0   | 0   | 0   | 0  | 0  | 0  | 0   | 0  | 0  | 0   | 0  |
| Cra_cusp  | D | 0   | 0   | 0   | 0  | 0  | 0  | 0   | 0  | 0  | 0   | 0  |
| Cte_pulc  | D | 11  | 14  | 2   | 0  | 2  | 0  | 6   | 11 | 0  | 2   | 4  |
| Cyb_amph  | D | 0   | 0   | 0   | 0  | 0  | 0  | 0   | 0  | 0  | 0   | 0  |
| Cyc_atom  | D | 0   | 0   | 1   | 0  | 0  | 0  | 0   | 0  | 0  | 0   | 0  |
| Cyc_choc  | D | 0   | 0   | 5   | 5  | 7  | 0  | 3   | 10 | 8  | 7   | 5  |
| Cyc_mene  | D | 0   | 0   | 0   | 0  | 0  | 0  | 0   | 0  | 0  | 0   | 0  |
| Cyc_radi  | D | 0   | 0   | 0   | 0  | 0  | 0  | 0   | 0  | 0  | 0   | 0  |
| Cyc_stel  | D | 0   | 0   | 0   | 0  | 0  | 0  | 0   | 2  | 0  | 0   | 0  |
| Cyc_stri  | D | 0   | 0   | 0   | 0  | 0  | 0  | 0   | 0  | 0  | 0   | 0  |
| Cyl_grac  | D | 0   | 0   | 0   | 0  | 0  | 0  | 0   | 0  | 0  | 0   | 0  |
| Cym_affi  | D | 0   | 0   | 0   | 0  | 0  | 0  | 0   | 0  | 0  | 0   | 0  |
| Cym_cist  | D | 6   | 2   | 0   | 0  | 0  | 0  | 0   | 1  | 0  | 0   | 0  |
| Cym_lanc  | D | 0   | 0   | 0   | 0  | 0  | 0  | 0   | 0  | 0  | 0   | 0  |
| Den_cret  | D | 0   | 0   | 6   | 0  | 0  | 4  | 34  | 0  | 0  | 2   | 0  |
| Den_sund  | D | 0   | 0   | 0   | 0  | 0  | 0  | 0   | 0  | 0  | 0   | 0  |
| Dia_moni  | D | 73  | 81  | 79  | 42 | 68 | 2  | 281 | 49 | 14 | 104 | 2  |



|          |   |     |    |     |     |     |     |     |     |    |    |     |
|----------|---|-----|----|-----|-----|-----|-----|-----|-----|----|----|-----|
| Nav_duer | D | 0   | 0  | 4   | 8   | 14  | 11  | 8   | 10  | 0  | 2  | 0   |
| Nav_flan | D | 0   | 0  | 0   | 0   | 0   | 0   | 0   | 0   | 0  | 0  | 0   |
| Nav_greg | D | 4   | 3  | 7   | 2   | 6   | 1   | 0   | 4   | 2  | 5  | 10  |
| Nav_infi | D | 0   | 0  | 1   | 0   | 3   | 4   | 0   | 9   | 10 | 4  | 5   |
| Nav_lanc | D | 0   | 2  | 1   | 1   | 0   | 0   | 0   | 0   | 0  | 2  | 0   |
| Nav_meni | D | 0   | 0  | 0   | 0   | 2   | 0   | 0   | 0   | 0  | 0  | 0   |
| Nav_nole | D | 0   | 0  | 0   | 0   | 0   | 0   | 0   | 0   | 0  | 0  | 0   |
| Nav_pere | D | 0   | 0  | 0   | 0   | 0   | 0   | 0   | 0   | 0  | 0  | 0   |
| Nav_perm | D | 60  | 66 | 39  | 48  | 50  | 47  | 41  | 43  | 31 | 23 | 69  |
| Nav_phyl | D | 4   | 2  | 2   | 2   | 4   | 1   | 2   | 0   | 1  | 0  | 1   |
| Nav_rato | D | 0   | 0  | 0   | 0   | 0   | 0   | 0   | 0   | 0  | 0  | 0   |
| Nav_rhyn | D | 0   | 0  | 0   | 0   | 0   | 0   | 0   | 0   | 0  | 0  | 0   |
| Nav_saco | D | 0   | 0  | 0   | 1   | 0   | 0   | 2   | 0   | 1  | 0  | 0   |
| Nav_sana | D | 0   | 0  | 0   | 0   | 0   | 0   | 0   | 0   | 0  | 0  | 0   |
| Nav_sjoe | D | 0   | 0  | 0   | 0   | 0   | 0   | 0   | 0   | 0  | 0  | 0   |
| Nav_supr | D | 0   | 2  | 0   | 2   | 0   | 0   | 0   | 0   | 0  | 0  | 0   |
| Nav_trip | D | 0   | 0  | 0   | 0   | 0   | 0   | 0   | 2   | 0  | 4  | 0   |
| Nav_vene | D | 0   | 0  | 0   | 0   | 0   | 0   | 0   | 0   | 0  | 0  | 0   |
| Ncy_pusi | D | 0   | 2  | 0   | 0   | 0   | 0   | 0   | 0   | 0  | 0  | 0   |
| Nit_amph | D | 0   | 0  | 0   | 0   | 0   | 0   | 0   | 0   | 0  | 0  | 0   |
| Nit_anla | D | 0   | 0  | 1   | 0   | 0   | 0   | 0   | 0   | 2  | 0  | 0   |
| Nit_aura | D | 0   | 0  | 0   | 0   | 0   | 0   | 0   | 0   | 0  | 0  | 0   |
| Nit_brev | D | 0   | 0  | 0   | 0   | 0   | 0   | 0   | 0   | 0  | 0  | 0   |
| Nit_comm | D | 0   | 0  | 0   | 0   | 0   | 0   | 0   | 0   | 0  | 0  | 0   |
| Nit_diss | D | 1   | 0  | 0   | 0   | 0   | 0   | 0   | 0   | 0  | 2  | 0   |
| Nit_dubi | D | 0   | 0  | 0   | 0   | 0   | 0   | 0   | 0   | 0  | 0  | 0   |
| Nit_eleg | D | 0   | 0  | 0   | 0   | 2   | 0   | 0   | 0   | 0  | 0  | 0   |
| Nit_fili | D | 0   | 0  | 2   | 0   | 2   | 0   | 0   | 0   | 0  | 0  | 0   |
| Nit_flex | D | 0   | 1  | 0   | 1   | 0   | 0   | 0   | 0   | 0  | 2  | 0   |
| Nit_frus | D | 103 | 70 | 73  | 84  | 85  | 183 | 148 | 106 | 76 | 62 | 242 |
| Nit_gand | D | 2   | 0  | 0   | 0   | 0   | 0   | 0   | 0   | 0  | 0  | 0   |
| Nit_heuf | D | 0   | 2  | 1   | 0   | 0   | 0   | 0   | 0   | 0  | 0  | 0   |
| Nit_inco | D | 0   | 1  | 1   | 5   | 0   | 2   | 0   | 0   | 0  | 0  | 0   |
| Nit_lieb | D | 0   | 0  | 9   | 2   | 15  | 8   | 8   | 7   | 6  | 10 | 2   |
| Nit_lisu | D | 0   | 2  | 0   | 0   | 0   | 0   | 0   | 0   | 0  | 0  | 0   |
| Nit_lore | D | 0   | 0  | 0   | 0   | 0   | 0   | 0   | 0   | 0  | 0  | 0   |
| Nit_micr | D | 8   | 23 | 22  | 20  | 37  | 46  | 13  | 15  | 24 | 5  | 22  |
| Nit_pale | D | 0   | 2  | 5   | 6   | 1   | 2   | 0   | 8   | 1  | 1  | 0   |
| Nit_pate | D | 0   | 0  | 0   | 0   | 1   | 2   | 0   | 5   | 0  | 0  | 0   |
| Nit_pcea | D | 14  | 16 | 23  | 58  | 136 | 22  | 4   | 31  | 14 | 7  | 1   |
| Nit_pell | D | 6   | 2  | 2   | 6   | 5   | 0   | 4   | 3   | 0  | 0  | 0   |
| Nit_perm | D | 0   | 0  | 0   | 0   | 0   | 0   | 0   | 0   | 0  | 0  | 0   |
| Nit_pusi | D | 10  | 32 | 19  | 4   | 1   | 0   | 0   | 2   | 6  | 0  | 2   |
| Nit_reve | D | 0   | 0  | 0   | 0   | 0   | 0   | 0   | 1   | 0  | 0  | 0   |
| Nit_rose | D | 2   | 13 | 14  | 36  | 60  | 57  | 31  | 52  | 48 | 26 | 21  |
| Nit_sdea | D | 0   | 0  | 0   | 0   | 0   | 0   | 0   | 0   | 0  | 0  | 0   |
| Nit_sigm | D | 0   | 0  | 0   | 3   | 0   | 0   | 0   | 0   | 0  | 0  | 0   |
| Nit_soci | D | 0   | 0  | 0   | 0   | 0   | 0   | 0   | 0   | 0  | 0  | 0   |
| Nit_subc | D | 0   | 0  | 0   | 0   | 0   | 0   | 0   | 0   | 0  | 0  | 0   |
| Nit_supr | D | 0   | 0  | 0   | 2   | 4   | 0   | 0   | 0   | 0  | 2  | 0   |
| Nit_ther | D | 2   | 8  | 11  | 3   | 2   | 8   | 0   | 8   | 1  | 7  | 2   |
| Nit_vald | D | 0   | 0  | 0   | 0   | 3   | 0   | 0   | 0   | 4  | 0  | 0   |
| Ope_muta | D | 5   | 8  | 16  | 26  | 42  | 5   | 7   | 11  | 13 | 31 | 15  |
| Pau_taan | D | 0   | 2  | 1   | 0   | 4   | 0   | 0   | 0   | 0  | 0  | 1   |
| Pin_eleg | D | 0   | 0  | 0   | 0   | 0   | 0   | 0   | 0   | 0  | 0  | 0   |
| Pin_kroc | D | 0   | 0  | 0   | 2   | 0   | 0   | 0   | 0   | 0  | 0  | 0   |
| Pin_micr | D | 0   | 0  | 0   | 0   | 0   | 0   | 0   | 0   | 0  | 0  | 0   |
| Ple_elon | D | 0   | 0  | 0   | 0   | 0   | 0   | 0   | 0   | 0  | 0  | 0   |
| Ple_sali | D | 0   | 0  | 0   | 0   | 0   | 0   | 0   | 0   | 0  | 0  | 0   |
| Plt_deli | D | 0   | 0  | 0   | 8   | 0   | 0   | 0   | 0   | 0  | 0  | 2   |
| Plt_disp | D | 0   | 0  | 0   | 0   | 0   | 0   | 0   | 0   | 0  | 0  | 0   |
| Plt_freq | D | 0   | 0  | 0   | 0   | 0   | 0   | 0   | 0   | 0  | 0  | 0   |
| Plt_hauc | D | 0   | 2  | 3   | 10  | 2   | 5   | 3   | 2   | 2  | 4  | 2   |
| Plt_lemm | D | 0   | 0  | 1   | 2   | 2   | 2   | 4   | 2   | 0  | 0  | 2   |
| Plt_sept | D | 0   | 0  | 0   | 0   | 0   | 0   | 0   | 0   | 0  | 0  | 0   |
| Pro_buln | D | 2   | 2  | 4   | 0   | 0   | 0   | 4   | 0   | 0  | 0  | 0   |
| Pse_west | D | 0   | 0  | 0   | 0   | 0   | 0   | 0   | 0   | 0  | 0  | 0   |
| Psf_tene | D | 0   | 0  | 0   | 0   | 0   | 0   | 0   | 0   | 0  | 2  | 0   |
| Pss_brev | D | 0   | 0  | 2   | 2   | 3   | 1   | 4   | 2   | 0  | 3  | 0   |
| Pss_elli | D | 12  | 30 | 127 | 229 | 146 | 55  | 52  | 84  | 75 | 71 | 48  |
| Pss_zeil | D | 4   | 4  | 25  | 48  | 22  | 12  | 14  | 14  | 6  | 10 | 27  |
| Pst_punc | D | 0   | 1  | 0   | 0   | 0   | 0   | 0   | 0   | 0  | 0  | 2   |
| Ptd_gemm | D | 0   | 0  | 0   | 0   | 0   | 0   | 0   | 0   | 0  | 0  | 0   |
| Rei_sinu | D | 0   | 0  | 0   | 0   | 0   | 0   | 0   | 0   | 0  | 0  | 0   |
| Rho_abbr | D | 29  | 28 | 17  | 43  | 8   | 121 | 30  | 17  | 15 | 27 | 79  |





|          |   |    |     |     |    |     |     |     |     |     |     |     |
|----------|---|----|-----|-----|----|-----|-----|-----|-----|-----|-----|-----|
| Nav_brem | E | 0  | 0   | 0   | 0  | 0   | 2   | 0   | 0   | 0   | 0   | 0   |
| Nav_cinc | E | 0  | 0   | 0   | 0  | 6   | 0   | 0   | 0   | 0   | 0   | 0   |
| Nav_clem | E | 0  | 0   | 0   | 0  | 0   | 0   | 0   | 0   | 0   | 0   | 0   |
| Nav_cryp | E | 0  | 0   | 0   | 0  | 0   | 0   | 0   | 0   | 0   | 0   | 0   |
| Nav_digi | E | 0  | 0   | 0   | 0  | 1   | 0   | 0   | 0   | 0   | 0   | 0   |
| Nav_duer | E | 0  | 4   | 8   | 0  | 0   | 2   | 0   | 4   | 0   | 0   | 0   |
| Nav_flan | E | 0  | 0   | 0   | 0  | 0   | 0   | 0   | 1   | 0   | 0   | 0   |
| Nav_greg | E | 6  | 8   | 4   | 6  | 9   | 1   | 2   | 2   | 2   | 2   | 0   |
| Nav_infi | E | 6  | 2   | 17  | 32 | 6   | 33  | 10  | 16  | 4   | 10  | 0   |
| Nav_lanc | E | 2  | 0   | 0   | 0  | 0   | 0   | 0   | 4   | 1   | 4   | 0   |
| Nav_meni | E | 0  | 0   | 0   | 0  | 0   | 0   | 0   | 0   | 0   | 0   | 0   |
| Nav_nole | E | 0  | 0   | 0   | 0  | 0   | 0   | 0   | 0   | 0   | 0   | 0   |
| Nav_pere | E | 0  | 0   | 0   | 0  | 0   | 0   | 0   | 0   | 0   | 0   | 0   |
| Nav_perm | E | 89 | 151 | 68  | 68 | 81  | 30  | 77  | 124 | 112 | 109 | 73  |
| Nav_phyl | E | 0  | 0   | 2   | 4  | 0   | 3   | 0   | 4   | 2   | 2   | 0   |
| Nav_rato | E | 0  | 4   | 5   | 7  | 0   | 2   | 0   | 0   | 0   | 2   | 0   |
| Nav_rhyn | E | 0  | 0   | 0   | 0  | 0   | 0   | 0   | 0   | 0   | 0   | 0   |
| Nav_saco | E | 0  | 0   | 0   | 0  | 0   | 0   | 0   | 0   | 0   | 0   | 0   |
| Nav_sana | E | 0  | 0   | 0   | 1  | 2   | 0   | 0   | 2   | 0   | 0   | 0   |
| Nav_sjoe | E | 2  | 0   | 0   | 0  | 0   | 0   | 0   | 0   | 0   | 0   | 0   |
| Nav_supr | E | 0  | 0   | 0   | 1  | 0   | 0   | 0   | 0   | 0   | 0   | 0   |
| Nav_trip | E | 2  | 0   | 0   | 0  | 0   | 0   | 0   | 0   | 0   | 0   | 0   |
| Nav_vene | E | 0  | 0   | 0   | 4  | 0   | 0   | 0   | 0   | 3   | 2   | 0   |
| Ncy_pusi | E | 0  | 0   | 0   | 0  | 0   | 0   | 0   | 0   | 0   | 0   | 0   |
| Nit_amph | E | 0  | 0   | 0   | 0  | 0   | 0   | 0   | 1   | 0   | 0   | 0   |
| Nit_anla | E | 2  | 0   | 0   | 0  | 0   | 1   | 0   | 0   | 0   | 0   | 0   |
| Nit_aura | E | 0  | 0   | 0   | 0  | 0   | 0   | 0   | 0   | 0   | 0   | 0   |
| Nit_brev | E | 0  | 0   | 0   | 0  | 0   | 0   | 0   | 0   | 0   | 0   | 0   |
| Nit_comm | E | 0  | 0   | 0   | 0  | 0   | 0   | 0   | 0   | 0   | 0   | 0   |
| Nit_diss | E | 0  | 0   | 0   | 0  | 0   | 0   | 0   | 0   | 0   | 0   | 0   |
| Nit_dubi | E | 0  | 0   | 0   | 0  | 0   | 0   | 0   | 0   | 2   | 0   | 0   |
| Nit_eleg | E | 0  | 0   | 0   | 0  | 0   | 0   | 0   | 0   | 0   | 0   | 0   |
| Nit_fili | E | 5  | 3   | 7   | 57 | 12  | 0   | 4   | 31  | 159 | 117 | 124 |
| Nit_flex | E | 0  | 0   | 0   | 0  | 0   | 0   | 0   | 0   | 0   | 0   | 0   |
| Nit_frus | E | 30 | 128 | 57  | 87 | 58  | 41  | 80  | 54  | 78  | 27  | 68  |
| Nit_gand | E | 0  | 0   | 0   | 0  | 0   | 0   | 0   | 0   | 0   | 0   | 0   |
| Nit_heuf | E | 0  | 0   | 0   | 0  | 0   | 0   | 0   | 0   | 0   | 0   | 0   |
| Nit_inco | E | 0  | 0   | 0   | 0  | 0   | 0   | 0   | 0   | 0   | 0   | 0   |
| Nit_lieb | E | 2  | 0   | 0   | 2  | 2   | 2   | 0   | 0   | 0   | 0   | 1   |
| Nit_lisu | E | 2  | 0   | 0   | 0  | 0   | 0   | 0   | 0   | 0   | 0   | 0   |
| Nit_lore | E | 0  | 0   | 0   | 0  | 0   | 0   | 0   | 0   | 0   | 0   | 0   |
| Nit_micr | E | 4  | 4   | 31  | 20 | 12  | 6   | 26  | 22  | 15  | 11  | 12  |
| Nit_pale | E | 0  | 4   | 0   | 4  | 0   | 1   | 0   | 2   | 4   | 4   | 0   |
| Nit_pate | E | 0  | 0   | 0   | 0  | 0   | 0   | 0   | 0   | 0   | 0   | 0   |
| Nit_pcea | E | 3  | 30  | 71  | 47 | 35  | 8   | 0   | 7   | 0   | 2   | 0   |
| Nit_pell | E | 0  | 0   | 0   | 13 | 0   | 2   | 0   | 0   | 2   | 34  | 0   |
| Nit_perm | E | 0  | 0   | 0   | 0  | 0   | 0   | 0   | 0   | 0   | 0   | 0   |
| Nit_pusi | E | 0  | 2   | 7   | 76 | 8   | 0   | 2   | 0   | 0   | 0   | 0   |
| Nit_reve | E | 0  | 0   | 0   | 0  | 0   | 0   | 0   | 2   | 0   | 0   | 0   |
| Nit_rose | E | 9  | 29  | 81  | 53 | 97  | 38  | 17  | 40  | 32  | 33  | 2   |
| Nit_sdea | E | 0  | 0   | 0   | 0  | 0   | 0   | 0   | 0   | 0   | 0   | 0   |
| Nit_sigm | E | 0  | 0   | 0   | 0  | 0   | 0   | 0   | 0   | 0   | 0   | 2   |
| Nit_soci | E | 0  | 0   | 0   | 0  | 0   | 0   | 0   | 0   | 0   | 0   | 0   |
| Nit_subc | E | 0  | 0   | 0   | 0  | 0   | 0   | 0   | 0   | 0   | 0   | 0   |
| Nit_supr | E | 0  | 0   | 2   | 0  | 6   | 0   | 10  | 0   | 0   | 2   | 2   |
| Nit_ther | E | 1  | 3   | 3   | 2  | 2   | 2   | 0   | 0   | 0   | 20  | 0   |
| Nit_vald | E | 0  | 5   | 0   | 2  | 3   | 6   | 0   | 0   | 0   | 2   | 0   |
| Ope_muta | E | 3  | 21  | 17  | 27 | 5   | 19  | 28  | 49  | 11  | 10  | 13  |
| Pau_tae  | E | 0  | 1   | 0   | 1  | 0   | 0   | 0   | 0   | 0   | 0   | 0   |
| Pin_eleg | E | 0  | 0   | 0   | 0  | 0   | 0   | 0   | 0   | 0   | 0   | 0   |
| Pin_kroc | E | 0  | 0   | 0   | 0  | 0   | 0   | 0   | 0   | 0   | 0   | 0   |
| Pin_micr | E | 0  | 0   | 0   | 0  | 0   | 0   | 0   | 0   | 0   | 0   | 0   |
| Ple_elon | E | 0  | 0   | 0   | 0  | 0   | 0   | 0   | 1   | 0   | 0   | 0   |
| Ple_sali | E | 0  | 0   | 0   | 0  | 0   | 2   | 10  | 0   | 2   | 0   | 2   |
| Plt_deli | E | 1  | 3   | 2   | 4  | 1   | 0   | 4   | 0   | 0   | 3   | 0   |
| Plt_disp | E | 0  | 0   | 0   | 0  | 0   | 0   | 0   | 0   | 0   | 0   | 0   |
| Plt_freq | E | 0  | 0   | 0   | 0  | 0   | 0   | 0   | 0   | 0   | 0   | 0   |
| Plt_hauc | E | 0  | 4   | 3   | 2  | 2   | 6   | 4   | 5   | 4   | 0   | 4   |
| Plt_lemm | E | 0  | 0   | 0   | 0  | 2   | 0   | 0   | 2   | 0   | 0   | 3   |
| Plt_sept | E | 1  | 1   | 2   | 2  | 0   | 9   | 0   | 0   | 4   | 0   | 2   |
| Pro_buln | E | 2  | 0   | 2   | 2  | 0   | 23  | 8   | 7   | 4   | 5   | 0   |
| Pse_west | E | 0  | 0   | 0   | 0  | 0   | 0   | 0   | 0   | 0   | 0   | 0   |
| Psf_tene | E | 0  | 0   | 0   | 0  | 0   | 0   | 0   | 0   | 0   | 0   | 0   |
| Pss_brev | E | 0  | 2   | 2   | 1  | 2   | 5   | 5   | 4   | 0   | 2   | 0   |
| Pss_elli | E | 45 | 51  | 142 | 95 | 103 | 183 | 125 | 158 | 64  | 25  | 69  |











|          |   |     |     |    |    |    |    |    |    |    |    |    |
|----------|---|-----|-----|----|----|----|----|----|----|----|----|----|
| Cte_pulc | G | 10  | 2   | 0  | 3  | 2  | 0  | 0  | 0  | 0  | 0  | 0  |
| Cyb_amph | G | 0   | 0   | 0  | 0  | 0  | 1  | 0  | 0  | 0  | 0  | 0  |
| Cyc_atom | G | 0   | 0   | 0  | 1  | 0  | 0  | 0  | 0  | 0  | 0  | 0  |
| Cyc_choc | G | 0   | 1   | 3  | 5  | 9  | 2  | 4  | 13 | 8  | 8  | 16 |
| Cyc_mene | G | 0   | 0   | 0  | 0  | 0  | 0  | 0  | 0  | 0  | 1  | 0  |
| Cyc_radi | G | 0   | 0   | 0  | 0  | 0  | 0  | 0  | 0  | 0  | 0  | 0  |
| Cyc_stel | G | 0   | 0   | 0  | 0  | 0  | 0  | 0  | 0  | 0  | 0  | 0  |
| Cyc_stri | G | 0   | 0   | 0  | 0  | 0  | 0  | 2  | 0  | 0  | 0  | 0  |
| Cyl_grac | G | 0   | 0   | 0  | 0  | 0  | 0  | 0  | 0  | 0  | 0  | 0  |
| Cym_affi | G | 0   | 0   | 0  | 0  | 0  | 0  | 2  | 0  | 0  | 0  | 0  |
| Cym_cist | G | 0   | 0   | 0  | 0  | 0  | 0  | 0  | 0  | 0  | 0  | 0  |
| Cym_lanc | G | 0   | 0   | 0  | 0  | 0  | 0  | 0  | 2  | 0  | 0  | 0  |
| Den_cret | G | 0   | 0   | 0  | 0  | 0  | 0  | 0  | 0  | 0  | 0  | 0  |
| Den_sund | G | 0   | 0   | 0  | 0  | 0  | 0  | 0  | 0  | 0  | 0  | 0  |
| Dia_moni | G | 206 | 170 | 57 | 33 | 40 | 5  | 30 | 47 | 13 | 81 | 8  |
| Dia_tenu | G | 0   | 4   | 2  | 0  | 1  | 4  | 6  | 8  | 26 | 88 | 53 |
| Dia_vulg | G | 45  | 17  | 9  | 0  | 2  | 0  | 0  | 2  | 6  | 15 | 15 |
| Dip_domb | G | 0   | 0   | 0  | 0  | 0  | 0  | 0  | 0  | 0  | 0  | 0  |
| Dip_smit | G | 0   | 0   | 0  | 0  | 0  | 0  | 0  | 0  | 0  | 0  | 0  |
| Dip_smpu | G | 0   | 0   | 0  | 0  | 0  | 0  | 0  | 0  | 0  | 0  | 0  |
| Dip_smrh | G | 0   | 0   | 0  | 0  | 0  | 0  | 0  | 0  | 0  | 0  | 0  |
| Enc_caes | G | 0   | 0   | 0  | 0  | 0  | 0  | 0  | 0  | 0  | 0  | 0  |
| Enc_lacu | G | 0   | 0   | 0  | 0  | 0  | 0  | 0  | 0  | 0  | 0  | 0  |
| Enc_sile | G | 0   | 0   | 0  | 0  | 0  | 0  | 0  | 0  | 0  | 0  | 0  |
| Ent_cost | G | 0   | 0   | 0  | 0  | 0  | 2  | 0  | 0  | 0  | 0  | 0  |
| Ent_giga | G | 0   | 0   | 0  | 0  | 0  | 0  | 0  | 0  | 1  | 0  | 0  |
| Ent_palu | G | 2   | 5   | 10 | 6  | 10 | 11 | 12 | 9  | 2  | 3  | 1  |
| Ent_pseu | G | 0   | 0   | 0  | 0  | 2  | 1  | 0  | 2  | 0  | 0  | 0  |
| Ent_suri | G | 0   | 0   | 0  | 0  | 0  | 0  | 0  | 0  | 0  | 0  | 0  |
| Epi_adna | G | 0   | 0   | 0  | 0  | 1  | 2  | 2  | 0  | 0  | 0  | 0  |
| Epi_sore | G | 0   | 0   | 0  | 4  | 3  | 10 | 9  | 1  | 2  | 4  | 2  |
| Epi_tuwe | G | 0   | 0   | 0  | 0  | 0  | 0  | 4  | 0  | 2  | 0  | 0  |
| Fal_cryp | G | 0   | 2   | 0  | 2  | 4  | 1  | 0  | 1  | 0  | 2  | 3  |
| Fal_psli | G | 0   | 0   | 0  | 0  | 0  | 0  | 0  | 0  | 0  | 0  | 0  |
| Fal_pygm | G | 0   | 0   | 0  | 0  | 0  | 0  | 0  | 0  | 0  | 0  | 0  |
| Fra_amic | G | 5   | 12  | 14 | 26 | 11 | 20 | 8  | 16 | 11 | 5  | 13 |
| Fra_cava | G | 0   | 0   | 0  | 0  | 0  | 0  | 0  | 0  | 0  | 0  | 0  |
| Fra_cons | G | 0   | 2   | 0  | 0  | 3  | 0  | 0  | 2  | 0  | 0  | 2  |
| Fra_hydu | G | 0   | 0   | 0  | 0  | 0  | 0  | 0  | 0  | 0  | 0  | 0  |
| Fra_stri | G | 0   | 0   | 0  | 4  | 1  | 2  | 0  | 2  | 0  | 0  | 0  |
| Frp_cyli | G | 0   | 0   | 0  | 0  | 0  | 0  | 0  | 0  | 0  | 0  | 2  |
| Fru_creu | G | 0   | 0   | 0  | 0  | 0  | 0  | 0  | 0  | 0  | 0  | 0  |
| Gom_oliv | G | 102 | 2   | 6  | 3  | 1  | 0  | 0  | 2  | 3  | 0  | 2  |
| Gom_parv | G | 0   | 0   | 0  | 0  | 0  | 0  | 0  | 0  | 0  | 0  | 0  |
| Gon_exig | G | 0   | 0   | 0  | 0  | 0  | 0  | 0  | 0  | 0  | 0  | 0  |
| Gos_pseu | G | 0   | 1   | 1  | 2  | 0  | 0  | 1  | 0  | 4  | 0  | 0  |
| Gra_ocea | G | 0   | 0   | 0  | 0  | 0  | 0  | 0  | 0  | 0  | 0  | 0  |
| Gyr_exim | G | 0   | 0   | 0  | 0  | 0  | 0  | 0  | 0  | 0  | 0  | 0  |
| Gyr_fasc | G | 0   | 0   | 0  | 0  | 0  | 0  | 0  | 0  | 0  | 0  | 0  |
| Hal_acut | G | 0   | 0   | 2  | 3  | 0  | 10 | 1  | 0  | 0  | 0  | 0  |
| Hal_coff | G | 2   | 0   | 3  | 5  | 13 | 11 | 4  | 3  | 2  | 0  | 0  |
| Hal_exig | G | 0   | 0   | 0  | 0  | 3  | 0  | 0  | 1  | 0  | 0  | 0  |
| Hal_hols | G | 0   | 0   | 0  | 0  | 0  | 0  | 0  | 0  | 0  | 0  | 0  |
| Hal_hybr | G | 0   | 0   | 0  | 0  | 0  | 0  | 0  | 0  | 0  | 0  | 0  |
| Hal_luci | G | 0   | 0   | 0  | 0  | 0  | 0  | 0  | 0  | 0  | 0  | 0  |
| Hal_subh | G | 0   | 0   | 0  | 0  | 0  | 0  | 1  | 2  | 0  | 0  | 2  |
| Hal_tene | G | 0   | 0   | 1  | 2  | 7  | 0  | 5  | 0  | 0  | 0  | 0  |
| Hal_vene | G | 0   | 0   | 0  | 0  | 0  | 0  | 0  | 0  | 0  | 0  | 0  |
| Has_spic | G | 0   | 2   | 2  | 0  | 2  | 3  | 5  | 8  | 0  | 2  | 2  |
| Hip_hung | G | 0   | 0   | 0  | 2  | 0  | 0  | 0  | 0  | 0  | 0  | 0  |
| Hip_lesm | G | 0   | 0   | 0  | 0  | 0  | 0  | 0  | 0  | 0  | 0  | 0  |
| Hya_scot | G | 0   | 0   | 0  | 0  | 0  | 1  | 0  | 0  | 0  | 0  | 1  |
| Kar_amo  | G | 0   | 0   | 0  | 0  | 0  | 0  | 0  | 0  | 0  | 0  | 0  |
| Kar_clev | G | 0   | 0   | 1  | 4  | 3  | 4  | 2  | 2  | 0  | 0  | 0  |
| Lic_comm | G | 0   | 0   | 0  | 0  | 0  | 0  | 0  | 0  | 0  | 0  | 0  |
| Lic_debi | G | 0   | 0   | 0  | 0  | 0  | 2  | 17 | 1  | 4  | 15 | 21 |
| Lic_gran | G | 2   | 0   | 0  | 0  | 0  | 0  | 0  | 0  | 0  | 0  | 2  |
| Lic_rhom | G | 0   | 0   | 0  | 0  | 0  | 0  | 0  | 0  | 0  | 0  | 1  |
| Lun_bise | G | 38  | 16  | 39 | 25 | 24 | 32 | 13 | 12 | 2  | 4  | 19 |
| Lut_muti | G | 0   | 0   | 0  | 0  | 1  | 0  | 0  | 1  | 0  | 4  | 0  |
| Mar_atom | G | 10  | 33  | 32 | 61 | 49 | 72 | 54 | 42 | 25 | 19 | 38 |
| Mar_schu | G | 0   | 0   | 0  | 0  | 0  | 0  | 0  | 0  | 0  | 0  | 0  |
| Mas_balt | G | 0   | 0   | 0  | 0  | 0  | 0  | 0  | 0  | 0  | 0  | 0  |
| Mas_brau | G | 0   | 0   | 0  | 0  | 0  | 0  | 0  | 0  | 0  | 0  | 0  |
| Mas_elli | G | 0   | 0   | 0  | 0  | 0  | 0  | 2  | 0  | 0  | 0  | 0  |

|          |   |     |    |     |    |    |    |    |     |     |     |     |
|----------|---|-----|----|-----|----|----|----|----|-----|-----|-----|-----|
| Mas_exig | G | 0   | 0  | 0   | 0  | 0  | 0  | 0  | 0   | 0   | 0   | 0   |
| Mas_pumi | G | 0   | 0  | 0   | 0  | 0  | 0  | 0  | 0   | 0   | 0   | 0   |
| Mas_smit | G | 0   | 0  | 6   | 2  | 2  | 21 | 18 | 5   | 2   | 2   | 25  |
| May_atom | G | 0   | 0  | 0   | 0  | 0  | 0  | 0  | 0   | 0   | 0   | 0   |
| Mel_arct | G | 4   | 1  | 0   | 0  | 0  | 0  | 0  | 0   | 0   | 0   | 0   |
| Mel_line | G | 0   | 8  | 14  | 45 | 7  | 12 | 29 | 2   | 4   | 3   | 16  |
| Mel_moni | G | 0   | 0  | 0   | 1  | 2  | 9  | 1  | 1   | 0   | 0   | 21  |
| Mel_numm | G | 0   | 0  | 0   | 0  | 0  | 0  | 0  | 0   | 0   | 0   | 0   |
| Mel_spec | G | 4   | 3  | 11  | 0  | 20 | 12 | 41 | 119 | 202 | 265 | 117 |
| Nav_aren | G | 0   | 0  | 0   | 0  | 0  | 0  | 0  | 0   | 0   | 0   | 0   |
| Nav_brem | G | 0   | 1  | 2   | 0  | 1  | 0  | 2  | 0   | 0   | 0   | 0   |
| Nav_cinc | G | 0   | 0  | 0   | 0  | 0  | 0  | 0  | 0   | 0   | 0   | 0   |
| Nav_clem | G | 0   | 0  | 0   | 0  | 0  | 0  | 0  | 1   | 0   | 0   | 0   |
| Nav_cryp | G | 0   | 0  | 0   | 0  | 0  | 2  | 0  | 0   | 0   | 0   | 0   |
| Nav_digi | G | 0   | 0  | 0   | 0  | 0  | 0  | 0  | 0   | 0   | 0   | 0   |
| Nav_duer | G | 0   | 0  | 2   | 0  | 9  | 11 | 5  | 5   | 2   | 1   | 2   |
| Nav_flan | G | 0   | 0  | 0   | 0  | 0  | 0  | 0  | 0   | 0   | 0   | 0   |
| Nav_greg | G | 6   | 6  | 5   | 7  | 3  | 7  | 5  | 3   | 10  | 2   | 1   |
| Nav_infi | G | 0   | 1  | 2   | 3  | 0  | 20 | 38 | 18  | 4   | 6   | 9   |
| Nav_lanc | G | 0   | 0  | 2   | 2  | 0  | 0  | 1  | 0   | 6   | 2   | 0   |
| Nav_meni | G | 0   | 0  | 0   | 0  | 0  | 0  | 0  | 0   | 0   | 0   | 0   |
| Nav_nole | G | 0   | 0  | 0   | 0  | 0  | 0  | 0  | 0   | 0   | 0   | 0   |
| Nav_pere | G | 0   | 0  | 0   | 0  | 0  | 0  | 0  | 0   | 0   | 0   | 0   |
| Nav_perm | G | 39  | 67 | 41  | 22 | 44 | 20 | 27 | 28  | 49  | 37  | 9   |
| Nav_phyl | G | 0   | 3  | 6   | 10 | 2  | 4  | 6  | 2   | 7   | 0   | 4   |
| Nav_rato | G | 0   | 0  | 0   | 0  | 4  | 0  | 0  | 4   | 1   | 1   | 0   |
| Nav_rhyn | G | 0   | 2  | 1   | 0  | 0  | 0  | 0  | 0   | 0   | 0   | 0   |
| Nav_saco | G | 0   | 0  | 0   | 1  | 0  | 2  | 0  | 1   | 0   | 0   | 0   |
| Nav_sana | G | 0   | 0  | 0   | 0  | 0  | 0  | 0  | 0   | 0   | 0   | 0   |
| Nav_sjoe | G | 10  | 1  | 2   | 0  | 1  | 0  | 0  | 0   | 1   | 0   | 0   |
| Nav_supr | G | 0   | 0  | 0   | 0  | 0  | 3  | 2  | 2   | 0   | 0   | 0   |
| Nav_trip | G | 0   | 0  | 0   | 0  | 0  | 0  | 1  | 0   | 0   | 0   | 0   |
| Nav_vene | G | 0   | 0  | 0   | 0  | 0  | 0  | 0  | 0   | 0   | 0   | 3   |
| Ncy_pusi | G | 0   | 0  | 0   | 0  | 0  | 0  | 0  | 0   | 0   | 1   | 0   |
| Nit_amph | G | 0   | 2  | 0   | 0  | 0  | 0  | 2  | 0   | 0   | 0   | 0   |
| Nit_anla | G | 1   | 0  | 0   | 0  | 2  | 0  | 0  | 0   | 2   | 2   | 0   |
| Nit_aura | G | 0   | 0  | 0   | 0  | 2  | 0  | 0  | 2   | 0   | 0   | 0   |
| Nit_brev | G | 0   | 0  | 0   | 0  | 0  | 0  | 0  | 0   | 0   | 0   | 0   |
| Nit_comm | G | 0   | 0  | 0   | 0  | 0  | 0  | 0  | 0   | 0   | 0   | 0   |
| Nit_diss | G | 1   | 0  | 0   | 0  | 2  | 3  | 0  | 0   | 0   | 0   | 2   |
| Nit_dubi | G | 0   | 0  | 0   | 0  | 0  | 0  | 0  | 0   | 0   | 0   | 0   |
| Nit_eleg | G | 0   | 0  | 0   | 0  | 0  | 0  | 0  | 0   | 0   | 0   | 0   |
| Nit_fili | G | 0   | 0  | 0   | 0  | 4  | 2  | 0  | 6   | 0   | 0   | 2   |
| Nit_flex | G | 0   | 0  | 2   | 0  | 0  | 0  | 0  | 0   | 0   | 0   | 0   |
| Nit_frus | G | 142 | 60 | 151 | 46 | 78 | 47 | 55 | 75  | 47  | 25  | 54  |
| Nit_gand | G | 4   | 0  | 0   | 0  | 0  | 0  | 0  | 0   | 0   | 0   | 0   |
| Nit_heuf | G | 0   | 0  | 0   | 0  | 0  | 0  | 0  | 0   | 0   | 0   | 0   |
| Nit_inco | G | 0   | 0  | 0   | 0  | 6  | 0  | 0  | 0   | 0   | 0   | 0   |
| Nit_lieb | G | 0   | 6  | 2   | 0  | 0  | 2  | 11 | 4   | 0   | 0   | 2   |
| Nit_lisu | G | 0   | 0  | 0   | 0  | 0  | 0  | 2  | 0   | 0   | 0   | 0   |
| Nit_lore | G | 0   | 0  | 0   | 0  | 0  | 0  | 0  | 0   | 0   | 0   | 0   |
| Nit_micr | G | 0   | 6  | 7   | 5  | 17 | 9  | 6  | 5   | 0   | 0   | 2   |
| Nit_pale | G | 0   | 0  | 3   | 0  | 5  | 1  | 2  | 2   | 0   | 0   | 4   |
| Nit_pate | G | 0   | 0  | 0   | 0  | 2  | 0  | 0  | 0   | 0   | 0   | 0   |
| Nit_pcea | G | 1   | 29 | 52  | 34 | 24 | 2  | 11 | 16  | 11  | 4   | 6   |
| Nit_pell | G | 0   | 0  | 5   | 8  | 12 | 0  | 4  | 8   | 11  | 29  | 1   |
| Nit_perm | G | 0   | 0  | 2   | 2  | 0  | 0  | 0  | 0   | 0   | 0   | 0   |
| Nit_pusi | G | 0   | 0  | 0   | 11 | 1  | 0  | 4  | 0   | 0   | 0   | 2   |
| Nit_reve | G | 0   | 0  | 0   | 0  | 0  | 0  | 2  | 4   | 0   | 0   | 0   |
| Nit_rose | G | 8   | 21 | 19  | 56 | 27 | 31 | 41 | 46  | 22  | 21  | 15  |
| Nit_sdea | G | 0   | 0  | 0   | 0  | 0  | 0  | 0  | 0   | 0   | 0   | 0   |
| Nit_sigm | G | 0   | 0  | 0   | 0  | 0  | 0  | 0  | 0   | 2   | 0   | 2   |
| Nit_soci | G | 0   | 0  | 0   | 0  | 0  | 0  | 1  | 0   | 0   | 0   | 0   |
| Nit_subc | G | 0   | 0  | 0   | 0  | 0  | 0  | 0  | 0   | 0   | 0   | 0   |
| Nit_supr | G | 0   | 0  | 4   | 7  | 1  | 2  | 3  | 0   | 0   | 0   | 0   |
| Nit_ther | G | 5   | 2  | 6   | 7  | 18 | 8  | 10 | 7   | 4   | 2   | 2   |
| Nit_vald | G | 0   | 2  | 3   | 2  | 2  | 5  | 4  | 2   | 0   | 2   | 4   |
| Ope_muta | G | 5   | 4  | 30  | 70 | 44 | 64 | 27 | 34  | 13  | 19  | 31  |
| Pau_tae  | G | 4   | 2  | 5   | 0  | 1  | 0  | 2  | 3   | 6   | 3   | 0   |
| Pin_eleg | G | 0   | 0  | 0   | 0  | 0  | 0  | 0  | 0   | 0   | 0   | 0   |
| Pin_kroc | G | 0   | 0  | 0   | 0  | 0  | 0  | 0  | 0   | 0   | 0   | 0   |
| Pin_micr | G | 0   | 0  | 0   | 0  | 0  | 0  | 0  | 0   | 0   | 0   | 0   |
| Ple_elon | G | 0   | 0  | 0   | 0  | 0  | 0  | 0  | 0   | 0   | 0   | 0   |
| Ple_sali | G | 0   | 0  | 0   | 0  | 0  | 0  | 0  | 0   | 0   | 0   | 0   |
| Plt_deli | G | 1   | 0  | 3   | 2  | 2  | 0  | 3  | 0   | 1   | 1   | 1   |









|           |   |    |    |    |     |    |     |    |    |     |    |     |
|-----------|---|----|----|----|-----|----|-----|----|----|-----|----|-----|
| Pin_kroc  | H | 0  | 0  | 0  | 0   | 0  | 0   | 0  | 0  | 0   | 0  | 0   |
| Pin_micr  | H | 0  | 0  | 0  | 0   | 0  | 0   | 0  | 0  | 0   | 0  | 0   |
| Ple_elon  | H | 0  | 0  | 0  | 0   | 0  | 0   | 0  | 0  | 0   | 0  | 0   |
| Ple_sali  | H | 0  | 0  | 0  | 0   | 0  | 0   | 0  | 0  | 0   | 0  | 0   |
| Plt_deli  | H | 0  | 1  | 0  | 0   | 0  | 0   | 2  | 0  | 0   | 0  | 0   |
| Plt_disp  | H | 0  | 0  | 0  | 0   | 0  | 0   | 0  | 0  | 0   | 0  | 0   |
| Plt_freq  | H | 0  | 0  | 0  | 0   | 0  | 0   | 0  | 0  | 0   | 0  | 0   |
| Plt_hauc  | H | 0  | 0  | 1  | 4   | 2  | 0   | 4  | 1  | 4   | 0  | 4   |
| Plt_lemm  | H | 0  | 0  | 0  | 0   | 1  | 0   | 0  | 0  | 0   | 2  | 0   |
| Plt_sept  | H | 0  | 0  | 0  | 0   | 0  | 0   | 0  | 0  | 0   | 0  | 0   |
| Pro_buln  | H | 0  | 0  | 0  | 0   | 0  | 0   | 0  | 0  | 0   | 0  | 0   |
| Pse_west  | H | 0  | 0  | 0  | 0   | 0  | 0   | 0  | 0  | 0   | 0  | 0   |
| Psf_tene  | H | 0  | 0  | 0  | 0   | 0  | 0   | 0  | 0  | 0   | 0  | 0   |
| Pss_brev  | H | 0  | 0  | 0  | 5   | 6  | 0   | 1  | 3  | 3   | 0  | 0   |
| Pss_elli  | H | 38 | 70 | 35 | 177 | 85 | 19  | 42 | 84 | 34  | 39 | 35  |
| Pss_zeil  | H | 13 | 7  | 1  | 43  | 15 | 4   | 6  | 12 | 0   | 0  | 13  |
| Pst_punc  | H | 0  | 0  | 2  | 0   | 1  | 0   | 0  | 0  | 2   | 0  | 0   |
| Ptd_gemm  | H | 0  | 0  | 0  | 0   | 0  | 0   | 0  | 0  | 0   | 0  | 0   |
| Rei_sinu  | H | 0  | 0  | 0  | 0   | 0  | 0   | 0  | 0  | 0   | 0  | 0   |
| Rho_abbr  | H | 53 | 19 | 88 | 71  | 38 | 321 | 98 | 49 | 116 | 70 | 130 |
| Rhp_gibb  | H | 0  | 0  | 2  | 4   | 0  | 6   | 0  | 1  | 0   | 1  | 0   |
| Rhp_gipa  | H | 0  | 0  | 0  | 0   | 0  | 0   | 0  | 0  | 0   | 0  | 0   |
| Sel_pupu  | H | 0  | 0  | 0  | 0   | 0  | 0   | 0  | 0  | 0   | 0  | 0   |
| Ske_cost  | H | 10 | 2  | 0  | 0   | 1  | 0   | 0  | 0  | 0   | 0  | 0   |
| Std_hant  | H | 0  | 0  | 0  | 0   | 0  | 0   | 0  | 0  | 0   | 0  | 0   |
| Std_minu  | H | 0  | 0  | 0  | 0   | 0  | 0   | 0  | 0  | 0   | 0  | 0   |
| Stn_simu  | H | 0  | 0  | 0  | 0   | 0  | 0   | 0  | 0  | 0   | 0  | 0   |
| Sur_breb  | H | 0  | 3  | 0  | 0   | 1  | 0   | 0  | 0  | 1   | 0  | 0   |
| Syn_acus  | H | 0  | 0  | 0  | 0   | 0  | 0   | 0  | 0  | 0   | 0  | 0   |
| Tab_fasc  | H | 7  | 0  | 8  | 18  | 21 | 76  | 40 | 24 | 23  | 57 | 56  |
| Tab_tabu  | H | 0  | 0  | 0  | 0   | 3  | 29  | 8  | 2  | 5   | 2  | 11  |
| Tab_waer  | H | 0  | 0  | 0  | 0   | 0  | 0   | 0  | 0  | 0   | 1  | 0   |
| Tal_fene  | H | 0  | 0  | 0  | 0   | 0  | 0   | 0  | 0  | 0   | 0  | 0   |
| Tal_floc  | H | 0  | 0  | 0  | 0   | 0  | 0   | 0  | 0  | 0   | 0  | 0   |
| Tha_balt  | H | 3  | 0  | 0  | 1   | 0  | 0   | 0  | 1  | 0   | 0  | 0   |
| Tha_leva  | H | 1  | 0  | 0  | 0   | 1  | 0   | 0  | 0  | 0   | 0  | 0   |
| Tha_pros  | H | 0  | 0  | 0  | 0   | 0  | 0   | 0  | 2  | 7   | 0  | 2   |
| Tha_pseu  | H | 0  | 0  | 0  | 0   | 2  | 2   | 0  | 2  | 0   | 0  | 0   |
| Tro_dann  | H | 0  | 0  | 0  | 0   | 0  | 0   | 0  | 0  | 0   | 0  | 0   |
| Try_angu  | H | 0  | 0  | 0  | 0   | 0  | 0   | 0  | 0  | 0   | 0  | 0   |
| Try_apic  | H | 0  | 0  | 0  | 0   | 0  | 0   | 0  | 2  | 0   | 0  | 0   |
| Try_ardu  | H | 0  | 0  | 0  | 0   | 0  | 0   | 0  | 0  | 0   | 0  | 0   |
| Try_hung  | H | 0  | 0  | 0  | 0   | 0  | 0   | 0  | 0  | 0   | 0  | 0   |
| Try_levi  | H | 0  | 0  | 0  | 0   | 0  | 1   | 0  | 2  | 0   | 0  | 0   |
| Acd_minu  | I | 9  | 10 | 32 | 29  | 0  | 4   | 6  | 2  | 4   | 2  | 3   |
| Acd_pyre  | I | 2  | 0  | 0  | 0   | 0  | 0   | 0  | 1  | 0   | 0  | 0   |
| Acd_suba  | I | 0  | 0  | 0  | 0   | 0  | 0   | 0  | 0  | 0   | 1  | 0   |
| Ach_bica  | I | 0  | 0  | 0  | 0   | 0  | 0   | 0  | 0  | 0   | 0  | 0   |
| Ach_brev  | I | 0  | 0  | 0  | 0   | 0  | 0   | 0  | 0  | 0   | 0  | 0   |
| Ach_brin  | I | 0  | 2  | 0  | 0   | 0  | 4   | 2  | 2  | 18  | 0  | 3   |
| Ach_long  | I | 0  | 0  | 0  | 0   | 0  | 0   | 0  | 0  | 0   | 0  | 0   |
| Ach_misc  | I | 0  | 4  | 4  | 1   | 2  | 0   | 0  | 6  | 14  | 10 | 3   |
| Ach_vist  | I | 0  | 0  | 2  | 0   | 0  | 0   | 0  | 1  | 0   | 1  | 0   |
| Act_occrr | I | 0  | 0  | 0  | 0   | 0  | 0   | 1  | 0  | 2   | 0  | 0   |
| Amp_comm  | I | 0  | 0  | 0  | 0   | 0  | 0   | 0  | 0  | 0   | 0  | 0   |
| Amp_copu  | I | 0  | 0  | 0  | 0   | 0  | 0   | 0  | 1  | 0   | 0  | 0   |
| Amp_fleb  | I | 10 | 7  | 14 | 9   | 53 | 41  | 8  | 9  | 9   | 19 | 14  |
| Amp_inar  | I | 0  | 0  | 0  | 0   | 0  | 0   | 0  | 0  | 0   | 0  | 0   |
| Amp_line  | I | 0  | 2  | 0  | 3   | 2  | 2   | 0  | 0  | 0   | 0  | 0   |
| Amp_micr  | I | 0  | 0  | 0  | 0   | 0  | 0   | 0  | 0  | 0   | 0  | 0   |
| Amp_oval  | I | 0  | 0  | 0  | 0   | 0  | 0   | 0  | 0  | 0   | 0  | 0   |
| Amp_pedi  | I | 6  | 6  | 1  | 3   | 4  | 9   | 1  | 4  | 6   | 2  | 6   |
| Amp_stau  | I | 0  | 0  | 0  | 0   | 0  | 0   | 0  | 0  | 0   | 0  | 0   |
| Ane_tusc  | I | 0  | 0  | 0  | 0   | 0  | 0   | 0  | 0  | 0   | 0  | 0   |
| Asa_bahu  | I | 0  | 0  | 0  | 0   | 0  | 0   | 0  | 0  | 0   | 0  | 0   |
| Ast_form  | I | 0  | 0  | 0  | 0   | 0  | 0   | 0  | 0  | 0   | 0  | 0   |
| Aul_spp   | I | 0  | 0  | 0  | 0   | 0  | 0   | 0  | 0  | 0   | 0  | 2   |
| Bac_paxi  | I | 3  | 0  | 0  | 4   | 20 | 10  | 9  | 42 | 53  | 43 | 23  |
| Ber_ruti  | I | 93 | 12 | 4  | 15  | 6  | 54  | 13 | 39 | 13  | 10 | 3   |
| Bra_apon  | I | 0  | 0  | 0  | 0   | 0  | 0   | 0  | 0  | 0   | 0  | 0   |
| Bre_lanc  | I | 0  | 0  | 0  | 0   | 0  | 0   | 2  | 0  | 0   | 0  | 0   |
| Cal_baci  | I | 0  | 0  | 2  | 0   | 0  | 0   | 0  | 0  | 2   | 0  | 0   |
| Cer_clos  | I | 2  | 0  | 0  | 12  | 0  | 0   | 1  | 2  | 12  | 4  | 0   |
| Cha_spp   | I | 4  | 1  | 1  | 1   | 10 | 0   | 2  | 2  | 2   | 2  | 4   |
| Chp_marg  | I | 0  | 1  | 0  | 2   | 0  | 0   | 0  | 0  | 0   | 0  | 0   |



|          |  |    |     |    |     |     |    |    |    |     |     |     |
|----------|--|----|-----|----|-----|-----|----|----|----|-----|-----|-----|
| Lic_debi |  | 0  | 0   | 0  | 0   | 2   | 0  | 1  | 2  | 2   | 2   | 0   |
| Lic_gran |  | 0  | 0   | 0  | 0   | 0   | 0  | 0  | 0  | 0   | 0   | 0   |
| Lic_rhom |  | 0  | 0   | 0  | 0   | 0   | 0  | 0  | 0  | 0   | 0   | 0   |
| Lun_bise |  | 6  | 6   | 0  | 0   | 0   | 13 | 7  | 0  | 2   | 10  | 4   |
| Lut_muti |  | 0  | 0   | 0  | 0   | 0   | 0  | 0  | 0  | 0   | 0   | 0   |
| Mar_atom |  | 44 | 23  | 51 | 32  | 21  | 35 | 25 | 32 | 19  | 23  | 15  |
| Mar_schu |  | 2  | 0   | 1  | 0   | 2   | 2  | 0  | 1  | 0   | 0   | 0   |
| Mas_balt |  | 0  | 0   | 0  | 0   | 0   | 0  | 0  | 0  | 0   | 0   | 0   |
| Mas_brau |  | 0  | 0   | 0  | 0   | 2   | 4  | 4  | 6  | 2   | 0   | 0   |
| Mas_elli |  | 0  | 1   | 2  | 0   | 5   | 4  | 9  | 3  | 3   | 0   | 2   |
| Mas_exig |  | 0  | 0   | 0  | 0   | 2   | 9  | 0  | 0  | 0   | 0   | 0   |
| Mas_pumi |  | 0  | 0   | 4  | 4   | 69  | 89 | 44 | 29 | 20  | 0   | 2   |
| Mas_smit |  | 8  | 1   | 13 | 3   | 48  | 50 | 38 | 40 | 23  | 0   | 2   |
| May_atom |  | 0  | 0   | 0  | 0   | 0   | 0  | 0  | 0  | 0   | 0   | 0   |
| Mel_arct |  | 0  | 0   | 0  | 0   | 0   | 0  | 0  | 0  | 0   | 0   | 0   |
| Mel_line |  | 0  | 0   | 0  | 0   | 0   | 0  | 0  | 0  | 1   | 0   | 4   |
| Mel_moni |  | 6  | 11  | 1  | 0   | 0   | 0  | 0  | 0  | 1   | 1   | 11  |
| Mel_numm |  | 2  | 1   | 0  | 2   | 0   | 0  | 0  | 0  | 0   | 0   | 0   |
| Mel_spec |  | 53 | 23  | 4  | 51  | 122 | 5  | 25 | 34 | 65  | 496 | 312 |
| Nav_aren |  | 0  | 0   | 0  | 0   | 0   | 0  | 0  | 0  | 0   | 0   | 0   |
| Nav_brem |  | 0  | 2   | 0  | 0   | 0   | 0  | 1  | 1  | 2   | 0   | 0   |
| Nav_cinc |  | 0  | 0   | 0  | 0   | 0   | 0  | 0  | 0  | 0   | 0   | 0   |
| Nav_clem |  | 0  | 0   | 0  | 0   | 0   | 0  | 0  | 0  | 0   | 0   | 0   |
| Nav_cryp |  | 0  | 4   | 0  | 0   | 0   | 0  | 0  | 1  | 1   | 0   | 0   |
| Nav_digi |  | 2  | 0   | 0  | 0   | 0   | 0  | 0  | 0  | 0   | 0   | 0   |
| Nav_duer |  | 2  | 1   | 1  | 2   | 4   | 0  | 9  | 13 | 31  | 8   | 5   |
| Nav_flan |  | 2  | 0   | 0  | 0   | 0   | 1  | 0  | 0  | 0   | 0   | 0   |
| Nav_greg |  | 9  | 26  | 4  | 14  | 9   | 8  | 5  | 1  | 0   | 2   | 5   |
| Nav_infi |  | 0  | 0   | 2  | 0   | 0   | 0  | 0  | 0  | 0   | 0   | 0   |
| Nav_lanc |  | 0  | 0   | 0  | 0   | 0   | 0  | 0  | 1  | 1   | 0   | 0   |
| Nav_meni |  | 0  | 0   | 0  | 0   | 0   | 0  | 0  | 0  | 0   | 0   | 0   |
| Nav_nole |  | 0  | 0   | 0  | 0   | 0   | 0  | 0  | 0  | 0   | 0   | 0   |
| Nav_pere |  | 0  | 0   | 3  | 0   | 0   | 2  | 1  | 0  | 0   | 0   | 0   |
| Nav_perm |  | 29 | 39  | 26 | 20  | 14  | 0  | 18 | 64 | 153 | 42  | 97  |
| Nav_phyl |  | 10 | 12  | 5  | 2   | 3   | 15 | 7  | 2  | 0   | 0   | 0   |
| Nav_rato |  | 0  | 0   | 2  | 2   | 0   | 0  | 0  | 0  | 2   | 0   | 0   |
| Nav_rhyn |  | 1  | 0   | 0  | 0   | 0   | 0  | 0  | 0  | 0   | 0   | 0   |
| Nav_saco |  | 0  | 0   | 0  | 0   | 0   | 0  | 0  | 0  | 0   | 0   | 0   |
| Nav_sana |  | 0  | 2   | 0  | 0   | 2   | 2  | 0  | 0  | 0   | 0   | 0   |
| Nav_sjoe |  | 0  | 0   | 0  | 0   | 0   | 0  | 0  | 0  | 0   | 0   | 0   |
| Nav_supr |  | 0  | 0   | 0  | 1   | 0   | 0  | 0  | 0  | 0   | 0   | 0   |
| Nav_trip |  | 0  | 0   | 0  | 0   | 0   | 0  | 0  | 0  | 0   | 0   | 0   |
| Nav_vene |  | 0  | 0   | 0  | 0   | 0   | 2  | 2  | 0  | 0   | 0   | 0   |
| Ncy_pusi |  | 2  | 0   | 6  | 2   | 4   | 0  | 2  | 3  | 4   | 0   | 2   |
| Nit_amph |  | 0  | 0   | 2  | 0   | 0   | 0  | 0  | 1  | 0   | 0   | 0   |
| Nit_anla |  | 4  | 3   | 2  | 1   | 0   | 0  | 0  | 0  | 0   | 0   | 0   |
| Nit_aura |  | 0  | 0   | 0  | 2   | 0   | 0  | 0  | 0  | 0   | 0   | 0   |
| Nit_brev |  | 0  | 0   | 0  | 2   | 3   | 5  | 3  | 2  | 0   | 0   | 1   |
| Nit_comm |  | 0  | 0   | 0  | 0   | 0   | 0  | 0  | 0  | 0   | 0   | 0   |
| Nit_diss |  | 2  | 0   | 0  | 0   | 0   | 0  | 0  | 0  | 0   | 0   | 0   |
| Nit_dubi |  | 2  | 0   | 0  | 0   | 0   | 0  | 0  | 0  | 0   | 0   | 0   |
| Nit_eleg |  | 0  | 0   | 2  | 0   | 0   | 1  | 3  | 2  | 0   | 0   | 1   |
| Nit_fili |  | 0  | 0   | 0  | 3   | 1   | 0  | 0  | 2  | 0   | 4   | 0   |
| Nit_flex |  | 0  | 0   | 0  | 0   | 0   | 0  | 0  | 0  | 0   | 0   | 0   |
| Nit_frus |  | 28 | 260 | 51 | 252 | 32  | 55 | 27 | 30 | 57  | 15  | 93  |
| Nit_gand |  | 0  | 0   | 0  | 0   | 0   | 0  | 0  | 0  | 0   | 0   | 0   |
| Nit_heuf |  | 0  | 0   | 0  | 0   | 0   | 0  | 0  | 0  | 0   | 0   | 0   |
| Nit_inco |  | 0  | 0   | 0  | 0   | 0   | 0  | 0  | 0  | 0   | 0   | 1   |
| Nit_lieb |  | 2  | 0   | 0  | 0   | 2   | 0  | 4  | 19 | 23  | 2   | 2   |
| Nit_lisu |  | 0  | 0   | 0  | 0   | 0   | 0  | 0  | 2  | 0   | 0   | 0   |
| Nit_lore |  | 0  | 0   | 0  | 0   | 0   | 0  | 0  | 0  | 0   | 0   | 0   |
| Nit_micr |  | 34 | 19  | 50 | 29  | 95  | 26 | 77 | 56 | 74  | 22  | 60  |
| Nit_pale |  | 2  | 0   | 1  | 2   | 6   | 0  | 0  | 1  | 0   | 2   | 0   |
| Nit_pate |  | 0  | 0   | 6  | 2   | 17  | 15 | 6  | 3  | 5   | 1   | 2   |
| Nit_pcea |  | 7  | 4   | 8  | 46  | 22  | 8  | 31 | 8  | 2   | 5   | 2   |
| Nit_pell |  | 2  | 0   | 0  | 0   | 0   | 0  | 0  | 0  | 2   | 19  | 2   |
| Nit_perm |  | 0  | 0   | 0  | 0   | 0   | 0  | 0  | 0  | 0   | 0   | 0   |
| Nit_pusi |  | 8  | 4   | 9  | 13  | 49  | 24 | 22 | 43 | 27  | 8   | 0   |
| Nit_reve |  | 0  | 0   | 0  | 0   | 0   | 0  | 0  | 0  | 0   | 0   | 0   |
| Nit_rose |  | 20 | 0   | 6  | 6   | 16  | 7  | 32 | 9  | 42  | 59  | 31  |
| Nit_sdea |  | 0  | 0   | 0  | 0   | 1   | 0  | 0  | 0  | 0   | 0   | 0   |
| Nit_sigm |  | 0  | 0   | 0  | 0   | 1   | 2  | 0  | 0  | 0   | 0   | 0   |
| Nit_soci |  | 0  | 0   | 0  | 0   | 0   | 0  | 0  | 0  | 0   | 0   | 0   |
| Nit_subc |  | 0  | 0   | 0  | 0   | 0   | 0  | 0  | 0  | 0   | 0   | 0   |
| Nit_supr |  | 1  | 2   | 4  | 4   | 2   | 6  | 3  | 0  | 7   | 3   | 0   |

|          |   |     |     |     |     |    |     |     |     |    |    |    |
|----------|---|-----|-----|-----|-----|----|-----|-----|-----|----|----|----|
| Nit_ther | I | 0   | 2   | 0   | 4   | 4  | 0   | 0   | 0   | 0  | 0  | 1  |
| Nit_vald | I | 0   | 10  | 17  | 1   | 4  | 10  | 3   | 4   | 4  | 2  | 4  |
| Ope_muta | I | 61  | 45  | 108 | 25  | 19 | 74  | 82  | 45  | 22 | 3  | 18 |
| Pau_tae  | I | 0   | 0   | 0   | 0   | 0  | 0   | 0   | 0   | 0  | 0  | 0  |
| Pin_eleg | I | 0   | 0   | 0   | 0   | 0  | 0   | 0   | 0   | 0  | 0  | 0  |
| Pin_kroc | I | 0   | 0   | 0   | 2   | 0  | 0   | 0   | 0   | 0  | 0  | 0  |
| Pin_micr | I | 2   | 0   | 0   | 0   | 0  | 0   | 0   | 0   | 0  | 0  | 0  |
| Ple_elon | I | 0   | 0   | 0   | 0   | 0  | 2   | 1   | 0   | 0  | 2  | 0  |
| Ple_sali | I | 0   | 0   | 0   | 0   | 0  | 0   | 0   | 1   | 0  | 0  | 0  |
| Plt_deli | I | 4   | 2   | 0   | 0   | 0  | 2   | 1   | 0   | 1  | 0  | 0  |
| Plt_disp | I | 0   | 0   | 0   | 0   | 0  | 0   | 0   | 0   | 0  | 0  | 0  |
| Plt_freq | I | 0   | 0   | 0   | 0   | 0  | 0   | 0   | 0   | 0  | 0  | 0  |
| Plt_hauc | I | 0   | 4   | 2   | 1   | 0  | 2   | 0   | 8   | 4  | 1  | 1  |
| Plt_lemm | I | 0   | 0   | 1   | 0   | 0  | 0   | 0   | 1   | 0  | 2  | 0  |
| Plt_sept | I | 0   | 0   | 0   | 0   | 0  | 0   | 0   | 0   | 0  | 0  | 0  |
| Pro_buln | I | 2   | 0   | 0   | 0   | 0  | 0   | 6   | 9   | 0  | 0  | 4  |
| Pse_west | I | 0   | 0   | 0   | 0   | 0  | 0   | 0   | 0   | 0  | 0  | 0  |
| Psf_tene | I | 0   | 0   | 0   | 0   | 0  | 0   | 0   | 0   | 0  | 0  | 0  |
| Pss_brev | I | 6   | 2   | 6   | 0   | 0  | 7   | 2   | 8   | 2  | 0  | 2  |
| Pss_elli | I | 160 | 144 | 237 | 38  | 64 | 121 | 138 | 106 | 68 | 41 | 67 |
| Pss_zeil | I | 105 | 104 | 177 | 33  | 38 | 110 | 112 | 120 | 33 | 8  | 43 |
| Pst_punc | I | 0   | 3   | 0   | 1   | 1  | 0   | 0   | 2   | 0  | 0  | 0  |
| Ptd_gemm | I | 0   | 0   | 0   | 0   | 0  | 0   | 0   | 0   | 0  | 0  | 0  |
| Rei_sinu | I | 0   | 0   | 0   | 0   | 0  | 0   | 0   | 1   | 0  | 0  | 0  |
| Rho_abbr | I | 9   | 47  | 5   | 122 | 30 | 7   | 2   | 3   | 5  | 2  | 32 |
| Rhp_gibb | I | 1   | 0   | 5   | 1   | 0  | 6   | 4   | 3   | 0  | 0  | 0  |
| Rhp_gipa | I | 0   | 0   | 0   | 0   | 1  | 3   | 1   | 2   | 0  | 0  | 3  |
| Sel_pupu | I | 0   | 0   | 0   | 4   | 0  | 0   | 0   | 0   | 0  | 0  | 0  |
| Ske_cost | I | 7   | 0   | 0   | 0   | 0  | 0   | 0   | 0   | 0  | 0  | 1  |
| Std_hant | I | 0   | 0   | 0   | 0   | 0  | 0   | 0   | 0   | 0  | 0  | 0  |
| Std_minu | I | 0   | 0   | 0   | 0   | 0  | 0   | 0   | 0   | 0  | 0  | 0  |
| Stn_simu | I | 0   | 0   | 0   | 0   | 0  | 0   | 0   | 0   | 0  | 0  | 0  |
| Sur_breb | I | 1   | 4   | 0   | 0   | 1  | 0   | 0   | 0   | 0  | 4  | 2  |
| Syn_acus | I | 0   | 0   | 0   | 0   | 0  | 0   | 0   | 0   | 0  | 0  | 0  |
| Tab_fasc | I | 21  | 12  | 6   | 6   | 17 | 7   | 23  | 27  | 33 | 35 | 19 |
| Tab_tabu | I | 2   | 0   | 0   | 0   | 0  | 0   | 0   | 0   | 0  | 1  | 2  |
| Tab_waer | I | 0   | 0   | 0   | 0   | 0  | 0   | 0   | 0   | 0  | 0  | 0  |
| Tal_fene | I | 0   | 0   | 0   | 0   | 0  | 0   | 0   | 0   | 0  | 0  | 0  |
| Tal_floc | I | 0   | 0   | 0   | 0   | 0  | 0   | 0   | 0   | 0  | 0  | 0  |
| Tha_balt | I | 0   | 2   | 0   | 0   | 0  | 0   | 0   | 0   | 2  | 3  | 2  |
| Tha_leva | I | 6   | 0   | 0   | 2   | 0  | 0   | 0   | 0   | 0  | 0  | 0  |
| Tha_pros | I | 0   | 0   | 0   | 0   | 0  | 0   | 0   | 2   | 2  | 5  | 2  |
| Tha_pseu | I | 0   | 0   | 0   | 1   | 0  | 0   | 2   | 1   | 0  | 0  | 0  |
| Tro_dann | I | 0   | 0   | 0   | 0   | 0  | 0   | 0   | 0   | 0  | 0  | 0  |
| Try_angu | I | 0   | 0   | 0   | 0   | 0  | 0   | 0   | 0   | 0  | 0  | 0  |
| Try_apic | I | 0   | 0   | 2   | 0   | 0  | 0   | 0   | 2   | 0  | 0  | 1  |
| Try_ardu | I | 0   | 0   | 0   | 0   | 0  | 0   | 0   | 0   | 0  | 0  | 0  |
| Try_hung | I | 0   | 0   | 0   | 0   | 0  | 0   | 0   | 0   | 0  | 0  | 0  |
| Try_levi | I | 0   | 0   | 0   | 0   | 0  | 0   | 0   | 0   | 0  | 0  | 0  |
| Acd_minu | J | 4   | 9   | 0   | 3   | 8  | 8   | 10  | 26  | 8  | 10 | 5  |
| Acd_pyre | J | 0   | 0   | 0   | 0   | 0  | 0   | 0   | 0   | 2  | 0  | 0  |
| Acd_suba | J | 0   | 0   | 0   | 0   | 0  | 0   | 0   | 0   | 0  | 0  | 0  |
| Ach_bica | J | 0   | 0   | 0   | 0   | 0  | 0   | 0   | 0   | 0  | 0  | 0  |
| Ach_brev | J | 0   | 0   | 0   | 0   | 0  | 0   | 0   | 0   | 0  | 0  | 0  |
| Ach_brin | J | 0   | 0   | 0   | 2   | 2  | 1   | 15  | 0   | 0  | 0  | 1  |
| Ach_long | J | 0   | 0   | 0   | 0   | 0  | 0   | 0   | 0   | 0  | 0  | 0  |
| Ach_misc | J | 6   | 2   | 0   | 0   | 0  | 2   | 0   | 0   | 2  | 0  | 0  |
| Ach_vist | J | 0   | 0   | 0   | 0   | 0  | 0   | 0   | 0   | 0  | 0  | 0  |
| Act_occ  | J | 0   | 0   | 0   | 0   | 0  | 0   | 0   | 0   | 0  | 0  | 0  |
| Amp_comm | J | 0   | 0   | 0   | 0   | 0  | 0   | 0   | 0   | 0  | 0  | 0  |
| Amp_copu | J | 0   | 0   | 0   | 0   | 0  | 0   | 0   | 0   | 0  | 0  | 2  |
| Amp_fleb | J | 12  | 6   | 4   | 61  | 7  | 8   | 2   | 5   | 1  | 2  | 1  |
| Amp_inar | J | 0   | 0   | 0   | 0   | 1  | 0   | 0   | 0   | 0  | 0  | 0  |
| Amp_line | J | 0   | 0   | 0   | 2   | 0  | 2   | 0   | 0   | 0  | 0  | 0  |
| Amp_micr | J | 0   | 0   | 0   | 0   | 0  | 0   | 0   | 0   | 0  | 0  | 0  |
| Amp_oval | J | 0   | 0   | 0   | 0   | 0  | 0   | 0   | 0   | 0  | 0  | 0  |
| Amp_pedi | J | 4   | 3   | 6   | 6   | 8  | 1   | 9   | 16  | 13 | 4  | 14 |
| Amp_stau | J | 0   | 0   | 0   | 0   | 0  | 0   | 0   | 0   | 0  | 0  | 0  |
| Ane_tusc | J | 0   | 0   | 0   | 0   | 0  | 0   | 0   | 1   | 0  | 0  | 0  |
| Asa_bahu | J | 0   | 0   | 0   | 0   | 0  | 0   | 0   | 0   | 1  | 0  | 0  |
| Ast_form | J | 0   | 0   | 0   | 0   | 0  | 0   | 0   | 0   | 0  | 0  | 0  |
| Aul_spp  | J | 0   | 0   | 0   | 0   | 0  | 0   | 0   | 0   | 0  | 0  | 0  |
| Bac_paxi | J | 0   | 0   | 0   | 0   | 0  | 0   | 0   | 0   | 0  | 0  | 0  |
| Ber_ruti | J | 0   | 1   | 5   | 13  | 12 | 10  | 4   | 11  | 1  | 0  | 0  |
| Bra_apon | J | 2   | 0   | 0   | 2   | 20 | 14  | 24  | 31  | 34 | 44 | 8  |



|           |   |    |    |    |    |    |     |    |    |    |     |     |
|-----------|---|----|----|----|----|----|-----|----|----|----|-----|-----|
| Hip_lesm  | J | 0  | 0  | 0  | 0  | 2  | 4   | 3  | 6  | 2  | 4   | 11  |
| Hya_scot  | J | 0  | 0  | 0  | 0  | 0  | 0   | 0  | 0  | 0  | 0   | 0   |
| Kar_amoee | J | 0  | 0  | 0  | 0  | 0  | 0   | 0  | 0  | 0  | 0   | 0   |
| Kar_clev  | J | 0  | 0  | 0  | 0  | 0  | 0   | 0  | 0  | 1  | 0   | 0   |
| Lic_comm  | J | 0  | 0  | 0  | 0  | 0  | 0   | 0  | 0  | 3  | 0   | 3   |
| Lic_debi  | J | 0  | 0  | 0  | 1  | 30 | 4   | 3  | 2  | 1  | 0   | 0   |
| Lic_gran  | J | 0  | 0  | 0  | 0  | 0  | 0   | 0  | 0  | 0  | 0   | 2   |
| Lic_rhom  | J | 0  | 0  | 0  | 0  | 0  | 0   | 0  | 0  | 0  | 0   | 0   |
| Lun_bise  | J | 24 | 2  | 5  | 2  | 0  | 1   | 2  | 0  | 0  | 0   | 6   |
| Lut_muti  | J | 0  | 0  | 0  | 0  | 0  | 0   | 0  | 0  | 0  | 0   | 0   |
| Mar_atom  | J | 53 | 40 | 54 | 13 | 26 | 47  | 52 | 20 | 12 | 6   | 37  |
| Mar_schu  | J | 0  | 0  | 2  | 0  | 0  | 0   | 0  | 0  | 0  | 0   | 0   |
| Mas_balt  | J | 0  | 0  | 0  | 0  | 0  | 0   | 0  | 0  | 0  | 0   | 0   |
| Mas_brau  | J | 0  | 0  | 0  | 0  | 0  | 0   | 0  | 0  | 0  | 0   | 2   |
| Mas_elli  | J | 0  | 0  | 0  | 0  | 2  | 0   | 0  | 0  | 0  | 0   | 0   |
| Mas_exig  | J | 0  | 0  | 0  | 0  | 0  | 0   | 0  | 0  | 0  | 0   | 0   |
| Mas_pumi  | J | 1  | 0  | 0  | 2  | 2  | 13  | 5  | 3  | 0  | 0   | 7   |
| Mas_smit  | J | 0  | 3  | 1  | 5  | 8  | 103 | 7  | 7  | 11 | 2   | 7   |
| May_atom  | J | 0  | 0  | 0  | 0  | 0  | 0   | 0  | 0  | 0  | 0   | 0   |
| Mel_arct  | J | 0  | 0  | 0  | 0  | 0  | 0   | 0  | 0  | 0  | 0   | 0   |
| Mel_line  | J | 0  | 0  | 0  | 0  | 0  | 1   | 1  | 2  | 2  | 0   | 0   |
| Mel_moni  | J | 0  | 0  | 0  | 0  | 0  | 0   | 0  | 0  | 0  | 0   | 0   |
| Mel_numm  | J | 0  | 0  | 0  | 0  | 0  | 0   | 0  | 0  | 0  | 0   | 0   |
| Mel_spec  | J | 0  | 0  | 0  | 0  | 0  | 0   | 0  | 0  | 0  | 0   | 2   |
| Nav_aren  | J | 0  | 0  | 0  | 0  | 0  | 0   | 0  | 0  | 0  | 0   | 0   |
| Nav_brem  | J | 0  | 0  | 0  | 0  | 0  | 0   | 0  | 0  | 0  | 0   | 0   |
| Nav_cinc  | J | 0  | 0  | 0  | 0  | 0  | 0   | 0  | 0  | 0  | 0   | 0   |
| Nav_clem  | J | 0  | 0  | 0  | 0  | 0  | 0   | 0  | 0  | 0  | 0   | 0   |
| Nav_cryp  | J | 0  | 0  | 2  | 8  | 0  | 0   | 2  | 0  | 0  | 0   | 0   |
| Nav_digi  | J | 0  | 0  | 0  | 0  | 0  | 0   | 0  | 0  | 0  | 0   | 0   |
| Nav_duer  | J | 0  | 0  | 0  | 0  | 3  | 0   | 0  | 0  | 0  | 2   | 0   |
| Nav_flan  | J | 0  | 0  | 0  | 0  | 0  | 0   | 0  | 0  | 0  | 0   | 0   |
| Nav_greg  | J | 2  | 6  | 41 | 12 | 2  | 2   | 8  | 7  | 4  | 8   | 45  |
| Nav_infi  | J | 0  | 0  | 0  | 0  | 0  | 0   | 0  | 0  | 0  | 0   | 0   |
| Nav_lanc  | J | 0  | 0  | 4  | 0  | 0  | 0   | 0  | 0  | 0  | 0   | 0   |
| Nav_meni  | J | 0  | 0  | 0  | 0  | 0  | 0   | 0  | 0  | 0  | 0   | 1   |
| Nav_nole  | J | 0  | 0  | 0  | 0  | 1  | 0   | 0  | 0  | 0  | 0   | 0   |
| Nav_pere  | J | 0  | 0  | 0  | 1  | 0  | 0   | 0  | 0  | 0  | 0   | 0   |
| Nav_perm  | J | 14 | 22 | 49 | 43 | 52 | 18  | 33 | 62 | 84 | 185 | 25  |
| Nav_phyl  | J | 4  | 5  | 21 | 8  | 4  | 4   | 22 | 13 | 2  | 5   | 11  |
| Nav_rato  | J | 0  | 0  | 0  | 0  | 0  | 0   | 0  | 0  | 0  | 0   | 0   |
| Nav_rhyn  | J | 0  | 0  | 0  | 0  | 4  | 0   | 3  | 0  | 0  | 0   | 4   |
| Nav_saco  | J | 0  | 0  | 0  | 0  | 0  | 2   | 0  | 0  | 2  | 2   | 0   |
| Nav_sana  | J | 0  | 0  | 0  | 0  | 0  | 0   | 0  | 0  | 4  | 0   | 0   |
| Nav_sjoe  | J | 0  | 0  | 0  | 0  | 2  | 0   | 0  | 0  | 0  | 0   | 0   |
| Nav_supr  | J | 0  | 0  | 0  | 0  | 0  | 0   | 0  | 0  | 0  | 0   | 0   |
| Nav_trip  | J | 0  | 1  | 0  | 0  | 1  | 0   | 0  | 0  | 0  | 2   | 0   |
| Nav_vene  | J | 0  | 0  | 2  | 0  | 0  | 1   | 0  | 2  | 0  | 2   | 0   |
| Ncy_pusi  | J | 10 | 0  | 1  | 2  | 2  | 12  | 5  | 0  | 2  | 4   | 0   |
| Nit_amph  | J | 0  | 1  | 0  | 0  | 0  | 0   | 0  | 0  | 0  | 0   | 0   |
| Nit_anla  | J | 0  | 0  | 0  | 0  | 0  | 0   | 0  | 0  | 0  | 0   | 0   |
| Nit_aura  | J | 0  | 0  | 0  | 0  | 0  | 0   | 0  | 0  | 0  | 0   | 0   |
| Nit_brev  | J | 0  | 0  | 0  | 0  | 6  | 0   | 0  | 0  | 0  | 0   | 0   |
| Nit_comm  | J | 0  | 0  | 2  | 0  | 0  | 0   | 0  | 0  | 0  | 0   | 0   |
| Nit_diss  | J | 0  | 0  | 0  | 0  | 0  | 0   | 0  | 0  | 0  | 0   | 0   |
| Nit_dubi  | J | 0  | 0  | 0  | 0  | 0  | 0   | 0  | 0  | 0  | 0   | 0   |
| Nit_eleg  | J | 0  | 0  | 0  | 0  | 0  | 3   | 4  | 6  | 0  | 0   | 0   |
| Nit_fili  | J | 0  | 1  | 0  | 0  | 0  | 0   | 0  | 0  | 2  | 0   | 0   |
| Nit_flex  | J | 0  | 0  | 0  | 0  | 0  | 0   | 0  | 0  | 0  | 0   | 0   |
| Nit_frus  | J | 51 | 92 | 74 | 49 | 57 | 62  | 58 | 69 | 76 | 101 | 107 |
| Nit_gand  | J | 1  | 0  | 0  | 0  | 0  | 0   | 0  | 0  | 0  | 0   | 0   |
| Nit_heuf  | J | 0  | 0  | 0  | 0  | 0  | 0   | 0  | 0  | 0  | 0   | 0   |
| Nit_inco  | J | 0  | 1  | 0  | 0  | 2  | 2   | 0  | 0  | 2  | 0   | 0   |
| Nit_lieb  | J | 4  | 0  | 1  | 6  | 7  | 6   | 4  | 8  | 7  | 4   | 2   |
| Nit_lisu  | J | 0  | 2  | 0  | 1  | 0  | 0   | 0  | 0  | 0  | 0   | 0   |
| Nit_lore  | J | 0  | 0  | 0  | 0  | 0  | 0   | 0  | 0  | 0  | 0   | 0   |
| Nit_micr  | J | 40 | 64 | 50 | 61 | 83 | 64  | 38 | 55 | 35 | 9   | 14  |
| Nit_pale  | J | 0  | 2  | 0  | 3  | 2  | 0   | 0  | 0  | 2  | 0   | 0   |
| Nit_pate  | J | 0  | 1  | 0  | 5  | 0  | 0   | 0  | 0  | 0  | 0   | 0   |
| Nit_pcea  | J | 13 | 5  | 0  | 58 | 41 | 4   | 4  | 0  | 6  | 0   | 0   |
| Nit_pell  | J | 0  | 0  | 0  | 0  | 0  | 0   | 1  | 0  | 0  | 0   | 0   |
| Nit_perm  | J | 0  | 0  | 0  | 0  | 0  | 0   | 0  | 0  | 0  | 0   | 0   |
| Nit_pusi  | J | 1  | 0  | 14 | 16 | 18 | 9   | 2  | 6  | 0  | 0   | 0   |
| Nit_reve  | J | 0  | 0  | 0  | 0  | 0  | 0   | 0  | 0  | 0  | 0   | 0   |
| Nit_rose  | J | 39 | 16 | 11 | 36 | 10 | 7   | 9  | 20 | 8  | 4   | 3   |







|          |   |     |     |     |     |     |     |     |     |     |     |     |
|----------|---|-----|-----|-----|-----|-----|-----|-----|-----|-----|-----|-----|
| Hal_subh | K | 0   | 0   | 1   | 1   | 0   | 2   | 0   | 0   | 0   | 1   | 1   |
| Hal_tene | K | 1   | 1   | 12  | 3   | 6   | 4   | 1   | 2   | 6   | 0   | 0   |
| Hal_vene | K | 0   | 0   | 0   | 0   | 0   | 0   | 0   | 0   | 0   | 0   | 0   |
| Has_spic | K | 0   | 0   | 8   | 4   | 2   | 22  | 1   | 2   | 0   | 0   | 0   |
| Hip_hung | K | 0   | 0   | 0   | 2   | 0   | 0   | 0   | 0   | 0   | 0   | 0   |
| Hip_lesm | K | 0   | 2   | 0   | 0   | 0   | 1   | 0   | 0   | 2   | 0   | 0   |
| Hya_scot | K | 0   | 0   | 0   | 0   | 0   | 0   | 0   | 0   | 0   | 0   | 0   |
| Kar_amo  | K | 0   | 0   | 0   | 0   | 0   | 0   | 0   | 0   | 0   | 0   | 0   |
| Kar_clev | K | 0   | 2   | 0   | 0   | 0   | 0   | 0   | 0   | 0   | 0   | 2   |
| Lic_comm | K | 0   | 0   | 0   | 0   | 0   | 0   | 0   | 0   | 2   | 0   | 0   |
| Lic_debi | K | 0   | 0   | 7   | 1   | 45  | 12  | 0   | 0   | 0   | 2   | 0   |
| Lic_gran | K | 0   | 0   | 0   | 0   | 0   | 0   | 0   | 0   | 0   | 0   | 0   |
| Lic_rhom | K | 0   | 0   | 0   | 0   | 0   | 0   | 0   | 0   | 0   | 0   | 0   |
| Lun_bise | K | 4   | 0   | 0   | 0   | 1   | 0   | 0   | 0   | 0   | 2   | 1   |
| Lut_muti | K | 0   | 0   | 0   | 0   | 0   | 0   | 0   | 0   | 0   | 0   | 0   |
| Mar_atom | K | 15  | 2   | 6   | 8   | 14  | 5   | 4   | 6   | 1   | 13  | 0   |
| Mar_schu | K | 0   | 0   | 0   | 0   | 0   | 0   | 0   | 0   | 0   | 0   | 0   |
| Mas_balt | K | 0   | 0   | 0   | 0   | 0   | 0   | 0   | 0   | 0   | 0   | 0   |
| Mas_brau | K | 0   | 0   | 0   | 0   | 0   | 0   | 0   | 0   | 0   | 0   | 0   |
| Mas_elli | K | 0   | 0   | 0   | 2   | 2   | 5   | 2   | 0   | 0   | 0   | 0   |
| Mas_exig | K | 0   | 0   | 0   | 0   | 0   | 0   | 0   | 0   | 0   | 0   | 0   |
| Mas_pumi | K | 0   | 0   | 0   | 4   | 7   | 28  | 5   | 18  | 0   | 3   | 4   |
| Mas_smit | K | 0   | 0   | 8   | 3   | 80  | 82  | 29  | 27  | 0   | 2   | 3   |
| May_atom | K | 0   | 0   | 0   | 0   | 0   | 0   | 0   | 0   | 0   | 0   | 0   |
| Mel_arct | K | 0   | 0   | 0   | 0   | 0   | 0   | 0   | 0   | 0   | 0   | 0   |
| Mel_line | K | 7   | 11  | 0   | 0   | 1   | 0   | 0   | 0   | 2   | 16  | 4   |
| Mel_moni | K | 4   | 8   | 2   | 0   | 0   | 0   | 0   | 2   | 4   | 20  | 82  |
| Mel_numm | K | 10  | 4   | 1   | 0   | 1   | 0   | 0   | 0   | 0   | 0   | 0   |
| Mel_spec | K | 100 | 35  | 22  | 199 | 156 | 85  | 266 | 127 | 160 | 256 | 27  |
| Nav_aren | K | 0   | 0   | 0   | 0   | 0   | 0   | 0   | 0   | 0   | 0   | 0   |
| Nav_brem | K | 0   | 0   | 0   | 0   | 0   | 0   | 0   | 0   | 0   | 0   | 0   |
| Nav_cinc | K | 0   | 0   | 0   | 0   | 0   | 0   | 0   | 0   | 0   | 0   | 0   |
| Nav_clem | K | 0   | 0   | 0   | 0   | 0   | 0   | 0   | 0   | 0   | 0   | 0   |
| Nav_cryp | K | 0   | 0   | 0   | 0   | 0   | 0   | 0   | 0   | 0   | 0   | 0   |
| Nav_digi | K | 0   | 0   | 0   | 0   | 0   | 0   | 0   | 0   | 0   | 0   | 0   |
| Nav_duer | K | 0   | 6   | 19  | 31  | 4   | 1   | 3   | 6   | 0   | 3   | 0   |
| Nav_flan | K | 0   | 0   | 0   | 0   | 0   | 0   | 0   | 0   | 0   | 0   | 0   |
| Nav_greg | K | 8   | 16  | 2   | 0   | 0   | 0   | 2   | 0   | 2   | 2   | 0   |
| Nav_infi | K | 4   | 2   | 0   | 0   | 0   | 0   | 0   | 2   | 2   | 2   | 0   |
| Nav_lanc | K | 0   | 0   | 0   | 2   | 0   | 0   | 0   | 0   | 0   | 0   | 0   |
| Nav_meni | K | 0   | 0   | 0   | 0   | 0   | 0   | 0   | 0   | 0   | 0   | 0   |
| Nav_nole | K | 0   | 0   | 0   | 0   | 0   | 0   | 0   | 0   | 0   | 0   | 0   |
| Nav_pere | K | 0   | 0   | 0   | 0   | 0   | 2   | 0   | 0   | 0   | 0   | 0   |
| Nav_perm | K | 80  | 147 | 78  | 30  | 58  | 122 | 208 | 344 | 382 | 48  | 237 |
| Nav_phyl | K | 1   | 1   | 0   | 0   | 0   | 0   | 0   | 1   | 2   | 0   | 0   |
| Nav_rato | K | 0   | 6   | 0   | 1   | 0   | 0   | 0   | 0   | 0   | 1   | 0   |
| Nav_rhyn | K | 0   | 0   | 0   | 0   | 0   | 0   | 0   | 0   | 0   | 0   | 0   |
| Nav_saco | K | 2   | 0   | 0   | 1   | 0   | 0   | 0   | 0   | 0   | 0   | 0   |
| Nav_sana | K | 0   | 0   | 0   | 0   | 0   | 0   | 0   | 0   | 0   | 0   | 0   |
| Nav_sjoe | K | 0   | 0   | 0   | 0   | 0   | 0   | 0   | 0   | 0   | 0   | 0   |
| Nav_supr | K | 0   | 0   | 0   | 0   | 0   | 0   | 0   | 0   | 0   | 0   | 0   |
| Nav_trip | K | 0   | 0   | 0   | 0   | 0   | 0   | 0   | 0   | 0   | 0   | 0   |
| Nav_vene | K | 0   | 0   | 0   | 0   | 0   | 0   | 0   | 0   | 0   | 0   | 0   |
| Ncy_pusi | K | 0   | 0   | 0   | 2   | 0   | 2   | 7   | 4   | 0   | 0   | 0   |
| Nit_amph | K | 0   | 0   | 0   | 0   | 0   | 0   | 1   | 0   | 0   | 0   | 0   |
| Nit_anla | K | 0   | 0   | 0   | 0   | 0   | 0   | 0   | 0   | 0   | 0   | 0   |
| Nit_aura | K | 0   | 0   | 0   | 0   | 0   | 0   | 0   | 0   | 0   | 0   | 0   |
| Nit_brev | K | 0   | 0   | 0   | 0   | 0   | 0   | 0   | 0   | 0   | 0   | 0   |
| Nit_comm | K | 0   | 0   | 0   | 0   | 0   | 0   | 0   | 0   | 0   | 0   | 0   |
| Nit_diss | K | 0   | 0   | 0   | 0   | 0   | 0   | 0   | 0   | 0   | 0   | 0   |
| Nit_dubi | K | 0   | 0   | 0   | 0   | 0   | 0   | 0   | 0   | 0   | 0   | 0   |
| Nit_eleg | K | 0   | 0   | 0   | 0   | 0   | 0   | 0   | 0   | 0   | 0   | 0   |
| Nit_fili | K | 2   | 1   | 2   | 0   | 0   | 0   | 0   | 0   | 0   | 0   | 6   |
| Nit_flex | K | 0   | 0   | 0   | 0   | 0   | 0   | 0   | 0   | 0   | 0   | 0   |
| Nit_frus | K | 25  | 56  | 91  | 29  | 33  | 47  | 53  | 73  | 96  | 40  | 129 |
| Nit_gand | K | 2   | 0   | 0   | 0   | 0   | 0   | 0   | 0   | 0   | 0   | 0   |
| Nit_heuf | K | 0   | 0   | 0   | 0   | 0   | 0   | 0   | 0   | 0   | 0   | 0   |
| Nit_inco | K | 0   | 0   | 0   | 0   | 0   | 0   | 0   | 0   | 0   | 0   | 0   |
| Nit_lieb | K | 0   | 17  | 14  | 8   | 0   | 0   | 4   | 7   | 16  | 0   | 5   |
| Nit_lisu | K | 0   | 0   | 0   | 0   | 0   | 0   | 0   | 0   | 0   | 0   | 0   |
| Nit_lore | K | 0   | 0   | 0   | 0   | 0   | 0   | 0   | 0   | 0   | 2   | 0   |
| Nit_micr | K | 8   | 14  | 71  | 42  | 10  | 18  | 32  | 33  | 27  | 13  | 22  |
| Nit_pale | K | 0   | 0   | 0   | 0   | 0   | 2   | 3   | 0   | 0   | 0   | 0   |
| Nit_pate | K | 0   | 0   | 0   | 9   | 4   | 0   | 8   | 0   | 0   | 0   | 0   |
| Nit_pcea | K | 14  | 51  | 147 | 278 | 54  | 51  | 25  | 5   | 2   | 0   | 2   |
