# Supplementary material for: Diatom Cell Size, Coloniality and Motility: Trade-Offs between Temperature, Salinity and Nutrient Supply with Climate Change
Source: PubMed Central journal article supplement (PMC4184900; doi:10.1371/journal.pone.0109993), 2014-10-03
Supplement: pone.0109993.s003.pdf [file pone.0109993.s003.pdf]

Table S3. Dataset "Salinity" with 119 sites: Environmental and biotic variables. Abbreviations cf. Figure 6.

| AREA          | ABBR | SITE | SITE NAME      | LATITUDE      | LONGITUDE     | SALIN | °C<br>TEMP | µmol/L<br>DIN | µmol/L<br>DIP | µmol/L<br>DSI | mol/mol<br>N:P | 1-5 scale<br>EXP | mg/cm <sup>2</sup><br>SAND | 1-6 scale<br>BEACH | of 1000<br>RICHN | mg/cm <sup>2</sup><br>ADW | % of DW<br>ADW% |
|---------------|------|------|----------------|---------------|---------------|-------|------------|---------------|---------------|---------------|----------------|------------------|----------------------------|--------------------|------------------|---------------------------|-----------------|
| Hanöbukten    | Han  | 15   | Listershuvud   | 56° 02' 05" N | 14° 46' 55" E | 7.8   | 3.3        | 0.36          | 0.23          | 1.07          | 1.58           | 5                | 0.098                      | 6                  | 28               | 0.914                     | 34.6            |
| Hanöbukten    | Han  | 16   | Listershuvud   | 56° 02' 08" N | 14° 46' 53" E | 7.1   | 6.0        | 1.29          | 16.13         | 2.14          | 0.08           | 1                | 0.042                      | 3                  | 26               | 1.115                     | 31.9            |
| Hanöbukten    | Han  | 17   | Hörvik         | 56° 02' 32" N | 14° 46' 10" E | 7.3   | 5.3        | 0.21          | 0.19          | 0.71          | 1.11           | 2                | 0.551                      | 3                  | 35               | 2.651                     | 55.9            |
| Hanöbukten    | Han  | 18   | Knutsång       | 56° 02' 35" N | 14° 45' 37" E | 7.1   | 4.0        | 0.43          | 0.65          | 2.86          | 0.66           | 4                | 0.124                      | 1                  | 29               | 1.374                     | 53.6            |
| Hanöbukten    | Han  | 19   | Mjällbynabben  | 56° 03' 12" N | 14° 45' 27" E | 7.3   | 4.0        | 0.36          | 0.42          | 3.21          | 0.85           | 4                | 0.295                      | 3                  | 38               | 6.025                     | 43.0            |
| Hanöbukten    | Han  | 20   | Nogersund      | 56° 00' 26" N | 14° 44' 40" E | 7.6   | 5.3        | 0.43          | 0.55          | 2.50          | 0.78           | 2                | 0.788                      | 2                  | 46               | 1.475                     | 15.2            |
| Hanöbukten    | Han  | 21   | Nogersund hamn | 56° 00' 15" N | 14° 44' 06" E | 6.6   | 6.0        | 0.36          | 0.71          | 4.29          | 0.50           | 1                | 0.376                      | 3                  | 42               | 8.610                     | 13.9            |
| Hanöbukten    | Han  | 22   | Getabjär       | 56° 01' 05" N | 14° 45' 52" E | 7.1   | 4.0        | 0.36          | 0.16          | 3.21          | 2.22           | 4                | 0.613                      | 4                  | 27               | 7.511                     | 40.1            |
| Hanöbukten    | Han  | 23   | Nogersund      | 56° 00' 18" N | 14° 44' 23" E | 6.2   | 4.6        | 0.43          | 0.74          | 2.50          | 0.58           | 3                | 1.533                      | 3                  | 31               | 4.339                     | 31.4            |
| Kalmarsund    | Kal  | 25   | Figeholm       | 57° 22' 10" N | 16° 33' 19" E | 6.2   | 2.7        | 0.50          | 0.55          | 6.07          | 0.91           | 3                | 0.009                      | 3                  | 36               | 3.250                     | 49.6            |
| Kalmarsund    | Kal  | 26   | Djupviken      | 57° 21' 26" N | 16° 33' 16" E | 7.3   | 2.0        | 0.50          | 0.52          | 5.00          | 0.97           | 4                | 0.013                      | 3                  | 33               | 6.230                     | 54.1            |
| Kalmarsund    | Kal  | 29   | Långholme      | 57° 20' 59" N | 16° 33' 40" E | 7.1   | 2.0        | 0.93          | 1.55          | 7.86          | 0.60           | 4                | 0.035                      | 5                  | 29               | 5.207                     | 47.5            |
| Kalmarsund    | Kal  | 30   | Lökö           | 57° 20' 48" N | 16° 34' 32" E | 7.0   | 1.3        | 0.50          | 1.84          | 7.14          | 0.27           | 5                | 0.024                      | 5                  | 33               | 3.394                     | 57.3            |
| Kalmarsund    | Kal  | 31   | Kräkelund      | 57° 26' 48" N | 16° 43' 42" E | 7.5   | 1.3        | 0.50          | 0.74          | 2.50          | 0.67           | 5                | 0.007                      | 6                  | 39               | 6.110                     | 61.8            |
| Kalmarsund    | Kal  | 32   | Kräkelund      | 57° 26' 45" N | 16° 43' 32" E | 7.0   | 3.3        | 0.64          | 0.71          | 3.21          | 0.91           | 2                | 0.114                      | 4                  | 34               | 8.192                     | 52.8            |
| Kväddöfjärden | Kvä  | 33   | Skogsholmen    | 58° 00' 25" N | 16° 44' 25" E | 6.8   | 7.9        | 0.29          | 0.03          | 6.49          | 8.92           | 2                | 0.209                      | 5                  | 42               | 2.675                     | 28.4            |
| Kväddöfjärden | Kvä  | 34   | Skogsholmen    | 58° 00' 20" N | 16° 44' 19" E | 6.7   | 6.5        | 0.29          | 0.45          | 4.29          | 0.63           | 4                | 0.063                      | 5                  | 45               | 4.753                     | 44.3            |
| Kväddöfjärden | Kvä  | 35   | Östra Ed       | 58° 01' 46" N | 16° 39' 52" E | 6.6   | 7.2        | 0.64          | 1.32          | 8.21          | 0.49           | 3                | 1.404                      | 2                  | 48               | 3.093                     | 26.7            |
| Kväddöfjärden | Kvä  | 36   | Sandviken      | 58° 00' 47" N | 16° 40' 16" E | 6.5   | 7.2        | 0.43          | 0.35          | 4.64          | 1.21           | 3                | 0.528                      | 2                  | 44               | 3.706                     | 30.0            |
| Kväddöfjärden | Kvä  | 37   | Björnhällen    | 57° 21' 49" N | 16° 41' 21" E | 6.7   | 6.5        | 0.36          | 0.42          | 6.43          | 0.85           | 4                | 0.308                      | 5                  | 49               | 3.979                     | 24.8            |
| Kväddöfjärden | Kvä  | 38   | Berkholmen     | 57° 59' 39" N | 16° 43' 47" E | 6.2   | 6.5        | 0.36          | 0.29          | 5.71          | 1.23           | 4                | 0.030                      | 5                  | 49               | 3.098                     | 46.0            |
| Kväddöfjärden | Kvä  | 39   | Skogsholmen    | 58° 00' 30" N | 16° 44' 15" E | 7.0   | 7.2        | 0.36          | 0.52          | 7.50          | 0.69           | 3                | 0.704                      | 5                  | 53               | 2.812                     | 33.2            |
| Kväddöfjärden | Kvä  | 40   | Högholmen      | 58° 00' 15" N | 16° 46' 42" E | 6.1   | 6.5        | 0.29          | 0.23          | 2.86          | 1.26           | 4                | 0.171                      | 5                  | 41               | 5.223                     | 49.4            |
| Kväddöfjärden | Kvä  | 41   | Fjärdholmen    | 58° 01' 07" N | 16° 46' 04" E | 6.9   | 8.6        | 0.36          | 0.29          | 3.93          | 1.23           | 1                | 0.044                      | 2                  | 34               | 1.837                     | 47.2            |
| Kväddöfjärden | Kvä  | 42   | Stora Röttskär | 58° 01' 12" N | 16° 47' 12" E | 7.1   | 6.5        | 0.29          | 0.65          | 5.36          | 0.44           | 4                | 0.026                      | 5                  | 28               | 3.414                     | 54.3            |
| Kväddöfjärden | Kvä  | 44   | Torrö          | 58° 00' 28" N | 16° 48' 39" E | 7.0   | 7.9        | 0.29          | 0.42          | 3.57          | 0.68           | 2                | 0.009                      | 5                  | 32               | 2.352                     | 55.3            |
| Himmerfjärden | Him  | 45   | Sibble         | 59° 06' 18" N | 17° 45' 17" E | 5.6   | 7.2        | 2.57          | 0.03          | 4.64          | 80.33          | 3                | 1.053                      | 1                  | 55               | 2.982                     | 14.3            |
| Himmerfjärden | Him  | 46   | Sandviken      | 59° 03' 14" N | 17° 41' 27" E | 5.5   | 6.5        | 0.50          | 0.03          | 3.21          | 15.62          | 4                | 0.518                      | 5                  | 44               | 4.291                     | 32.3            |
| Himmerfjärden | Him  | 47   | Sandviken      | 59° 03' 04" N | 17° 41' 44" E | 5.1   | 6.5        | 0.71          | 0.10          | 3.57          | 7.39           | 4                | 0.319                      | 2                  | 41               | 6.815                     | 30.6            |
| Himmerfjärden | Him  | 48   | Salsudd        | 59° 02' 34" N | 17° 41' 46" E | 5.1   | 7.2        | 0.71          | 0.03          | 1.43          | 22.31          | 3                | 2.319                      | 2                  | 44               | 1.904                     | 30.9            |
| Himmerfjärden | Him  | 49   | Mölleviken     | 59° 02' 17" N | 17° 41' 30" E | 5.4   | 6.5        | 0.50          | 0.10          | 6.07          | 5.17           | 4                | 4.049                      | 1                  | 43               | 7.500                     | 23.1            |
| Himmerfjärden | Him  | 50   | Axviken        | 59° 01' 06" N | 17° 41' 48" E | 5.6   | 7.9        | 0.71          | 0.03          | 5.36          | 22.30          | 2                | 0.618                      | 2                  | 60               | 4.151                     | 13.0            |
| Himmerfjärden | Him  | 51   | Oaxen          | 58° 58' 09" N | 17° 42' 24" E | 5.8   | 6.5        | 0.21          | 0.03          | 3.93          | 6.69           | 4                | 0.802                      | 3                  | 37               | 4.559                     | 30.8            |
| Himmerfjärden | Him  | 52   | Tunanäs        | 58° 59' 01" N | 17° 42' 27" E | 5.8   | 6.5        | 0.21          | 0.45          | 7.50          | 0.47           | 4                | 7.503                      | 3                  | 60               | 4.570                     | 9.3             |
| Himmerfjärden | Him  | 53   | Tunaviken      | 58° 59' 05" N | 17° 41' 58" E | 5.8   | 7.9        | 0.21          | 0.29          | 2.50          | 0.74           | 2                | 0.432                      | 2                  | 47               | 5.166                     | 21.2            |
| Himmerfjärden | Him  | 55   | Ekö            | 58° 54' 48" N | 17° 41' 36" E | 6.1   | 5.9        | 0.43          | 0.03          | 2.86          | 13.39          | 5                | 0.033                      | 6                  | 49               | 8.513                     | 39.6            |
| Himmerfjärden | Him  | 56   | Ekö            | 58° 54' 38" N | 17° 41' 36" E | 6.3   | 6.5        | 0.36          | 0.03          | 3.57          | 11.15          | 4                | 0.334                      | 2                  | 37               | 4.490                     | 33.6            |
| Himmerfjärden | Him  | 57   | Ekö            | 58° 54' 44" N | 17° 41' 23" E | 6.2   | 7.9        | 0.79          | 0.32          | 6.43          | 2.44           | 2                | 0.210                      | 2                  | 46               | 2.166                     | 20.4            |
| Gräsö         | Grä  | 59   | Örkärssundet   | 60° 30' 14" N | 18° 23' 37" E | 5.1   | 10.4       | 1.07          | 0.03          | 10.00         | 33.21          | 1                | 0.075                      | 2                  | 73               | 4.725                     | 18.4            |
| Gräsö         | Grä  | 60   | Örkärssundet   | 60° 30' 18" N | 18° 23' 35" E | 5.1   | 8.4        | 0.43          | 0.03          | 6.07          | 13.29          | 4                | 0.045                      | 5                  | 66               | 1.922                     | 29.9            |
| Gräsö         | Grä  | 61   | Örkärssundet   | 60° 30' 29" N | 18° 23' 58" E | 5.1   | 7.7        | 0.64          | 0.03          | 5.71          | 19.93          | 5                | 0.027                      | 6                  | 52               | 2.450                     | 33.7            |
| Gräsö         | Grä  | 62   | Örkärssundet   | 60° 30' 24" N | 18° 23' 57" E | 5.1   | 8.4        | 0.79          | 0.03          | 6.07          | 24.36          | 4                | 0.096                      | 2                  | 57               | 3.117                     | 26.8            |
| Gräsö         | Grä  | 63   | Björnören      | 60° 24' 49" N | 18° 32' 23" E | 5.1   | 7.7        | 0.86          | 0.03          | 7.50          | 26.57          | 5                | 0.021                      | 6                  | 52               | 4.265                     | 36.0            |
| Gräsö         | Grä  | 64   | Björnören      | 60° 24' 53" N | 18° 28' 22" E | 5.1   | 8.4        | 0.86          | 0.03          | 6.79          | 26.57          | 4                | 0.070                      | 3                  | 57               | 2.515                     | 32.6            |
| Gräsö         | Grä  | 65   | Björnören      | 60° 24' 55" N | 18° 28' 15" E | 5.1   | 9.7        | 0.86          | 0.13          | 6.43          | 6.64           | 2                | 2.729                      | 2                  | 56               | 2.664                     | 24.9            |
| Gräsö         | Grä  | 66   | Djursten       | 60° 22' 27" N | 18° 24' 21" E | 5.1   | 9.1        | 0.71          | 0.03          | 6.43          | 22.14          | 3                | 0.224                      | 2                  | 52               | 0.897                     | 16.6            |
| Gräsö         | Grä  | 67   | Djursten       | 60° 22' 18" N | 18° 24' 18" E | 5.0   | 10.4       | 1.43          | 0.03          | 5.71          | 44.29          | 1                | 0.497                      | 2                  | 65               | 4.472                     | 8.6             |
| Gräsö         | Grä  | 68   | Djursten       | 60° 22' 14" N | 18° 24' 11" E | 5.1   | 8.4        | 0.93          | 0.03          | 4.64          | 28.79          | 4                | 0.214                      | 6                  | 53               | 2.849                     | 36.9            |
| Gävlebukten   | Gäv  | 101  | Eskön          | 60° 53' 34" N | 17° 21' 23" E | 5.1   | 1.0        | 0.36          | 0.29          | 7.86          | 1.23           | 5                | 0.005                      | 5                  | 35               | 1.097                     | 47.7            |
| Gävlebukten   | Gäv  | 102  | Eskön          | 60° 55' 57" N | 17° 20' 25" E | 5.1   | 2.3        | 0.21          | 0.13          | 9.64          | 1.66           | 3                | 0.009                      | 5                  | 55               | 1.309                     | 30.2            |
| Gävlebukten   | Gäv  | 103  | Eskön          | 60° 56' 09" N | 17° 20' 37" E | 5.0   | 1.7        | 0.21          | 0.03          | 5.71          | 6.64           | 4                | 0.029                      | 5                  | 33               | 4.245                     | 45.8            |
| Gävlebukten   | Gäv  | 104  | Eskön          | 60° 56' 00" N | 17° 19' 15" E | 5.1   | 2.3        | 0.21          | 0.06          | 7.86          | 3.32           | 3                | 0.086                      | 5                  | 57               | 2.971                     | 24.2            |

|               |     |     |                 |               |               |     |     |      |      |       |       |   |       |   |    |       |      |
|---------------|-----|-----|-----------------|---------------|---------------|-----|-----|------|------|-------|-------|---|-------|---|----|-------|------|
| Gävlebukten   | Gäv | 105 | Eskön           | 60° 51' 55" N | 17° 18' 52" E | 4.9 | 3.0 | 0.86 | 0.52 | 6.43  | 1.66  | 2 | 0.240 | 5 | 61 | 5.251 | 27.9 |
| Gävlebukten   | Gäv | 106 | Eskön           | 60° 52' 02" N | 17° 18' 55" E | 4.6 | 3.7 | 1.00 | 0.26 | 7.50  | 3.88  | 1 | 0.266 | 2 | 59 | 1.865 | 28.9 |
| Gävlebukten   | Gäv | 119 | Gåsholma        | 61° 00' 16" N | 17° 14' 42" E | 4.8 | 3.7 | 2.00 | 0.29 | 15.36 | 6.89  | 1 | 0.247 | 2 | 78 | 2.886 | 24.0 |
| Gävlebukten   | Gäv | 121 | Kusön           | 61° 02' 53" N | 17° 14' 10" E | 4.4 | 1.0 | 0.79 | 0.03 | 20.36 | 24.36 | 5 | 0.007 | 5 | 29 | 1.431 | 53.7 |
| Gävlebukten   | Gäv | 122 | Kusön           | 61° 02' 38" N | 17° 15' 17" E | 4.4 | 1.7 | 0.43 | 0.03 | 17.50 | 13.29 | 4 | 0.049 | 5 | 19 | 1.091 | 33.1 |
| Gävlebukten   | Gäv | 123 | Kusön           | 61° 01' 51" N | 17° 14' 57" E | 4.5 | 3.0 | 0.43 | 0.03 | 13.57 | 13.29 | 2 | 0.020 | 1 | 59 | 1.599 | 29.4 |
| Horslandet    | Hor | 125 | Arnövikén       | 61° 42' 27" N | 17° 23' 03" E | 5.1 | 5.0 | 0.50 | 0.42 | 15.71 | 1.19  | 3 | 0.168 | 5 | 47 | 1.745 | 31.1 |
| Horslandet    | Hor | 126 | Rikstensberget  | 61° 43' 32" N | 17° 24' 53" E | 4.6 | 4.4 | 0.36 | 0.23 | 12.86 | 1.58  | 4 | 2.753 | 5 | 58 | 5.663 | 11.8 |
| Horslandet    | Hor | 127 | Fisklösviken    | 61° 43' 58" N | 17° 27' 09" E | 5.0 | 5.0 | 0.36 | 0.06 | 16.43 | 5.54  | 3 | 0.037 | 5 | 44 | 4.276 | 39.6 |
| Horslandet    | Hor | 128 | Björnviken      | 61° 43' 35" N | 17° 28' 04" E | 4.8 | 5.7 | 0.21 | 0.06 | 16.79 | 3.32  | 2 | 0.009 | 5 | 51 | 2.579 | 51.4 |
| Horslandet    | Hor | 129 | Björnviken      | 61° 43' 46" N | 17° 28' 08" E | 4.8 | 4.4 | 0.36 | 0.03 | 16.79 | 11.07 | 4 | 0.034 | 5 | 53 | 2.151 | 46.1 |
| Horslandet    | Hor | 130 | Notholmsharet   | 61° 43' 16" N | 17° 32' 35" E | 5.0 | 3.7 | 0.36 | 0.10 | 17.50 | 3.69  | 5 | 0.057 | 5 | 31 | 5.020 | 44.2 |
| Horslandet    | Hor | 131 | Notholmsharet   | 61° 43' 16" N | 17° 32' 45" E | 5.0 | 3.7 | 0.36 | 0.16 | 17.50 | 2.21  | 5 | 0.440 | 5 | 45 | 7.184 | 28.4 |
| Horslandet    | Hor | 132 | Tångviken       | 61° 43' 18" N | 17° 32' 44" E | 5.0 | 5.7 | 0.36 | 0.16 | 10.71 | 2.21  | 2 | 7.071 | 2 | 46 | 5.711 | 18.7 |
| Horslandet    | Hor | 133 | Skräddarharet   | 61° 43' 35" N | 17° 31' 12" E | 5.0 | 4.4 | 0.79 | 0.06 | 13.57 | 12.18 | 4 | 0.029 | 5 | 43 | 3.211 | 42.8 |
| Horslandet    | Hor | 134 | Bälsö           | 61° 43' 46" N | 17° 31' 30" E | 5.0 | 6.4 | 0.36 | 0.16 | 15.36 | 2.21  | 1 | 0.280 | 2 | 68 | 1.979 | 11.0 |
| Omnefjärden   | Omn | 136 | Rävsö           | 62° 55' 32" N | 18° 30' 29" E | 5.0 | 1.4 | 0.36 | 0.35 | 16.79 | 1.01  | 5 | 0.398 | 5 | 25 | 2.989 | 39.3 |
| Omnefjärden   | Omn | 137 | Rammberget      | 62° 57' 22" N | 18° 30' 27" E | 5.0 | 2.1 | 0.86 | 0.19 | 17.86 | 4.43  | 4 | 0.001 | 6 | 19 | 0.377 | 30.7 |
| Omnefjärden   | Omn | 138 | Trollarviken    | 62° 57' 44" N | 18° 30' 21" E | 4.7 | 2.7 | 0.50 | 0.13 | 20.36 | 3.88  | 3 | 0.485 | 2 | 61 | 3.173 | 7.0  |
| Omnefjärden   | Omn | 139 | Rävelviken      | 62° 56' 32" N | 18° 28' 29" E | 5.0 | 2.7 | 4.14 | 0.42 | 20.71 | 9.88  | 3 | 1.588 | 5 | 73 | 2.365 | 10.0 |
| Omnefjärden   | Omn | 140 | Bossviksberget  | 62° 58' 00" N | 18° 26' 34" E | 5.0 | 2.7 | 2.14 | 0.19 | 24.64 | 11.07 | 3 | 0.418 | 5 | 64 | 4.740 | 26.3 |
| Omnefjärden   | Omn | 141 | Storöran        | 62° 57' 21" N | 18° 25' 57" E | 5.0 | 2.1 | 0.36 | 0.29 | 15.00 | 1.23  | 4 | 0.440 | 5 | 59 | 2.103 | 22.6 |
| Omnefjärden   | Omn | 142 | Storöran        | 62° 57' 22" N | 18° 26' 34" E | 5.0 | 1.4 | 0.36 | 0.03 | 15.00 | 11.07 | 5 | 0.394 | 5 | 51 | 5.118 | 31.1 |
| Omnefjärden   | Omn | 143 | Måviken-hamn    | 62° 58' 02" N | 18° 25' 22" E | 5.0 | 2.7 | 0.43 | 0.32 | 16.07 | 1.33  | 3 | 0.722 | 5 | 66 | 2.587 | 20.5 |
| Omnefjärden   | Omn | 144 | Mjällomsviken   | 62° 58' 40" N | 18° 25' 09" E | 5.1 | 2.7 | 1.43 | 0.39 | 17.14 | 3.69  | 3 | 0.350 | 2 | 51 | 1.451 | 17.7 |
| Omnefjärden   | Omn | 145 | Mjällomsviken   | 62° 58' 14" N | 18° 24' 45" E | 4.7 | 3.4 | 1.29 | 0.16 | 20.36 | 7.97  | 2 | 0.152 | 2 | 67 | 0.604 | 31.6 |
| Omnefjärden   | Omn | 146 | Björnånäset     | 62° 57' 53" N | 18° 24' 33" E | 4.3 | 3.4 | 0.50 | 0.32 | 28.93 | 1.55  | 2 | 0.181 | 2 | 49 | 2.439 | 28.1 |
| Holmön        | Hol | 147 | Stor Fjäderägg  | 63° 48' 44" N | 21° 00' 35" E | 3.1 | 1.4 | 3.00 | 0.16 | 18.57 | 8.40  | 5 | 0.055 | 5 | 38 | 1.861 | 35.4 |
| Holmön        | Hol | 148 | Stor Fjäderägg  | 63° 48' 05" N | 21° 00' 05" E | 3.0 | 2.1 | 2.36 | 0.03 | 18.21 | 33.00 | 4 | 0.766 | 5 | 49 | 2.790 | 15.0 |
| Holmön        | Hol | 149 | Långögern       | 63° 47' 31" N | 20° 57' 53" E | 3.2 | 3.4 | 3.79 | 0.19 | 22.86 | 8.83  | 2 | 0.050 | 5 | 57 | 2.856 | 33.2 |
| Holmön        | Hol | 150 | Långögern       | 63° 47' 32" N | 20° 58' 01" E | 3.2 | 2.1 | 1.71 | 0.16 | 19.29 | 4.80  | 4 | 0.029 | 5 | 39 | 2.284 | 28.8 |
| Holmön        | Hol | 151 | Gåsflöten       | 63° 47' 18" N | 20° 56' 49" E | 3.2 | 2.7 | 4.64 | 0.03 | 26.07 | 65.00 | 3 | 0.029 | 2 | 59 | 2.664 | 23.8 |
| Holmön        | Hol | 152 | Svårtögern      | 63° 48' 05" N | 20° 55' 52" E | 3.1 | 2.1 | 3.64 | 0.13 | 22.86 | 12.75 | 4 | 0.068 | 5 | 57 | 1.811 | 27.1 |
| Holmön        | Hol | 153 | Lill Fjäderägg  | 63° 48' 49" N | 20° 55' 59" E | 3.3 | 4.1 | 1.36 | 0.10 | 16.07 | 6.33  | 1 | 0.511 | 2 | 75 | 2.688 | 21.0 |
| Holmön        | Hol | 154 | Gädobäckssundet | 63° 45' 50" N | 20° 53' 20" E | 2.9 | 3.4 | 2.36 | 0.16 | 23.57 | 6.60  | 2 | 0.026 | 5 | 68 | 1.329 | 30.4 |
| Holmön        | Hol | 155 | Sörsundet       | 63° 44' 52" N | 20° 52' 44" E | 3.2 | 1.4 | 0.29 | 0.13 | 13.21 | 1.00  | 5 | 0.643 | 5 | 65 | 3.877 | 20.0 |
| Holmön        | Hol | 156 | Sörviken        | 63° 45' 43" N | 20° 51' 16" E | 3.3 | 3.4 | 2.21 | 2.19 | 16.07 | 0.46  | 2 | 0.015 | 5 | 63 | 3.309 | 28.2 |
| Holmön        | Hol | 157 | Gåsflötanögern  | 63° 45' 30" N | 20° 49' 12" E | 3.1 | 1.4 | 3.00 | 0.45 | 18.21 | 3.00  | 5 | 0.021 | 5 | 24 | 1.478 | 37.8 |
| Holmön        | Hol | 158 | Gåsflötanögern  | 63° 45' 34" N | 20° 49' 19" E | 3.3 | 1.4 | 1.93 | 0.03 | 15.36 | 27.00 | 5 | 0.056 | 5 | 26 | 1.843 | 42.2 |
| Holmön        | Hol | 159 | Vedaögern       | 63° 46' 34" N | 20° 49' 34" E | 3.0 | 3.4 | 2.00 | 0.03 | 13.93 | 28.00 | 2 | 0.432 | 6 | 48 | 1.193 | 21.7 |
| Holmön        | Hol | 160 | Lillhällan      | 63° 48' 40" N | 20° 51' 44" E | 3.0 | 1.4 | 5.43 | 0.10 | 25.00 | 25.33 | 5 | 0.011 | 6 | 30 | 0.737 | 31.6 |
| Skelleftehamn | Ske | 162 | Nygrundet       | 64° 40' 26" N | 21° 20' 49" E | 2.4 | 1.0 | 4.14 | 0.03 | 26.79 | 58.00 | 5 | 0.010 | 5 | 35 | 0.995 | 17.4 |
| Skelleftehamn | Ske | 163 | Nygrundet       | 64° 40' 29" N | 21° 20' 36" E | 2.5 | 1.7 | 4.57 | 0.06 | 29.29 | 32.00 | 4 | 0.027 | 5 | 45 | 0.757 | 17.3 |
| Skelleftehamn | Ske | 164 | Storgrundet     | 64° 42' 04" N | 21° 16' 49" E | 2.4 | 1.7 | 3.79 | 0.03 | 25.71 | 53.00 | 4 | 0.025 | 5 | 51 | 1.682 | 18.8 |
| Skelleftehamn | Ske | 166 | Skataudden      | 64° 44' 22" N | 21° 13' 00" E | 2.8 | 1.7 | 5.14 | 0.26 | 25.71 | 9.00  | 4 | 0.676 | 5 | 40 | 2.450 | 13.7 |
| Skelleftehamn | Ske | 167 | Kågnäsudden     | 64° 44' 43" N | 21° 17' 29" E | 2.8 | 1.7 | 4.00 | 0.10 | 25.36 | 18.67 | 4 | 0.050 | 5 | 49 | 1.540 | 14.3 |
| Skelleftehamn | Ske | 168 | Djupskär        | 64° 42' 57" N | 21° 16' 00" E | 2.6 | 1.7 | 4.64 | 0.10 | 27.50 | 21.67 | 4 | 0.018 | 5 | 49 | 0.497 | 11.5 |
| Skelleftehamn | Ske | 169 | Djupviken       | 64° 42' 19" N | 21° 15' 11" E | 2.4 | 3.7 | 4.00 | 0.03 | 31.07 | 56.00 | 1 | 0.039 | 5 | 69 | 1.826 | 17.9 |
| Skelleftehamn | Ske | 171 | Bredskär        | 64° 41' 10" N | 21° 18' 43" E | 2.6 | 3.0 | 2.57 | 0.03 | 22.86 | 36.00 | 2 | 0.249 | 5 | 63 | 4.797 | 14.3 |
| Skelleftehamn | Ske | 172 | Bredskär        | 64° 41' 03" N | 21° 18' 34" E | 2.7 | 1.7 | 1.93 | 0.03 | 22.50 | 37.00 | 4 | 0.475 | 5 | 53 | 4.627 | 19.1 |
| Skelleftehamn | Ske | 173 | Gåsören         | 64° 39' 56" N | 21° 18' 56" E | 2.7 | 1.7 | 5.79 | 0.06 | 30.71 | 40.50 | 4 | 0.005 | 5 | 33 | 0.674 | 27.0 |
| Skelleftehamn | Ske | 174 | Nörd Olsgrundet | 64° 39' 22" N | 21° 16' 05" E | 2.1 | 1.7 | 2.43 | 0.19 | 21.43 | 5.67  | 4 | 0.011 | 5 | 18 | 0.665 | 26.9 |
| Skelleftehamn | Ske | 175 | Vi. Kalkgrundet | 64° 36' 36" N | 21° 18' 59" E | 1.6 | 2.3 | 3.57 | 0.13 | 37.50 | 12.50 | 3 | 0.004 | 5 | 22 | 0.679 | 37.0 |
| Skelleftehamn | Ske | 176 | Långskuttun     | 64° 37' 49" N | 21° 17' 01" E | 2.4 | 1.0 | 5.36 | 0.03 | 33.21 | 75.00 | 5 | 0.006 | 5 | 28 | 0.678 | 32.6 |
| Skelleftehamn | Ske | 177 | Sör Olsgrundet  | 64° 38' 34" N | 21° 16' 27" E | 2.1 | 1.7 | 4.79 | 0.10 | 29.64 | 22.33 | 4 | 0.045 | 5 | 41 | 1.049 | 15.6 |
| Rånefjärden   | Rån | 178 | Lill Långöran   | 65° 46' 10" N | 22° 28' 06" E | 1.2 | 1.0 | 3.43 | 0.26 | 48.93 | 6.00  | 5 | 0.057 | 5 | 64 | 1.690 | 13.1 |
| Rånefjärden   | Rån | 179 | Skorven         | 65° 46' 43" N | 22° 27' 37" E | 0.9 | 1.7 | 4.21 | 0.16 | 52.14 | 11.80 | 4 | 0.099 | 5 | 73 | 1.577 | 10.3 |
| Rånefjärden   | Rån | 180 | Långholmen      | 65° 47' 34" N | 22° 29' 04" E | 0.8 | 1.7 | 1.43 | 0.03 | 43.21 | 20.00 | 4 | 0.034 | 5 | 79 | 1.143 | 13.1 |
| Rånefjärden   | Rån | 181 | Köpmanholmen    | 65° 48' 41" N | 22° 29' 07" E | 0.5 | 2.3 | 2.64 | 0.52 | 40.00 | 2.31  | 3 | 0.120 | 5 | 99 | 1.933 | 9.3  |

|             |     |     |               |               |               |     |     |      |      |       |        |   |       |   |    |       |      |
|-------------|-----|-----|---------------|---------------|---------------|-----|-----|------|------|-------|--------|---|-------|---|----|-------|------|
| Rånefjärden | Rån | 182 | Hällholmen    | 65° 49' 14" N | 22° 27' 37" E | 0.5 | 2.3 | 3.57 | 0.06 | 50.89 | 35.00  | 4 | 0.147 | 4 | 71 | 1.887 | 9.6  |
| Rånefjärden | Rån | 185 | Lill Furuön   | 65° 39' 14" N | 22° 42' 03" E | 2.3 | 1.0 | 7.29 | 0.03 | 44.64 | 102.00 | 5 | 0.001 | 6 | 78 | 0.373 | 47.2 |
| Rånefjärden | Rån | 186 | Fjuksön       | 65° 39' 30" N | 22° 38' 16" E | 2.2 | 1.0 | 4.21 | 0.32 | 38.21 | 5.90   | 5 | 0.049 | 4 | 51 | 1.803 | 11.8 |
| Rånefjärden | Rån | 187 | Rövarklubben  | 65° 40' 42" N | 22° 39' 43" E | 2.5 | 1.7 | 6.00 | 0.39 | 42.50 | 7.00   | 4 | 0.093 | 5 | 55 | 2.263 | 13.2 |
| Rånefjärden | Rån | 189 | Fjuksögrundet | 65° 42' 54" N | 22° 35' 33" E | 1.8 | 1.7 | 5.36 | 0.13 | 45.00 | 18.75  | 4 | 0.018 | 5 | 51 | 1.696 | 16.5 |
| Rånefjärden | Rån | 190 | Lövören       | 65° 43' 22" N | 22° 35' 49" E | 1.8 | 2.3 | 5.93 | 0.16 | 51.07 | 16.60  | 3 | 0.046 | 5 | 78 | 2.003 | 12.3 |
| Rånefjärden | Rån | 191 | Siksundsön    | 65° 45' 02" N | 22° 40' 14" E | 2.3 | 2.3 | 6.43 | 0.10 | 46.43 | 30.00  | 3 | 0.056 | 5 | 64 | 4.088 | 21.6 |
| Rånefjärden | Rån | 192 | Kungsörarna   | 65° 45' 11" N | 22° 41' 46" E | 2.7 | 1.7 | 7.36 | 0.29 | 48.21 | 11.44  | 4 | 0.243 | 5 | 73 | 3.237 | 18.3 |
