# Supplementary material for: Diatom Cell Size, Coloniality and Motility: Trade-Offs between Temperature, Salinity and Nutrient Supply with Climate Change
Source: PubMed Central journal article supplement (PMC4184900; doi:10.1371/journal.pone.0109993), 2014-10-03
Supplement: pone.0109993.s004.pdf [file pone.0109993.s004.pdf]

Table S4. Dataset "Salinity" with 119 sites and 355 diatom taxa: 1000 valves/sample

| AREA<br>SITE | Han<br>15 | Han<br>16 | Han<br>17 | Han<br>18 | Han<br>19 | Han<br>20 | Han<br>21 | Han<br>22 | Han<br>23 |
|--------------|-----------|-----------|-----------|-----------|-----------|-----------|-----------|-----------|-----------|
| Acd_exil     | 0         | 0         | 0         | 0         | 0         | 0         | 0         | 0         | 0         |
| Acd_minu     | 0         | 0         | 0         | 0         | 0         | 0         | 0         | 0         | 0         |
| Acd_pyre     | 0         | 0         | 0         | 0         | 0         | 0         | 0         | 0         | 0         |
| Ach_brev     | 0         | 0         | 0         | 0         | 8         | 0         | 0         | 0         | 0         |
| Ach_brin     | 0         | 0         | 0         | 0         | 4         | 1         | 0         | 0         | 0         |
| Ach_foge     | 0         | 0         | 0         | 0         | 0         | 0         | 0         | 0         | 0         |
| Ach_leon     | 0         | 0         | 0         | 0         | 0         | 0         | 0         | 0         | 0         |
| Ach_long     | 0         | 0         | 0         | 0         | 2         | 0         | 0         | 0         | 0         |
| Ach_luth     | 0         | 0         | 0         | 0         | 0         | 0         | 0         | 0         | 0         |
| Ach_misc     | 3         | 0         | 0         | 0         | 0         | 2         | 0         | 0         | 0         |
| Ach_vist     | 0         | 0         | 0         | 0         | 0         | 0         | 0         | 0         | 0         |
| Act_nosu     | 0         | 0         | 0         | 0         | 0         | 0         | 0         | 0         | 0         |
| Act_occ      | 0         | 0         | 0         | 3         | 0         | 0         | 0         | 0         | 0         |
| Ami_spec     | 0         | 0         | 0         | 0         | 0         | 0         | 0         | 0         | 0         |
| Amp_copu     | 0         | 0         | 0         | 0         | 0         | 0         | 0         | 0         | 0         |
| Amp_fleb     | 0         | 0         | 0         | 0         | 0         | 0         | 0         | 0         | 0         |
| Amp_hele     | 0         | 0         | 0         | 0         | 0         | 2         | 0         | 0         | 0         |
| Amp_inar     | 0         | 0         | 0         | 0         | 0         | 0         | 0         | 0         | 0         |
| Amp_line     | 0         | 0         | 0         | 0         | 0         | 0         | 6         | 0         | 2         |
| Amp_micr     | 0         | 0         | 0         | 0         | 0         | 0         | 0         | 0         | 0         |
| Amp_oval     | 0         | 0         | 0         | 0         | 0         | 0         | 0         | 0         | 0         |
| Amp_pedi     | 0         | 0         | 0         | 0         | 2         | 8         | 2         | 4         | 0         |
| Amp_prof     | 0         | 0         | 0         | 0         | 0         | 0         | 0         | 0         | 0         |
| Ane_mino     | 0         | 0         | 0         | 0         | 0         | 0         | 0         | 0         | 0         |
| Ane_tusc     | 0         | 0         | 0         | 0         | 0         | 0         | 0         | 0         | 0         |
| Ano_spha     | 0         | 0         | 0         | 0         | 0         | 0         | 0         | 0         | 0         |
| Asa_bahu     | 0         | 0         | 0         | 0         | 0         | 0         | 0         | 0         | 0         |
| Ast_form     | 0         | 0         | 0         | 0         | 0         | 0         | 0         | 0         | 0         |
| Aul_spp      | 0         | 0         | 0         | 2         | 0         | 0         | 0         | 0         | 0         |
| Bac_paxi     | 0         | 0         | 0         | 0         | 0         | 0         | 0         | 0         | 0         |
| Ber_fenn     | 0         | 0         | 0         | 0         | 0         | 0         | 0         | 4         | 2         |
| Ber_ruti     | 66        | 33        | 21        | 36        | 35        | 77        | 187       | 73        | 9         |
| Ber_scop     | 0         | 0         | 0         | 0         | 0         | 0         | 14        | 0         | 0         |
| Bir_luce     | 0         | 0         | 0         | 0         | 0         | 0         | 0         | 0         | 0         |
| Bra_apon     | 0         | 0         | 0         | 0         | 0         | 0         | 0         | 0         | 0         |
| Bra_vitr     | 0         | 0         | 0         | 0         | 0         | 0         | 0         | 0         | 0         |
| Bre_lanc     | 0         | 0         | 2         | 0         | 0         | 0         | 0         | 0         | 0         |



|           |   |   |   |    |    |    |   |   |   |
|-----------|---|---|---|----|----|----|---|---|---|
| Den_tecr  | 0 | 0 | 0 | 0  | 0  | 0  | 0 | 0 | 0 |
| Dia_bott  | 0 | 0 | 0 | 0  | 0  | 0  | 0 | 0 | 0 |
| Dia_moni  | 0 | 0 | 0 | 0  | 0  | 1  | 1 | 0 | 0 |
| Dia_prob  | 0 | 0 | 0 | 0  | 0  | 0  | 0 | 0 | 0 |
| Dia_tenu  | 0 | 0 | 0 | 0  | 0  | 0  | 0 | 0 | 0 |
| Dia_vulg  | 0 | 0 | 0 | 0  | 0  | 0  | 0 | 0 | 0 |
| Dic_subi  | 0 | 0 | 0 | 0  | 0  | 10 | 0 | 0 | 0 |
| Dip_depa  | 0 | 0 | 0 | 0  | 0  | 0  | 0 | 0 | 0 |
| Dip_dydi  | 0 | 0 | 0 | 0  | 0  | 0  | 0 | 0 | 0 |
| Dip_elli  | 0 | 0 | 0 | 0  | 0  | 0  | 0 | 0 | 0 |
| Dip_inte  | 0 | 0 | 0 | 0  | 0  | 2  | 0 | 0 | 0 |
| Dip_ocul  | 0 | 0 | 0 | 0  | 0  | 0  | 0 | 0 | 0 |
| Dip_smdi  | 0 | 0 | 0 | 0  | 0  | 0  | 0 | 0 | 0 |
| Dip_smpu  | 0 | 0 | 0 | 0  | 0  | 0  | 0 | 0 | 0 |
| Dip_smrh  | 0 | 0 | 0 | 0  | 0  | 2  | 0 | 0 | 0 |
| Dip_subo  | 0 | 0 | 0 | 0  | 0  | 0  | 0 | 0 | 0 |
| Enc_caes  | 0 | 0 | 0 | 0  | 0  | 0  | 0 | 0 | 0 |
| Enc_lacu  | 0 | 0 | 0 | 0  | 0  | 0  | 0 | 0 | 0 |
| Enc_minu  | 0 | 0 | 0 | 0  | 0  | 0  | 0 | 0 | 0 |
| Enc_obsc  | 0 | 0 | 0 | 0  | 0  | 0  | 0 | 0 | 0 |
| Enc_pros  | 0 | 0 | 0 | 0  | 0  | 0  | 0 | 0 | 0 |
| Enc_sile  | 0 | 0 | 0 | 0  | 0  | 0  | 0 | 0 | 0 |
| Enc_tenu  | 0 | 0 | 0 | 0  | 0  | 0  | 0 | 0 | 0 |
| Enp_behr  | 0 | 0 | 0 | 0  | 0  | 0  | 0 | 0 | 0 |
| Enp_kram  | 0 | 0 | 0 | 0  | 0  | 0  | 0 | 0 | 0 |
| Ent_palu  | 0 | 0 | 0 | 0  | 0  | 0  | 0 | 0 | 0 |
| Ent_pseu  | 0 | 0 | 0 | 0  | 0  | 0  | 0 | 0 | 0 |
| Ent_punc  | 0 | 0 | 0 | 0  | 0  | 0  | 0 | 0 | 0 |
| Epi_adna  | 0 | 0 | 0 | 0  | 0  | 0  | 0 | 0 | 0 |
| Epi_goep  | 0 | 0 | 0 | 0  | 0  | 0  | 0 | 0 | 0 |
| Epi_sore  | 0 | 0 | 0 | 10 | 15 | 0  | 0 | 0 | 0 |
| Epi_turg  | 0 | 0 | 0 | 0  | 0  | 0  | 0 | 0 | 0 |
| Epi_tuwe  | 2 | 0 | 0 | 0  | 0  | 0  | 0 | 0 | 0 |
| Euc_laev  | 0 | 0 | 0 | 0  | 0  | 0  | 0 | 0 | 0 |
| Eun_arcu  | 0 | 0 | 0 | 0  | 0  | 0  | 0 | 0 | 0 |
| Eun_peun  | 0 | 0 | 0 | 0  | 0  | 0  | 0 | 0 | 0 |
| Fal_clep  | 0 | 0 | 0 | 0  | 2  | 0  | 0 | 0 | 0 |
| Fal_cryp  | 0 | 0 | 0 | 0  | 0  | 0  | 0 | 0 | 0 |
| Fal_flor  | 0 | 0 | 0 | 0  | 0  | 0  | 0 | 0 | 0 |
| Fal_psnny | 0 | 0 | 0 | 0  | 0  | 0  | 0 | 0 | 0 |
| Fal_pygm  | 0 | 0 | 0 | 0  | 2  | 0  | 0 | 0 | 0 |







|          |    |    |    |    |    |    |     |    |     |
|----------|----|----|----|----|----|----|-----|----|-----|
| Nit_frig | 0  | 0  | 0  | 0  | 0  | 0  | 0   | 0  | 0   |
| Nit_frus | 0  | 0  | 14 | 19 | 52 | 6  | 0   | 0  | 0   |
| Nit_gros | 0  | 0  | 0  | 0  | 0  | 0  | 0   | 0  | 0   |
| Nit_heuf | 0  | 0  | 0  | 0  | 0  | 0  | 0   | 0  | 0   |
| Nit_inco | 21 | 7  | 32 | 38 | 42 | 38 | 14  | 30 | 162 |
| Nit_inte | 0  | 0  | 0  | 0  | 0  | 0  | 0   | 0  | 0   |
| Nit_lieb | 0  | 0  | 0  | 0  | 0  | 0  | 0   | 0  | 0   |
| Nit_lisu | 0  | 0  | 0  | 0  | 0  | 0  | 0   | 0  | 0   |
| Nit_lore | 0  | 0  | 0  | 0  | 0  | 0  | 0   | 0  | 0   |
| Nit_micr | 0  | 0  | 0  | 0  | 22 | 7  | 78  | 18 | 6   |
| Nit_pale | 0  | 0  | 0  | 0  | 0  | 0  | 0   | 0  | 0   |
| Nit_pcea | 0  | 0  | 0  | 0  | 0  | 0  | 0   | 0  | 0   |
| Nit_pell | 0  | 0  | 0  | 0  | 0  | 0  | 0   | 0  | 0   |
| Nit_perm | 0  | 0  | 0  | 0  | 0  | 0  | 0   | 0  | 0   |
| Nit_pusi | 0  | 0  | 0  | 0  | 0  | 0  | 0   | 0  | 0   |
| Nit_rect | 0  | 0  | 0  | 0  | 0  | 0  | 0   | 0  | 0   |
| Nit_rose | 0  | 0  | 0  | 0  | 0  | 0  | 0   | 0  | 0   |
| Nit_saco | 0  | 0  | 0  | 0  | 0  | 0  | 11  | 0  | 0   |
| Nit_sdea | 0  | 0  | 0  | 0  | 0  | 0  | 0   | 0  | 0   |
| Nit_sigm | 0  | 0  | 0  | 0  | 0  | 0  | 0   | 0  | 0   |
| Nit_soci | 0  | 0  | 0  | 0  | 0  | 0  | 0   | 0  | 0   |
| Nit_soli | 0  | 0  | 0  | 0  | 0  | 0  | 0   | 0  | 0   |
| Nit_subl | 0  | 0  | 0  | 0  | 0  | 0  | 0   | 0  | 0   |
| Nit_ther | 0  | 0  | 0  | 0  | 0  | 0  | 0   | 0  | 0   |
| Nit_umbo | 0  | 0  | 0  | 0  | 0  | 0  | 0   | 0  | 0   |
| Nit_vald | 0  | 0  | 0  | 0  | 0  | 0  | 0   | 0  | 0   |
| Nit_verm | 0  | 0  | 0  | 0  | 0  | 0  | 0   | 0  | 0   |
| Nit_vitr | 0  | 0  | 0  | 0  | 0  | 0  | 0   | 0  | 0   |
| Nit_wuel | 0  | 0  | 0  | 0  | 0  | 0  | 0   | 0  | 0   |
| Ope_krum | 0  | 1  | 10 | 0  | 0  | 24 | 26  | 24 | 35  |
| Ope_muta | 16 | 12 | 38 | 16 | 2  | 36 | 155 | 77 | 29  |
| Par_prot | 0  | 0  | 0  | 0  | 0  | 0  | 0   | 0  | 0   |
| Pau_tae  | 0  | 0  | 0  | 0  | 0  | 0  | 0   | 0  | 0   |
| Pet_hume | 0  | 0  | 2  | 2  | 0  | 0  | 0   | 0  | 0   |
| Pin_app  | 0  | 0  | 0  | 0  | 0  | 0  | 0   | 0  | 0   |
| Pin_dim  | 0  | 0  | 0  | 0  | 0  | 0  | 0   | 0  | 0   |
| Pin_kroc | 0  | 0  | 0  | 0  | 0  | 0  | 0   | 0  | 0   |
| Pin_micr | 0  | 0  | 0  | 0  | 0  | 0  | 0   | 0  | 0   |
| Plc_plac | 0  | 0  | 0  | 0  | 0  | 0  | 0   | 0  | 0   |
| Plt_cons | 0  | 0  | 0  | 0  | 0  | 0  | 0   | 0  | 0   |
| Plt_deli | 3  | 2  | 13 | 12 | 15 | 38 | 4   | 4  | 10  |







| AREA<br>SITE | Kal<br>25 | Kal<br>26 | Kal<br>29 | Kal<br>30 | Kal<br>31 | Kal<br>32 |
|--------------|-----------|-----------|-----------|-----------|-----------|-----------|
| Acd_exil     | 0         | 0         | 0         | 0         | 0         | 0         |
| Acd_minu     | 2         | 0         | 0         | 0         | 0         | 0         |
| Acd_pyre     | 0         | 0         | 0         | 0         | 0         | 0         |
| Ach_brev     | 0         | 0         | 0         | 0         | 0         | 0         |
| Ach_brin     | 1         | 2         | 0         | 0         | 0         | 0         |
| Ach_foge     | 0         | 0         | 0         | 0         | 0         | 0         |
| Ach_leon     | 0         | 0         | 0         | 0         | 0         | 0         |
| Ach_long     | 0         | 0         | 0         | 0         | 0         | 0         |
| Ach_luth     | 0         | 0         | 0         | 0         | 0         | 0         |
| Ach_misc     | 0         | 0         | 0         | 0         | 0         | 0         |
| Ach_vist     | 0         | 0         | 0         | 0         | 0         | 0         |
| Act_nosu     | 0         | 0         | 0         | 0         | 0         | 0         |
| Act_occ      | 0         | 0         | 0         | 0         | 0         | 0         |
| Ami_spec     | 0         | 6         | 0         | 0         | 0         | 0         |
| Amp_copu     | 0         | 0         | 0         | 0         | 0         | 0         |
| Amp_fleb     | 0         | 0         | 0         | 0         | 0         | 0         |
| Amp_hele     | 0         | 0         | 0         | 0         | 0         | 0         |
| Amp_inar     | 0         | 0         | 0         | 0         | 0         | 0         |
| Amp_line     | 0         | 0         | 0         | 0         | 0         | 0         |
| Amp_micr     | 0         | 0         | 0         | 0         | 0         | 0         |
| Amp_oval     | 0         | 0         | 0         | 0         | 0         | 0         |
| Amp_pedi     | 0         | 0         | 0         | 0         | 0         | 0         |
| Amp_prof     | 0         | 0         | 0         | 0         | 4         | 0         |
| Ane_mino     | 0         | 0         | 0         | 0         | 0         | 0         |
| Ane_tusc     | 0         | 0         | 0         | 0         | 0         | 0         |
| Ano_spha     | 0         | 0         | 0         | 0         | 0         | 0         |
| Asa_bahu     | 0         | 0         | 0         | 0         | 0         | 0         |
| Ast_form     | 0         | 0         | 0         | 0         | 0         | 0         |
| Aul_spp      | 0         | 0         | 0         | 0         | 0         | 0         |
| Bac_paxi     | 0         | 0         | 0         | 0         | 2         | 0         |
| Ber_fenn     | 0         | 0         | 0         | 0         | 0         | 0         |
| Ber_ruti     | 48        | 24        | 27        | 69        | 69        | 54        |
| Ber_scop     | 0         | 0         | 0         | 0         | 0         | 0         |
| Bir_luce     | 0         | 0         | 0         | 0         | 0         | 0         |
| Bra_apon     | 0         | 0         | 0         | 0         | 0         | 0         |
| Bra_vitr     | 0         | 0         | 0         | 0         | 0         | 0         |
| Bre_lanc     | 0         | 0         | 0         | 0         | 0         | 0         |
| Cal_aemu     | 0         | 0         | 0         | 0         | 0         | 0         |

|          |   |    |   |   |    |   |
|----------|---|----|---|---|----|---|
| Cal_amph | 0 | 0  | 0 | 0 | 0  | 0 |
| Cal_baci | 0 | 0  | 0 | 0 | 0  | 0 |
| Cal_cras | 0 | 0  | 0 | 0 | 0  | 0 |
| Cal_sili | 0 | 0  | 0 | 0 | 0  | 0 |
| Cam_clyp | 0 | 0  | 0 | 0 | 0  | 0 |
| Cat_adha | 0 | 0  | 0 | 0 | 0  | 0 |
| Cav_lapi | 0 | 0  | 0 | 0 | 0  | 0 |
| Cav_pseu | 0 | 0  | 0 | 0 | 0  | 0 |
| Cer_clos | 0 | 0  | 0 | 0 | 0  | 0 |
| Chp_clam | 0 | 0  | 0 | 0 | 0  | 0 |
| Chp_marg | 0 | 0  | 0 | 0 | 0  | 0 |
| Coc_cost | 0 | 0  | 0 | 1 | 0  | 0 |
| Coc_neot | 0 | 0  | 0 | 3 | 7  | 0 |
| Coc_pedi | 4 | 10 | 1 | 4 | 14 | 2 |
| Coc_pelt | 0 | 0  | 0 | 0 | 0  | 0 |
| Coc_plac | 1 | 5  | 0 | 1 | 0  | 4 |
| Coc_pleu | 0 | 0  | 1 | 0 | 0  | 0 |
| Coc_plli | 0 | 0  | 0 | 1 | 0  | 0 |
| Coc_psli | 0 | 0  | 0 | 0 | 0  | 2 |
| Coc_psth | 0 | 0  | 0 | 0 | 0  | 0 |
| Coc_scut | 0 | 0  | 0 | 0 | 10 | 0 |
| Coc_stau | 0 | 0  | 0 | 1 | 15 | 0 |
| Com_pusi | 0 | 0  | 0 | 0 | 0  | 0 |
| Cos_aste | 0 | 0  | 0 | 0 | 2  | 0 |
| Cte_pulc | 0 | 0  | 0 | 5 | 0  | 1 |
| Cyc_atom | 0 | 13 | 0 | 0 | 0  | 0 |
| Cyc_choc | 4 | 14 | 8 | 0 | 0  | 0 |
| Cyc_mene | 0 | 0  | 0 | 0 | 0  | 0 |
| Cyc_radi | 0 | 0  | 0 | 0 | 0  | 0 |
| Cyc_ross | 0 | 0  | 0 | 0 | 0  | 0 |
| Cyc_stel | 0 | 0  | 0 | 0 | 0  | 0 |
| Cyc_stri | 0 | 0  | 0 | 0 | 0  | 0 |
| Cyc_trip | 0 | 0  | 0 | 0 | 0  | 0 |
| Cym_affi | 0 | 0  | 0 | 0 | 0  | 0 |
| Cym_cist | 0 | 0  | 0 | 0 | 0  | 0 |
| Cym_helv | 0 | 0  | 0 | 0 | 0  | 0 |
| Cym_lanc | 0 | 0  | 0 | 0 | 0  | 0 |
| Cym_prox | 0 | 0  | 0 | 0 | 0  | 0 |
| Cyp_sole | 0 | 0  | 0 | 0 | 0  | 0 |
| Cys_dubi | 0 | 0  | 0 | 0 | 0  | 0 |
| Den_tecr | 0 | 0  | 0 | 0 | 0  | 0 |

|           |    |   |   |    |    |    |
|-----------|----|---|---|----|----|----|
| Dia_bott  | 0  | 0 | 0 | 0  | 0  | 0  |
| Dia_moni  | 27 | 0 | 4 | 11 | 25 | 37 |
| Dia_prob  | 0  | 0 | 0 | 0  | 0  | 0  |
| Dia_tenu  | 0  | 0 | 0 | 0  | 0  | 0  |
| Dia_vulg  | 0  | 0 | 0 | 0  | 0  | 0  |
| Dic_subi  | 0  | 0 | 0 | 0  | 0  | 0  |
| Dip_depa  | 2  | 0 | 0 | 0  | 0  | 0  |
| Dip_dydi  | 0  | 0 | 0 | 0  | 0  | 0  |
| Dip_elli  | 0  | 0 | 0 | 0  | 0  | 0  |
| Dip_inte  | 0  | 0 | 0 | 0  | 0  | 0  |
| Dip_ocul  | 0  | 0 | 0 | 0  | 0  | 0  |
| Dip_smdi  | 0  | 0 | 0 | 0  | 0  | 0  |
| Dip_smpu  | 0  | 0 | 0 | 0  | 0  | 0  |
| Dip_smrh  | 0  | 0 | 0 | 0  | 0  | 0  |
| Dip_subo  | 0  | 0 | 0 | 0  | 0  | 0  |
| Enc_caes  | 0  | 0 | 0 | 0  | 0  | 0  |
| Enc_lacu  | 0  | 0 | 0 | 0  | 0  | 0  |
| Enc_minu  | 0  | 0 | 0 | 0  | 0  | 0  |
| Enc_obsc  | 0  | 0 | 0 | 0  | 0  | 0  |
| Enc_pros  | 0  | 0 | 0 | 0  | 0  | 0  |
| Enc_sile  | 0  | 0 | 0 | 0  | 0  | 0  |
| Enc_tenu  | 0  | 0 | 0 | 0  | 0  | 0  |
| Enp_behr  | 0  | 0 | 0 | 0  | 0  | 0  |
| Enp_kram  | 0  | 0 | 0 | 0  | 0  | 0  |
| Ent_palu  | 0  | 0 | 0 | 0  | 0  | 0  |
| Ent_pseu  | 0  | 0 | 0 | 0  | 0  | 0  |
| Ent_punc  | 0  | 0 | 0 | 0  | 0  | 0  |
| Epi_adna  | 0  | 0 | 0 | 0  | 0  | 0  |
| Epi_goep  | 0  | 0 | 0 | 0  | 0  | 0  |
| Epi_sore  | 9  | 3 | 0 | 0  | 0  | 10 |
| Epi_turg  | 3  | 0 | 0 | 0  | 1  | 0  |
| Epi_tuwe  | 0  | 0 | 0 | 2  | 2  | 2  |
| Euc_laev  | 0  | 0 | 0 | 0  | 0  | 0  |
| Eun_arcu  | 0  | 0 | 0 | 0  | 0  | 0  |
| Eun_peun  | 0  | 0 | 0 | 0  | 0  | 0  |
| Fal_clep  | 0  | 2 | 0 | 0  | 0  | 0  |
| Fal_cryp  | 0  | 2 | 0 | 0  | 0  | 0  |
| Fal_flor  | 0  | 0 | 0 | 0  | 0  | 0  |
| Fal_psnny | 0  | 0 | 0 | 0  | 0  | 0  |
| Fal_pygm  | 2  | 0 | 0 | 0  | 0  | 0  |
| Fis_sapr  | 0  | 0 | 0 | 0  | 0  | 0  |

|          |    |   |   |    |    |    |
|----------|----|---|---|----|----|----|
| Fra_amic | 0  | 0 | 0 | 0  | 0  | 0  |
| Fra_capu | 0  | 0 | 0 | 0  | 0  | 0  |
| Fra_caru | 10 | 0 | 8 | 0  | 0  | 0  |
| Fra_cava | 0  | 0 | 0 | 0  | 0  | 0  |
| Fra_cons | 0  | 0 | 0 | 0  | 0  | 0  |
| Fra_geda | 0  | 0 | 0 | 0  | 0  | 0  |
| Fra_grac | 0  | 0 | 0 | 0  | 0  | 0  |
| Fra_hydu | 0  | 0 | 0 | 9  | 88 | 0  |
| Fra_lept | 0  | 0 | 0 | 0  | 0  | 0  |
| Fra_nitz | 0  | 0 | 0 | 0  | 0  | 0  |
| Frp_cyli | 0  | 0 | 0 | 0  | 0  | 0  |
| Fru_vulg | 0  | 1 | 0 | 0  | 0  | 0  |
| Gom_clav | 0  | 0 | 0 | 0  | 0  | 0  |
| Gom_intr | 0  | 0 | 0 | 0  | 0  | 0  |
| Gom_oliv | 0  | 0 | 0 | 14 | 19 | 0  |
| Gom_parv | 0  | 0 | 0 | 0  | 0  | 0  |
| Gon_exig | 0  | 0 | 0 | 6  | 21 | 16 |
| Gos_expl | 0  | 0 | 0 | 0  | 18 | 0  |
| Gos_obsc | 0  | 0 | 0 | 0  | 0  | 2  |
| Gra_mari | 0  | 0 | 0 | 0  | 0  | 0  |
| Gra_ocea | 1  | 0 | 0 | 0  | 0  | 0  |
| Gyr_acum | 0  | 0 | 0 | 0  | 0  | 0  |
| Gyr_atte | 0  | 0 | 0 | 0  | 0  | 0  |
| Gyr_stri | 0  | 0 | 0 | 0  | 0  | 0  |
| Gyr_tenu | 0  | 0 | 0 | 0  | 0  | 0  |
| Hal_coff | 2  | 4 | 0 | 0  | 0  | 0  |
| Hal_exig | 0  | 0 | 0 | 0  | 0  | 0  |
| Hal_hols | 0  | 0 | 0 | 0  | 0  | 0  |
| Hal_hybr | 0  | 0 | 0 | 0  | 0  | 0  |
| Hal_luci | 0  | 4 | 2 | 0  | 2  | 0  |
| Hal_norm | 0  | 0 | 0 | 0  | 0  | 0  |
| Hal_subh | 0  | 0 | 0 | 0  | 0  | 0  |
| Hal_tene | 10 | 0 | 0 | 0  | 0  | 0  |
| Hal_vene | 0  | 0 | 0 | 0  | 0  | 0  |
| Han_balt | 0  | 0 | 0 | 0  | 0  | 0  |
| Has_spic | 0  | 0 | 0 | 0  | 0  | 0  |
| Hip_capi | 0  | 0 | 0 | 0  | 0  | 0  |
| Hip_hung | 0  | 0 | 0 | 0  | 0  | 0  |
| Hip_lesm | 0  | 0 | 0 | 0  | 0  | 0  |
| Kar_amoe | 0  | 0 | 0 | 0  | 0  | 0  |
| Kar_clev | 0  | 0 | 0 | 0  | 0  | 0  |

|           |    |   |     |    |    |     |
|-----------|----|---|-----|----|----|-----|
| Kar_niti  | 0  | 0 | 0   | 0  | 0  | 0   |
| Kar_subm  | 8  | 0 | 0   | 0  | 0  | 0   |
| Lemn_hung | 0  | 0 | 0   | 0  | 0  | 0   |
| Lic_debi  | 0  | 0 | 0   | 0  | 0  | 0   |
| Lic_gran  | 0  | 0 | 0   | 0  | 3  | 1   |
| Lic_oedi  | 0  | 0 | 0   | 0  | 0  | 0   |
| Lic_rhom  | 0  | 0 | 0   | 0  | 0  | 0   |
| Lun_bise  | 0  | 0 | 0   | 0  | 2  | 0   |
| Lut_muti  | 0  | 0 | 0   | 0  | 0  | 0   |
| Mar_atom  | 0  | 0 | 227 | 83 | 31 | 131 |
| Mar_mart  | 0  | 0 | 0   | 0  | 0  | 0   |
| Mar_schu  | 0  | 0 | 0   | 0  | 0  | 0   |
| Mas_balt  | 0  | 0 | 0   | 0  | 0  | 0   |
| Mas_brau  | 0  | 0 | 0   | 0  | 0  | 0   |
| Mas_elli  | 0  | 2 | 0   | 0  | 0  | 0   |
| Mas_exig  | 4  | 0 | 0   | 4  | 0  | 0   |
| Mas_pumi  | 0  | 2 | 0   | 0  | 0  | 0   |
| Mas_pusi  | 0  | 0 | 0   | 0  | 0  | 0   |
| Mas_smam  | 0  | 0 | 0   | 0  | 0  | 0   |
| Mas_smit  | 0  | 4 | 0   | 0  | 0  | 0   |
| Mel_arct  | 0  | 0 | 0   | 0  | 0  | 0   |
| Mel_line  | 16 | 5 | 7   | 0  | 0  | 3   |
| Mel_moni  | 0  | 0 | 0   | 0  | 1  | 0   |
| Mel_numm  | 2  | 0 | 0   | 2  | 0  | 0   |
| Mel_vari  | 0  | 0 | 0   | 0  | 0  | 0   |
| Nav_aren  | 0  | 0 | 0   | 0  | 0  | 0   |
| Nav_bipu  | 0  | 0 | 0   | 0  | 0  | 0   |
| Nav_boss  | 0  | 0 | 0   | 4  | 6  | 0   |
| Nav_bott  | 0  | 0 | 0   | 12 | 2  | 0   |
| Nav_brem  | 0  | 0 | 0   | 0  | 0  | 0   |
| Nav_capi  | 0  | 0 | 0   | 0  | 0  | 0   |
| Nav_cinc  | 0  | 0 | 0   | 0  | 0  | 0   |
| Nav_clem  | 0  | 0 | 0   | 0  | 0  | 0   |
| Nav_cryp  | 0  | 0 | 0   | 0  | 0  | 0   |
| Nav_digi  | 0  | 2 | 0   | 0  | 0  | 0   |
| Nav_duer  | 0  | 0 | 0   | 0  | 0  | 0   |
| Nav_eidr  | 0  | 0 | 0   | 0  | 0  | 0   |
| Nav_flan  | 0  | 0 | 0   | 0  | 0  | 0   |
| Nav_geii  | 0  | 0 | 0   | 0  | 0  | 0   |
| Nav_gepo  | 0  | 0 | 0   | 0  | 0  | 0   |
| Nav_greg  | 0  | 0 | 2   | 0  | 0  | 0   |

|          |    |   |    |     |    |     |
|----------|----|---|----|-----|----|-----|
| Nav_haca | 0  | 0 | 0  | 0   | 0  | 0   |
| Nav_hani | 0  | 0 | 0  | 0   | 0  | 0   |
| Nav_hust | 0  | 0 | 0  | 0   | 0  | 0   |
| Nav_lanc | 0  | 0 | 0  | 0   | 0  | 0   |
| Nav_late | 0  | 0 | 0  | 0   | 0  | 0   |
| Nav_marg | 0  | 0 | 0  | 0   | 0  | 0   |
| Nav_meni | 0  | 0 | 0  | 0   | 0  | 0   |
| Nav_midi | 0  | 0 | 0  | 0   | 0  | 0   |
| Nav_nole | 0  | 0 | 0  | 0   | 0  | 0   |
| Nav_oblo | 0  | 0 | 0  | 0   | 0  | 0   |
| Nav_oest | 0  | 0 | 0  | 0   | 0  | 0   |
| Nav_pere | 0  | 0 | 0  | 0   | 0  | 0   |
| Nav_perm | 0  | 4 | 11 | 107 | 81 | 111 |
| Nav_phyl | 15 | 7 | 4  | 1   | 1  | 2   |
| Nav_port | 0  | 0 | 0  | 0   | 0  | 0   |
| Nav_radi | 0  | 0 | 0  | 0   | 0  | 0   |
| Nav_ramo | 0  | 0 | 0  | 21  | 28 | 34  |
| Nav_rato | 0  | 0 | 0  | 0   | 0  | 0   |
| Nav_rece | 0  | 0 | 0  | 0   | 0  | 0   |
| Nav_rhyn | 0  | 6 | 4  | 0   | 0  | 1   |
| Nav_sana | 0  | 0 | 0  | 0   | 0  | 0   |
| Nav_sjoe | 0  | 0 | 0  | 0   | 0  | 2   |
| Nav_star | 0  | 0 | 0  | 0   | 0  | 0   |
| Nav_subr | 0  | 0 | 0  | 0   | 0  | 0   |
| Nav_supr | 0  | 0 | 0  | 0   | 0  | 0   |
| Nav_trip | 0  | 0 | 0  | 0   | 0  | 0   |
| Nav_vene | 0  | 0 | 0  | 0   | 0  | 0   |
| Ncy_pusi | 0  | 6 | 0  | 0   | 0  | 0   |
| Nit_acic | 0  | 0 | 0  | 0   | 0  | 0   |
| Nit_anfo | 0  | 0 | 0  | 0   | 0  | 0   |
| Nit_anla | 0  | 0 | 0  | 0   | 0  | 0   |
| Nit_arch | 0  | 0 | 0  | 0   | 0  | 0   |
| Nit_aura | 0  | 0 | 0  | 0   | 0  | 0   |
| Nit_baci | 0  | 0 | 0  | 0   | 0  | 0   |
| Nit_dime | 0  | 0 | 0  | 0   | 0  | 0   |
| Nit_dipp | 0  | 0 | 0  | 0   | 0  | 0   |
| Nit_diss | 0  | 0 | 0  | 0   | 0  | 0   |
| Nit_dist | 0  | 0 | 0  | 0   | 0  | 0   |
| Nit_dubi | 0  | 0 | 0  | 0   | 0  | 0   |
| Nit_eleg | 0  | 0 | 0  | 0   | 0  | 0   |
| Nit_frig | 0  | 0 | 0  | 0   | 0  | 0   |

|           |    |    |     |    |    |    |
|-----------|----|----|-----|----|----|----|
| Nit_frus  | 0  | 16 | 14  | 22 | 7  | 0  |
| Nit_gros  | 0  | 0  | 0   | 0  | 0  | 0  |
| Nit_heuf  | 0  | 0  | 0   | 0  | 0  | 0  |
| Nit_inco  | 20 | 6  | 0   | 8  | 37 | 57 |
| Nit_inte  | 0  | 0  | 0   | 0  | 0  | 0  |
| Nit_lieb  | 0  | 0  | 0   | 0  | 0  | 0  |
| Nit_lisu  | 0  | 0  | 0   | 0  | 0  | 0  |
| Nit_lore  | 0  | 0  | 0   | 0  | 0  | 0  |
| Nit_micr  | 0  | 0  | 8   | 4  | 7  | 4  |
| Nit_pale  | 0  | 0  | 0   | 0  | 0  | 0  |
| Nit_pcea  | 0  | 0  | 0   | 0  | 0  | 0  |
| Nit_pell  | 0  | 0  | 0   | 0  | 0  | 0  |
| Nit_perm  | 0  | 0  | 0   | 0  | 0  | 0  |
| Nit_pusi  | 0  | 0  | 0   | 2  | 0  | 0  |
| Nit_rect  | 0  | 0  | 0   | 0  | 0  | 0  |
| Nit_rose  | 0  | 0  | 0   | 0  | 0  | 0  |
| Nit_saco  | 0  | 0  | 0   | 0  | 0  | 0  |
| Nit_sdea  | 0  | 0  | 0   | 0  | 0  | 0  |
| Nit_sigm  | 0  | 0  | 0   | 0  | 0  | 0  |
| Nit_soci  | 0  | 0  | 0   | 0  | 0  | 0  |
| Nit_soli  | 0  | 0  | 0   | 0  | 0  | 0  |
| Nit_subl  | 0  | 0  | 0   | 0  | 0  | 0  |
| Nit_ther  | 0  | 0  | 0   | 0  | 0  | 0  |
| Nit_umbo  | 0  | 0  | 0   | 0  | 0  | 0  |
| Nit_vald  | 0  | 0  | 0   | 0  | 0  | 0  |
| Nit_verm  | 0  | 0  | 0   | 0  | 0  | 0  |
| Nit_vitr  | 0  | 0  | 0   | 0  | 0  | 0  |
| Nit_wuel  | 0  | 0  | 0   | 0  | 0  | 0  |
| Ope_krum  | 88 | 62 | 122 | 58 | 10 | 44 |
| Ope_muta  | 13 | 28 | 64  | 17 | 4  | 9  |
| Par_prot  | 0  | 0  | 0   | 0  | 0  | 0  |
| Pau_taan  | 0  | 0  | 0   | 0  | 0  | 0  |
| Pet_hume  | 0  | 0  | 0   | 0  | 0  | 0  |
| Pin_apppe | 0  | 0  | 0   | 0  | 0  | 0  |
| Pin_dimi  | 0  | 0  | 0   | 0  | 0  | 0  |
| Pin_kroc  | 0  | 0  | 0   | 0  | 0  | 0  |
| Pin_micr  | 0  | 0  | 0   | 0  | 0  | 0  |
| Plc_plac  | 0  | 0  | 0   | 0  | 0  | 0  |
| Plt_cons  | 0  | 0  | 0   | 0  | 0  | 0  |
| Plt_deli  | 2  | 0  | 19  | 0  | 1  | 4  |
| Plt_disp  | 0  | 0  | 0   | 0  | 0  | 0  |



|          |     |     |     |     |     |     |
|----------|-----|-----|-----|-----|-----|-----|
| Plt_freq | 0   | 0   | 0   | 0   | 0   | 0   |
| Plt_hauc | 0   | 0   | 0   | 0   | 0   | 0   |
| Plt_lanc | 0   | 0   | 0   | 0   | 0   | 0   |
| Plt_lemm | 5   | 4   | 0   | 0   | 0   | 0   |
| Plt_link | 0   | 0   | 0   | 0   | 0   | 0   |
| Plt_peri | 0   | 0   | 0   | 0   | 0   | 0   |
| Plt_rost | 0   | 0   | 0   | 0   | 0   | 0   |
| Plt_sept | 21  | 0   | 0   | 0   | 0   | 2   |
| Psf_tene | 0   | 0   | 3   | 0   | 0   | 0   |
| Pss_brev | 7   | 0   | 61  | 0   | 0   | 0   |
| Pss_brin | 0   | 0   | 0   | 0   | 0   | 0   |
| Pss_elli | 175 | 269 | 255 | 45  | 34  | 113 |
| Pss_perm | 0   | 0   | 0   | 0   | 0   | 0   |
| Pss_robu | 0   | 0   | 0   | 0   | 0   | 0   |
| Pss_subs | 195 | 189 | 20  | 0   | 0   | 13  |
| Pss_zeil | 266 | 248 | 41  | 2   | 0   | 17  |
| Pst_bior | 0   | 0   | 0   | 0   | 0   | 0   |
| Pst_oblo | 0   | 0   | 0   | 0   | 0   | 0   |
| Pst_punc | 0   | 0   | 0   | 0   | 0   | 0   |
| Pst_ross | 0   | 0   | 0   | 0   | 0   | 0   |
| Pst_sacc | 0   | 0   | 0   | 0   | 0   | 0   |
| Pte_inan | 3   | 0   | 0   | 0   | 6   | 0   |
| Rei_sinu | 0   | 0   | 0   | 0   | 0   | 0   |
| Rho_abbr | 13  | 0   | 4   | 191 | 129 | 58  |
| Rhp_acum | 2   | 0   | 0   | 0   | 0   | 0   |
| Rhp_breb | 6   | 0   | 0   | 0   | 0   | 0   |
| Rhp_gibb | 0   | 0   | 0   | 0   | 0   | 0   |
| Sel_pupu | 0   | 0   | 0   | 0   | 0   | 0   |
| Sel_stro | 0   | 0   | 0   | 0   | 0   | 0   |
| Ske_cost | 0   | 0   | 0   | 0   | 0   | 0   |
| Ske_subs | 0   | 0   | 0   | 0   | 0   | 0   |
| Sla_lapp | 0   | 0   | 0   | 0   | 0   | 0   |
| Std_hant | 0   | 0   | 0   | 0   | 0   | 0   |
| Std_parv | 0   | 0   | 0   | 0   | 0   | 0   |
| Stn_legu | 0   | 0   | 0   | 0   | 0   | 0   |
| Stn_phoe | 0   | 2   | 0   | 0   | 0   | 0   |
| Stn_simu | 0   | 0   | 0   | 4   | 0   | 0   |
| Stn_smka | 0   | 0   | 0   | 0   | 0   | 0   |
| Stp_anus | 0   | 0   | 0   | 0   | 0   | 0   |
| Stp_wisl | 0   | 0   | 0   | 0   | 0   | 0   |
| Sts_punc | 0   | 47  | 34  | 0   | 10  | 41  |

|          |    |   |    |     |     |     |
|----------|----|---|----|-----|-----|-----|
| Sts_vent | 0  | 0 | 0  | 0   | 0   | 0   |
| Sur_angu | 0  | 0 | 0  | 0   | 0   | 0   |
| Sur_brba | 0  | 0 | 0  | 0   | 0   | 0   |
| Sur_breb | 0  | 0 | 5  | 0   | 0   | 0   |
| Sur_minu | 0  | 0 | 0  | 0   | 0   | 0   |
| Sur_oval | 0  | 0 | 0  | 0   | 0   | 0   |
| Syn_acus | 0  | 0 | 0  | 0   | 0   | 0   |
| Syn_ulna | 0  | 0 | 0  | 0   | 0   | 0   |
| Tab_fasc | 0  | 0 | 36 | 209 | 101 | 146 |
| Tab_kten | 0  | 0 | 4  | 0   | 1   | 0   |
| Tab_laev | 0  | 0 | 0  | 0   | 0   | 0   |
| Tab_tabu | 12 | 0 | 0  | 0   | 0   | 3   |
| Tab_waer | 0  | 0 | 4  | 77  | 197 | 70  |
| Tal_fene | 0  | 0 | 0  | 0   | 0   | 0   |
| Tal_floc | 0  | 0 | 0  | 0   | 0   | 0   |
| Tet_glan | 0  | 0 | 0  | 0   | 0   | 0   |
| Tha_balt | 0  | 0 | 0  | 0   | 0   | 2   |
| Tha_hyla | 0  | 1 | 0  | 0   | 0   | 0   |
| Tha_leva | 1  | 0 | 0  | 0   | 2   | 2   |
| Tha_pros | 0  | 0 | 0  | 0   | 0   | 0   |
| Tha_pseu | 0  | 0 | 0  | 0   | 0   | 0   |
| Tha_punc | 0  | 0 | 0  | 0   | 0   | 0   |
| Try_angu | 0  | 0 | 0  | 0   | 0   | 0   |
| Try_apic | 0  | 0 | 0  | 0   | 0   | 0   |
| Try_ardu | 0  | 0 | 0  | 0   | 0   | 0   |
| Try_hung | 0  | 0 | 0  | 0   | 0   | 0   |
| Try_levi | 0  | 0 | 0  | 0   | 0   | 0   |
| Try_lite | 0  | 0 | 0  | 0   | 0   | 0   |
| Try_sali | 0  | 0 | 0  | 0   | 0   | 0   |
| Try_scal | 0  | 0 | 0  | 0   | 0   | 0   |









|           |    |    |    |    |    |    |    |    |     |    |    |
|-----------|----|----|----|----|----|----|----|----|-----|----|----|
| Kar_niti  | 0  | 0  | 0  | 0  | 0  | 0  | 0  | 0  | 0   | 0  | 0  |
| Kar_subm  | 0  | 0  | 0  | 0  | 0  | 0  | 0  | 0  | 0   | 0  | 0  |
| Lemn_hung | 0  | 0  | 0  | 0  | 0  | 0  | 0  | 0  | 0   | 0  | 0  |
| Lic_debi  | 0  | 0  | 0  | 0  | 0  | 0  | 0  | 0  | 0   | 0  | 0  |
| Lic_gran  | 2  | 10 | 0  | 9  | 4  | 1  | 0  | 1  | 0   | 55 | 3  |
| Lic_oedi  | 0  | 0  | 0  | 0  | 0  | 0  | 0  | 0  | 0   | 0  | 7  |
| Lic_rhom  | 0  | 0  | 0  | 0  | 0  | 0  | 0  | 0  | 0   | 0  | 0  |
| Lun_bise  | 0  | 0  | 0  | 0  | 0  | 0  | 0  | 0  | 0   | 0  | 0  |
| Lut_muti  | 0  | 0  | 0  | 0  | 0  | 0  | 0  | 0  | 0   | 0  | 0  |
| Mar_atom  | 54 | 23 | 12 | 18 | 68 | 26 | 45 | 36 | 116 | 0  | 14 |
| Mar_mart  | 0  | 0  | 0  | 0  | 0  | 0  | 0  | 0  | 0   | 0  | 0  |
| Mar_schu  | 0  | 0  | 2  | 2  | 0  | 0  | 0  | 0  | 0   | 0  | 0  |
| Mas_balt  | 0  | 0  | 0  | 0  | 0  | 0  | 0  | 0  | 0   | 0  | 0  |
| Mas_brau  | 0  | 0  | 0  | 0  | 0  | 0  | 0  | 0  | 0   | 0  | 0  |
| Mas_elli  | 2  | 2  | 0  | 0  | 0  | 3  | 0  | 0  | 0   | 0  | 0  |
| Mas_exig  | 0  | 0  | 0  | 0  | 0  | 0  | 0  | 0  | 0   | 0  | 0  |
| Mas_pumi  | 0  | 0  | 0  | 0  | 0  | 17 | 2  | 0  | 0   | 0  | 0  |
| Mas_pusi  | 0  | 0  | 0  | 0  | 0  | 0  | 0  | 0  | 0   | 0  | 0  |
| Mas_smam  | 0  | 0  | 0  | 0  | 0  | 0  | 0  | 0  | 0   | 0  | 0  |
| Mas_smit  | 0  | 3  | 0  | 0  | 0  | 0  | 0  | 0  | 0   | 0  | 0  |
| Mel_arct  | 0  | 0  | 0  | 0  | 0  | 0  | 0  | 0  | 0   | 0  | 0  |
| Mel_line  | 1  | 1  | 3  | 3  | 0  | 0  | 0  | 0  | 0   | 0  | 0  |
| Mel_moni  | 0  | 9  | 1  | 0  | 17 | 20 | 32 | 1  | 4   | 0  | 0  |
| Mel_numm  | 2  | 7  | 0  | 0  | 2  | 0  | 7  | 1  | 0   | 3  | 5  |
| Mel_vari  | 0  | 0  | 0  | 0  | 0  | 0  | 0  | 0  | 0   | 0  | 0  |
| Nav_aren  | 0  | 0  | 0  | 0  | 0  | 0  | 0  | 0  | 0   | 0  | 0  |
| Nav_bipu  | 0  | 0  | 0  | 0  | 0  | 0  | 0  | 0  | 0   | 0  | 0  |
| Nav_boss  | 0  | 0  | 0  | 0  | 0  | 0  | 0  | 0  | 0   | 0  | 0  |
| Nav_bott  | 0  | 2  | 0  | 1  | 0  | 2  | 0  | 0  | 0   | 21 | 0  |
| Nav_brem  | 0  | 0  | 0  | 0  | 0  | 0  | 0  | 0  | 0   | 0  | 0  |
| Nav_capi  | 0  | 0  | 0  | 0  | 0  | 0  | 0  | 0  | 0   | 0  | 0  |
| Nav_cinc  | 0  | 0  | 0  | 0  | 0  | 0  | 0  | 0  | 0   | 0  | 0  |
| Nav_clem  | 0  | 0  | 2  | 0  | 0  | 0  | 0  | 0  | 0   | 0  | 0  |
| Nav_cryp  | 0  | 0  | 0  | 8  | 0  | 0  | 0  | 0  | 0   | 0  | 0  |
| Nav_digi  | 0  | 0  | 0  | 0  | 0  | 0  | 0  | 0  | 0   | 0  | 0  |
| Nav_duer  | 0  | 0  | 0  | 0  | 0  | 0  | 0  | 0  | 0   | 0  | 0  |
| Nav_eidr  | 0  | 0  | 0  | 0  | 0  | 0  | 0  | 0  | 0   | 0  | 0  |
| Nav_flan  | 0  | 0  | 0  | 0  | 0  | 0  | 0  | 0  | 0   | 0  | 0  |
| Nav_geii  | 0  | 0  | 0  | 0  | 0  | 0  | 0  | 0  | 0   | 0  | 0  |
| Nav_gepo  | 0  | 0  | 0  | 0  | 0  | 0  | 0  | 0  | 0   | 0  | 0  |
| Nav_greg  | 23 | 1  | 23 | 23 | 18 | 8  | 0  | 0  | 0   | 0  | 1  |







|          |    |    |    |    |    |    |    |     |     |     |     |
|----------|----|----|----|----|----|----|----|-----|-----|-----|-----|
| Plt_freq | 0  | 0  | 0  | 0  | 0  | 0  | 0  | 0   | 0   | 0   | 0   |
| Plt_hauc | 0  | 0  | 0  | 0  | 0  | 1  | 0  | 0   | 1   | 0   | 0   |
| Plt_lanc | 0  | 0  | 0  | 0  | 0  | 0  | 0  | 0   | 0   | 0   | 0   |
| Plt_lemm | 0  | 0  | 5  | 2  | 0  | 0  | 0  | 0   | 2   | 0   | 0   |
| Plt_link | 0  | 0  | 0  | 0  | 0  | 0  | 0  | 0   | 0   | 0   | 0   |
| Plt_peri | 0  | 0  | 0  | 0  | 0  | 0  | 0  | 0   | 0   | 0   | 0   |
| Plt_rost | 0  | 0  | 0  | 0  | 0  | 0  | 0  | 0   | 0   | 0   | 0   |
| Plt_sept | 1  | 0  | 0  | 0  | 0  | 0  | 0  | 0   | 0   | 0   | 0   |
| Psf_tene | 0  | 0  | 3  | 0  | 1  | 0  | 1  | 0   | 3   | 0   | 0   |
| Pss_brev | 2  | 0  | 4  | 4  | 18 | 18 | 34 | 0   | 52  | 0   | 0   |
| Pss_brin | 0  | 0  | 0  | 0  | 0  | 0  | 0  | 0   | 0   | 0   | 0   |
| Pss_elli | 60 | 28 | 9  | 2  | 80 | 27 | 34 | 22  | 71  | 10  | 16  |
| Pss_perm | 0  | 0  | 0  | 0  | 0  | 0  | 0  | 0   | 0   | 0   | 0   |
| Pss_robu | 0  | 0  | 0  | 0  | 0  | 0  | 0  | 0   | 0   | 0   | 0   |
| Pss_subs | 0  | 0  | 1  | 2  | 10 | 4  | 0  | 0   | 93  | 2   | 4   |
| Pss_zeil | 4  | 6  | 11 | 3  | 15 | 22 | 28 | 4   | 221 | 0   | 14  |
| Pst_bior | 0  | 0  | 1  | 0  | 0  | 0  | 0  | 0   | 0   | 0   | 0   |
| Pst_oblo | 0  | 0  | 0  | 0  | 0  | 0  | 0  | 0   | 0   | 0   | 0   |
| Pst_punc | 4  | 0  | 5  | 0  | 4  | 0  | 0  | 1   | 4   | 0   | 0   |
| Pst_ross | 0  | 0  | 0  | 0  | 0  | 0  | 0  | 0   | 0   | 0   | 0   |
| Pst_sacc | 0  | 0  | 0  | 0  | 0  | 0  | 0  | 0   | 0   | 0   | 0   |
| Pte_inan | 0  | 0  | 0  | 0  | 0  | 0  | 0  | 0   | 0   | 0   | 0   |
| Rei_sinu | 0  | 0  | 0  | 0  | 0  | 0  | 0  | 0   | 0   | 0   | 0   |
| Rho_abbr | 31 | 50 | 62 | 89 | 26 | 88 | 31 | 135 | 24  | 153 | 171 |
| Rhp_acum | 0  | 0  | 0  | 0  | 0  | 0  | 0  | 0   | 0   | 0   | 0   |
| Rhp_breb | 0  | 0  | 0  | 0  | 0  | 2  | 0  | 0   | 0   | 0   | 0   |
| Rhp_gibb | 0  | 0  | 0  | 0  | 0  | 0  | 0  | 0   | 0   | 0   | 0   |
| Sel_pupu | 0  | 0  | 0  | 0  | 0  | 0  | 0  | 0   | 0   | 0   | 0   |
| Sel_stro | 0  | 0  | 0  | 0  | 0  | 0  | 0  | 0   | 0   | 0   | 0   |
| Ske_cost | 0  | 4  | 1  | 11 | 2  | 0  | 0  | 0   | 0   | 0   | 0   |
| Ske_subs | 0  | 0  | 0  | 0  | 0  | 0  | 0  | 0   | 0   | 0   | 0   |
| Sla_lapp | 0  | 0  | 0  | 0  | 0  | 0  | 0  | 0   | 0   | 0   | 0   |
| Std_hant | 0  | 0  | 0  | 0  | 0  | 0  | 0  | 0   | 0   | 0   | 0   |
| Std_parv | 0  | 0  | 0  | 0  | 0  | 0  | 0  | 0   | 0   | 0   | 0   |
| Stn_legu | 0  | 0  | 0  | 0  | 0  | 0  | 0  | 0   | 0   | 0   | 0   |
| Stn_phoe | 0  | 0  | 0  | 0  | 0  | 0  | 0  | 0   | 0   | 0   | 0   |
| Stn_simu | 0  | 0  | 0  | 0  | 0  | 0  | 0  | 0   | 0   | 1   | 0   |
| Stn_smka | 0  | 0  | 0  | 0  | 0  | 0  | 0  | 0   | 0   | 0   | 0   |
| Stp_anus | 0  | 0  | 0  | 0  | 0  | 0  | 0  | 0   | 4   | 0   | 0   |
| Stp_wisl | 0  | 0  | 0  | 0  | 0  | 0  | 0  | 0   | 0   | 0   | 0   |
| Sts_punc | 10 | 8  | 0  | 0  | 11 | 0  | 11 | 8   | 32  | 0   | 11  |











|           |    |    |    |    |    |    |    |    |    |   |    |    |
|-----------|----|----|----|----|----|----|----|----|----|---|----|----|
| Kar_niti  | 0  | 0  | 0  | 0  | 0  | 0  | 0  | 0  | 0  | 0 | 0  | 0  |
| Kar_subm  | 0  | 0  | 0  | 0  | 0  | 0  | 0  | 0  | 0  | 0 | 0  | 0  |
| Lemn_hung | 0  | 0  | 0  | 0  | 0  | 0  | 0  | 0  | 0  | 0 | 0  | 0  |
| Lic_debi  | 0  | 2  | 0  | 0  | 0  | 0  | 0  | 0  | 0  | 0 | 0  | 0  |
| Lic_gran  | 0  | 0  | 0  | 2  | 3  | 9  | 29 | 0  | 0  | 2 | 0  | 21 |
| Lic_oedi  | 0  | 0  | 2  | 0  | 0  | 0  | 0  | 0  | 0  | 0 | 0  | 0  |
| Lic_rhom  | 0  | 2  | 0  | 0  | 0  | 0  | 0  | 0  | 0  | 0 | 0  | 0  |
| Lun_bise  | 4  | 12 | 2  | 0  | 0  | 0  | 0  | 0  | 6  | 8 | 2  | 2  |
| Lut_muti  | 0  | 0  | 0  | 0  | 0  | 2  | 0  | 0  | 0  | 0 | 0  | 0  |
| Mar_atom  | 9  | 0  | 0  | 0  | 0  | 0  | 0  | 15 | 10 | 6 | 0  | 35 |
| Mar_mart  | 0  | 0  | 0  | 0  | 0  | 5  | 0  | 0  | 0  | 0 | 0  | 0  |
| Mar_schu  | 0  | 2  | 0  | 22 | 8  | 0  | 0  | 19 | 0  | 0 | 0  | 0  |
| Mas_balt  | 0  | 0  | 0  | 0  | 0  | 0  | 0  | 0  | 0  | 0 | 0  | 0  |
| Mas_brau  | 0  | 0  | 0  | 0  | 0  | 0  | 0  | 0  | 0  | 0 | 0  | 0  |
| Mas_elli  | 0  | 0  | 0  | 0  | 0  | 0  | 0  | 0  | 0  | 0 | 0  | 0  |
| Mas_exig  | 0  | 0  | 0  | 0  | 0  | 0  | 0  | 0  | 0  | 0 | 0  | 0  |
| Mas_pumi  | 0  | 0  | 2  | 0  | 0  | 0  | 0  | 2  | 0  | 0 | 2  | 0  |
| Mas_pusi  | 0  | 0  | 0  | 0  | 0  | 0  | 0  | 0  | 0  | 0 | 0  | 0  |
| Mas_smam  | 0  | 0  | 0  | 0  | 0  | 0  | 0  | 0  | 0  | 0 | 0  | 0  |
| Mas_smit  | 0  | 0  | 0  | 0  | 0  | 0  | 0  | 0  | 2  | 0 | 0  | 0  |
| Mel_arct  | 0  | 0  | 0  | 0  | 0  | 0  | 0  | 0  | 0  | 0 | 0  | 0  |
| Mel_line  | 1  | 0  | 0  | 0  | 0  | 0  | 0  | 0  | 0  | 0 | 0  | 0  |
| Mel_moni  | 2  | 1  | 0  | 0  | 0  | 0  | 0  | 0  | 1  | 3 | 0  | 2  |
| Mel_numm  | 2  | 0  | 0  | 0  | 0  | 0  | 2  | 0  | 0  | 0 | 0  | 0  |
| Mel_vari  | 0  | 0  | 0  | 0  | 0  | 0  | 0  | 0  | 0  | 0 | 0  | 0  |
| Nav_aren  | 0  | 2  | 0  | 0  | 0  | 0  | 0  | 0  | 0  | 0 | 0  | 0  |
| Nav_bipu  | 0  | 0  | 0  | 2  | 0  | 0  | 0  | 0  | 0  | 0 | 0  | 0  |
| Nav_boss  | 0  | 0  | 15 | 0  | 2  | 2  | 0  | 0  | 0  | 0 | 0  | 0  |
| Nav_bott  | 0  | 0  | 0  | 3  | 13 | 0  | 0  | 0  | 0  | 2 | 2  | 0  |
| Nav_brem  | 0  | 0  | 0  | 0  | 0  | 0  | 0  | 0  | 0  | 0 | 0  | 0  |
| Nav_capi  | 0  | 0  | 0  | 0  | 0  | 0  | 0  | 0  | 0  | 0 | 0  | 0  |
| Nav_cinc  | 0  | 0  | 0  | 0  | 0  | 1  | 0  | 0  | 0  | 0 | 0  | 0  |
| Nav_clem  | 0  | 2  | 0  | 0  | 0  | 2  | 0  | 0  | 0  | 0 | 0  | 0  |
| Nav_cryp  | 12 | 38 | 0  | 0  | 0  | 0  | 0  | 14 | 32 | 1 | 0  | 26 |
| Nav_digi  | 0  | 0  | 0  | 0  | 0  | 0  | 0  | 0  | 0  | 0 | 0  | 0  |
| Nav_duer  | 0  | 0  | 0  | 0  | 0  | 0  | 0  | 0  | 1  | 0 | 0  | 0  |
| Nav_eidr  | 0  | 0  | 0  | 0  | 0  | 0  | 0  | 0  | 0  | 0 | 0  | 0  |
| Nav_flan  | 3  | 0  | 0  | 0  | 0  | 2  | 1  | 1  | 0  | 0 | 0  | 1  |
| Nav_geii  | 0  | 0  | 0  | 2  | 16 | 0  | 0  | 0  | 0  | 0 | 0  | 0  |
| Nav_gepo  | 0  | 0  | 0  | 0  | 0  | 0  | 0  | 0  | 0  | 0 | 0  | 0  |
| Nav_greg  | 7  | 0  | 42 | 14 | 15 | 21 | 26 | 1  | 10 | 7 | 15 | 0  |





|          |    |     |     |     |     |     |     |     |     |     |     |     |
|----------|----|-----|-----|-----|-----|-----|-----|-----|-----|-----|-----|-----|
| Nit_frus | 9  | 66  | 43  | 6   | 10  | 31  | 79  | 11  | 20  | 11  | 37  | 15  |
| Nit_gros | 0  | 0   | 0   | 0   | 0   | 0   | 0   | 0   | 0   | 0   | 0   | 0   |
| Nit_heuf | 0  | 0   | 0   | 0   | 0   | 0   | 0   | 0   | 0   | 0   | 0   | 0   |
| Nit_inco | 70 | 235 | 199 | 380 | 298 | 155 | 266 | 356 | 259 | 240 | 210 | 102 |
| Nit_inte | 0  | 0   | 0   | 0   | 0   | 0   | 0   | 0   | 0   | 0   | 0   | 0   |
| Nit_lieb | 0  | 0   | 0   | 0   | 0   | 0   | 0   | 0   | 0   | 0   | 0   | 0   |
| Nit_lisu | 0  | 0   | 0   | 0   | 0   | 0   | 0   | 0   | 0   | 0   | 0   | 0   |
| Nit_lore | 0  | 0   | 0   | 0   | 0   | 0   | 0   | 0   | 0   | 0   | 0   | 0   |
| Nit_micr | 4  | 8   | 20  | 0   | 0   | 0   | 0   | 3   | 35  | 7   | 9   | 8   |
| Nit_pale | 0  | 0   | 0   | 0   | 0   | 0   | 0   | 0   | 0   | 0   | 0   | 0   |
| Nit_pcea | 0  | 0   | 0   | 0   | 0   | 0   | 0   | 0   | 0   | 0   | 0   | 0   |
| Nit_pell | 0  | 0   | 0   | 0   | 0   | 0   | 0   | 0   | 0   | 0   | 0   | 0   |
| Nit_perm | 0  | 0   | 0   | 0   | 0   | 0   | 0   | 0   | 0   | 0   | 0   | 0   |
| Nit_pusi | 0  | 0   | 0   | 0   | 0   | 0   | 0   | 0   | 0   | 0   | 0   | 0   |
| Nit_rect | 0  | 0   | 0   | 0   | 0   | 0   | 0   | 0   | 0   | 0   | 0   | 0   |
| Nit_rose | 0  | 0   | 0   | 0   | 0   | 0   | 0   | 0   | 0   | 0   | 0   | 0   |
| Nit_saco | 0  | 0   | 0   | 0   | 0   | 0   | 0   | 0   | 0   | 0   | 0   | 0   |
| Nit_sdea | 0  | 0   | 0   | 0   | 0   | 0   | 0   | 0   | 0   | 0   | 0   | 0   |
| Nit_sigm | 4  | 0   | 3   | 0   | 0   | 0   | 0   | 0   | 0   | 0   | 1   | 2   |
| Nit_soci | 4  | 0   | 0   | 0   | 0   | 0   | 0   | 2   | 0   | 0   | 0   | 0   |
| Nit_soli | 0  | 0   | 0   | 0   | 0   | 0   | 0   | 0   | 0   | 0   | 0   | 0   |
| Nit_subl | 0  | 0   | 0   | 0   | 0   | 0   | 0   | 0   | 0   | 0   | 0   | 0   |
| Nit_ther | 35 | 9   | 0   | 0   | 0   | 0   | 0   | 0   | 0   | 0   | 0   | 0   |
| Nit_umbo | 0  | 0   | 0   | 0   | 0   | 0   | 0   | 0   | 0   | 0   | 0   | 0   |
| Nit_vald | 0  | 16  | 0   | 0   | 0   | 4   | 2   | 0   | 7   | 41  | 0   | 0   |
| Nit_verm | 0  | 0   | 0   | 0   | 0   | 0   | 0   | 0   | 0   | 0   | 0   | 0   |
| Nit_vitr | 0  | 0   | 0   | 0   | 0   | 0   | 0   | 0   | 0   | 0   | 0   | 0   |
| Nit_wuel | 0  | 0   | 0   | 0   | 0   | 0   | 0   | 0   | 0   | 0   | 0   | 0   |
| Ope_krum | 0  | 0   | 0   | 0   | 0   | 2   | 2   | 10  | 12  | 8   | 6   | 112 |
| Ope_muta | 0  | 0   | 0   | 82  | 44  | 25  | 0   | 18  | 0   | 0   | 2   | 2   |
| Par_prot | 2  | 0   | 0   | 0   | 0   | 0   | 0   | 0   | 0   | 0   | 0   | 0   |
| Pau_tae  | 0  | 0   | 0   | 2   | 0   | 0   | 0   | 0   | 0   | 0   | 0   | 0   |
| Pet_hume | 0  | 0   | 0   | 0   | 0   | 0   | 0   | 0   | 0   | 0   | 0   | 0   |
| Pin_app  | 2  | 0   | 0   | 0   | 0   | 0   | 0   | 0   | 0   | 0   | 0   | 0   |
| Pin_dim  | 0  | 0   | 0   | 0   | 0   | 0   | 0   | 0   | 0   | 0   | 0   | 0   |
| Pin_kroc | 0  | 0   | 0   | 0   | 0   | 2   | 0   | 0   | 0   | 0   | 0   | 0   |
| Pin_micr | 0  | 0   | 0   | 0   | 0   | 0   | 0   | 0   | 0   | 0   | 0   | 0   |
| Plc_plac | 0  | 0   | 0   | 0   | 0   | 0   | 0   | 0   | 0   | 0   | 0   | 0   |
| Plt_cons | 0  | 0   | 0   | 0   | 0   | 0   | 0   | 0   | 0   | 0   | 0   | 0   |
| Plt_deli | 22 | 33  | 22  | 52  | 30  | 54  | 43  | 52  | 9   | 44  | 8   | 25  |
| Plt_disp | 0  | 0   | 0   | 0   | 0   | 0   | 0   | 0   | 1   | 0   | 1   | 4   |

|          |    |    |    |    |    |    |    |    |    |    |     |    |
|----------|----|----|----|----|----|----|----|----|----|----|-----|----|
| Plt_freq | 0  | 0  | 0  | 0  | 0  | 0  | 0  | 0  | 0  | 0  | 0   | 0  |
| Plt_hauc | 10 | 1  | 4  | 1  | 16 | 13 | 0  | 4  | 0  | 0  | 0   | 1  |
| Plt_lanc | 0  | 0  | 0  | 0  | 0  | 0  | 0  | 0  | 0  | 0  | 0   | 0  |
| Plt_lemm | 0  | 1  | 0  | 9  | 13 | 2  | 0  | 2  | 0  | 1  | 0   | 5  |
| Plt_link | 4  | 0  | 0  | 4  | 0  | 0  | 0  | 1  | 0  | 3  | 2   | 2  |
| Plt_peri | 0  | 0  | 0  | 0  | 0  | 0  | 0  | 0  | 0  | 0  | 0   | 0  |
| Plt_rost | 0  | 0  | 0  | 0  | 0  | 0  | 0  | 0  | 0  | 0  | 0   | 0  |
| Plt_sept | 0  | 0  | 0  | 0  | 0  | 0  | 0  | 0  | 0  | 0  | 0   | 0  |
| Psf_tene | 0  | 0  | 0  | 0  | 0  | 2  | 0  | 1  | 0  | 0  | 0   | 0  |
| Pss_brev | 0  | 0  | 0  | 0  | 0  | 0  | 0  | 2  | 0  | 4  | 0   | 10 |
| Pss_brin | 0  | 0  | 0  | 0  | 0  | 0  | 0  | 0  | 0  | 0  | 0   | 0  |
| Pss_elli | 0  | 0  | 0  | 0  | 0  | 0  | 0  | 0  | 0  | 0  | 0   | 10 |
| Pss_perm | 0  | 0  | 0  | 0  | 0  | 0  | 0  | 0  | 0  | 0  | 0   | 0  |
| Pss_robu | 0  | 0  | 0  | 0  | 0  | 0  | 0  | 0  | 0  | 0  | 0   | 0  |
| Pss_subs | 0  | 0  | 0  | 0  | 0  | 9  | 0  | 0  | 0  | 0  | 0   | 0  |
| Pss_zeil | 0  | 0  | 0  | 0  | 0  | 5  | 0  | 2  | 0  | 0  | 0   | 3  |
| Pst_bior | 0  | 0  | 0  | 0  | 0  | 0  | 0  | 0  | 0  | 0  | 0   | 0  |
| Pst_oblo | 0  | 0  | 0  | 0  | 0  | 0  | 0  | 0  | 0  | 0  | 0   | 0  |
| Pst_punc | 14 | 8  | 8  | 39 | 10 | 5  | 9  | 3  | 1  | 1  | 2   | 3  |
| Pst_ross | 0  | 0  | 0  | 0  | 0  | 0  | 0  | 0  | 0  | 0  | 0   | 0  |
| Pst_sacc | 0  | 0  | 0  | 0  | 0  | 0  | 0  | 0  | 0  | 0  | 0   | 0  |
| Pte_inan | 0  | 0  | 0  | 0  | 0  | 0  | 0  | 0  | 0  | 0  | 0   | 0  |
| Rei_sinu | 0  | 0  | 0  | 0  | 0  | 0  | 0  | 0  | 0  | 0  | 0   | 0  |
| Rho_abbr | 55 | 83 | 42 | 67 | 65 | 72 | 54 | 24 | 27 | 96 | 102 | 22 |
| Rhp_acum | 0  | 0  | 0  | 0  | 0  | 0  | 0  | 0  | 0  | 0  | 0   | 0  |
| Rhp_breb | 0  | 0  | 0  | 0  | 0  | 0  | 0  | 0  | 0  | 0  | 0   | 0  |
| Rhp_gibb | 0  | 0  | 0  | 0  | 0  | 0  | 0  | 0  | 0  | 0  | 0   | 0  |
| Sel_pupu | 0  | 0  | 0  | 0  | 0  | 0  | 0  | 0  | 0  | 0  | 0   | 0  |
| Sel_stro | 0  | 0  | 0  | 0  | 0  | 0  | 0  | 0  | 0  | 0  | 0   | 0  |
| Ske_cost | 0  | 0  | 0  | 0  | 0  | 0  | 0  | 0  | 0  | 0  | 0   | 0  |
| Ske_subs | 0  | 0  | 0  | 0  | 0  | 0  | 0  | 0  | 0  | 0  | 1   | 0  |
| Sla_lapp | 0  | 0  | 0  | 0  | 0  | 0  | 0  | 0  | 0  | 0  | 0   | 0  |
| Std_hant | 0  | 0  | 0  | 0  | 0  | 0  | 0  | 0  | 0  | 0  | 0   | 0  |
| Std_parv | 4  | 1  | 0  | 0  | 0  | 0  | 0  | 0  | 0  | 0  | 0   | 0  |
| Stn_legu | 0  | 0  | 0  | 0  | 0  | 0  | 0  | 0  | 0  | 0  | 0   | 0  |
| Stn_phoe | 0  | 0  | 0  | 0  | 0  | 0  | 0  | 0  | 0  | 0  | 0   | 0  |
| Stn_simu | 4  | 0  | 13 | 0  | 0  | 0  | 4  | 0  | 2  | 0  | 6   | 0  |
| Stn_smka | 0  | 0  | 0  | 0  | 0  | 0  | 0  | 0  | 0  | 0  | 0   | 0  |
| Stp_anus | 6  | 0  | 0  | 0  | 0  | 0  | 0  | 0  | 4  | 0  | 0   | 0  |
| Stp_wisl | 0  | 0  | 0  | 0  | 0  | 0  | 0  | 0  | 0  | 0  | 0   | 0  |
| Sts_punc | 0  | 0  | 0  | 0  | 0  | 3  | 4  | 8  | 8  | 2  | 0   | 54 |









|          |   |    |    |    |   |   |    |   |    |    |
|----------|---|----|----|----|---|---|----|---|----|----|
| Fra_amic | 0 | 0  | 0  | 0  | 0 | 0 | 0  | 0 | 0  | 0  |
| Fra_capu | 0 | 0  | 0  | 0  | 0 | 0 | 0  | 0 | 0  | 0  |
| Fra_caru | 6 | 4  | 4  | 9  | 0 | 9 | 3  | 0 | 0  | 0  |
| Fra_cava | 0 | 0  | 0  | 0  | 0 | 0 | 0  | 0 | 0  | 0  |
| Fra_cons | 0 | 0  | 0  | 0  | 0 | 0 | 0  | 0 | 0  | 0  |
| Fra_geda | 6 | 9  | 0  | 0  | 3 | 0 | 2  | 0 | 1  | 1  |
| Fra_grac | 0 | 0  | 0  | 0  | 0 | 0 | 0  | 0 | 0  | 0  |
| Fra_hydu | 0 | 0  | 0  | 0  | 0 | 0 | 0  | 0 | 0  | 0  |
| Fra_lept | 0 | 0  | 0  | 0  | 0 | 0 | 0  | 0 | 0  | 0  |
| Fra_nitz | 0 | 0  | 0  | 0  | 0 | 0 | 0  | 0 | 0  | 0  |
| Frp_cyli | 0 | 0  | 0  | 0  | 0 | 0 | 0  | 0 | 0  | 0  |
| Fru_vulg | 0 | 0  | 0  | 0  | 0 | 0 | 0  | 0 | 0  | 0  |
| Gom_clav | 0 | 0  | 0  | 0  | 0 | 0 | 0  | 0 | 0  | 0  |
| Gom_intr | 0 | 0  | 0  | 0  | 0 | 0 | 0  | 0 | 1  | 0  |
| Gom_oliv | 0 | 23 | 24 | 76 | 4 | 2 | 2  | 8 | 22 | 11 |
| Gom_parv | 0 | 0  | 0  | 0  | 0 | 0 | 0  | 0 | 0  | 0  |
| Gon_exig | 0 | 0  | 0  | 0  | 0 | 0 | 0  | 0 | 0  | 1  |
| Gos_expl | 0 | 0  | 0  | 0  | 0 | 0 | 0  | 0 | 0  | 0  |
| Gos_obsc | 0 | 0  | 0  | 0  | 0 | 0 | 0  | 0 | 0  | 1  |
| Gra_mari | 0 | 0  | 0  | 0  | 0 | 0 | 0  | 0 | 0  | 0  |
| Gra_ocea | 0 | 0  | 0  | 0  | 0 | 0 | 0  | 0 | 0  | 0  |
| Gyr_acum | 2 | 0  | 0  | 0  | 0 | 0 | 0  | 0 | 0  | 0  |
| Gyr_atte | 0 | 0  | 0  | 0  | 0 | 1 | 0  | 0 | 0  | 0  |
| Gyr_stri | 0 | 0  | 0  | 0  | 0 | 0 | 0  | 0 | 0  | 0  |
| Gyr_tenu | 0 | 0  | 0  | 0  | 0 | 0 | 0  | 0 | 0  | 0  |
| Hal_coff | 2 | 3  | 3  | 1  | 0 | 2 | 1  | 1 | 4  | 0  |
| Hal_exig | 0 | 0  | 0  | 0  | 0 | 0 | 0  | 0 | 0  | 0  |
| Hal_hols | 0 | 0  | 0  | 0  | 0 | 0 | 0  | 1 | 0  | 0  |
| Hal_hybr | 0 | 0  | 0  | 0  | 0 | 0 | 0  | 0 | 0  | 0  |
| Hal_luci | 0 | 0  | 0  | 0  | 0 | 0 | 3  | 0 | 0  | 0  |
| Hal_norm | 0 | 0  | 0  | 0  | 0 | 0 | 0  | 0 | 0  | 0  |
| Hal_subh | 0 | 0  | 0  | 0  | 0 | 0 | 0  | 0 | 0  | 0  |
| Hal_tene | 8 | 1  | 1  | 2  | 4 | 0 | 15 | 5 | 5  | 1  |
| Hal_vene | 0 | 0  | 0  | 0  | 0 | 0 | 0  | 0 | 0  | 0  |
| Han_balt | 0 | 0  | 0  | 0  | 0 | 0 | 0  | 0 | 0  | 0  |
| Has_spic | 0 | 2  | 0  | 0  | 0 | 2 | 0  | 0 | 0  | 0  |
| Hip_capi | 0 | 0  | 0  | 0  | 0 | 0 | 0  | 0 | 0  | 0  |
| Hip_hung | 0 | 0  | 0  | 0  | 0 | 0 | 0  | 0 | 0  | 0  |
| Hip_lesm | 0 | 0  | 0  | 0  | 0 | 0 | 0  | 0 | 0  | 0  |
| Kar_amoe | 1 | 3  | 0  | 0  | 0 | 1 | 3  | 0 | 1  | 0  |
| Kar_clev | 1 | 1  | 0  | 0  | 1 | 0 | 0  | 0 | 0  | 0  |



|           |    |    |    |    |   |    |    |    |    |    |
|-----------|----|----|----|----|---|----|----|----|----|----|
| Kar_niti  | 0  | 0  | 0  | 0  | 0 | 0  | 0  | 0  | 0  | 0  |
| Kar_subm  | 0  | 0  | 0  | 0  | 0 | 0  | 5  | 0  | 0  | 0  |
| Lemn_hung | 0  | 0  | 0  | 0  | 0 | 0  | 0  | 0  | 0  | 0  |
| Lic_debi  | 0  | 0  | 0  | 0  | 0 | 0  | 0  | 0  | 0  | 0  |
| Lic_gran  | 2  | 0  | 1  | 2  | 2 | 1  | 0  | 0  | 1  | 1  |
| Lic_oedi  | 0  | 0  | 0  | 0  | 0 | 0  | 0  | 0  | 0  | 0  |
| Lic_rhom  | 0  | 0  | 0  | 0  | 0 | 0  | 0  | 0  | 0  | 0  |
| Lun_bise  | 17 | 6  | 12 | 11 | 8 | 2  | 7  | 12 | 28 | 11 |
| Lut_muti  | 0  | 0  | 0  | 0  | 0 | 0  | 0  | 0  | 0  | 0  |
| Mar_atom  | 95 | 25 | 10 | 20 | 9 | 46 | 30 | 5  | 7  | 15 |
| Mar_mart  | 0  | 0  | 2  | 0  | 0 | 0  | 0  | 0  | 0  | 0  |
| Mar_schu  | 0  | 0  | 0  | 0  | 0 | 0  | 2  | 0  | 0  | 0  |
| Mas_balt  | 0  | 1  | 0  | 0  | 0 | 1  | 0  | 0  | 0  | 0  |
| Mas_brau  | 0  | 0  | 0  | 0  | 0 | 0  | 0  | 1  | 0  | 0  |
| Mas_elli  | 0  | 0  | 0  | 0  | 1 | 0  | 1  | 0  | 0  | 0  |
| Mas_exig  | 0  | 0  | 0  | 0  | 0 | 0  | 0  | 0  | 0  | 0  |
| Mas_pumi  | 2  | 2  | 0  | 1  | 1 | 2  | 1  | 2  | 0  | 0  |
| Mas_pusi  | 0  | 0  | 0  | 0  | 0 | 0  | 0  | 0  | 0  | 0  |
| Mas_smam  | 0  | 0  | 0  | 0  | 0 | 0  | 0  | 0  | 0  | 0  |
| Mas_smit  | 1  | 11 | 20 | 5  | 2 | 23 | 3  | 21 | 1  | 8  |
| Mel_arct  | 0  | 0  | 0  | 0  | 0 | 0  | 0  | 0  | 0  | 0  |
| Mel_line  | 1  | 1  | 0  | 0  | 0 | 1  | 0  | 0  | 1  | 0  |
| Mel_moni  | 0  | 0  | 0  | 0  | 0 | 0  | 0  | 0  | 0  | 0  |
| Mel_numm  | 0  | 0  | 0  | 0  | 0 | 0  | 0  | 0  | 0  | 0  |
| Mel_vari  | 0  | 0  | 0  | 0  | 0 | 0  | 0  | 0  | 0  | 0  |
| Nav_aren  | 0  | 0  | 0  | 0  | 0 | 0  | 0  | 0  | 0  | 0  |
| Nav_bipu  | 0  | 0  | 0  | 0  | 0 | 0  | 0  | 0  | 0  | 0  |
| Nav_boss  | 0  | 0  | 0  | 0  | 0 | 0  | 0  | 2  | 4  | 0  |
| Nav_bott  | 0  | 0  | 0  | 0  | 0 | 0  | 0  | 2  | 0  | 1  |
| Nav_brem  | 0  | 0  | 0  | 0  | 0 | 0  | 0  | 0  | 0  | 0  |
| Nav_capi  | 0  | 0  | 0  | 0  | 0 | 0  | 0  | 0  | 0  | 0  |
| Nav_cinc  | 0  | 0  | 0  | 0  | 0 | 0  | 0  | 0  | 0  | 0  |
| Nav_clem  | 0  | 0  | 0  | 0  | 0 | 0  | 0  | 0  | 0  | 0  |
| Nav_cryp  | 0  | 0  | 0  | 0  | 1 | 1  | 1  | 3  | 4  | 2  |
| Nav_digi  | 0  | 0  | 0  | 0  | 0 | 0  | 0  | 0  | 0  | 0  |
| Nav_duer  | 0  | 0  | 0  | 0  | 0 | 0  | 0  | 0  | 0  | 0  |
| Nav_eidr  | 0  | 0  | 0  | 0  | 0 | 0  | 0  | 0  | 0  | 0  |
| Nav_flan  | 0  | 0  | 0  | 0  | 0 | 0  | 0  | 0  | 0  | 0  |
| Nav_geii  | 3  | 2  | 0  | 0  | 0 | 0  | 14 | 0  | 0  | 0  |
| Nav_gepo  | 0  | 0  | 0  | 0  | 0 | 0  | 0  | 0  | 0  | 0  |
| Nav_greg  | 19 | 14 | 7  | 5  | 8 | 7  | 6  | 19 | 22 | 16 |





|          |     |     |    |     |     |    |     |    |    |     |
|----------|-----|-----|----|-----|-----|----|-----|----|----|-----|
| Plt_freq | 0   | 0   | 0  | 0   | 0   | 0  | 0   | 0  | 0  | 0   |
| Plt_hauc | 27  | 4   | 3  | 1   | 4   | 7  | 18  | 9  | 3  | 3   |
| Plt_lanc | 0   | 0   | 0  | 0   | 0   | 0  | 0   | 0  | 0  | 0   |
| Plt_lemm | 0   | 0   | 0  | 0   | 0   | 0  | 2   | 0  | 0  | 0   |
| Plt_link | 0   | 0   | 0  | 0   | 0   | 0  | 0   | 0  | 0  | 0   |
| Plt_peri | 0   | 0   | 0  | 0   | 0   | 0  | 0   | 1  | 0  | 0   |
| Plt_rost | 0   | 0   | 0  | 0   | 0   | 0  | 0   | 0  | 0  | 0   |
| Plt_sept | 0   | 0   | 0  | 0   | 0   | 0  | 0   | 0  | 0  | 0   |
| Psf_tene | 0   | 0   | 0  | 0   | 0   | 0  | 0   | 0  | 0  | 0   |
| Pss_brev | 59  | 0   | 0  | 0   | 3   | 0  | 0   | 0  | 0  | 0   |
| Pss_brin | 14  | 4   | 0  | 0   | 0   | 0  | 1   | 0  | 0  | 0   |
| Pss_elli | 15  | 17  | 0  | 8   | 6   | 7  | 17  | 1  | 5  | 0   |
| Pss_perm | 49  | 39  | 4  | 7   | 8   | 23 | 28  | 19 | 5  | 2   |
| Pss_robu | 0   | 0   | 0  | 0   | 0   | 0  | 0   | 0  | 0  | 0   |
| Pss_subs | 0   | 0   | 0  | 0   | 0   | 0  | 0   | 0  | 0  | 0   |
| Pss_zeil | 75  | 53  | 18 | 23  | 17  | 10 | 12  | 9  | 2  | 1   |
| Pst_bior | 0   | 0   | 0  | 0   | 0   | 0  | 0   | 0  | 0  | 0   |
| Pst_oblo | 0   | 0   | 0  | 0   | 0   | 0  | 0   | 0  | 0  | 0   |
| Pst_punc | 0   | 0   | 2  | 0   | 0   | 0  | 0   | 0  | 2  | 0   |
| Pst_ross | 1   | 0   | 0  | 0   | 0   | 0  | 0   | 0  | 0  | 0   |
| Pst_sacc | 0   | 0   | 0  | 0   | 0   | 0  | 0   | 0  | 0  | 0   |
| Pte_inan | 0   | 0   | 0  | 0   | 0   | 0  | 0   | 0  | 0  | 0   |
| Rei_sinu | 0   | 0   | 0  | 0   | 0   | 0  | 0   | 0  | 0  | 0   |
| Rho_abbr | 10  | 50  | 85 | 169 | 195 | 89 | 223 | 54 | 13 | 190 |
| Rhp_acum | 0   | 0   | 0  | 0   | 0   | 0  | 0   | 0  | 0  | 0   |
| Rhp_breb | 0   | 0   | 0  | 0   | 0   | 0  | 0   | 0  | 0  | 0   |
| Rhp_gibb | 0   | 0   | 0  | 0   | 1   | 4  | 0   | 0  | 0  | 0   |
| Sel_pupu | 0   | 0   | 0  | 0   | 0   | 0  | 0   | 0  | 0  | 0   |
| Sel_stro | 0   | 0   | 0  | 0   | 0   | 0  | 0   | 0  | 0  | 0   |
| Ske_cost | 0   | 0   | 0  | 0   | 0   | 0  | 0   | 0  | 0  | 0   |
| Ske_subs | 0   | 0   | 0  | 0   | 0   | 0  | 0   | 0  | 0  | 0   |
| Sla_lapp | 0   | 0   | 0  | 0   | 0   | 0  | 0   | 0  | 0  | 0   |
| Std_hant | 0   | 0   | 0  | 0   | 0   | 0  | 0   | 0  | 0  | 0   |
| Std_parv | 0   | 0   | 0  | 0   | 0   | 0  | 0   | 0  | 0  | 0   |
| Stn_legu | 0   | 0   | 0  | 0   | 0   | 0  | 0   | 0  | 0  | 0   |
| Stn_phoe | 0   | 0   | 0  | 0   | 0   | 0  | 0   | 0  | 0  | 0   |
| Stn_simu | 0   | 0   | 0  | 0   | 0   | 0  | 0   | 0  | 0  | 0   |
| Stn_smka | 0   | 0   | 0  | 0   | 0   | 0  | 0   | 0  | 0  | 0   |
| Stp_anus | 0   | 0   | 0  | 0   | 0   | 0  | 0   | 0  | 0  | 0   |
| Stp_wisl | 0   | 0   | 0  | 0   | 0   | 0  | 0   | 0  | 0  | 0   |
| Sts_punc | 243 | 127 | 35 | 40  | 63  | 66 | 97  | 8  | 7  | 8   |











|          |    |    |   |    |    |    |   |    |    |   |
|----------|----|----|---|----|----|----|---|----|----|---|
| Fra_amic | 0  | 0  | 0 | 0  | 0  | 0  | 0 | 0  | 0  | 0 |
| Fra_capu | 0  | 0  | 0 | 0  | 0  | 0  | 0 | 0  | 0  | 0 |
| Fra_caru | 0  | 0  | 0 | 7  | 15 | 20 | 5 | 1  | 0  | 0 |
| Fra_cava | 0  | 0  | 0 | 0  | 0  | 0  | 0 | 0  | 0  | 0 |
| Fra_cons | 0  | 0  | 0 | 0  | 0  | 0  | 0 | 0  | 0  | 0 |
| Fra_geda | 0  | 0  | 0 | 0  | 2  | 7  | 0 | 0  | 0  | 1 |
| Fra_grac | 0  | 0  | 0 | 0  | 0  | 0  | 0 | 0  | 0  | 0 |
| Fra_hydu | 0  | 0  | 0 | 0  | 0  | 0  | 0 | 0  | 0  | 0 |
| Fra_lept | 0  | 0  | 0 | 0  | 0  | 0  | 0 | 0  | 0  | 0 |
| Fra_nitz | 0  | 0  | 0 | 0  | 0  | 0  | 0 | 0  | 0  | 0 |
| Frp_cyli | 0  | 0  | 0 | 0  | 0  | 0  | 0 | 0  | 0  | 0 |
| Fru_vulg | 0  | 0  | 0 | 0  | 0  | 0  | 0 | 0  | 0  | 0 |
| Gom_clav | 0  | 0  | 0 | 0  | 0  | 0  | 0 | 0  | 0  | 0 |
| Gom_intr | 0  | 0  | 0 | 0  | 0  | 0  | 0 | 0  | 0  | 0 |
| Gom_oliv | 51 | 12 | 6 | 12 | 3  | 0  | 1 | 63 | 41 | 7 |
| Gom_parv | 0  | 0  | 0 | 0  | 0  | 0  | 0 | 0  | 0  | 0 |
| Gon_exig | 0  | 0  | 0 | 0  | 0  | 0  | 0 | 0  | 0  | 1 |
| Gos_expl | 0  | 0  | 0 | 0  | 0  | 0  | 0 | 0  | 0  | 0 |
| Gos_obsc | 0  | 0  | 0 | 0  | 0  | 0  | 0 | 0  | 0  | 1 |
| Gra_mari | 0  | 0  | 0 | 0  | 0  | 0  | 0 | 0  | 0  | 0 |
| Gra_ocea | 0  | 0  | 0 | 0  | 0  | 0  | 0 | 0  | 0  | 0 |
| Gyr_acum | 0  | 0  | 0 | 0  | 0  | 0  | 0 | 0  | 0  | 0 |
| Gyr_atte | 0  | 0  | 0 | 0  | 0  | 0  | 1 | 0  | 0  | 0 |
| Gyr_stri | 0  | 0  | 0 | 0  | 0  | 0  | 0 | 0  | 0  | 0 |
| Gyr_tenu | 0  | 0  | 0 | 0  | 0  | 0  | 0 | 0  | 0  | 0 |
| Hal_coff | 0  | 0  | 0 | 0  | 2  | 7  | 6 | 0  | 0  | 0 |
| Hal_exig | 0  | 0  | 0 | 0  | 0  | 0  | 0 | 0  | 0  | 0 |
| Hal_hols | 0  | 0  | 0 | 0  | 0  | 0  | 0 | 0  | 0  | 0 |
| Hal_hybr | 0  | 0  | 0 | 0  | 0  | 0  | 0 | 0  | 0  | 0 |
| Hal_luci | 0  | 0  | 0 | 0  | 0  | 0  | 0 | 0  | 0  | 0 |
| Hal_norm | 0  | 0  | 0 | 0  | 0  | 0  | 0 | 0  | 0  | 0 |
| Hal_subh | 0  | 0  | 0 | 0  | 0  | 0  | 0 | 0  | 0  | 0 |
| Hal_tene | 2  | 2  | 0 | 2  | 8  | 0  | 6 | 0  | 0  | 2 |
| Hal_vene | 0  | 0  | 0 | 0  | 0  | 0  | 0 | 0  | 0  | 0 |
| Han_balt | 0  | 0  | 0 | 0  | 0  | 0  | 0 | 0  | 0  | 0 |
| Has_spic | 0  | 0  | 0 | 0  | 1  | 1  | 0 | 0  | 0  | 0 |
| Hip_capi | 0  | 0  | 0 | 0  | 0  | 0  | 0 | 0  | 0  | 0 |
| Hip_hung | 0  | 0  | 0 | 0  | 0  | 0  | 0 | 0  | 0  | 0 |
| Hip_lesm | 0  | 0  | 0 | 0  | 0  | 0  | 0 | 0  | 0  | 0 |
| Kar_amoe | 0  | 0  | 0 | 0  | 1  | 0  | 0 | 0  | 0  | 1 |
| Kar_clev | 0  | 0  | 0 | 0  | 0  | 1  | 0 | 0  | 0  | 0 |

|           |    |    |    |    |    |    |    |   |   |    |
|-----------|----|----|----|----|----|----|----|---|---|----|
| Kar_niti  | 0  | 0  | 0  | 0  | 0  | 0  | 0  | 0 | 0 | 0  |
| Kar_subm  | 0  | 1  | 0  | 2  | 0  | 0  | 0  | 0 | 0 | 0  |
| Lemn_hung | 0  | 0  | 0  | 0  | 0  | 0  | 0  | 0 | 0 | 0  |
| Lic_debi  | 0  | 0  | 0  | 0  | 0  | 0  | 0  | 0 | 0 | 0  |
| Lic_gran  | 10 | 0  | 11 | 0  | 0  | 0  | 0  | 0 | 0 | 1  |
| Lic_oedi  | 0  | 0  | 0  | 0  | 0  | 0  | 0  | 0 | 0 | 0  |
| Lic_rhom  | 0  | 0  | 0  | 0  | 0  | 0  | 0  | 0 | 0 | 0  |
| Lun_bise  | 6  | 14 | 0  | 21 | 24 | 13 | 41 | 9 | 8 | 23 |
| Lut_muti  | 0  | 0  | 0  | 0  | 0  | 0  | 0  | 0 | 0 | 0  |
| Mar_atom  | 0  | 13 | 0  | 33 | 60 | 70 | 34 | 0 | 0 | 15 |
| Mar_mart  | 0  | 0  | 0  | 19 | 0  | 3  | 0  | 0 | 0 | 0  |
| Mar_schu  | 0  | 0  | 0  | 0  | 0  | 1  | 1  | 0 | 0 | 0  |
| Mas_balt  | 0  | 0  | 0  | 0  | 0  | 1  | 0  | 0 | 0 | 1  |
| Mas_brau  | 0  | 0  | 0  | 0  | 0  | 0  | 0  | 0 | 0 | 0  |
| Mas_elli  | 0  | 1  | 0  | 0  | 0  | 0  | 0  | 0 | 0 | 0  |
| Mas_exig  | 0  | 0  | 0  | 0  | 0  | 0  | 0  | 0 | 0 | 0  |
| Mas_pumi  | 0  | 0  | 0  | 1  | 0  | 4  | 0  | 0 | 0 | 1  |
| Mas_pusi  | 0  | 0  | 0  | 0  | 0  | 0  | 0  | 0 | 0 | 0  |
| Mas_smam  | 0  | 0  | 0  | 0  | 0  | 0  | 0  | 0 | 0 | 0  |
| Mas_smit  | 0  | 3  | 6  | 1  | 3  | 8  | 2  | 0 | 0 | 4  |
| Mel_arct  | 0  | 0  | 0  | 0  | 0  | 0  | 0  | 0 | 0 | 0  |
| Mel_line  | 0  | 1  | 0  | 0  | 4  | 0  | 3  | 0 | 0 | 0  |
| Mel_moni  | 0  | 0  | 0  | 0  | 0  | 0  | 0  | 0 | 0 | 0  |
| Mel_numm  | 0  | 0  | 0  | 0  | 0  | 1  | 2  | 0 | 0 | 0  |
| Mel_vari  | 0  | 0  | 0  | 0  | 0  | 0  | 0  | 0 | 0 | 0  |
| Nav_aren  | 0  | 0  | 0  | 0  | 0  | 0  | 0  | 0 | 0 | 0  |
| Nav_bipu  | 0  | 0  | 0  | 0  | 0  | 0  | 0  | 0 | 0 | 0  |
| Nav_boss  | 0  | 0  | 0  | 0  | 0  | 0  | 0  | 0 | 0 | 0  |
| Nav_bott  | 0  | 0  | 1  | 0  | 0  | 0  | 0  | 2 | 0 | 0  |
| Nav_brem  | 0  | 0  | 0  | 0  | 0  | 0  | 0  | 0 | 0 | 0  |
| Nav_capi  | 0  | 0  | 0  | 0  | 0  | 0  | 0  | 0 | 0 | 0  |
| Nav_cinc  | 0  | 0  | 0  | 0  | 0  | 0  | 1  | 0 | 0 | 0  |
| Nav_clem  | 0  | 0  | 0  | 0  | 0  | 0  | 0  | 0 | 0 | 0  |
| Nav_cryp  | 0  | 0  | 0  | 0  | 0  | 0  | 0  | 0 | 0 | 0  |
| Nav_digi  | 0  | 0  | 0  | 0  | 0  | 0  | 0  | 0 | 0 | 0  |
| Nav_duer  | 0  | 0  | 0  | 0  | 0  | 0  | 0  | 0 | 0 | 0  |
| Nav_eidr  | 0  | 0  | 0  | 0  | 0  | 0  | 0  | 0 | 0 | 0  |
| Nav_flan  | 0  | 0  | 0  | 0  | 0  | 0  | 0  | 0 | 0 | 0  |
| Nav_geii  | 0  | 0  | 0  | 0  | 0  | 0  | 0  | 0 | 0 | 0  |
| Nav_gepo  | 0  | 0  | 0  | 0  | 0  | 0  | 0  | 0 | 0 | 0  |
| Nav_greg  | 3  | 12 | 0  | 11 | 7  | 16 | 94 | 3 | 1 | 21 |





|          |    |    |    |    |     |     |    |    |    |     |
|----------|----|----|----|----|-----|-----|----|----|----|-----|
| Plt_freq | 0  | 0  | 0  | 0  | 0   | 0   | 0  | 0  | 0  | 0   |
| Plt_hauc | 0  | 0  | 0  | 0  | 5   | 10  | 10 | 0  | 0  | 3   |
| Plt_lanc | 0  | 0  | 0  | 0  | 0   | 1   | 0  | 0  | 0  | 0   |
| Plt_lemm | 0  | 0  | 0  | 0  | 0   | 0   | 0  | 0  | 0  | 0   |
| Plt_link | 0  | 0  | 0  | 0  | 0   | 0   | 0  | 0  | 0  | 0   |
| Plt_peri | 0  | 0  | 0  | 0  | 0   | 0   | 0  | 0  | 0  | 0   |
| Plt_rost | 0  | 0  | 0  | 0  | 0   | 0   | 0  | 0  | 0  | 0   |
| Plt_sept | 0  | 0  | 0  | 0  | 0   | 0   | 0  | 0  | 0  | 0   |
| Psf_tene | 0  | 0  | 0  | 0  | 0   | 0   | 0  | 0  | 0  | 0   |
| Pss_brev | 1  | 7  | 0  | 1  | 9   | 49  | 0  | 0  | 0  | 1   |
| Pss_brin | 0  | 0  | 0  | 7  | 18  | 42  | 1  | 0  | 0  | 0   |
| Pss_elli | 0  | 0  | 0  | 10 | 18  | 24  | 6  | 0  | 0  | 2   |
| Pss_perm | 0  | 2  | 0  | 17 | 31  | 67  | 20 | 0  | 0  | 6   |
| Pss_robu | 0  | 0  | 0  | 0  | 0   | 0   | 0  | 0  | 0  | 0   |
| Pss_subs | 0  | 0  | 0  | 0  | 0   | 0   | 0  | 0  | 0  | 0   |
| Pss_zeil | 0  | 7  | 0  | 33 | 91  | 209 | 21 | 0  | 0  | 7   |
| Pst_bior | 0  | 0  | 0  | 0  | 0   | 0   | 0  | 0  | 0  | 0   |
| Pst_oblo | 0  | 0  | 0  | 0  | 0   | 0   | 0  | 0  | 0  | 0   |
| Pst_punc | 0  | 0  | 0  | 0  | 2   | 0   | 1  | 1  | 0  | 0   |
| Pst_ross | 0  | 0  | 0  | 0  | 0   | 0   | 0  | 0  | 0  | 0   |
| Pst_sacc | 0  | 0  | 0  | 0  | 0   | 0   | 0  | 0  | 0  | 0   |
| Pte_inan | 0  | 0  | 0  | 0  | 0   | 0   | 0  | 0  | 0  | 0   |
| Rei_sinu | 0  | 0  | 0  | 0  | 0   | 0   | 0  | 0  | 0  | 0   |
| Rho_abbr | 78 | 59 | 63 | 31 | 4   | 13  | 21 | 11 | 13 | 109 |
| Rhp_acum | 0  | 0  | 0  | 0  | 0   | 0   | 0  | 0  | 0  | 0   |
| Rhp_breb | 0  | 0  | 0  | 0  | 0   | 0   | 0  | 0  | 0  | 0   |
| Rhp_gibb | 0  | 0  | 1  | 0  | 0   | 0   | 0  | 0  | 0  | 0   |
| Sel_pupu | 0  | 0  | 0  | 0  | 0   | 0   | 0  | 0  | 0  | 0   |
| Sel_stro | 0  | 0  | 0  | 0  | 0   | 0   | 0  | 0  | 0  | 0   |
| Ske_cost | 0  | 0  | 0  | 0  | 0   | 0   | 0  | 0  | 0  | 0   |
| Ske_subs | 0  | 0  | 0  | 0  | 0   | 0   | 0  | 0  | 0  | 0   |
| Sla_lapp | 0  | 0  | 0  | 0  | 0   | 0   | 0  | 0  | 0  | 0   |
| Std_hant | 0  | 0  | 0  | 0  | 0   | 0   | 0  | 0  | 0  | 0   |
| Std_parv | 0  | 0  | 0  | 0  | 0   | 0   | 0  | 0  | 0  | 0   |
| Stn_legu | 0  | 0  | 0  | 0  | 0   | 0   | 2  | 0  | 0  | 0   |
| Stn_phoe | 0  | 0  | 0  | 0  | 0   | 0   | 0  | 0  | 0  | 0   |
| Stn_simu | 0  | 0  | 0  | 0  | 0   | 0   | 0  | 0  | 0  | 0   |
| Stn_smka | 0  | 0  | 0  | 0  | 0   | 0   | 0  | 0  | 0  | 0   |
| Stp_anus | 0  | 0  | 0  | 0  | 0   | 0   | 0  | 0  | 0  | 0   |
| Stp_wisl | 0  | 0  | 0  | 0  | 0   | 0   | 0  | 0  | 0  | 0   |
| Sts_punc | 2  | 13 | 7  | 40 | 100 | 100 | 73 | 0  | 0  | 11  |













|           |    |    |    |     |    |    |    |    |    |     |
|-----------|----|----|----|-----|----|----|----|----|----|-----|
| Kar_niti  | 0  | 0  | 0  | 0   | 0  | 0  | 0  | 0  | 0  | 0   |
| Kar_subm  | 0  | 4  | 0  | 0   | 1  | 0  | 1  | 0  | 0  | 0   |
| Lemn_hung | 0  | 0  | 0  | 0   | 0  | 0  | 0  | 0  | 0  | 0   |
| Lic_debi  | 0  | 0  | 0  | 0   | 0  | 0  | 0  | 0  | 0  | 0   |
| Lic_gran  | 0  | 1  | 4  | 0   | 1  | 10 | 16 | 24 | 13 | 2   |
| Lic_oedi  | 0  | 0  | 0  | 0   | 0  | 0  | 0  | 0  | 0  | 0   |
| Lic_rhom  | 0  | 0  | 0  | 0   | 0  | 0  | 0  | 0  | 0  | 0   |
| Lun_bise  | 6  | 32 | 6  | 1   | 0  | 0  | 1  | 1  | 3  | 9   |
| Lut_muti  | 0  | 0  | 0  | 0   | 0  | 0  | 0  | 0  | 0  | 0   |
| Mar_atom  | 10 | 1  | 0  | 104 | 59 | 0  | 3  | 1  | 1  | 100 |
| Mar_mart  | 0  | 0  | 0  | 0   | 0  | 0  | 0  | 0  | 0  | 6   |
| Mar_schu  | 1  | 0  | 0  | 6   | 3  | 0  | 0  | 0  | 0  | 13  |
| Mas_balt  | 0  | 0  | 0  | 0   | 0  | 0  | 0  | 0  | 0  | 0   |
| Mas_brau  | 0  | 0  | 0  | 0   | 0  | 0  | 0  | 0  | 0  | 0   |
| Mas_elli  | 0  | 2  | 0  | 2   | 0  | 0  | 0  | 0  | 0  | 0   |
| Mas_exig  | 0  | 0  | 0  | 0   | 0  | 0  | 0  | 0  | 0  | 0   |
| Mas_pumi  | 0  | 0  | 0  | 0   | 0  | 0  | 0  | 0  | 0  | 0   |
| Mas_pusi  | 0  | 0  | 0  | 0   | 0  | 0  | 0  | 0  | 0  | 0   |
| Mas_smam  | 0  | 0  | 0  | 0   | 0  | 0  | 0  | 0  | 0  | 0   |
| Mas_smit  | 7  | 6  | 1  | 12  | 9  | 0  | 2  | 0  | 3  | 4   |
| Mel_arct  | 0  | 0  | 0  | 0   | 0  | 0  | 0  | 0  | 0  | 0   |
| Mel_line  | 0  | 0  | 0  | 0   | 0  | 0  | 0  | 0  | 0  | 1   |
| Mel_moni  | 0  | 4  | 0  | 0   | 1  | 0  | 0  | 1  | 0  | 0   |
| Mel_numm  | 0  | 0  | 0  | 0   | 0  | 0  | 0  | 0  | 0  | 0   |
| Mel_vari  | 0  | 0  | 0  | 0   | 0  | 0  | 0  | 0  | 0  | 0   |
| Nav_aren  | 0  | 0  | 0  | 0   | 0  | 0  | 0  | 0  | 0  | 0   |
| Nav_bipu  | 0  | 0  | 0  | 0   | 0  | 0  | 0  | 0  | 0  | 0   |
| Nav_boss  | 0  | 0  | 0  | 0   | 0  | 0  | 2  | 0  | 0  | 3   |
| Nav_bott  | 0  | 3  | 1  | 1   | 0  | 4  | 3  | 3  | 0  | 0   |
| Nav_brem  | 0  | 0  | 0  | 0   | 0  | 0  | 0  | 0  | 0  | 0   |
| Nav_capi  | 0  | 0  | 0  | 0   | 0  | 0  | 0  | 0  | 0  | 0   |
| Nav_cinc  | 0  | 0  | 0  | 0   | 1  | 1  | 1  | 0  | 0  | 0   |
| Nav_clem  | 0  | 0  | 0  | 0   | 0  | 0  | 0  | 0  | 0  | 0   |
| Nav_cryp  | 0  | 2  | 1  | 0   | 0  | 0  | 0  | 0  | 0  | 0   |
| Nav_digi  | 0  | 0  | 0  | 0   | 0  | 0  | 0  | 0  | 0  | 0   |
| Nav_duer  | 0  | 0  | 0  | 0   | 0  | 0  | 0  | 0  | 0  | 4   |
| Nav_eidr  | 0  | 0  | 0  | 0   | 0  | 0  | 0  | 0  | 0  | 0   |
| Nav_flan  | 0  | 0  | 0  | 0   | 0  | 0  | 0  | 0  | 0  | 0   |
| Nav_geii  | 0  | 0  | 0  | 0   | 0  | 0  | 0  | 0  | 0  | 0   |
| Nav_gepo  | 0  | 0  | 0  | 0   | 0  | 0  | 0  | 0  | 0  | 0   |
| Nav_greg  | 12 | 12 | 10 | 16  | 11 | 3  | 9  | 13 | 4  | 27  |





|          |    |    |    |     |     |    |    |    |    |     |
|----------|----|----|----|-----|-----|----|----|----|----|-----|
| Plt_freq | 0  | 0  | 0  | 0   | 0   | 0  | 0  | 0  | 0  | 0   |
| Plt_hauc | 13 | 6  | 0  | 8   | 6   | 0  | 1  | 15 | 2  | 10  |
| Plt_lanc | 0  | 0  | 0  | 0   | 0   | 0  | 0  | 0  | 0  | 0   |
| Plt_lemm | 0  | 0  | 0  | 0   | 0   | 0  | 0  | 0  | 0  | 0   |
| Plt_link | 0  | 0  | 0  | 0   | 0   | 0  | 0  | 0  | 0  | 0   |
| Plt_peri | 0  | 1  | 0  | 0   | 0   | 0  | 0  | 0  | 0  | 8   |
| Plt_rost | 0  | 0  | 0  | 0   | 0   | 0  | 0  | 0  | 0  | 0   |
| Plt_sept | 0  | 0  | 0  | 0   | 0   | 0  | 0  | 0  | 0  | 0   |
| Psf_tene | 0  | 0  | 0  | 0   | 0   | 0  | 0  | 0  | 0  | 0   |
| Pss_brev | 0  | 0  | 0  | 0   | 0   | 0  | 0  | 0  | 0  | 56  |
| Pss_brin | 0  | 0  | 0  | 0   | 0   | 0  | 1  | 0  | 0  | 6   |
| Pss_elli | 0  | 0  | 0  | 8   | 5   | 0  | 0  | 0  | 0  | 17  |
| Pss_perm | 10 | 1  | 0  | 55  | 21  | 2  | 7  | 5  | 3  | 171 |
| Pss_robu | 0  | 0  | 0  | 0   | 0   | 0  | 0  | 0  | 0  | 0   |
| Pss_subs | 0  | 0  | 0  | 0   | 0   | 0  | 0  | 0  | 0  | 0   |
| Pss_zeil | 2  | 3  | 1  | 13  | 24  | 0  | 0  | 3  | 0  | 26  |
| Pst_bior | 0  | 0  | 0  | 0   | 0   | 0  | 0  | 0  | 0  | 0   |
| Pst_oblo | 0  | 0  | 0  | 3   | 0   | 0  | 0  | 0  | 0  | 0   |
| Pst_punc | 5  | 1  | 1  | 0   | 2   | 0  | 0  | 5  | 0  | 1   |
| Pst_ross | 0  | 0  | 0  | 0   | 0   | 0  | 0  | 0  | 0  | 0   |
| Pst_sacc | 0  | 0  | 0  | 0   | 0   | 0  | 0  | 0  | 0  | 0   |
| Pte_inan | 0  | 0  | 0  | 0   | 0   | 0  | 0  | 0  | 0  | 0   |
| Rei_sinu | 0  | 0  | 0  | 0   | 0   | 0  | 0  | 0  | 0  | 0   |
| Rho_abbr | 58 | 87 | 20 | 171 | 130 | 40 | 64 | 65 | 51 | 18  |
| Rhp_acum | 0  | 0  | 0  | 0   | 0   | 0  | 0  | 0  | 0  | 0   |
| Rhp_breb | 0  | 0  | 0  | 0   | 0   | 0  | 0  | 0  | 0  | 0   |
| Rhp_gibb | 0  | 0  | 0  | 0   | 0   | 0  | 0  | 0  | 0  | 0   |
| Sel_pupu | 0  | 0  | 0  | 0   | 0   | 0  | 0  | 0  | 0  | 0   |
| Sel_stro | 0  | 0  | 0  | 0   | 0   | 0  | 0  | 0  | 0  | 0   |
| Ske_cost | 0  | 0  | 0  | 0   | 0   | 0  | 0  | 0  | 0  | 0   |
| Ske_subs | 0  | 0  | 0  | 0   | 0   | 0  | 0  | 0  | 0  | 0   |
| Sla_lapp | 0  | 0  | 0  | 0   | 0   | 0  | 0  | 0  | 0  | 0   |
| Std_hant | 0  | 0  | 0  | 0   | 0   | 0  | 0  | 0  | 0  | 0   |
| Std_parv | 0  | 0  | 0  | 0   | 0   | 0  | 0  | 0  | 0  | 0   |
| Stn_legu | 0  | 0  | 0  | 0   | 0   | 0  | 0  | 0  | 0  | 0   |
| Stn_phoe | 0  | 0  | 0  | 0   | 0   | 0  | 0  | 0  | 0  | 0   |
| Stn_simu | 0  | 0  | 0  | 0   | 0   | 0  | 0  | 0  | 0  | 0   |
| Stn_smka | 0  | 0  | 0  | 0   | 0   | 0  | 0  | 0  | 0  | 0   |
| Stp_anus | 0  | 0  | 0  | 0   | 0   | 0  | 0  | 0  | 0  | 0   |
| Stp_wisl | 0  | 0  | 0  | 0   | 0   | 0  | 0  | 0  | 0  | 1   |
| Sts_punc | 5  | 0  | 0  | 83  | 39  | 0  | 0  | 5  | 4  | 95  |













|           |    |   |    |    |    |    |    |    |    |   |    |
|-----------|----|---|----|----|----|----|----|----|----|---|----|
| Kar_niti  | 0  | 0 | 0  | 0  | 0  | 0  | 0  | 0  | 0  | 0 | 0  |
| Kar_subm  | 0  | 0 | 0  | 0  | 0  | 0  | 0  | 0  | 0  | 0 | 0  |
| Lemn_hung | 0  | 0 | 0  | 0  | 0  | 0  | 0  | 0  | 0  | 0 | 0  |
| Lic_debi  | 0  | 0 | 0  | 0  | 0  | 0  | 0  | 0  | 0  | 0 | 0  |
| Lic_gran  | 12 | 3 | 3  | 4  | 9  | 9  | 38 | 1  | 3  | 4 | 13 |
| Lic_oedi  | 0  | 0 | 0  | 0  | 0  | 0  | 0  | 0  | 0  | 0 | 0  |
| Lic_rhom  | 0  | 0 | 0  | 0  | 0  | 0  | 0  | 0  | 0  | 0 | 0  |
| Lun_bise  | 3  | 1 | 27 | 24 | 22 | 24 | 8  | 18 | 37 | 8 | 11 |
| Lut_muti  | 0  | 0 | 0  | 0  | 0  | 0  | 0  | 0  | 0  | 0 | 0  |
| Mar_atom  | 1  | 0 | 0  | 0  | 2  | 2  | 1  | 0  | 0  | 0 | 1  |
| Mar_mart  | 0  | 0 | 2  | 2  | 0  | 10 | 1  | 1  | 0  | 3 | 0  |
| Mar_schu  | 0  | 0 | 0  | 0  | 0  | 0  | 0  | 0  | 0  | 3 | 0  |
| Mas_balt  | 0  | 0 | 0  | 0  | 0  | 0  | 0  | 0  | 0  | 0 | 0  |
| Mas_brau  | 0  | 0 | 0  | 0  | 0  | 0  | 0  | 0  | 0  | 0 | 0  |
| Mas_elli  | 0  | 0 | 1  | 0  | 0  | 0  | 0  | 1  | 2  | 1 | 0  |
| Mas_exig  | 0  | 0 | 0  | 0  | 0  | 0  | 0  | 0  | 0  | 0 | 0  |
| Mas_pumi  | 0  | 0 | 0  | 0  | 0  | 0  | 0  | 0  | 0  | 0 | 0  |
| Mas_pusi  | 0  | 0 | 0  | 0  | 0  | 1  | 0  | 0  | 0  | 0 | 0  |
| Mas_smam  | 0  | 0 | 6  | 0  | 1  | 2  | 6  | 0  | 0  | 3 | 1  |
| Mas_smit  | 0  | 0 | 1  | 2  | 0  | 0  | 3  | 1  | 0  | 2 | 8  |
| Mel_arct  | 0  | 0 | 0  | 0  | 0  | 0  | 0  | 0  | 4  | 0 | 0  |
| Mel_line  | 0  | 0 | 1  | 0  | 5  | 0  | 1  | 13 | 5  | 1 | 1  |
| Mel_moni  | 0  | 0 | 0  | 0  | 0  | 0  | 0  | 2  | 0  | 4 | 0  |
| Mel_numm  | 0  | 0 | 0  | 0  | 0  | 0  | 0  | 2  | 0  | 0 | 0  |
| Mel_vari  | 0  | 0 | 0  | 0  | 0  | 0  | 0  | 0  | 5  | 0 | 0  |
| Nav_aren  | 0  | 0 | 0  | 0  | 0  | 0  | 0  | 0  | 0  | 0 | 0  |
| Nav_bipu  | 0  | 0 | 0  | 0  | 0  | 0  | 0  | 0  | 0  | 1 | 0  |
| Nav_boss  | 0  | 0 | 0  | 0  | 0  | 0  | 0  | 0  | 0  | 0 | 0  |
| Nav_bott  | 2  | 1 | 1  | 5  | 9  | 0  | 0  | 0  | 0  | 0 | 0  |
| Nav_brem  | 0  | 0 | 0  | 0  | 0  | 0  | 0  | 0  | 0  | 0 | 0  |
| Nav_capi  | 0  | 0 | 0  | 0  | 0  | 0  | 0  | 0  | 0  | 0 | 0  |
| Nav_cinc  | 0  | 0 | 0  | 0  | 0  | 0  | 0  | 0  | 0  | 0 | 0  |
| Nav_clem  | 0  | 0 | 0  | 0  | 0  | 0  | 0  | 0  | 0  | 0 | 0  |
| Nav_cryp  | 0  | 0 | 0  | 0  | 0  | 0  | 0  | 0  | 0  | 0 | 0  |
| Nav_digi  | 0  | 0 | 0  | 0  | 0  | 0  | 0  | 0  | 0  | 0 | 0  |
| Nav_duer  | 0  | 0 | 0  | 0  | 0  | 0  | 0  | 0  | 0  | 0 | 0  |
| Nav_eidr  | 0  | 0 | 0  | 0  | 0  | 0  | 0  | 0  | 0  | 0 | 0  |
| Nav_flan  | 0  | 0 | 0  | 0  | 0  | 0  | 0  | 0  | 0  | 0 | 0  |
| Nav_geii  | 0  | 0 | 0  | 0  | 0  | 0  | 0  | 0  | 0  | 0 | 1  |
| Nav_gepo  | 0  | 0 | 0  | 2  | 3  | 5  | 0  | 3  | 6  | 2 | 0  |
| Nav_greg  | 8  | 2 | 21 | 18 | 26 | 4  | 1  | 23 | 8  | 3 | 0  |













|          |    |    |    |   |    |    |    |   |    |    |    |    |    |   |
|----------|----|----|----|---|----|----|----|---|----|----|----|----|----|---|
| Cal_amph | 0  | 0  | 0  | 0 | 0  | 0  | 0  | 0 | 0  | 0  | 0  | 0  | 0  | 0 |
| Cal_baci | 0  | 0  | 0  | 1 | 0  | 0  | 1  | 0 | 0  | 0  | 0  | 0  | 0  | 0 |
| Cal_cras | 0  | 0  | 0  | 0 | 0  | 0  | 0  | 0 | 0  | 0  | 0  | 0  | 0  | 0 |
| Cal_sili | 0  | 0  | 0  | 0 | 0  | 0  | 0  | 0 | 0  | 0  | 0  | 0  | 0  | 0 |
| Cam_clyp | 0  | 0  | 0  | 0 | 0  | 0  | 0  | 0 | 0  | 0  | 0  | 0  | 0  | 0 |
| Cat_adha | 0  | 0  | 0  | 0 | 0  | 0  | 0  | 0 | 0  | 0  | 0  | 0  | 0  | 0 |
| Cav_lapi | 0  | 0  | 0  | 0 | 0  | 0  | 0  | 0 | 0  | 0  | 0  | 0  | 0  | 0 |
| Cav_pseu | 0  | 0  | 0  | 0 | 0  | 0  | 0  | 0 | 0  | 0  | 0  | 0  | 0  | 0 |
| Cer_clos | 0  | 0  | 0  | 0 | 0  | 0  | 0  | 0 | 0  | 0  | 0  | 0  | 0  | 0 |
| Chp_clam | 0  | 0  | 0  | 0 | 0  | 0  | 0  | 0 | 0  | 0  | 0  | 0  | 0  | 0 |
| Chp_marg | 0  | 0  | 0  | 0 | 1  | 1  | 0  | 0 | 0  | 0  | 0  | 1  | 0  | 0 |
| Coc_cost | 0  | 0  | 0  | 0 | 0  | 0  | 0  | 0 | 0  | 0  | 0  | 0  | 0  | 0 |
| Coc_neot | 2  | 3  | 2  | 1 | 4  | 2  | 14 | 9 | 13 | 10 | 0  | 0  | 1  | 0 |
| Coc_pedi | 8  | 1  | 3  | 3 | 1  | 6  | 7  | 1 | 0  | 2  | 1  | 3  | 3  | 3 |
| Coc_pelt | 0  | 0  | 0  | 0 | 0  | 0  | 0  | 0 | 0  | 0  | 0  | 0  | 0  | 0 |
| Coc_plac | 0  | 2  | 1  | 1 | 2  | 4  | 11 | 2 | 1  | 7  | 0  | 0  | 2  | 0 |
| Coc_pleu | 0  | 0  | 0  | 0 | 0  | 0  | 0  | 0 | 0  | 0  | 0  | 0  | 0  | 0 |
| Coc_plli | 0  | 0  | 0  | 0 | 0  | 0  | 0  | 0 | 0  | 0  | 0  | 0  | 0  | 0 |
| Coc_psli | 0  | 0  | 0  | 0 | 0  | 0  | 0  | 0 | 0  | 0  | 0  | 0  | 0  | 0 |
| Coc_psth | 0  | 0  | 0  | 0 | 0  | 0  | 0  | 0 | 0  | 0  | 0  | 0  | 0  | 0 |
| Coc_scut | 0  | 0  | 0  | 0 | 0  | 0  | 0  | 0 | 0  | 0  | 0  | 0  | 0  | 0 |
| Coc_stau | 0  | 0  | 0  | 0 | 0  | 0  | 0  | 0 | 0  | 0  | 0  | 0  | 0  | 0 |
| Com_pusi | 0  | 0  | 0  | 0 | 0  | 0  | 0  | 0 | 0  | 0  | 0  | 0  | 0  | 0 |
| Cos_aste | 0  | 0  | 0  | 0 | 0  | 0  | 0  | 0 | 0  | 0  | 0  | 0  | 0  | 0 |
| Cte_pulc | 8  | 51 | 11 | 5 | 38 | 19 | 18 | 5 | 15 | 13 | 0  | 14 | 12 | 6 |
| Cyc_atom | 0  | 0  | 0  | 0 | 0  | 0  | 0  | 0 | 0  | 0  | 0  | 0  | 0  | 0 |
| Cyc_choc | 0  | 0  | 0  | 0 | 0  | 0  | 0  | 0 | 0  | 0  | 0  | 0  | 0  | 0 |
| Cyc_mene | 0  | 0  | 0  | 0 | 0  | 0  | 1  | 4 | 0  | 0  | 0  | 0  | 0  | 0 |
| Cyc_radi | 0  | 0  | 0  | 0 | 0  | 0  | 0  | 0 | 0  | 0  | 0  | 0  | 0  | 0 |
| Cyc_ross | 0  | 0  | 0  | 0 | 0  | 0  | 0  | 0 | 1  | 1  | 0  | 0  | 0  | 0 |
| Cyc_stel | 0  | 0  | 0  | 0 | 0  | 0  | 0  | 0 | 0  | 0  | 0  | 0  | 0  | 0 |
| Cyc_stri | 0  | 0  | 0  | 0 | 0  | 0  | 0  | 0 | 0  | 0  | 0  | 0  | 0  | 0 |
| Cyc_trip | 0  | 0  | 0  | 0 | 0  | 0  | 0  | 0 | 0  | 0  | 0  | 0  | 0  | 0 |
| Cym_affi | 15 | 7  | 2  | 1 | 9  | 5  | 8  | 0 | 2  | 3  | 0  | 0  | 5  | 1 |
| Cym_cist | 0  | 0  | 0  | 0 | 1  | 0  | 0  | 0 | 0  | 0  | 0  | 0  | 0  | 0 |
| Cym_helv | 11 | 26 | 4  | 9 | 10 | 2  | 8  | 1 | 2  | 0  | 11 | 47 | 4  | 5 |
| Cym_lanc | 2  | 3  | 0  | 0 | 0  | 1  | 0  | 0 | 0  | 0  | 0  | 1  | 0  | 1 |
| Cym_prox | 0  | 0  | 0  | 0 | 0  | 0  | 0  | 0 | 0  | 0  | 0  | 0  | 0  | 0 |
| Cyp_sole | 0  | 0  | 0  | 0 | 0  | 0  | 0  | 0 | 0  | 0  | 0  | 0  | 0  | 0 |
| Cys_dubi | 0  | 0  | 1  | 0 | 0  | 0  | 0  | 0 | 0  | 0  | 2  | 0  | 0  | 0 |
| Den_tecr | 13 | 20 | 27 | 2 | 33 | 35 | 35 | 0 | 5  | 4  | 0  | 1  | 1  | 0 |



|          |    |    |    |    |    |    |    |    |    |    |    |    |    |    |
|----------|----|----|----|----|----|----|----|----|----|----|----|----|----|----|
| Fra_amic | 0  | 0  | 0  | 0  | 0  | 0  | 0  | 0  | 0  | 0  | 0  | 0  | 0  | 0  |
| Fra_capu | 0  | 0  | 0  | 0  | 0  | 0  | 0  | 0  | 0  | 0  | 0  | 0  | 6  | 1  |
| Fra_caru | 23 | 59 | 29 | 17 | 44 | 30 | 12 | 60 | 87 | 36 | 4  | 2  | 13 | 3  |
| Fra_cava | 16 | 72 | 43 | 36 | 56 | 46 | 17 | 3  | 32 | 43 | 15 | 29 | 17 | 11 |
| Fra_cons | 0  | 0  | 0  | 0  | 0  | 0  | 0  | 0  | 0  | 0  | 0  | 0  | 0  | 0  |
| Fra_geda | 0  | 0  | 0  | 0  | 0  | 0  | 0  | 0  | 0  | 0  | 0  | 0  | 0  | 0  |
| Fra_grac | 0  | 0  | 0  | 0  | 9  | 2  | 6  | 52 | 4  | 0  | 0  | 0  | 0  | 0  |
| Fra_hydu | 0  | 0  | 0  | 0  | 0  | 0  | 0  | 0  | 0  | 0  | 0  | 0  | 0  | 0  |
| Fra_lept | 0  | 0  | 0  | 0  | 0  | 0  | 0  | 0  | 0  | 0  | 0  | 0  | 0  | 0  |
| Fra_nitz | 0  | 0  | 0  | 0  | 0  | 0  | 0  | 0  | 0  | 3  | 0  | 0  | 0  | 0  |
| Frp_cyli | 1  | 2  | 2  | 1  | 4  | 2  | 0  | 0  | 2  | 2  | 3  | 0  | 1  | 4  |
| Fru_vulg | 0  | 0  | 0  | 0  | 0  | 0  | 0  | 0  | 0  | 0  | 0  | 0  | 0  | 0  |
| Gom_clav | 0  | 0  | 0  | 0  | 0  | 0  | 0  | 0  | 0  | 0  | 0  | 0  | 0  | 0  |
| Gom_intr | 2  | 2  | 2  | 2  | 5  | 2  | 1  | 3  | 1  | 6  | 8  | 0  | 1  | 27 |
| Gom_oliv | 18 | 20 | 13 | 9  | 6  | 8  | 5  | 0  | 9  | 37 | 23 | 30 | 5  | 4  |
| Gom_parv | 0  | 0  | 0  | 0  | 0  | 0  | 0  | 0  | 0  | 0  | 0  | 0  | 0  | 1  |
| Gon_exig | 0  | 0  | 0  | 0  | 0  | 0  | 0  | 0  | 0  | 0  | 0  | 0  | 0  | 0  |
| Gos_expl | 0  | 0  | 0  | 0  | 0  | 0  | 0  | 0  | 0  | 0  | 0  | 0  | 0  | 0  |
| Gos_obsc | 0  | 0  | 0  | 0  | 0  | 0  | 0  | 0  | 0  | 0  | 0  | 0  | 0  | 0  |
| Gra_mari | 0  | 0  | 0  | 0  | 0  | 0  | 0  | 0  | 0  | 0  | 0  | 0  | 0  | 0  |
| Gra_ocea | 0  | 0  | 0  | 0  | 0  | 0  | 0  | 0  | 0  | 0  | 0  | 0  | 0  | 0  |
| Gyr_acum | 0  | 0  | 0  | 0  | 0  | 0  | 0  | 0  | 0  | 0  | 0  | 0  | 0  | 0  |
| Gyr_atte | 0  | 0  | 0  | 0  | 0  | 0  | 0  | 0  | 0  | 0  | 0  | 0  | 0  | 0  |
| Gyr_stri | 0  | 0  | 0  | 0  | 0  | 0  | 0  | 0  | 0  | 0  | 0  | 0  | 0  | 0  |
| Gyr_tenu | 0  | 0  | 0  | 0  | 0  | 0  | 0  | 0  | 0  | 0  | 0  | 0  | 0  | 0  |
| Hal_coff | 0  | 0  | 0  | 0  | 0  | 0  | 4  | 1  | 2  | 4  | 0  | 0  | 0  | 0  |
| Hal_exig | 0  | 0  | 0  | 0  | 0  | 0  | 1  | 0  | 0  | 0  | 0  | 0  | 0  | 0  |
| Hal_hols | 0  | 0  | 0  | 0  | 0  | 0  | 0  | 0  | 0  | 0  | 0  | 0  | 1  | 0  |
| Hal_hybr | 0  | 0  | 0  | 0  | 0  | 0  | 0  | 1  | 0  | 0  | 0  | 0  | 2  | 0  |
| Hal_luci | 0  | 0  | 0  | 0  | 0  | 0  | 1  | 0  | 0  | 0  | 0  | 0  | 0  | 0  |
| Hal_norm | 0  | 0  | 0  | 0  | 0  | 0  | 0  | 0  | 0  | 0  | 0  | 0  | 0  | 0  |
| Hal_subh | 0  | 0  | 0  | 0  | 0  | 0  | 0  | 0  | 0  | 0  | 0  | 0  | 0  | 0  |
| Hal_tene | 0  | 0  | 3  | 1  | 0  | 0  | 18 | 3  | 0  | 0  | 0  | 0  | 0  | 0  |
| Hal_vene | 1  | 3  | 1  | 0  | 3  | 2  | 5  | 8  | 1  | 0  | 0  | 0  | 0  | 1  |
| Han_balt | 0  | 0  | 0  | 0  | 0  | 0  | 0  | 1  | 0  | 0  | 0  | 0  | 0  | 0  |
| Has_spic | 0  | 0  | 0  | 0  | 0  | 0  | 0  | 0  | 2  | 0  | 0  | 0  | 0  | 0  |
| Hip_capi | 0  | 0  | 0  | 0  | 0  | 0  | 2  | 1  | 0  | 0  | 0  | 0  | 0  | 0  |
| Hip_hung | 0  | 0  | 0  | 0  | 0  | 0  | 0  | 0  | 0  | 0  | 0  | 0  | 0  | 0  |
| Hip_lesm | 0  | 0  | 0  | 0  | 0  | 0  | 0  | 0  | 0  | 0  | 0  | 0  | 0  | 0  |
| Kar_amoe | 0  | 0  | 0  | 0  | 0  | 0  | 0  | 0  | 0  | 0  | 0  | 0  | 0  | 0  |
| Kar_clev | 0  | 0  | 1  | 0  | 0  | 0  | 0  | 0  | 2  | 3  | 0  | 0  | 1  | 0  |

|           |   |   |   |   |   |   |    |    |    |    |   |   |   |   |
|-----------|---|---|---|---|---|---|----|----|----|----|---|---|---|---|
| Kar_niti  | 0 | 0 | 0 | 0 | 0 | 0 | 0  | 0  | 0  | 0  | 0 | 0 | 0 | 0 |
| Kar_subm  | 0 | 0 | 0 | 0 | 0 | 0 | 0  | 0  | 0  | 0  | 0 | 0 | 0 | 0 |
| Lemn_hung | 0 | 1 | 0 | 0 | 0 | 0 | 0  | 1  | 0  | 0  | 0 | 0 | 0 | 0 |
| Lic_debi  | 0 | 0 | 0 | 0 | 0 | 0 | 0  | 0  | 0  | 0  | 0 | 0 | 0 | 0 |
| Lic_gran  | 0 | 0 | 0 | 0 | 0 | 0 | 0  | 0  | 0  | 0  | 0 | 0 | 0 | 0 |
| Lic_oedi  | 0 | 0 | 0 | 0 | 0 | 0 | 0  | 0  | 0  | 0  | 0 | 0 | 0 | 0 |
| Lic_rhom  | 0 | 0 | 0 | 0 | 0 | 0 | 0  | 0  | 0  | 0  | 0 | 0 | 0 | 0 |
| Lun_bise  | 0 | 4 | 2 | 1 | 1 | 1 | 10 | 1  | 8  | 0  | 0 | 0 | 0 | 6 |
| Lut_muti  | 0 | 0 | 0 | 0 | 0 | 0 | 0  | 0  | 0  | 0  | 0 | 0 | 0 | 0 |
| Mar_atom  | 0 | 0 | 0 | 0 | 0 | 0 | 41 | 12 | 25 | 30 | 0 | 0 | 0 | 0 |
| Mar_mart  | 0 | 0 | 2 | 0 | 6 | 0 | 44 | 14 | 8  | 32 | 0 | 0 | 5 | 0 |
| Mar_schu  | 0 | 0 | 1 | 0 | 7 | 1 | 33 | 89 | 22 | 7  | 1 | 0 | 2 | 0 |
| Mas_balt  | 0 | 0 | 0 | 0 | 0 | 0 | 0  | 0  | 0  | 0  | 0 | 0 | 0 | 0 |
| Mas_brau  | 0 | 0 | 0 | 0 | 0 | 0 | 0  | 0  | 0  | 0  | 0 | 0 | 0 | 0 |
| Mas_elli  | 0 | 0 | 0 | 0 | 1 | 0 | 0  | 0  | 0  | 0  | 0 | 0 | 0 | 0 |
| Mas_exig  | 0 | 0 | 0 | 0 | 0 | 0 | 0  | 0  | 0  | 0  | 0 | 0 | 0 | 0 |
| Mas_pumi  | 0 | 0 | 0 | 0 | 0 | 0 | 0  | 0  | 0  | 0  | 0 | 0 | 0 | 0 |
| Mas_pusi  | 0 | 0 | 0 | 0 | 0 | 0 | 0  | 0  | 0  | 0  | 0 | 0 | 0 | 0 |
| Mas_smam  | 1 | 0 | 0 | 0 | 4 | 0 | 0  | 2  | 0  | 2  | 0 | 0 | 0 | 0 |
| Mas_smit  | 0 | 0 | 2 | 0 | 0 | 1 | 1  | 0  | 1  | 1  | 0 | 0 | 1 | 0 |
| Mel_arct  | 0 | 0 | 0 | 0 | 0 | 0 | 0  | 0  | 0  | 0  | 0 | 0 | 1 | 0 |
| Mel_line  | 0 | 0 | 0 | 0 | 0 | 0 | 0  | 0  | 0  | 0  | 0 | 0 | 0 | 0 |
| Mel_moni  | 0 | 0 | 0 | 0 | 0 | 0 | 0  | 0  | 0  | 0  | 0 | 0 | 0 | 0 |
| Mel_numm  | 0 | 0 | 0 | 0 | 0 | 0 | 0  | 0  | 0  | 0  | 0 | 0 | 0 | 0 |
| Mel_vari  | 0 | 0 | 0 | 0 | 0 | 0 | 0  | 0  | 0  | 0  | 0 | 0 | 0 | 0 |
| Nav_aren  | 0 | 0 | 0 | 0 | 0 | 0 | 0  | 0  | 0  | 0  | 0 | 0 | 0 | 0 |
| Nav_bipu  | 0 | 0 | 0 | 0 | 0 | 0 | 0  | 0  | 0  | 0  | 0 | 0 | 0 | 0 |
| Nav_boss  | 0 | 0 | 0 | 0 | 0 | 0 | 0  | 0  | 0  | 0  | 0 | 0 | 0 | 0 |
| Nav_bott  | 1 | 1 | 1 | 0 | 0 | 0 | 2  | 0  | 0  | 0  | 0 | 1 | 0 | 1 |
| Nav_brem  | 0 | 0 | 0 | 0 | 0 | 0 | 0  | 0  | 0  | 0  | 0 | 0 | 0 | 0 |
| Nav_capi  | 0 | 0 | 0 | 0 | 0 | 0 | 0  | 0  | 0  | 0  | 0 | 0 | 0 | 0 |
| Nav_cinc  | 0 | 0 | 0 | 0 | 0 | 0 | 0  | 0  | 0  | 1  | 0 | 0 | 0 | 0 |
| Nav_clem  | 0 | 0 | 0 | 0 | 0 | 0 | 2  | 0  | 0  | 0  | 0 | 0 | 1 | 0 |
| Nav_cryp  | 2 | 3 | 0 | 0 | 7 | 1 | 2  | 2  | 7  | 1  | 0 | 0 | 0 | 0 |
| Nav_digi  | 0 | 0 | 0 | 0 | 0 | 0 | 0  | 0  | 0  | 0  | 0 | 0 | 0 | 0 |
| Nav_duer  | 0 | 0 | 0 | 0 | 0 | 0 | 0  | 0  | 0  | 0  | 0 | 0 | 0 | 0 |
| Nav_eidr  | 0 | 0 | 0 | 0 | 0 | 0 | 0  | 0  | 0  | 0  | 0 | 0 | 0 | 0 |
| Nav_flan  | 0 | 0 | 0 | 0 | 0 | 0 | 0  | 0  | 1  | 0  | 0 | 0 | 0 | 0 |
| Nav_geii  | 0 | 0 | 0 | 0 | 0 | 0 | 0  | 0  | 0  | 0  | 0 | 0 | 0 | 0 |
| Nav_gepo  | 0 | 0 | 0 | 0 | 0 | 0 | 4  | 0  | 0  | 0  | 0 | 0 | 0 | 0 |
| Nav_greg  | 0 | 3 | 1 | 1 | 2 | 3 | 26 | 12 | 7  | 6  | 0 | 0 | 3 | 0 |













|          |     |    |     |     |     |    |   |    |    |    |   |    |    |    |
|----------|-----|----|-----|-----|-----|----|---|----|----|----|---|----|----|----|
| Cal_amph | 0   | 0  | 0   | 0   | 0   | 0  | 0 | 1  | 0  | 0  | 0 | 0  | 0  | 0  |
| Cal_baci | 0   | 0  | 1   | 0   | 0   | 0  | 2 | 0  | 0  | 0  | 0 | 0  | 0  | 0  |
| Cal_cras | 0   | 0  | 0   | 0   | 0   | 0  | 0 | 0  | 0  | 0  | 0 | 0  | 0  | 0  |
| Cal_sili | 0   | 0  | 0   | 0   | 0   | 0  | 1 | 0  | 0  | 0  | 0 | 0  | 0  | 0  |
| Cam_clyp | 0   | 0  | 0   | 0   | 0   | 0  | 0 | 0  | 0  | 0  | 0 | 0  | 0  | 0  |
| Cat_adha | 0   | 0  | 0   | 0   | 0   | 0  | 0 | 0  | 0  | 0  | 0 | 0  | 0  | 0  |
| Cav_lapi | 0   | 0  | 0   | 0   | 0   | 0  | 0 | 0  | 0  | 0  | 0 | 0  | 0  | 0  |
| Cav_pseu | 0   | 0  | 0   | 0   | 0   | 0  | 0 | 0  | 0  | 0  | 0 | 0  | 0  | 0  |
| Cer_clos | 0   | 0  | 0   | 0   | 0   | 0  | 0 | 0  | 0  | 0  | 0 | 0  | 0  | 0  |
| Chp_clam | 0   | 0  | 0   | 0   | 0   | 0  | 0 | 0  | 0  | 0  | 0 | 0  | 0  | 0  |
| Chp_marg | 0   | 0  | 0   | 0   | 0   | 1  | 0 | 0  | 0  | 0  | 0 | 0  | 0  | 1  |
| Coc_cost | 0   | 0  | 0   | 0   | 0   | 0  | 0 | 0  | 0  | 0  | 0 | 0  | 0  | 0  |
| Coc_neot | 0   | 0  | 0   | 3   | 0   | 0  | 2 | 0  | 0  | 0  | 0 | 0  | 0  | 1  |
| Coc_pedi | 1   | 0  | 1   | 4   | 1   | 0  | 0 | 0  | 3  | 0  | 0 | 0  | 0  | 0  |
| Coc_pelt | 0   | 0  | 0   | 0   | 0   | 0  | 0 | 0  | 0  | 0  | 0 | 0  | 0  | 0  |
| Coc_plac | 2   | 3  | 5   | 0   | 1   | 3  | 9 | 7  | 2  | 0  | 0 | 1  | 1  | 4  |
| Coc_pleu | 0   | 0  | 0   | 0   | 0   | 0  | 0 | 0  | 0  | 0  | 0 | 0  | 0  | 0  |
| Coc_plli | 0   | 0  | 0   | 0   | 0   | 0  | 0 | 0  | 0  | 0  | 0 | 0  | 0  | 0  |
| Coc_psli | 0   | 0  | 0   | 0   | 0   | 0  | 0 | 0  | 0  | 0  | 0 | 0  | 0  | 0  |
| Coc_psth | 0   | 0  | 0   | 0   | 0   | 0  | 0 | 0  | 0  | 0  | 0 | 0  | 0  | 0  |
| Coc_scut | 0   | 0  | 0   | 0   | 0   | 0  | 0 | 0  | 0  | 0  | 0 | 0  | 0  | 0  |
| Coc_stau | 0   | 0  | 0   | 0   | 0   | 0  | 0 | 0  | 0  | 0  | 0 | 0  | 0  | 0  |
| Com_pusi | 0   | 0  | 0   | 0   | 0   | 0  | 0 | 0  | 0  | 0  | 0 | 0  | 0  | 0  |
| Cos_aste | 0   | 0  | 0   | 0   | 0   | 0  | 0 | 0  | 0  | 0  | 0 | 0  | 0  | 0  |
| Cte_pulc | 1   | 11 | 13  | 181 | 17  | 5  | 0 | 0  | 6  | 2  | 0 | 9  | 0  | 4  |
| Cyc_atom | 0   | 0  | 0   | 0   | 0   | 0  | 0 | 0  | 0  | 0  | 0 | 0  | 0  | 0  |
| Cyc_choc | 0   | 0  | 0   | 0   | 0   | 0  | 0 | 0  | 0  | 0  | 0 | 0  | 0  | 0  |
| Cyc_mene | 0   | 0  | 0   | 0   | 0   | 0  | 2 | 0  | 0  | 0  | 0 | 0  | 0  | 0  |
| Cyc_radi | 0   | 0  | 0   | 0   | 0   | 0  | 0 | 0  | 0  | 0  | 0 | 0  | 0  | 0  |
| Cyc_ross | 0   | 0  | 1   | 0   | 0   | 0  | 0 | 2  | 0  | 0  | 0 | 0  | 0  | 0  |
| Cyc_stel | 0   | 0  | 0   | 0   | 0   | 0  | 0 | 1  | 0  | 0  | 0 | 0  | 0  | 0  |
| Cyc_stri | 0   | 0  | 0   | 0   | 0   | 0  | 0 | 0  | 0  | 0  | 0 | 0  | 0  | 0  |
| Cyc_trip | 0   | 0  | 0   | 0   | 0   | 0  | 0 | 0  | 0  | 0  | 0 | 0  | 0  | 0  |
| Cym_affi | 38  | 47 | 29  | 6   | 24  | 53 | 4 | 10 | 2  | 10 | 7 | 12 | 32 | 42 |
| Cym_cist | 0   | 0  | 0   | 0   | 0   | 0  | 0 | 0  | 0  | 0  | 0 | 0  | 0  | 0  |
| Cym_helv | 7   | 11 | 11  | 4   | 6   | 8  | 3 | 9  | 2  | 0  | 1 | 2  | 7  | 11 |
| Cym_lanc | 0   | 0  | 2   | 0   | 0   | 0  | 0 | 0  | 1  | 0  | 0 | 0  | 0  | 1  |
| Cym_prox | 0   | 0  | 0   | 0   | 0   | 0  | 0 | 0  | 0  | 0  | 0 | 0  | 0  | 0  |
| Cyp_sole | 0   | 0  | 0   | 0   | 0   | 0  | 0 | 0  | 0  | 0  | 0 | 0  | 0  | 0  |
| Cys_dubi | 0   | 0  | 0   | 0   | 0   | 0  | 0 | 0  | 0  | 0  | 0 | 0  | 0  | 0  |
| Den_tecr | 114 | 90 | 103 | 68  | 115 | 91 | 6 | 75 | 41 | 3  | 2 | 3  | 11 | 39 |





|           |   |   |   |   |   |   |     |   |    |   |   |   |   |   |
|-----------|---|---|---|---|---|---|-----|---|----|---|---|---|---|---|
| Kar_niti  | 0 | 0 | 0 | 0 | 0 | 0 | 0   | 0 | 0  | 0 | 0 | 0 | 0 | 0 |
| Kar_subm  | 0 | 0 | 0 | 0 | 0 | 0 | 0   | 0 | 0  | 0 | 0 | 0 | 0 | 0 |
| Lemn_hung | 0 | 0 | 0 | 0 | 0 | 0 | 0   | 0 | 0  | 0 | 0 | 0 | 0 | 0 |
| Lic_debi  | 0 | 0 | 0 | 0 | 0 | 0 | 0   | 0 | 0  | 0 | 0 | 0 | 0 | 0 |
| Lic_gran  | 0 | 0 | 0 | 0 | 0 | 0 | 0   | 0 | 0  | 0 | 0 | 0 | 0 | 0 |
| Lic_oedi  | 0 | 0 | 0 | 0 | 0 | 0 | 0   | 0 | 0  | 0 | 0 | 0 | 0 | 0 |
| Lic_rhom  | 0 | 0 | 0 | 0 | 0 | 0 | 0   | 0 | 0  | 0 | 0 | 0 | 0 | 0 |
| Lun_bise  | 0 | 0 | 1 | 0 | 2 | 2 | 1   | 7 | 4  | 2 | 0 | 0 | 0 | 0 |
| Lut_muti  | 0 | 0 | 0 | 0 | 0 | 0 | 0   | 0 | 0  | 0 | 0 | 0 | 0 | 0 |
| Mar_atom  | 0 | 0 | 2 | 4 | 0 | 0 | 57  | 1 | 3  | 0 | 0 | 0 | 0 | 1 |
| Mar_mart  | 0 | 0 | 1 | 0 | 0 | 0 | 2   | 9 | 21 | 1 | 0 | 0 | 0 | 0 |
| Mar_schu  | 1 | 0 | 6 | 4 | 3 | 1 | 108 | 3 | 0  | 1 | 0 | 0 | 0 | 1 |
| Mas_balt  | 0 | 0 | 0 | 0 | 0 | 0 | 0   | 0 | 0  | 0 | 0 | 0 | 0 | 0 |
| Mas_brau  | 0 | 0 | 0 | 0 | 0 | 0 | 0   | 0 | 0  | 0 | 0 | 0 | 0 | 0 |
| Mas_elli  | 0 | 0 | 0 | 0 | 0 | 0 | 0   | 0 | 0  | 0 | 0 | 0 | 0 | 0 |
| Mas_exig  | 0 | 0 | 0 | 0 | 0 | 0 | 0   | 0 | 0  | 0 | 0 | 0 | 0 | 0 |
| Mas_pumi  | 0 | 0 | 0 | 0 | 0 | 0 | 0   | 0 | 0  | 0 | 0 | 0 | 0 | 0 |
| Mas_pusi  | 0 | 0 | 0 | 0 | 0 | 0 | 0   | 0 | 0  | 0 | 0 | 0 | 0 | 0 |
| Mas_smam  | 0 | 0 | 0 | 0 | 0 | 0 | 2   | 0 | 0  | 0 | 0 | 0 | 0 | 0 |
| Mas_smit  | 0 | 0 | 0 | 0 | 0 | 0 | 2   | 0 | 0  | 0 | 0 | 0 | 0 | 0 |
| Mel_arct  | 0 | 0 | 0 | 0 | 0 | 0 | 0   | 0 | 0  | 0 | 0 | 0 | 0 | 0 |
| Mel_line  | 0 | 0 | 0 | 0 | 0 | 0 | 0   | 0 | 0  | 0 | 0 | 0 | 0 | 0 |
| Mel_moni  | 0 | 0 | 0 | 0 | 0 | 0 | 0   | 0 | 0  | 0 | 0 | 0 | 0 | 0 |
| Mel_numm  | 0 | 0 | 0 | 0 | 0 | 0 | 0   | 0 | 0  | 0 | 0 | 0 | 0 | 0 |
| Mel_vari  | 0 | 0 | 0 | 0 | 0 | 0 | 0   | 0 | 0  | 0 | 0 | 0 | 0 | 0 |
| Nav_aren  | 0 | 0 | 0 | 0 | 0 | 0 | 0   | 0 | 0  | 0 | 0 | 0 | 0 | 0 |
| Nav_bipu  | 0 | 0 | 0 | 0 | 0 | 0 | 0   | 0 | 0  | 0 | 0 | 0 | 0 | 0 |
| Nav_boss  | 0 | 0 | 0 | 0 | 0 | 0 | 0   | 0 | 0  | 0 | 0 | 0 | 0 | 0 |
| Nav_bott  | 3 | 0 | 0 | 0 | 0 | 0 | 0   | 0 | 0  | 0 | 0 | 0 | 0 | 0 |
| Nav_brem  | 0 | 0 | 0 | 0 | 0 | 0 | 0   | 0 | 0  | 0 | 0 | 0 | 0 | 0 |
| Nav_capi  | 0 | 0 | 0 | 0 | 0 | 0 | 0   | 0 | 0  | 0 | 0 | 0 | 0 | 0 |
| Nav_cinc  | 0 | 0 | 0 | 1 | 0 | 0 | 0   | 0 | 0  | 0 | 0 | 0 | 0 | 0 |
| Nav_clem  | 0 | 0 | 0 | 0 | 0 | 0 | 0   | 1 | 0  | 0 | 0 | 0 | 0 | 0 |
| Nav_cryp  | 9 | 4 | 8 | 3 | 2 | 3 | 2   | 2 | 4  | 1 | 1 | 0 | 2 | 0 |
| Nav_digi  | 0 | 0 | 0 | 0 | 0 | 0 | 0   | 0 | 0  | 0 | 0 | 0 | 0 | 0 |
| Nav_duer  | 0 | 0 | 0 | 0 | 0 | 0 | 0   | 0 | 0  | 0 | 0 | 0 | 0 | 0 |
| Nav_eidr  | 0 | 1 | 0 | 0 | 0 | 0 | 0   | 0 | 0  | 0 | 0 | 0 | 0 | 0 |
| Nav_flan  | 0 | 0 | 0 | 0 | 0 | 0 | 0   | 0 | 0  | 0 | 0 | 0 | 0 | 0 |
| Nav_geii  | 0 | 0 | 0 | 0 | 0 | 0 | 0   | 0 | 0  | 0 | 0 | 0 | 0 | 0 |
| Nav_gepo  | 0 | 0 | 0 | 0 | 0 | 0 | 0   | 0 | 0  | 0 | 0 | 0 | 0 | 0 |
| Nav_greg  | 0 | 2 | 2 | 1 | 7 | 0 | 11  | 9 | 10 | 3 | 0 | 0 | 0 | 1 |













|          |    |    |    |    |    |    |    |     |    |    |    |    |
|----------|----|----|----|----|----|----|----|-----|----|----|----|----|
| Cal_amph | 0  | 0  | 0  | 0  | 0  | 0  | 0  | 0   | 0  | 0  | 0  | 0  |
| Cal_baci | 1  | 2  | 0  | 1  | 0  | 1  | 0  | 0   | 0  | 1  | 0  | 0  |
| Cal_cras | 0  | 0  | 0  | 0  | 0  | 0  | 0  | 0   | 0  | 0  | 0  | 0  |
| Cal_sili | 0  | 0  | 0  | 0  | 0  | 1  | 0  | 0   | 0  | 1  | 0  | 0  |
| Cam_clyp | 0  | 0  | 0  | 0  | 0  | 0  | 0  | 0   | 0  | 0  | 0  | 0  |
| Cat_adha | 0  | 0  | 0  | 0  | 0  | 0  | 0  | 0   | 0  | 0  | 0  | 0  |
| Cav_lapi | 0  | 0  | 0  | 0  | 0  | 0  | 0  | 0   | 0  | 0  | 0  | 0  |
| Cav_pseu | 0  | 0  | 0  | 1  | 0  | 0  | 0  | 0   | 0  | 0  | 0  | 0  |
| Cer_clos | 0  | 0  | 0  | 0  | 0  | 0  | 0  | 0   | 0  | 0  | 0  | 0  |
| Chp_clam | 0  | 0  | 0  | 0  | 0  | 0  | 0  | 0   | 0  | 0  | 0  | 0  |
| Chp_marg | 0  | 2  | 0  | 0  | 0  | 2  | 0  | 0   | 0  | 0  | 0  | 0  |
| Coc_cost | 0  | 0  | 0  | 0  | 0  | 0  | 0  | 0   | 0  | 0  | 0  | 0  |
| Coc_neot | 1  | 4  | 5  | 15 | 8  | 10 | 4  | 3   | 0  | 33 | 3  | 0  |
| Coc_pedi | 0  | 0  | 0  | 1  | 0  | 0  | 0  | 0   | 0  | 2  | 0  | 1  |
| Coc_pelt | 0  | 0  | 0  | 0  | 0  | 0  | 0  | 0   | 0  | 0  | 0  | 0  |
| Coc_plac | 5  | 6  | 9  | 3  | 18 | 0  | 0  | 2   | 1  | 15 | 2  | 8  |
| Coc_pleu | 0  | 0  | 0  | 0  | 0  | 0  | 0  | 0   | 0  | 0  | 0  | 0  |
| Coc_plli | 0  | 0  | 0  | 0  | 0  | 0  | 0  | 0   | 0  | 0  | 0  | 0  |
| Coc_pqli | 0  | 0  | 0  | 0  | 0  | 0  | 0  | 0   | 0  | 0  | 0  | 0  |
| Coc_psth | 0  | 0  | 0  | 0  | 0  | 0  | 0  | 0   | 0  | 0  | 0  | 0  |
| Coc_scut | 0  | 0  | 0  | 0  | 0  | 0  | 0  | 0   | 0  | 0  | 0  | 0  |
| Coc_stau | 0  | 0  | 0  | 0  | 0  | 0  | 0  | 0   | 0  | 0  | 0  | 0  |
| Com_pusi | 0  | 0  | 0  | 0  | 0  | 0  | 0  | 0   | 0  | 0  | 0  | 0  |
| Cos_aste | 0  | 0  | 0  | 0  | 0  | 0  | 0  | 0   | 0  | 0  | 0  | 0  |
| Cte_pulc | 3  | 6  | 3  | 9  | 8  | 31 | 3  | 5   | 3  | 0  | 2  | 2  |
| Cyc_atom | 0  | 0  | 0  | 0  | 0  | 0  | 0  | 0   | 0  | 0  | 0  | 0  |
| Cyc_choc | 0  | 0  | 0  | 0  | 0  | 0  | 0  | 0   | 0  | 0  | 0  | 0  |
| Cyc_mene | 0  | 0  | 3  | 0  | 0  | 7  | 0  | 2   | 0  | 0  | 0  | 0  |
| Cyc_radi | 0  | 0  | 0  | 0  | 0  | 0  | 0  | 0   | 0  | 0  | 0  | 0  |
| Cyc_ross | 0  | 0  | 0  | 0  | 0  | 0  | 0  | 0   | 0  | 0  | 0  | 0  |
| Cyc_stel | 0  | 0  | 1  | 0  | 0  | 0  | 0  | 0   | 0  | 0  | 0  | 0  |
| Cyc_stri | 0  | 0  | 0  | 0  | 0  | 0  | 0  | 0   | 0  | 0  | 0  | 0  |
| Cyc_trip | 0  | 0  | 0  | 0  | 0  | 0  | 0  | 0   | 0  | 0  | 0  | 0  |
| Cym_affi | 22 | 19 | 23 | 10 | 12 | 26 | 17 | 20  | 41 | 17 | 12 | 13 |
| Cym_cist | 0  | 1  | 2  | 1  | 0  | 0  | 0  | 0   | 0  | 0  | 1  | 0  |
| Cym_helv | 5  | 4  | 5  | 1  | 0  | 6  | 12 | 30  | 32 | 5  | 12 | 10 |
| Cym_lanc | 0  | 1  | 0  | 1  | 0  | 2  | 0  | 1   | 1  | 2  | 1  | 0  |
| Cym_prox | 0  | 0  | 0  | 1  | 0  | 0  | 0  | 0   | 0  | 0  | 0  | 0  |
| Cyp_sole | 0  | 0  | 0  | 1  | 0  | 0  | 0  | 0   | 0  | 0  | 0  | 0  |
| Cys_dubi | 0  | 0  | 0  | 0  | 0  | 0  | 0  | 0   | 0  | 0  | 0  | 0  |
| Den_tecr | 24 | 27 | 5  | 0  | 8  | 31 | 40 | 140 | 25 | 26 | 17 | 55 |

|          |    |    |     |     |     |     |    |    |    |    |    |    |
|----------|----|----|-----|-----|-----|-----|----|----|----|----|----|----|
| Dia_bott | 0  | 0  | 0   | 0   | 0   | 8   | 0  | 0  | 10 | 0  | 0  | 0  |
| Dia_moni | 89 | 28 | 334 | 215 | 220 | 186 | 24 | 42 | 43 | 96 | 94 | 93 |
| Dia_prob | 0  | 0  | 0   | 0   | 0   | 0   | 0  | 0  | 0  | 0  | 0  | 0  |
| Dia_tenu | 0  | 0  | 0   | 0   | 0   | 0   | 2  | 0  | 0  | 0  | 0  | 0  |
| Dia_vulg | 0  | 0  | 0   | 0   | 0   | 0   | 0  | 0  | 0  | 0  | 0  | 2  |
| Dic_subi | 0  | 0  | 0   | 0   | 0   | 0   | 0  | 0  | 0  | 0  | 0  | 0  |
| Dip_depa | 0  | 0  | 0   | 0   | 0   | 0   | 0  | 0  | 0  | 0  | 0  | 0  |
| Dip_dydi | 0  | 0  | 0   | 0   | 0   | 0   | 0  | 0  | 0  | 0  | 0  | 0  |
| Dip_elli | 0  | 0  | 2   | 3   | 0   | 0   | 0  | 0  | 0  | 0  | 0  | 0  |
| Dip_inte | 0  | 0  | 0   | 0   | 0   | 0   | 0  | 0  | 0  | 0  | 0  | 1  |
| Dip_ocul | 0  | 0  | 0   | 1   | 2   | 0   | 0  | 0  | 0  | 0  | 0  | 0  |
| Dip_smdi | 0  | 0  | 0   | 0   | 0   | 0   | 0  | 0  | 0  | 1  | 0  | 0  |
| Dip_smpu | 1  | 1  | 0   | 2   | 0   | 0   | 0  | 0  | 1  | 0  | 0  | 0  |
| Dip_smrh | 0  | 0  | 0   | 0   | 0   | 0   | 0  | 0  | 0  | 0  | 0  | 0  |
| Dip_subo | 0  | 1  | 0   | 0   | 0   | 0   | 0  | 0  | 0  | 0  | 0  | 0  |
| Enc_caes | 0  | 1  | 2   | 5   | 0   | 2   | 1  | 2  | 0  | 1  | 1  | 10 |
| Enc_lacu | 3  | 27 | 2   | 1   | 2   | 0   | 3  | 2  | 0  | 3  | 1  | 2  |
| Enc_minu | 0  | 1  | 1   | 7   | 12  | 6   | 5  | 2  | 6  | 6  | 31 | 4  |
| Enc_obsc | 0  | 0  | 0   | 0   | 0   | 0   | 0  | 1  | 0  | 0  | 0  | 0  |
| Enc_pros | 2  | 0  | 0   | 1   | 2   | 0   | 0  | 0  | 0  | 0  | 1  | 1  |
| Enc_sile | 18 | 16 | 21  | 47  | 36  | 24  | 12 | 0  | 7  | 8  | 10 | 15 |
| Enc_tenu | 0  | 0  | 0   | 0   | 0   | 0   | 0  | 0  | 0  | 0  | 0  | 0  |
| Enp_behr | 0  | 0  | 0   | 0   | 0   | 0   | 0  | 0  | 0  | 0  | 0  | 0  |
| Enp_kram | 80 | 68 | 21  | 2   | 0   | 9   | 50 | 73 | 55 | 32 | 16 | 22 |
| Ent_palu | 0  | 1  | 2   | 1   | 0   | 0   | 0  | 0  | 0  | 3  | 3  | 0  |
| Ent_pseu | 0  | 0  | 0   | 0   | 0   | 0   | 0  | 0  | 0  | 0  | 0  | 1  |
| Ent_punc | 0  | 0  | 0   | 0   | 0   | 0   | 0  | 0  | 0  | 0  | 0  | 0  |
| Epi_adna | 0  | 0  | 2   | 0   | 6   | 0   | 0  | 0  | 0  | 0  | 0  | 0  |
| Epi_goep | 0  | 0  | 0   | 0   | 0   | 0   | 0  | 0  | 0  | 0  | 0  | 0  |
| Epi_sore | 4  | 14 | 7   | 13  | 2   | 2   | 2  | 2  | 10 | 6  | 2  | 1  |
| Epi_turg | 0  | 0  | 1   | 2   | 4   | 2   | 1  | 0  | 2  | 1  | 0  | 1  |
| Epi_tuwe | 0  | 0  | 0   | 0   | 0   | 0   | 0  | 0  | 0  | 0  | 0  | 0  |
| Euc_laev | 0  | 0  | 2   | 0   | 0   | 1   | 0  | 0  | 0  | 0  | 0  | 0  |
| Eun_arcu | 0  | 0  | 0   | 0   | 0   | 0   | 0  | 0  | 0  | 0  | 0  | 0  |
| Eun_peun | 0  | 0  | 0   | 0   | 0   | 0   | 0  | 0  | 0  | 0  | 0  | 0  |
| Fal_clep | 0  | 1  | 0   | 1   | 0   | 0   | 0  | 0  | 0  | 0  | 0  | 0  |
| Fal_cryp | 0  | 0  | 0   | 0   | 0   | 0   | 0  | 0  | 0  | 0  | 0  | 0  |
| Fal_flor | 0  | 0  | 0   | 1   | 0   | 0   | 0  | 0  | 0  | 0  | 0  | 0  |
| Fal_psny | 0  | 0  | 0   | 0   | 0   | 0   | 0  | 0  | 0  | 0  | 0  | 0  |
| Fal_pygm | 0  | 0  | 2   | 0   | 2   | 0   | 0  | 0  | 0  | 0  | 0  | 0  |
| Fis_sapr | 0  | 0  | 0   | 1   | 0   | 1   | 0  | 0  | 0  | 0  | 0  | 0  |

|          |     |     |     |     |     |     |    |     |     |    |    |    |
|----------|-----|-----|-----|-----|-----|-----|----|-----|-----|----|----|----|
| Fra_amic | 0   | 0   | 0   | 0   | 0   | 0   | 0  | 0   | 0   | 0  | 0  | 0  |
| Fra_capu | 0   | 0   | 0   | 0   | 0   | 0   | 21 | 0   | 0   | 0  | 0  | 0  |
| Fra_caru | 46  | 85  | 42  | 68  | 34  | 128 | 42 | 120 | 127 | 78 | 38 | 39 |
| Fra_cava | 118 | 162 | 175 | 117 | 170 | 53  | 76 | 15  | 37  | 29 | 12 | 37 |
| Fra_cons | 0   | 0   | 0   | 0   | 0   | 0   | 0  | 0   | 0   | 0  | 0  | 0  |
| Fra_geda | 0   | 0   | 0   | 0   | 0   | 0   | 0  | 0   | 0   | 0  | 0  | 0  |
| Fra_grac | 19  | 6   | 11  | 14  | 26  | 10  | 38 | 42  | 39  | 39 | 26 | 9  |
| Fra_hydu | 0   | 0   | 0   | 0   | 0   | 0   | 0  | 0   | 0   | 0  | 0  | 0  |
| Fra_lept | 0   | 0   | 0   | 0   | 0   | 0   | 0  | 0   | 0   | 0  | 1  | 0  |
| Fra_nitz | 0   | 0   | 0   | 0   | 0   | 0   | 0  | 0   | 0   | 0  | 0  | 0  |
| Frp_cyli | 0   | 0   | 0   | 0   | 0   | 0   | 0  | 0   | 0   | 0  | 0  | 1  |
| Fru_vulg | 0   | 0   | 0   | 0   | 0   | 0   | 0  | 0   | 0   | 0  | 0  | 0  |
| Gom_clav | 0   | 1   | 0   | 0   | 0   | 1   | 0  | 3   | 2   | 2  | 0  | 6  |
| Gom_intr | 6   | 2   | 0   | 1   | 8   | 9   | 29 | 5   | 3   | 0  | 1  | 0  |
| Gom_oliv | 3   | 12  | 27  | 1   | 0   | 4   | 7  | 0   | 8   | 2  | 12 | 3  |
| Gom_parv | 0   | 0   | 1   | 1   | 4   | 0   | 0  | 0   | 0   | 0  | 0  | 8  |
| Gon_exig | 0   | 0   | 0   | 0   | 0   | 0   | 0  | 0   | 0   | 0  | 0  | 0  |
| Gos_expl | 0   | 0   | 0   | 0   | 0   | 0   | 0  | 0   | 0   | 0  | 0  | 0  |
| Gos_obsc | 0   | 0   | 0   | 0   | 0   | 0   | 0  | 0   | 0   | 1  | 0  | 0  |
| Gra_mari | 0   | 0   | 0   | 0   | 0   | 0   | 0  | 0   | 0   | 0  | 0  | 0  |
| Gra_ocea | 0   | 0   | 0   | 0   | 0   | 0   | 0  | 0   | 0   | 0  | 0  | 0  |
| Gyr_acum | 0   | 0   | 0   | 0   | 0   | 0   | 0  | 0   | 0   | 0  | 0  | 0  |
| Gyr_atte | 0   | 0   | 0   | 2   | 0   | 0   | 0  | 0   | 0   | 0  | 0  | 0  |
| Gyr_stri | 0   | 0   | 0   | 0   | 0   | 0   | 0  | 0   | 0   | 0  | 0  | 0  |
| Gyr_tenu | 0   | 0   | 0   | 0   | 0   | 0   | 0  | 0   | 0   | 0  | 0  | 0  |
| Hal_coff | 5   | 1   | 1   | 5   | 6   | 1   | 9  | 10  | 5   | 10 | 48 | 5  |
| Hal_exig | 0   | 0   | 0   | 0   | 0   | 0   | 0  | 0   | 0   | 0  | 0  | 0  |
| Hal_hols | 0   | 0   | 0   | 0   | 0   | 0   | 0  | 0   | 0   | 0  | 0  | 0  |
| Hal_hybr | 0   | 0   | 0   | 1   | 0   | 0   | 0  | 0   | 0   | 0  | 0  | 0  |
| Hal_luci | 0   | 0   | 0   | 0   | 0   | 0   | 0  | 2   | 3   | 0  | 0  | 0  |
| Hal_norm | 0   | 0   | 0   | 0   | 4   | 0   | 0  | 0   | 0   | 0  | 0  | 0  |
| Hal_subh | 0   | 0   | 0   | 0   | 0   | 0   | 0  | 0   | 0   | 0  | 0  | 0  |
| Hal_tene | 0   | 0   | 3   | 0   | 0   | 0   | 0  | 0   | 0   | 0  | 0  | 0  |
| Hal_vene | 13  | 31  | 3   | 8   | 0   | 0   | 5  | 2   | 3   | 10 | 3  | 1  |
| Han_balt | 0   | 0   | 0   | 0   | 2   | 0   | 0  | 0   | 0   | 0  | 0  | 0  |
| Has_spic | 0   | 1   | 0   | 0   | 2   | 0   | 0  | 0   | 0   | 2  | 0  | 0  |
| Hip_capi | 0   | 0   | 0   | 15  | 14  | 0   | 0  | 0   | 0   | 0  | 0  | 0  |
| Hip_hung | 1   | 0   | 0   | 1   | 4   | 1   | 0  | 0   | 0   | 0  | 1  | 0  |
| Hip_lesm | 0   | 0   | 0   | 1   | 0   | 0   | 0  | 0   | 0   | 0  | 0  | 2  |
| Kar_amoe | 0   | 0   | 0   | 0   | 0   | 0   | 0  | 0   | 0   | 0  | 0  | 0  |
| Kar_clev | 1   | 2   | 1   | 2   | 0   | 6   | 4  | 0   | 0   | 7  | 1  | 0  |

|           |    |   |    |    |    |    |    |    |    |    |    |    |
|-----------|----|---|----|----|----|----|----|----|----|----|----|----|
| Kar_niti  | 0  | 0 | 0  | 0  | 0  | 1  | 0  | 0  | 0  | 0  | 0  | 0  |
| Kar_subm  | 0  | 0 | 0  | 0  | 0  | 0  | 0  | 0  | 0  | 0  | 0  | 0  |
| Lemn_hung | 0  | 0 | 1  | 0  | 0  | 0  | 0  | 0  | 0  | 0  | 0  | 0  |
| Lic_debi  | 0  | 0 | 0  | 0  | 0  | 0  | 0  | 0  | 0  | 0  | 0  | 0  |
| Lic_gran  | 0  | 0 | 0  | 0  | 0  | 0  | 0  | 0  | 0  | 0  | 0  | 0  |
| Lic_oedi  | 0  | 0 | 0  | 0  | 0  | 0  | 0  | 0  | 0  | 0  | 0  | 0  |
| Lic_rhom  | 0  | 0 | 0  | 0  | 0  | 0  | 0  | 0  | 0  | 0  | 0  | 0  |
| Lun_bise  | 3  | 0 | 1  | 0  | 0  | 2  | 2  | 2  | 0  | 5  | 0  | 1  |
| Lut_muti  | 0  | 0 | 0  | 0  | 0  | 0  | 0  | 0  | 0  | 0  | 0  | 0  |
| Mar_atom  | 12 | 6 | 12 | 18 | 18 | 19 | 0  | 0  | 1  | 13 | 1  | 15 |
| Mar_mart  | 3  | 1 | 2  | 3  | 6  | 3  | 0  | 0  | 0  | 3  | 0  | 1  |
| Mar_schu  | 5  | 5 | 6  | 22 | 20 | 9  | 0  | 1  | 3  | 26 | 7  | 25 |
| Mas_balt  | 0  | 0 | 0  | 0  | 0  | 0  | 0  | 0  | 0  | 0  | 0  | 0  |
| Mas_brau  | 0  | 0 | 0  | 0  | 0  | 0  | 0  | 0  | 0  | 0  | 0  | 0  |
| Mas_elli  | 0  | 0 | 0  | 2  | 0  | 0  | 0  | 0  | 0  | 0  | 0  | 0  |
| Mas_exig  | 0  | 0 | 0  | 0  | 0  | 0  | 0  | 0  | 0  | 0  | 0  | 0  |
| Mas_pumi  | 0  | 0 | 0  | 0  | 0  | 0  | 0  | 0  | 0  | 0  | 0  | 0  |
| Mas_pusi  | 0  | 0 | 0  | 0  | 0  | 0  | 0  | 0  | 0  | 0  | 0  | 0  |
| Mas_smam  | 8  | 1 | 2  | 6  | 6  | 3  | 1  | 0  | 2  | 3  | 6  | 2  |
| Mas_smit  | 10 | 1 | 5  | 13 | 24 | 2  | 5  | 2  | 2  | 2  | 2  | 0  |
| Mel_arct  | 0  | 0 | 0  | 0  | 0  | 0  | 0  | 0  | 0  | 0  | 0  | 0  |
| Mel_line  | 0  | 1 | 3  | 1  | 2  | 1  | 1  | 0  | 0  | 0  | 0  | 2  |
| Mel_moni  | 0  | 0 | 0  | 0  | 0  | 0  | 0  | 0  | 0  | 0  | 0  | 0  |
| Mel_numm  | 0  | 0 | 0  | 0  | 0  | 0  | 0  | 0  | 0  | 0  | 0  | 0  |
| Mel_vari  | 0  | 0 | 0  | 1  | 0  | 0  | 0  | 0  | 0  | 0  | 0  | 0  |
| Nav_aren  | 0  | 0 | 0  | 0  | 0  | 0  | 0  | 0  | 0  | 0  | 0  | 0  |
| Nav_bipu  | 0  | 0 | 0  | 0  | 0  | 0  | 0  | 0  | 0  | 0  | 0  | 0  |
| Nav_boss  | 0  | 0 | 0  | 0  | 0  | 0  | 0  | 0  | 0  | 0  | 0  | 0  |
| Nav_bott  | 0  | 0 | 0  | 0  | 0  | 1  | 0  | 0  | 0  | 0  | 1  | 0  |
| Nav_brem  | 0  | 0 | 1  | 0  | 0  | 0  | 0  | 0  | 0  | 0  | 0  | 0  |
| Nav_capi  | 0  | 0 | 0  | 9  | 4  | 0  | 0  | 0  | 0  | 0  | 1  | 0  |
| Nav_cinc  | 0  | 0 | 0  | 0  | 0  | 0  | 0  | 0  | 0  | 0  | 0  | 0  |
| Nav_clem  | 0  | 1 | 0  | 0  | 0  | 0  | 0  | 0  | 0  | 0  | 0  | 0  |
| Nav_cryp  | 13 | 9 | 3  | 14 | 12 | 13 | 32 | 34 | 26 | 31 | 19 | 3  |
| Nav_digi  | 0  | 0 | 0  | 0  | 0  | 0  | 0  | 0  | 0  | 1  | 0  | 0  |
| Nav_duer  | 0  | 0 | 0  | 0  | 0  | 0  | 0  | 0  | 0  | 1  | 0  | 0  |
| Nav_eidr  | 0  | 0 | 0  | 0  | 0  | 0  | 0  | 0  | 0  | 0  | 0  | 0  |
| Nav_flan  | 0  | 0 | 0  | 0  | 0  | 0  | 0  | 0  | 0  | 0  | 0  | 0  |
| Nav_geii  | 0  | 0 | 0  | 0  | 0  | 0  | 0  | 0  | 0  | 0  | 0  | 0  |
| Nav_gepo  | 1  | 0 | 0  | 0  | 0  | 0  | 0  | 0  | 0  | 0  | 0  | 0  |
| Nav_greg  | 12 | 8 | 10 | 5  | 2  | 9  | 0  | 0  | 0  | 0  | 1  | 2  |
