# Supplementary material for: Diatom Cell Size, Coloniality and Motility: Trade-Offs between Temperature, Salinity and Nutrient Supply with Climate Change
Source: PubMed Central journal article supplement (PMC4184900; doi:10.1371/journal.pone.0109993), 2014-10-03
Supplement: pone.0109993.s005.pdf [file pone.0109993.s005.pdf]

Table S5. Ordinal scales used to estimate the magnitude of some environmental and biotic variables in the temperature and salinity gradients.

| Temperature gradient                                                                                                                                                                             |                                                                                                                                                                                                                           | Salinity gradient                                                                                                                      |                                                                                                                                                                                                                                                 |
|--------------------------------------------------------------------------------------------------------------------------------------------------------------------------------------------------|---------------------------------------------------------------------------------------------------------------------------------------------------------------------------------------------------------------------------|----------------------------------------------------------------------------------------------------------------------------------------|-------------------------------------------------------------------------------------------------------------------------------------------------------------------------------------------------------------------------------------------------|
| FLOW                                                                                                                                                                                             | MACCOV                                                                                                                                                                                                                    | EXP                                                                                                                                    | BEACH                                                                                                                                                                                                                                           |
| Water movement flow factor                                                                                                                                                                       | Macroalgal cover on the stones                                                                                                                                                                                            | Exposure to wave action                                                                                                                | Type of substratum of the terrestrial part of the beach (not covered by water)                                                                                                                                                                  |
| <p>1 = Stagnant water</p> <p>2 = Quiescent water</p> <p>3 = Exposed to natural waves</p> <p>4 = Slow unidirectional flow</p> <p>5 = Unidirectional flow</p> <p>6 = Rapid unidirectional flow</p> | <p>1 = &lt; 1%, 1-5 individuals</p> <p>2 = &lt; 1%, 6-10 individuals</p> <p>3 = &lt; 1%, &gt;10 individuals</p> <p>4 = 1-5%</p> <p>5 = 6-10%</p> <p>6 = 11-25%</p> <p>7 = 26-50%</p> <p>8 = 51-75%</p> <p>9 = 76-100%</p> | <p>1 = Stagnant water</p> <p>2 = Very little exposed</p> <p>3 = Little exposed</p> <p>4 = Medium exposed</p> <p>5 = Highly exposed</p> | <p>1 = &gt;90% sand</p> <p>2 = &gt;25% sand and &gt;25% stones</p> <p>3 = &gt;90% stones of &lt;50 cm in size</p> <p>4 = &gt;90% stones of &gt;50 cm in size</p> <p>5 = &gt;25% stones and &gt;25% solid rock</p> <p>6 = &gt;90% solid rock</p> |
