# Supplementary material for: Diatom Cell Size, Coloniality and Motility: Trade-Offs between Temperature, Salinity and Nutrient Supply with Climate Change
Source: PubMed Central journal article supplement (PMC4184900; doi:10.1371/journal.pone.0109993), 2014-10-03
Supplement: pone.0109993.s006.pdf [file pone.0109993.s006.pdf]

Table S6. List of the 405 diatom taxa included in the analyses. BMB nr = number under which photomicrographs and ecological information can be found in publications 39-43. Temp = temperature gradient data set, Salin = Salinity gradient data set, Freq = average frequency in 1000 valves, Abund = average abundance in 1000 valves, Salinity group = distribution in the Baltic Sea area (M = marine, B = brackish, F = freshwater), Euryhal group = Euryhalinity according to the species' salinity range in the Baltic Sea area after [39-43] (M = medium, L = large, XL = very large, XXL = extremely large). For further definitions of traits, see "Assignment of traits to the diatom taxa" in the "Materials and Methods" section.

| Diatom taxon                                                                 | BMB nr | Temp<br>Freq | Temp<br>Abund | Salin<br>Freq | Salin<br>Abund | Salinity<br>group | Euryhal<br>group | Life<br>form      | Motility | Colony<br>form | Attachm<br>type | Colony<br>height | Length<br>µm | Surface<br>µm <sup>2</sup> | Volume<br>µm <sup>3</sup> | S:V<br>ratio | Shape |
|------------------------------------------------------------------------------|--------|--------------|---------------|---------------|----------------|-------------------|------------------|-------------------|----------|----------------|-----------------|------------------|--------------|----------------------------|---------------------------|--------------|-------|
| <i>Achnanthes bicapitata</i> Hustedt                                         | -      | 1            | 0.02          | -             | -              | MB                | M                | Attached solitary | Creeping | None           | Adnate          | Low              | 10           | 116                        | 62                        | 1.87         | 2.6   |
| <i>Achnanthes brevipes</i> C.A. Agardh                                       | 101    | 21           | 0.32          | 2             | 0.076          | BM                | L                | Attached colony   | Attached | Ribbon         | Short stalk     | High             | 51           | 3495                       | 12898                     | 0.27         | 2.7   |
| <i>Achnanthes brevipes</i> var. <i>intermedia</i> (Kützing) Cleve            | 2      | 46           | 4.95          | 6             | 0.134          | MB                | L                | Attached colony   | Attached | Ribbon         | Short stalk     | High             | 36           | 1875                       | 5290                      | 0.35         | 2.6   |
| <i>Achnanthes fogedii</i> Håkansson                                          | 302    | -            | -             | 5             | 0.084          | FB                | M                | Attached solitary | Creeping | None           | Adnate          | Low              | 8            | 110                        | 95                        | 1.16         | 1.7   |
| <i>Achnanthes leonardii</i> Witkowski & Lange-Bertalot                       | -      | -            | -             | 1             | 0.176          | MB                | M                | Attached solitary | Creeping | None           | Adnate          | Low              | 10           | 116                        | 62                        | 1.87         | 2.6   |
| <i>Achnanthes longipes</i> C.A. Agardh                                       | 4      | 1            | 0.01          | 1             | 0.017          | B                 | XL               | Attached colony   | Attached | Ribbon         | Short stalk     | High             | 77           | 7638                       | 41618                     | 0.18         | 2.9   |
| <i>Achnanthes lutheri</i> Hustedt                                            | -      | -            | -             | 1             | 0.008          | FB                | M                | Attached solitary | Creeping | None           | Adnate          | Low              | 9            | 117                        | 96                        | 1.23         | 2.0   |
| <i>Achnanthes minuscula</i> Hustedt                                          | 307    | 77           | 3.25          | 29            | 1.084          | FB                | XXL              | Attached solitary | Creeping | None           | Adnate          | Low              | 9            | 86                         | 44                        | 1.95         | 2.3   |
| <i>Achnanthes vistulana</i> Witkowski                                        | 405    | 11           | 0.14          | 16            | 0.639          | B                 | M                | Attached colony   | Attached | Ribbon         | Short stalk     | High             | 9            | 67                         | 26                        | 2.58         | 3.7   |
| <i>Achnantheidium exile</i> (Kützing) Heiberg                                | -      | -            | -             | 2             | 0.025          | B                 | M                | Attached colony   | Attached | Ribbon         | Short stalk     | High             | 13           | 123                        | 72                        | 1.70         | 4.0   |
| <i>Achnantheidium minutissimum</i> (Kützing) Czarnecki                       | 406    | 83           | 4.54          | 81            | 64.504         | FBM               | XXL              | Attached colony   | Attached | Ribbon         | Short stalk     | High             | 15           | 141                        | 77                        | 1.83         | 5.4   |
| <i>Achnantheidium pyrenaicum</i> (Hustedt) Kobayasi                          | -      | 10           | 0.14          | 1             | 0.017          | MB                | XL               | Attached colony   | Attached | Ribbon         | Short stalk     | High             | 13           | 123                        | 72                        | 1.70         | 4.0   |
| <i>Achnantheidium subatomoides</i> (Hustedt) Monnier, Lange-Bertalot & Ector | -      | 5            | 0.08          | -             | -              | BF                | L                | Attached solitary | Creeping | None           | Adnate          | Low              | 8            | 110                        | 92                        | 1.20         | 1.8   |
| <i>Actinocyclus normanii</i> fo. <i>subsalsus</i> (Juhlin-Dannfelt) Hustedt  | 106    | -            | -             | 1             | 0.008          | FB                | L                | Floating solitary | Floating | None           | None            | Low              | 26           | 2123                       | 6899                      | 0.31         | 1.0   |
| <i>Actinocyclus octonarius</i> var. <i>crassus</i> (W. Smith) Hendey         | 206    | 3            | 0.03          | 1             | 0.025          | BF                | XL               | Floating solitary | Floating | None           | None            | Low              | 31           | 3018                       | 11693                     | 0.26         | 1.0   |
| <i>Amicula speculum</i> (Witkowski) Witkowski                                | -      | -            | -             | 1             | 0.050          | BM                | L                | Motile solitary   | Motile   | None           | None            | Low              | 12           | 126                        | 74                        | 1.70         | 3.8   |
| <i>Amphora commutata</i> Grunow                                              | 107    | 2            | 0.02          | -             | -              | B                 | L                | Motile solitary   | Motile   | None           | None            | Low              | 57           | 3260                       | 10115                     | 0.32         | 2.2   |
| <i>Amphora copulata</i> (Kützing) Schoeman & Archibald                       | 7      | 18           | 0.28          | 48            | 0.840          | FB                | XL               | Motile solitary   | Motile   | None           | None            | Low              | 30           | 1170                       | 2498                      | 0.47         | 1.7   |
| <i>Amphora flebilis</i> Simonsen                                             | -      | 103          | 8.16          | 24            | 0.782          | B                 | L                | Motile solitary   | Motile   | None           | None            | Low              | 15           | 155                        | 87                        | 1.78         | 3.2   |
| <i>Amphora helenensis</i> Giffen                                             | 409    | -            | -             | 5             | 0.445          | MB                | L                | Motile solitary   | Motile   | None           | None            | Low              | 10           | 132                        | 95                        | 1.40         | 1.7   |
| <i>Amphora inariensis</i> Krammer                                            | -      | 6            | 0.08          | 8             | 0.496          | FB                | L                | Motile solitary   | Motile   | None           | None            | Low              | 16           | 376                        | 420                       | 0.90         | 1.6   |
| <i>Amphora lineolata</i> Ehrenberg                                           | 108    | 9            | 0.14          | 20            | 0.437          | B                 | XL               | Motile solitary   | Motile   | None           | None            | Low              | 44           | 1631                       | 3308                      | 0.49         | 2.6   |
| <i>Amphora micrometra</i> Giffen                                             | 214    | 2            | 0.05          | 5             | 0.126          | BM                | XL               | Motile solitary   | Motile   | None           | None            | Low              | 8            | 93                         | 57                        | 1.64         | 1.6   |
| <i>Amphora ovalis</i> (Kützing) Kützing                                      | 9      | 3            | 0.06          | 4             | 0.076          | FB                | XL               | Motile solitary   | Motile   | None           | None            | Low              | 49           | 3323                       | 12172                     | 0.27         | 1.6   |
| <i>Amphora pediculus</i> (Kützing) Grunow                                    | 10     | 110          | 6.13          | 88            | 8.639          | FB                | XXL              | Motile solitary   | Motile   | None           | None            | Low              | 11           | 147                        | 110                       | 1.33         | 1.7   |
| <i>Amphora profusa</i> Giffen                                                | -      | -            | -             | 2             | 0.050          | MB                | L                | Motile solitary   | Motile   | None           | None            | Low              | 29           | 589                        | 639                       | 0.92         | 3.2   |
| <i>Amphora staurophora</i> Juhlin-Dannfelt                                   | 318    | 1            | 0.02          | -             | -              | BM                | XL               | Motile solitary   | Motile   | None           | None            | Low              | 16           | 233                        | 189                       | 1.23         | 2.3   |
| <i>Aneumastus minor</i> (Hustedt) Lange-Bertalot                             | 217    | -            | -             | 14            | 0.168          | FB                | L                | Motile solitary   | Motile   | None           | None            | Low              | 19           | 573                        | 890                       | 0.64         | 2.1   |
| <i>Aneumastus tuscula</i> (Ehrenberg) D.G. Mann & Stickle                    | 319    | 3            | 0.02          | 4             | 0.042          | FB                | M                | Motile solitary   | Motile   | None           | None            | Low              | 37           | 1820                       | 4662                      | 0.39         | 2.5   |
| <i>Anomoeoneis sphaerophora</i> var. <i>sculpta</i> (Ehrenberg) O. Müller    | 110    | -            | -             | 1             | 0.017          | FB                | L                | Motile solitary   | Motile   | None           | None            | Low              | 115          | 12800                      | 73959                     | 0.17         | 3.3   |

|                                                                                 |     |     |       |    |        |     |     |                   |          |        |        |        |     |       |         |      |      |
|---------------------------------------------------------------------------------|-----|-----|-------|----|--------|-----|-----|-------------------|----------|--------|--------|--------|-----|-------|---------|------|------|
| <i>Astartiella bahusiensis</i> (Grunow) Witkowski, Lange-Bertalot & Metzeltin   | 201 | 11  | 0.19  | 2  | 0.084  | FB  | L   | Attached solitary | Creeping | None   | Adnate | Low    | 19  | 310   | 280     | 1.11 | 3.1  |
| <i>Asterionella formosa</i> Hassall                                             | 11  | 2   | 0.02  | 2  | 0.017  | FB  | M   | Floating colony   | Floating | Zigzag | None   | Medium | 63  | 542   | 265     | 2.05 | 31.5 |
| <i>Aulacoseira</i> Thwaites spp.                                                | 113 | 17  | 0.32  | 9  | 0.134  | FB  | L   | Floating colony   | Floating | Chain  | None   | Medium | 21  | 1342  | 3709    | 0.36 | 1.4  |
| <i>Bacillaria paxillifer</i> (O.F. Müller) Marsson                              | 12  | 75  | 17.78 | 5  | 0.084  | FBM | XXL | Motile colony     | Motile   | Ribbon | None   | Medium | 91  | 2020  | 2801    | 0.72 | 15.2 |
| <i>Berkeleya fennica</i> Juhlin-Dannfelt                                        | 418 | -   | -     | 69 | 8.151  | B   | XL  | Attached colony   | Motile   | Tube   | Tube   | High   | 18  | 197   | 123     | 1.60 | 5.2  |
| <i>Berkeleya rutilans</i> (Trentepohl) Grunow                                   | 13  | 116 | 46.16 | 70 | 22.395 | B   | XXL | Attached colony   | Motile   | Tube   | Tube   | High   | 24  | 412   | 400     | 1.03 | 5.0  |
| <i>Berkeleya scopulorum</i> (Brébisson) Cox                                     | -   | -   | -     | 1  | 0.118  | MB  | L   | Attached colony   | Motile   | Tube   | Tube   | High   | 110 | 3509  | 6988    | 0.50 | 10.0 |
| <i>Biremis lucens</i> (Hustedt) Sabbe, Witkowski & Vijverman                    | 324 | -   | -     | 2  | 0.034  | MB  | L   | Attached colony   | Attached | Ribbon | Pad    | Low    | 17  | 257   | 220     | 1.17 | 4.4  |
| <i>Brachysira aponina</i> Kützing                                               | 14  | 13  | 1.54  | 19 | 0.689  | B   | L   | Attached solitary | Attached | None   | Pad    | Medium | 26  | 413   | 335     | 1.23 | 5.2  |
| <i>Brachysira vitrea</i> (Grunow) Ross                                          | 419 | -   | -     | 24 | 3.092  | FB  | L   | Attached solitary | Attached | None   | Pad    | Medium | 23  | 390   | 341     | 1.14 | 4.2  |
| <i>Brebissonia lanceolata</i> (C.A. Agardh) Mahoney & Reimer                    | 15  | 32  | 1.35  | 9  | 0.134  | FB  | XL  | Attached colony   | Attached | Bush   | Stalk  | High   | 97  | 6454  | 21773   | 0.30 | 4.9  |
| <i>Caloneis aemula</i> (A. Schmidt) Cleve                                       | 420 | -   | -     | 1  | 0.008  | FB  | L   | Motile solitary   | Motile   | None   | None   | Low    | 30  | 726   | 999     | 0.73 | 4.4  |
| <i>Caloneis amphisbaena</i> (Bory) Cleve                                        | 219 | -   | -     | 1  | 0.008  | FB  | XL  | Motile solitary   | Motile   | None   | None   | Low    | 75  | 6900  | 28172   | 0.24 | 2.7  |
| <i>Caloneis bacillum</i> (Grunow) Cleve                                         | 421 | 40  | 0.82  | 15 | 0.202  | FB  | L   | Motile solitary   | Motile   | None   | None   | Low    | 17  | 273   | 247     | 1.11 | 3.1  |
| <i>Caloneis crassa</i> (Gregory) Ross                                           | 325 | -   | -     | 2  | 0.025  | MB  | L   | Motile solitary   | Motile   | None   | None   | Low    | 65  | 5756  | 26536   | 0.22 | 2.4  |
| <i>Caloneis silicula</i> (Ehrenberg) Cleve                                      | -   | -   | -     | 3  | 0.025  | FB  | M   | Motile solitary   | Motile   | None   | None   | Low    | 36  | 626   | 680     | 0.92 | 6.0  |
| <i>Campylodiscus clypeus</i> (Ehrenberg) Ehrenberg                              | 17  | -   | -     | 3  | 0.025  | FBM | XXL | Motile solitary   | Motile   | None   | None   | Low    | 143 | 44170 | 263179  | 0.17 | 1.0  |
| <i>Catenula adhaerens</i> (Mereschkowsky) Mereschkowsky                         | 19  | -   | -     | 6  | 0.118  | BM  | XL  | Attached colony   | Attached | Ribbon | Pad    | Low    | 14  | 94    | 36      | 2.63 | 6.4  |
| <i>Cavinula lapidosa</i> (Krasske) Lange-Bertalot                               | -   | -   | -     | 1  | 0.034  | FB  | M   | Motile solitary   | Motile   | None   | None   | Low    | 16  | 396   | 501     | 0.79 | 2.0  |
| <i>Cavinula pseudoscutiformis</i> (Hustedt) D.G. Mann & Stickle                 | 220 | -   | -     | 1  | 0.008  | FB  | L   | Motile solitary   | Motile   | None   | None   | Low    | 14  | 481   | 753     | 0.64 | 1.3  |
| <i>Ceratoneis closterium</i> Ehrenberg                                          | 33  | 72  | 4.86  | 2  | 0.092  | MB  | XXL | Motile solitary   | Motile   | None   | None   | Low    | 50  | 423   | 158     | 2.68 | 18.0 |
| <i>Chaetoceros</i> Ehrenberg spp.                                               | 22  | 100 | 9.48  | -  | -      | MB  | XXL | Floating colony   | Floating | Chain  | None   | Medium | 12  | 390   | 574     | 0.68 | 1.4  |
| <i>Chamaepinnularia clamans</i> (Hustedt) Witkowski, Lange-Bertalot & Metzeltin | 251 | -   | -     | 1  | 0.017  | MB  | M   | Motile solitary   | Motile   | None   | None   | Low    | 13  | 307   | 342     | 0.90 | 2.2  |
| <i>Chamaepinnularia margaritana</i> (Witkowski) Witkowski                       | 362 | 54  | 1.44  | 22 | 0.261  | B   | L   | Motile solitary   | Motile   | None   | None   | Low    | 7   | 63    | 29      | 2.16 | 2.6  |
| <i>Cocconeis costata</i> Gregory                                                | 334 | -   | -     | 6  | 0.235  | FB  | M   | Attached solitary | Creeping | None   | Adnate | Low    | 17  | 358   | 306     | 1.17 | 1.8  |
| <i>Cocconeis neodiminuta</i> Krammer                                            | -   | 93  | 2.88  | -  | -      | FB  | XXL | Attached solitary | Creeping | None   | Adnate | Low    | 9   | 121   | 65      | 1.86 | 1.5  |
| <i>Cocconeis neothumensis</i> Krammer                                           | 425 | 38  | 1.06  | 62 | 3.437  | FB  | XL  | Attached solitary | Creeping | None   | Adnate | Low    | 10  | 96    | 41      | 2.34 | 2.0  |
| <i>Cocconeis pediculus</i> Ehrenberg                                            | 23  | 97  | 8.05  | 85 | 5.042  | MB  | L   | Attached solitary | Creeping | None   | Adnate | Low    | 26  | 1140  | 1722    | 0.66 | 1.3  |
| <i>Cocconeis peltoides</i> Hustedt                                              | 119 | 8   | 0.09  | 2  | 0.034  | FBM | XXL | Attached solitary | Creeping | None   | Adnate | Low    | 13  | 255   | 196     | 1.30 | 1.5  |
| <i>Cocconeis placentula</i> Ehrenberg                                           | 24  | 113 | 8.17  | 81 | 3.303  | FB  | XXL | Attached solitary | Creeping | None   | Adnate | Low    | 20  | 471   | 465     | 1.01 | 1.8  |
| <i>Cocconeis placentula</i> var. <i>euglypta</i> (Ehrenberg) Grunow             | 426 | -   | -     | 19 | 1.185  | FB  | M   | Attached solitary | Creeping | None   | Adnate | Low    | 15  | 300   | 242     | 1.24 | 1.7  |
| <i>Cocconeis placentula</i> var. <i>lineata</i> (Ehrenberg) van Heurck          | -   | -   | -     | 2  | 0.034  | FB  | L   | Attached solitary | Creeping | None   | Adnate | Low    | 20  | 471   | 465     | 1.01 | 1.8  |
| <i>Cocconeis pseudolineata</i> (Geitler) Lange-Bertalot                         | -   | -   | -     | 3  | 0.034  | FB  | M   | Attached solitary | Creeping | None   | Adnate | Low    | 9   | 121   | 65      | 1.86 | 1.5  |
| <i>Cocconeis pseudothumensis</i> Reichardt                                      | -   | 21  | 0.26  | 1  | 0.008  | MB  | XL  | Attached solitary | Creeping | None   | Adnate | Low    | 9   | 121   | 65      | 1.86 | 1.5  |
| <i>Cocconeis scutellum</i> Ehrenberg                                            | 25  | 25  | 0.40  | 20 | 4.395  | MB  | L   | Attached solitary | Creeping | None   | Adnate | Low    | 18  | 499   | 537     | 0.93 | 1.5  |
| <i>Cocconeis stauroneiformis</i> (W. Smith) Okuno                               | 27  | -   | -     | 10 | 1.992  | B   | XXL | Attached solitary | Creeping | None   | Adnate | Low    | 19  | 481   | 496     | 0.97 | 1.6  |
| <i>Conticribra guillardii</i> (Hasle) Stachura-Suchoples & Williams             | 96  | 8   | 0.15  | -  | -      | MB  | L   | Floating colony   | Floating | Chain  | None   | Medium | 9   | 249   | 277     | 0.90 | 1.0  |
| <i>Conticribra weissflogii</i> (Grunow) Stachura-Suchoples & Williams           | 398 | 1   | 0.01  | -  | -      | MB  | M   | Floating colony   | Floating | Chain  | None   | Medium | 15  | 688   | 1272    | 0.54 | 1.0  |
| <i>Coscinodiscus asteromphalus</i> Ehrenberg                                    | 223 | -   | -     | 1  | 0.017  | FBM | XXL | Floating solitary | Floating | None   | None   | Low    | 174 | 95067 | 2067699 | 0.05 | 1.0  |
| <i>Cosmioneis pusilla</i> (W. Smith) D.G. Mann & Stickle                        | 225 | -   | -     | 1  | 0.008  | B   | L   | Motile solitary   | Motile   | None   | None   | Low    | 39  | 2391  | 7045    | 0.34 | 2.0  |

|                                                                    |     |     |       |     |         |     |     |                   |          |        |       |        |     |       |       |      |      |
|--------------------------------------------------------------------|-----|-----|-------|-----|---------|-----|-----|-------------------|----------|--------|-------|--------|-----|-------|-------|------|------|
| <i>Craticula cuspidata</i> (Kützing) D.G. Mann                     | 428 | 2   | 0.02  | -   | -       | FB  | M   | Motile solitary   | Motile   | None   | None  | Low    | 110 | 8375  | 36086 | 0.23 | 4.1  |
| <i>Ctenophora pulchella</i> (Raifs) Williams & Round               | 29  | 77  | 4.02  | 95  | 14.437  | FB  | XL  | Attached colony   | Attached | Bush   | Pad   | Medium | 97  | 2476  | 3535  | 0.70 | 13.7 |
| <i>Cyclostephanos dubius</i> (Fricke) Round                        | 30  | -   | -     | 4   | 0.067   | FB  | M   | Floating solitary | Floating | None   | None  | Low    | 12  | 445   | 661   | 0.67 | 1.0  |
| <i>Cyclotella atomus</i> Hustedt                                   | 226 | 14  | 0.22  | 4   | 0.151   | FB  | L   | Floating solitary | Floating | None   | None  | Low    | 5   | 92    | 62    | 1.48 | 1.0  |
| <i>Cyclotella choctawhatcheeana</i> Prasad                         | 31  | 82  | 3.40  | 11  | 0.378   | MB  | XL  | Floating colony   | Floating | Chain  | None  | Medium | 6   | 109   | 81    | 1.36 | 1.0  |
| <i>Cyclotella meneghiniana</i> Kützing                             | 32  | 8   | 0.08  | 9   | 0.193   | FB  | XL  | Floating solitary | Floating | None   | None  | Low    | 20  | 1243  | 3093  | 0.40 | 1.0  |
| <i>Cyclotella radiosa</i> (Grunow) Lemmermann                      | 227 | 3   | 0.03  | 4   | 0.059   | FB  | L   | Floating solitary | Floating | None   | None  | Low    | 20  | 1256  | 3140  | 0.40 | 1.0  |
| <i>Cyclotella rossii</i> Håkansson                                 | -   | -   | -     | 5   | 0.092   | FB  | L   | Floating solitary | Floating | None   | None  | Low    | 11  | 612   | 1047  | 0.58 | 1.0  |
| <i>Cyclotella stelligera</i> Cleve & Grunow                        | 337 | 5   | 0.06  | 2   | 0.017   | FB  | M   | Floating solitary | Floating | None   | None  | Low    | 9   | 254   | 286   | 0.89 | 1.0  |
| <i>Cyclotella striata</i> (Kützing) Grunow                         | -   | 1   | 0.02  | 1   | 0.017   | B   | M   | Floating solitary | Floating | None   | None  | Low    | 13  | 547   | 903   | 0.61 | 1.0  |
| <i>Cyclotella tripartita</i> Håkansson                             | -   | -   | -     | 1   | 0.059   | B   | M   | Floating solitary | Floating | None   | None  | Low    | 8   | 191   | 186   | 1.03 | 1.0  |
| <i>Cylindrotheca gracilis</i> (Brébisson) Grunow                   | -   | 2   | 0.03  | -   | -       | FBM | XXL | Motile solitary   | Motile   | None   | None  | Low    | 215 | 925   | 415   | 2.23 | 41.0 |
| <i>Cymatopleura solea</i> (Brébisson) W. Smith                     | 122 | -   | -     | 1   | 0.008   | FB  | M   | Motile solitary   | Motile   | None   | None  | Low    | 78  | 4108  | 10359 | 0.40 | 5.1  |
| <i>Cymbella affinis</i> Kützing                                    | 228 | 2   | 0.03  | 38  | 5.101   | FB  | M   | Attached colony   | Attached | Bush   | Stalk | High   | 31  | 835   | 1169  | 0.71 | 3.5  |
| <i>Cymbella cistula</i> (Ehrenberg) Kirchner                       | 123 | 13  | 0.25  | 5   | 0.050   | FB  | L   | Attached colony   | Attached | Bush   | Stalk | High   | 70  | 4020  | 11960 | 0.34 | 3.7  |
| <i>Cymbella helvetica</i> Kützing                                  | 124 | -   | -     | 40  | 2.924   | FB  | M   | Attached colony   | Attached | Bush   | Stalk | High   | 62  | 2720  | 6146  | 0.44 | 4.4  |
| <i>Cymbella lanceolata</i> (C.Agardh) Kirchner                     | 34  | 10  | 0.22  | 21  | 0.235   | FB  | L   | Attached colony   | Attached | Bush   | Stalk | High   | 128 | 10740 | 46475 | 0.23 | 4.7  |
| <i>Cymbella proxima</i> Reimer                                     | -   | -   | -     | 1   | 0.008   | FB  | L   | Attached colony   | Attached | Bush   | Stalk | High   | 78  | 4585  | 16933 | 0.27 | 3.8  |
| <i>Cymbopleura amphicephala</i> (Nägeli) Krammer                   | -   | 1   | 0.01  | -   | -       | FB  | XL  | Motile solitary   | Motile   | None   | None  | Low    | 27  | 646   | 965   | 0.67 | 3.3  |
| <i>Denticula cretica</i> (Østrup) Lange Bertalot & Krammer         | 125 | 35  | 1.86  | -   | -       | B   | M   | Attached colony   | Attached | Ribbon | Pad   | Low    | 13  | 147   | 91    | 1.61 | 4.6  |
| <i>Denticula sundayensis</i> Archibald                             | 338 | 7   | 0.21  | -   | -       | B   | M   | Attached colony   | Attached | Ribbon | Pad   | Low    | 12  | 77    | 32    | 2.40 | 5.0  |
| <i>Denticula tenuis</i> var. <i>crassula</i> (Nägeli) Hustedt      | 429 | -   | -     | 36  | 11.218  | FB  | M   | Attached colony   | Attached | Ribbon | Pad   | Low    | 20  | 410   | 423   | 0.97 | 3.6  |
| <i>Diatoma botnica</i> Snoeijs                                     | 229 | -   | -     | 38  | 2.067   | B   | XL  | Attached colony   | Attached | Zigzag | Pad   | High   | 57  | 1852  | 2841  | 0.65 | 7.0  |
| <i>Diatoma moniliforme</i> (Kützing) Williams                      | 36  | 120 | 76.12 | 111 | 238.992 | FBM | XXL | Attached colony   | Attached | Zigzag | Pad   | High   | 26  | 352   | 269   | 1.31 | 7.6  |
| <i>Diatoma problematicum</i> Lange-Bertalot                        | -   | -   | -     | 1   | 0.008   | FB  | M   | Attached colony   | Attached | Zigzag | Pad   | High   | 10  | 157   | 161   | 0.98 | 1.7  |
| <i>Diatoma tenuis</i> C.A. Agardh                                  | 37  | 82  | 6.56  | 9   | 0.185   | FB  | XL  | Attached colony   | Attached | Zigzag | Pad   | High   | 70  | 959   | 749   | 1.28 | 21.8 |
| <i>Diatoma vulgare</i> Bory                                        | 38  | 60  | 11.20 | 23  | 1.269   | FB  | XL  | Attached colony   | Attached | Zigzag | Pad   | High   | 30  | 1073  | 1958  | 0.55 | 3.0  |
| <i>Dickieia subinflata</i> (Grunow) D.G. Mann                      | 169 | -   | -     | 2   | 0.101   | BM  | L   | Motile solitary   | Motile   | None   | None  | Low    | 21  | 516   | 720   | 0.72 | 3.0  |
| <i>Diploneis decipiens</i> var. <i>parallela</i> A. Cleve          | 431 | -   | -     | 1   | 0.017   | MB  | L   | Motile solitary   | Motile   | None   | None  | Low    | 46  | 3538  | 13163 | 0.27 | 1.8  |
| <i>Diploneis didyma</i> (Ehrenberg) Ehrenberg                      | 39  | -   | -     | 1   | 0.034   | FBM | XXL | Motile solitary   | Motile   | None   | None  | Low    | 42  | 2944  | 9901  | 0.30 | 2.0  |
| <i>Diploneis domblittensis</i> (Grunow) Cleve                      | 231 | 1   | 0.02  | -   | -       | B   | L   | Motile solitary   | Motile   | None   | None  | Low    | 23  | 1079  | 2258  | 0.48 | 1.6  |
| <i>Diploneis elliptica</i> (Kützing) Cleve                         | -   | -   | -     | 2   | 0.042   | FBM | XXL | Motile solitary   | Motile   | None   | None  | Low    | 60  | 5404  | 23479 | 0.23 | 2.1  |
| <i>Diploneis interrupta</i> (Kützing) Cleve                        | 40  | -   | -     | 3   | 0.034   | B   | XL  | Motile solitary   | Motile   | None   | None  | Low    | 42  | 2980  | 8737  | 0.34 | 2.0  |
| <i>Diploneis oculata</i> (Brébisson) Cleve                         | 232 | -   | -     | 2   | 0.025   | FB  | L   | Motile solitary   | Motile   | None   | None  | Low    | 17  | 364   | 371   | 0.98 | 2.6  |
| <i>Diploneis smithii</i> (Brébisson) Cleve                         | 127 | 7   | 0.10  | -   | -       | FB  | XL  | Motile solitary   | Motile   | None   | None  | Low    | 60  | 5404  | 23479 | 0.23 | 2.1  |
| <i>Diploneis smithii</i> var. <i>dilatata</i> (M. Peragallo) Terry | 128 | -   | -     | 4   | 0.067   | FBM | XXL | Motile solitary   | Motile   | None   | None  | Low    | 37  | 2569  | 8045  | 0.32 | 1.7  |
| <i>Diploneis smithii</i> var. <i>pumila</i> (Grunow) Hustedt       | 433 | 1   | 0.01  | 7   | 0.067   | BF  | L   | Motile solitary   | Motile   | None   | None  | Low    | 21  | 827   | 1452  | 0.57 | 1.8  |
| <i>Diploneis smithii</i> var. <i>rhombica</i> Mereschkowsky        | 41  | 1   | 0.02  | 4   | 0.050   | B   | L   | Motile solitary   | Motile   | None   | None  | Low    | 46  | 3538  | 13163 | 0.27 | 1.8  |
| <i>Diploneis subovalis</i> Cleve                                   | -   | -   | -     | 1   | 0.008   | FB  | M   | Motile solitary   | Motile   | None   | None  | Low    | 43  | 1972  | 5712  | 0.35 | 2.7  |
| <i>Encyonema caespitosum</i> Kützing                               | 42  | 14  | 0.36  | 34  | 0.571   | FB  | L   | Attached colony   | Motile   | Tube   | Tube  | High   | 29  | 1020  | 1869  | 0.55 | 2.6  |

|                                                                                    |     |     |      |    |        |     |     |                   |          |        |        |        |    |      |       |      |      |
|------------------------------------------------------------------------------------|-----|-----|------|----|--------|-----|-----|-------------------|----------|--------|--------|--------|----|------|-------|------|------|
| <i>Encyonema lacustre</i> (C.A. Agardh) Mills                                      | 43  | 3   | 0.22 | 17 | 0.445  | FB  | L   | Attached colony   | Motile   | Tube   | Tube   | High   | 39 | 1525 | 3037  | 0.50 | 3.8  |
| <i>Encyonema minutum</i> (Hilse) D.G. Mann                                         | -   | -   | -    | 12 | 0.689  | FBM | XXL | Attached colony   | Motile   | Tube   | Tube   | High   | 20 | 311  | 310   | 1.00 | 3.5  |
| <i>Encyonema obscurum</i> (Krasske) D.G. Mann                                      | -   | -   | -    | 1  | 0.008  | FB  | M   | Attached colony   | Motile   | Tube   | Tube   | High   | 24 | 598  | 709   | 0.84 | 3.2  |
| <i>Encyonema prostratum</i> (Berkeley) Kützing                                     | 233 | -   | -    | 6  | 0.076  | FB  | L   | Attached colony   | Motile   | Tube   | Tube   | High   | 48 | 2971 | 8806  | 0.34 | 2.7  |
| <i>Encyonema silesiacum</i> (Bleisch) D.G. Mann                                    | 234 | 1   | 0.01 | 20 | 2.160  | FB  | L   | Attached colony   | Motile   | Tube   | Tube   | High   | 24 | 598  | 709   | 0.84 | 3.2  |
| <i>Encyonema tenuissimum</i> (Hustedt) D.G. Mann                                   | -   | -   | -    | 1  | 0.008  | FB  | M   | Attached colony   | Motile   | Tube   | Tube   | High   | 24 | 598  | 709   | 0.84 | 3.2  |
| <i>Encyonopsis behrei</i> (Foged) Krammer & Metzeltin                              | 435 | -   | -    | 1  | 0.008  | FB  | M   | Motile solitary   | Motile   | None   | None   | Low    | 25 | 761  | 1205  | 0.63 | 2.8  |
| <i>Encyonopsis krammeri</i> Reichardt                                              | -   | -   | -    | 31 | 5.059  | FB  | M   | Motile solitary   | Motile   | None   | None   | Low    | 16 | 170  | 112   | 1.51 | 4.4  |
| <i>Entomoneis costata</i> (Hustedt) Reimer                                         | -   | 2   | 0.04 | -  | -      | B   | M   | Motile solitary   | Motile   | None   | None   | Low    | 29 | 1664 | 2353  | 0.71 | 1.9  |
| <i>Entomoneis gigantea</i> (Grunow) Nizamuddin                                     | -   | 4   | 0.03 | -  | -      | MB  | M   | Motile solitary   | Motile   | None   | None   | Low    | 70 | 9107 | 29523 | 0.31 | 2.0  |
| <i>Entomoneis paludosa</i> (W. Smith) Reimer                                       | 235 | 94  | 3.89 | 32 | 0.412  | FBM | XXL | Motile solitary   | Motile   | None   | None   | Low    | 62 | 7962 | 25592 | 0.31 | 1.8  |
| <i>Entomoneis pseudoduplex</i> Osada & Kobayasi                                    | 236 | 5   | 0.06 | 12 | 0.176  | B   | XL  | Motile solitary   | Motile   | None   | None   | Low    | 29 | 1664 | 2353  | 0.71 | 1.9  |
| <i>Entomoneis punctulata</i> (Grunow) Osada & Kobayasi                             | 237 | -   | -    | 3  | 0.025  | MB  | L   | Motile solitary   | Motile   | None   | None   | Low    | 64 | 7872 | 28180 | 0.28 | 1.8  |
| <i>Entomoneis surirelloides</i> (Hendey) Poulin, Berard-Therriault & Cardinal 1987 | -   | 18  | 0.18 | -  | -      | B   | M   | Motile solitary   | Motile   | None   | None   | Low    | 70 | 9107 | 29523 | 0.31 | 2.0  |
| <i>Epithemia adnata</i> (Kützing) Brébisson                                        | 132 | 23  | 0.34 | 20 | 0.891  | FB  | XL  | Attached solitary | Creeping | None   | Adnate | Low    | 42 | 1913 | 4701  | 0.41 | 2.0  |
| <i>Epithemia goeppertiana</i> Hilse                                                | -   | -   | -    | 2  | 0.017  | BF  | L   | Attached solitary | Creeping | None   | Adnate | Low    | 35 | 905  | 1112  | 0.81 | 3.2  |
| <i>Epithemia sorex</i> Kützing                                                     | 44  | 98  | 7.93 | 78 | 5.092  | FB  | XL  | Attached solitary | Creeping | None   | Adnate | Low    | 26 | 942  | 1866  | 0.50 | 1.6  |
| <i>Epithemia turgida</i> (Ehrenberg) Kützing                                       | 238 | -   | -    | 41 | 0.756  | FB  | XL  | Attached solitary | Creeping | None   | Adnate | Low    | 74 | 5242 | 20141 | 0.26 | 2.3  |
| <i>Epithemia turgida</i> var. <i>westermanni</i> (Ehrenberg) Grunow                | 45  | 36  | 0.71 | 27 | 1.084  | FBM | XXL | Attached solitary | Creeping | None   | Adnate | Low    | 67 | 5234 | 22046 | 0.24 | 1.9  |
| <i>Eucoconeis laevis</i> (Østrup) Lange-Bertalot                                   | -   | -   | -    | 7  | 0.101  | FB  | L   | Attached solitary | Creeping | None   | Adnate | Low    | 14 | 254  | 287   | 0.88 | 2.2  |
| <i>Eunotia arcus</i> Ehrenberg                                                     | -   | -   | -    | 2  | 0.034  | FB  | L   | Floating colony   | Floating | Ribbon | None   | Medium | 48 | 827  | 898   | 0.92 | 7.9  |
| <i>Eunotia pectinalis</i> var. <i>undulata</i> (Ralfs) Rabenhorst                  | -   | -   | -    | 1  | 0.008  | FB  | M   | Motile solitary   | Motile   | None   | None   | Low    | 90 | 1958 | 2658  | 0.74 | 12.0 |
| <i>Fallacia clepsidroides</i> Witkowski                                            | 239 | -   | -    | 25 | 0.681  | BM  | XXL | Motile solitary   | Motile   | None   | None   | Low    | 10 | 153  | 101   | 1.52 | 2.1  |
| <i>Fallacia cryptolyra</i> (Brockmann) Stickle & D.G. Mann                         | 240 | 31  | 0.55 | 1  | 0.017  | FB  | XL  | Motile solitary   | Motile   | None   | None   | Low    | 11 | 197  | 162   | 1.22 | 1.8  |
| <i>Fallacia florinae</i> (M. Møller) Witkowski                                     | 341 | -   | -    | 4  | 0.092  | MB  | L   | Motile solitary   | Motile   | None   | None   | Low    | 10 | 162  | 117   | 1.39 | 1.9  |
| <i>Fallacia pseudolitoricola</i> (Håkansson) Håkansson                             | 133 | 1   | 0.02 | -  | -      | B   | M   | Motile solitary   | Motile   | None   | None   | Low    | 10 | 153  | 101   | 1.52 | 2.1  |
| <i>Fallacia pseudony</i> (Hustedt) D.G. Mann                                       | 343 | -   | -    | 1  | 0.008  | BM  | L   | Motile solitary   | Motile   | None   | None   | Low    | 10 | 180  | 148   | 1.22 | 1.8  |
| <i>Fallacia pygmaea</i> (Kützing) Stickle & D.G. Mann                              | 134 | 3   | 0.06 | 9  | 0.118  | BF  | XL  | Motile solitary   | Motile   | None   | None   | Low    | 27 | 841  | 1228  | 0.68 | 2.4  |
| <i>Fistulifera saprophila</i> (Lange-Bertalot & Bonik) Lange-Bertalot              | -   | -   | -    | 2  | 0.017  | FB  | M   | Motile solitary   | Motile   | None   | None   | Low    | 7  | 73   | 29    | 2.51 | 2.6  |
| <i>Fragilaria amicornum</i> Witkowski & Lange-Bertalot                             | 135 | 104 | 9.15 | 1  | 0.076  | B   | XL  | Attached solitary | Attached | None   | Pad    | Medium | 6  | 64   | 36    | 1.79 | 2.1  |
| <i>Fragilaria capucina</i> Desmazières                                             | 136 | -   | -    | 10 | 0.378  | FB  | M   | Floating colony   | Floating | Ribbon | None   | Medium | 34 | 490  | 397   | 1.23 | 9.4  |
| <i>Fragilaria capucina</i> subsp. <i>rumpens</i> (Kützing) Lange-Bertalot          | -   | -   | -    | 68 | 17.185 | FB  | XXL | Floating colony   | Floating | Ribbon | None   | Medium | 39 | 416  | 277   | 1.50 | 9.9  |
| <i>Fragilaria capucina</i> var. <i>vaucheriae</i> (Kützing) Lange-Bertalot         | 244 | 22  | 0.35 | 43 | 15.504 | FB  | XL  | Floating colony   | Floating | Ribbon | None   | Medium | 18 | 202  | 123   | 1.64 | 6.3  |
| <i>Fragilaria construens</i> (Ehrenberg) Grunow                                    | 488 | 56  | 8.01 | 1  | 0.025  | FB  | L   | Attached colony   | Attached | Ribbon | Pad    | Low    | 13 | 358  | 399   | 0.90 | 1.6  |
| <i>Fragilaria gedanensis</i> Witkowski                                             | 137 | -   | -    | 22 | 1.101  | B   | L   | Attached colony   | Attached | Ribbon | Pad    | Low    | 9  | 68   | 29    | 2.38 | 4.5  |
| <i>Fragilaria gracilis</i> Østrup                                                  | -   | -   | -    | 29 | 3.630  | FB  | L   | Floating colony   | Floating | Ribbon | None   | Medium | 13 | 358  | 399   | 0.90 | 1.6  |
| <i>Fragilaria hyalina</i> var. <i>durietzii</i> Cleve-Euler                        | 46  | 1   | 0.02 | 7  | 1.420  | B   | L   | Attached colony   | Attached | Zigzag | Pad    | High   | 26 | 746  | 1025  | 0.73 | 3.2  |
| <i>Fragilaria nitzschoides</i> Grunow                                              | -   | -   | -    | 2  | 0.034  | MB  | M   | Floating colony   | Floating | Ribbon | None   | Medium | 37 | 443  | 336   | 1.32 | 8.1  |
| <i>Fragilaria striatula</i> Lyngbye                                                | 48  | 80  | 8.69 | -  | -      | BF  | XL  | Floating colony   | Floating | Ribbon | None   | Medium | 38 | 911  | 1238  | 0.74 | 5.1  |
| <i>Fragilariopsis cylindrus</i> (Grunow) Krieger                                   | 138 | 2   | 0.02 | 24 | 0.403  | FB  | L   | Floating colony   | Floating | Ribbon | None   | Medium | 15 | 227  | 190   | 1.20 | 4.3  |

|                                                                               |     |     |       |     |       |     |     |                   |          |        |        |        |     |       |        |      |      |
|-------------------------------------------------------------------------------|-----|-----|-------|-----|-------|-----|-----|-------------------|----------|--------|--------|--------|-----|-------|--------|------|------|
| <i>Frustulia creuzburgensis</i> (Krasske) Hustedt                             | 440 | 3   | 0.05  | -   | -     | FB  | M   | Attached colony   | Motile   | Tube   | Tube   | High   | 33  | 873   | 1310   | 0.67 | 4.7  |
| <i>Frustulia vulgaris</i> (Thwaites) De Toni                                  | -   | -   | -     | 1   | 0.008 | BM  | XL  | Attached colony   | Motile   | Tube   | Tube   | High   | 55  | 1695  | 3285   | 0.52 | 4.7  |
| <i>Gomphoneis exigua</i> (Kützing) Medlin                                     | 50  | 2   | 0.03  | 32  | 1.866 | B   | L   | Attached solitary | Attached | None   | Pad    | Medium | 16  | 192   | 124    | 1.54 | 4.2  |
| <i>Gomphonema clavatum</i> Ehrenberg                                          | -   | -   | -     | 6   | 0.126 | FB  | M   | Attached colony   | Attached | Bush   | Stalk  | High   | 55  | 2119  | 4043   | 0.52 | 3.9  |
| <i>Gomphonema intricatum</i> Kützing                                          | -   | -   | -     | 36  | 1.849 | FB  | L   | Attached colony   | Attached | Bush   | Stalk  | High   | 55  | 2119  | 4043   | 0.52 | 3.9  |
| <i>Gomphonema olivaceum</i> (Hornemann) Brébisson                             | 49  | 92  | 21.48 | 102 | 8.866 | FB  | XL  | Attached colony   | Attached | Bush   | Stalk  | High   | 34  | 1424  | 3156   | 0.45 | 2.9  |
| <i>Gomphonema parvulum</i> (Kützing) Kützing                                  | 139 | 1   | 0.01  | 6   | 0.176 | FB  | XL  | Attached colony   | Attached | Bush   | Stalk  | High   | 22  | 607   | 925    | 0.66 | 2.6  |
| <i>Gomphonemopsis exigua</i> var. <i>platypus</i> (Østrup) Snoeijs            | 443 | -   | -     | 1   | 0.151 | MB  | XXL | Attached solitary | Attached | None   | Pad    | Medium | 18  | 301   | 269    | 1.12 | 3.7  |
| <i>Gomphonemopsis obscura</i> (Krasske) Lange-Bertalot                        | -   | -   | -     | 20  | 0.739 | B   | L   | Attached solitary | Attached | None   | Pad    | Medium | 16  | 192   | 124    | 1.54 | 4.2  |
| <i>Gomphonemopsis pseudexigua</i> (Simonsen) Medlin                           | 140 | 57  | 1.63  | -   | -     | MB  | L   | Attached solitary | Attached | None   | Pad    | Medium | 11  | 120   | 71     | 1.68 | 2.9  |
| <i>Grammatophora marina</i> (Lyngbye) Kützing                                 | 345 | -   | -     | 1   | 0.017 | MB  | XL  | Attached colony   | Attached | Zigzag | Pad    | High   | 47  | 4188  | 15418  | 0.27 | 1.7  |
| <i>Grammatophora oceanica</i> Ehrenberg                                       | 141 | 2   | 0.03  | 11  | 0.714 | FB  | L   | Attached colony   | Attached | Zigzag | Pad    | High   | 25  | 1593  | 4126   | 0.39 | 1.3  |
| <i>Gyrosigma acuminatum</i> (Kützing) Rabenhorst                              | 142 | -   | -     | 6   | 0.151 | FB  | L   | Motile solitary   | Motile   | None   | None   | Low    | 145 | 6310  | 15590  | 0.40 | 9.1  |
| <i>Gyrosigma attenuatum</i> (Kützing) Rabenhorst                              | 143 | -   | -     | 3   | 0.034 | B   | M   | Motile solitary   | Motile   | None   | None   | Low    | 190 | 12403 | 45965  | 0.27 | 7.9  |
| <i>Gyrosigma eximium</i> (Thwaites) Boyer                                     | 145 | 1   | 0.02  | -   | -     | B   | L   | Attached colony   | Motile   | Tube   | Tube   | High   | 69  | 2422  | 4694   | 0.52 | 6.2  |
| <i>Gyrosigma fasciola</i> (Ehrenberg) Griffith & Henfrey                      | 347 | 2   | 0.02  | -   | -     | B   | M   | Motile solitary   | Motile   | None   | None   | Low    | 83  | 2558  | 3293   | 0.78 | 7.2  |
| <i>Gyrosigma strigilis</i> (W. Smith) Cleve                                   | 146 | -   | -     | 1   | 0.008 | B   | M   | Motile solitary   | Motile   | None   | None   | Low    | 362 | 34570 | 187367 | 0.18 | 10.3 |
| <i>Gyrosigma tenuissimum</i> (W. Smith) Griffith & Henfrey                    | -   | -   | -     | 1   | 0.008 | B   | L   | Motile solitary   | Motile   | None   | None   | Low    | 40  | 1080  | 1820   | 0.59 | 4.0  |
| <i>Halamphora acutiuscula</i> (Kützing) Levkov                                | 209 | 56  | 1.41  | -   | -     | B   | XXL | Motile solitary   | Motile   | None   | None   | Low    | 31  | 857   | 1267   | 0.68 | 2.5  |
| <i>Halamphora coffeaeformis</i> (C.A. Agardh) Levkov                          | 210 | 102 | 10.68 | 50  | 2.286 | MB  | XL  | Motile solitary   | Motile   | None   | None   | Low    | 29  | 589   | 639    | 0.92 | 3.2  |
| <i>Halamphora exigua</i> (Gregory) Levkov                                     | 315 | 27  | 0.76  | 4   | 0.050 | B   | XL  | Motile solitary   | Motile   | None   | None   | Low    | 27  | 778   | 1216   | 0.64 | 2.1  |
| <i>Halamphora holsatica</i> (Hustedt) Levkov                                  | 211 | 13  | 0.18  | 4   | 0.042 | B   | L   | Motile solitary   | Motile   | None   | None   | Low    | 37  | 1168  | 2020   | 0.58 | 2.5  |
| <i>Halamphora hybrida</i> (Grunow) Levkov                                     | 8   | 4   | 0.06  | 3   | 0.034 | BM  | XXL | Motile solitary   | Motile   | None   | None   | Low    | 37  | 1383  | 2789   | 0.50 | 2.2  |
| <i>Halamphora luciae</i> (Cholnoky) Levkov                                    | 411 | 1   | 0.01  | 19  | 0.546 | FB  | M   | Motile solitary   | Motile   | None   | None   | Low    | 21  | 323   | 270    | 1.20 | 3.0  |
| <i>Halamphora normanii</i> (Rabenhorst) Levkov                                | -   | -   | -     | 1   | 0.034 | B   | M   | Motile solitary   | Motile   | None   | None   | Low    | 25  | 273   | 142    | 1.93 | 5.4  |
| <i>Halamphora subholsatica</i> (Krammer) Levkov                               | 413 | 26  | 0.48  | 1   | 0.017 | MB  | XXL | Motile solitary   | Motile   | None   | None   | Low    | 41  | 1443  | 2755   | 0.52 | 2.6  |
| <i>Halamphora tenerrima</i> (Aleem & Hustedt) Levkov                          | 414 | 68  | 2.84  | 45  | 1.748 | FB  | XL  | Motile solitary   | Motile   | None   | None   | Low    | 14  | 177   | 120    | 1.47 | 2.5  |
| <i>Halamphora veneta</i> (Kützing) Levkov                                     | 216 | 2   | 0.02  | 38  | 1.487 | B   | L   | Motile solitary   | Motile   | None   | None   | Low    | 16  | 250   | 215    | 1.16 | 2.2  |
| <i>Hantzschia baltica</i> Simonsen                                            | -   | -   | -     | 4   | 0.050 | FBM | XXL | Motile solitary   | Motile   | None   | None   | Low    | 77  | 2847  | 5455   | 0.52 | 7.6  |
| <i>Haslea spicula</i> (Hickie) Lange-Bertalot                                 | 188 | 69  | 2.75  | 11  | 0.143 | FB  | L   | Motile solitary   | Motile   | None   | None   | Low    | 85  | 1878  | 2347   | 0.80 | 10.9 |
| <i>Hippodonta capitata</i> (Ehrenberg) Lange-Bertalot, Metzeltin & Witkowski  | -   | -   | -     | 5   | 0.277 | FB  | L   | Motile solitary   | Motile   | None   | None   | Low    | 17  | 251   | 239    | 1.05 | 3.1  |
| <i>Hippodonta hungarica</i> (Grunow) Lange-Bertalot, Metzeltin & Witkowski    | 156 | 17  | 0.45  | 8   | 0.109 | FBM | XXL | Motile solitary   | Motile   | None   | None   | Low    | 19  | 392   | 413    | 0.95 | 3.3  |
| <i>Hippodonta lesmonensis</i> (Hustedt) Lange-Bertalot, Metzeltin & Witkowski | 361 | 37  | 0.88  | 2   | 0.025 | MB  | M   | Motile solitary   | Motile   | None   | None   | Low    | 19  | 496   | 542    | 0.92 | 2.7  |
| <i>Hyalodiscus scoticus</i> (Kützing) Grunow                                  | 147 | 18  | 0.27  | -   | -     | B   | L   | Attached solitary | Attached | None   | Pad    | Medium | 20  | 1256  | 3140   | 0.40 | 1.0  |
| <i>Karayevia amoena</i> (Hustedt) Bukhtiyarova                                | 1   | 11  | 1.02  | 11  | 0.143 | FB  | L   | Attached solitary | Creeping | None   | Adnate | Low    | 13  | 145   | 85     | 1.71 | 3.1  |
| <i>Karayevia clevei</i> (Grunow) Bukhtiyarova                                 | 203 | 40  | 0.70  | 16  | 0.294 | FB  | M   | Attached solitary | Creeping | None   | Adnate | Low    | 13  | 196   | 156    | 1.26 | 2.2  |
| <i>Karayevia nitidiformis</i> (Lange-Bertalot) Bukhtiyarova                   | -   | -   | -     | 1   | 0.008 | B   | L   | Attached solitary | Creeping | None   | Adnate | Low    | 14  | 171   | 131    | 1.30 | 3.3  |
| <i>Karayevia submarina</i> (Hustedt) Bukhtiyarova                             | 104 | -   | -     | 7   | 0.185 | FB  | M   | Attached solitary | Creeping | None   | Adnate | Low    | 10  | 116   | 62     | 1.87 | 2.6  |
| <i>Lemnicola hungarica</i> (Grunow) Round & Basson                            | -   | -   | -     | 3   | 0.025 | MB  | M   | Attached solitary | Creeping | None   | Adnate | Low    | 24  | 418   | 454    | 0.92 | 4.0  |
| <i>Licmophora communis</i> (Heiberg) Grunow                                   | 51  | 5   | 0.12  | -   | -     | BM  | XL  | Attached colony   | Attached | Bush   | Stalk  | High   | 41  | 2521  | 6941   | 0.36 | 2.3  |

|                                                                                        |     |     |       |    |        |     |     |                   |          |       |      |        |    |      |       |      |     |
|----------------------------------------------------------------------------------------|-----|-----|-------|----|--------|-----|-----|-------------------|----------|-------|------|--------|----|------|-------|------|-----|
| <i>Licmophora debilis</i> (Kützing) Grunow                                             | 351 | 47  | 2.06  | 6  | 0.151  | BM  | XL  | Attached solitary | Attached | None  | Pad  | Medium | 36 | 1357 | 2234  | 0.61 | 3.0 |
| <i>Licmophora gracilis</i> var. <i>anglica</i> (Kützing) H. Peragallo & M. Peragallo   | 352 | 6   | 0.08  | 46 | 3.025  | MB  | L   | Attached solitary | Attached | None  | Pad  | Medium | 83 | 8466 | 38844 | 0.22 | 2.8 |
| <i>Licmophora oedipus</i> (Kützing) Grunow                                             | 149 | -   | -     | 6  | 0.193  | B   | M   | Attached solitary | Attached | None  | Pad  | Medium | 42 | 1470 | 2151  | 0.68 | 4.0 |
| <i>Licmophora rhombica</i> Møller                                                      | 150 | 14  | 0.51  | 2  | 0.025  | MB  | XL  | Attached solitary | Attached | None  | Pad  | Medium | 35 | 3312 | 12460 | 0.27 | 1.3 |
| <i>Lunella bisecta</i> Snoeijs                                                         | 353 | 85  | 5.24  | 69 | 5.227  | FB  | XL  | Motile solitary   | Motile   | None  | None | Low    | 8  | 80   | 35    | 2.27 | 2.6 |
| <i>Luticola mutica</i> (Kützing) D.G. Mann                                             | 151 | 4   | 0.07  | 1  | 0.017  | FB  | XL  | Motile solitary   | Motile   | None  | None | Low    | 17 | 425  | 566   | 0.75 | 2.1 |
| <i>Martyana atomus</i> (Hustedt) Snoeijs                                               | 53  | 119 | 22.44 | 68 | 17.000 | FB  | XL  | Attached solitary | Attached | None  | Pad  | Medium | 5  | 63   | 33    | 1.92 | 1.6 |
| <i>Martyana martyi</i> (Héribaud) Round                                                | 354 | -   | -     | 31 | 1.857  | BF  | XL  | Attached solitary | Attached | None  | Pad  | Medium | 16 | 485  | 673   | 0.72 | 2.0 |
| <i>Martyana schulzii</i> (Brockmann) Snoeijs                                           | 54  | 7   | 0.10  | 43 | 4.244  | BF  | L   | Attached solitary | Attached | None  | Pad  | Medium | 14 | 330  | 364   | 0.91 | 2.2 |
| <i>Mastogloia baltica</i> Grunow                                                       | 55  | 2   | 0.08  | 4  | 0.034  | BF  | L   | Motile solitary   | Motile   | None  | None | Low    | 36 | 1659 | 3318  | 0.50 | 3.0 |
| <i>Mastogloia braunii</i> Grunow                                                       | 56  | 6   | 0.17  | 1  | 0.008  | BF  | XL  | Motile solitary   | Motile   | None  | None | Low    | 39 | 1989 | 5165  | 0.39 | 2.7 |
| <i>Mastogloia elliptica</i> (C.A. Agardh) Cleve                                        | 57  | 21  | 0.50  | 15 | 0.202  | BM  | XL  | Motile solitary   | Motile   | None  | None | Low    | 32 | 1339 | 2921  | 0.46 | 2.6 |
| <i>Mastogloia exigua</i> Lewis                                                         | 247 | 2   | 0.09  | 2  | 0.067  | MB  | L   | Motile solitary   | Motile   | None  | None | Low    | 35 | 1520 | 3108  | 0.49 | 2.9 |
| <i>Mastogloia pumila</i> (Cleve & Möller) Cleve                                        | 58  | 40  | 3.76  | 16 | 0.370  | FBM | XXL | Motile solitary   | Motile   | None  | None | Low    | 26 | 744  | 1110  | 0.67 | 3.0 |
| <i>Mastogloia pusilla</i> Grunow                                                       | 249 | -   | -     | 1  | 0.008  | FB  | XL  | Motile solitary   | Motile   | None  | None | Low    | 19 | 499  | 662   | 0.75 | 2.7 |
| <i>Mastogloia smithii</i> Thwaites                                                     | 59  | 81  | 11.46 | 52 | 2.261  | FB  | M   | Motile solitary   | Motile   | None  | None | Low    | 34 | 1256 | 2402  | 0.52 | 3.1 |
| <i>Mastogloia smithii</i> var. <i>amphicephala</i> Grunow                              | 250 | -   | -     | 22 | 0.588  | FB  | XL  | Motile solitary   | Motile   | None  | None | Low    | 37 | 1628 | 3083  | 0.53 | 3.1 |
| <i>Mayamaea atomus</i> (Kützing) Lange-Bertalot                                        | -   | 1   | 0.01  | -  | -      | B   | XXL | Motile solitary   | Motile   | None  | None | Low    | 8  | 84   | 53    | 1.58 | 2.4 |
| <i>Melosira arctica</i> Dickie                                                         | 60  | 4   | 0.07  | 2  | 0.042  | MB  | XL  | Attached colony   | Floating | Chain | Pad  | High   | 20 | 1283 | 3490  | 0.37 | 1.3 |
| <i>Melosira lineata</i> (Dillwyn) C.A. Agardh = <i>M. jurgensii</i> sensu Kützing 1844 | 61  | 77  | 4.53  | 31 | 0.765  | MB  | XXL | Attached colony   | Floating | Chain | Pad  | High   | 29 | 1628 | 4671  | 0.35 | 2.0 |
| <i>Melosira moniliformis</i> (O.F. Müller) C.A. Agardh                                 | 62  | 67  | 5.73  | 21 | 1.008  | MB  | XXL | Attached colony   | Floating | Chain | Pad  | High   | 37 | 6172 | 37231 | 0.17 | 1.0 |
| <i>Melosira nummuloides</i> C.A. Agardh                                                | 63  | 22  | 3.65  | 18 | 0.445  | B   | M   | Attached colony   | Floating | Chain | Pad  | High   | 17 | 906  | 2055  | 0.44 | 1.4 |
| <i>Melosira</i> sp. = <i>M. lineata</i> sensu Kützing 1844                             | -   | 96  | 67.92 | -  | -      | FB  | M   | Attached colony   | Floating | Chain | Pad  | High   | 23 | 1671 | 4894  | 0.34 | 1.0 |
| <i>Melosira varians</i>                                                                | 64  | -   | -     | 2  | 0.050  | BM  | L   | Attached colony   | Floating | Chain | Pad  | High   | 21 | 1118 | 2773  | 0.40 | 1.6 |
| <i>Navicula arenaria</i> Donkin                                                        | 452 | 1   | 0.01  | 1  | 0.017  | BM  | XL  | Motile solitary   | Motile   | None  | None | Low    | 48 | 2064 | 5033  | 0.41 | 3.8 |
| <i>Navicula bipustulata</i> A. Mann                                                    | 356 | -   | -     | 2  | 0.025  | BM  | XL  | Motile solitary   | Motile   | None  | None | Low    | 28 | 552  | 629   | 0.88 | 4.7 |
| <i>Navicula bossvikensis</i> Busse & Snoeijs                                           | -   | -   | -     | 13 | 0.462  | B   | XXL | Motile solitary   | Motile   | None  | None | Low    | 13 | 159  | 103   | 1.54 | 3.0 |
| <i>Navicula bottnica</i> Grunow in Cleve & Möller                                      | 155 | -   | -     | 36 | 1.017  | FB  | M   | Motile solitary   | Motile   | None  | None | Low    | 55 | 2178 | 4854  | 0.45 | 4.7 |
| <i>Navicula bremensis</i> Hustedt                                                      | -   | 18  | 0.26  | 1  | 0.008  | FB  | M   | Motile solitary   | Motile   | None  | None | Low    | 7  | 73   | 29    | 2.51 | 2.6 |
| <i>Navicula capitoradiata</i> Germain                                                  | -   | -   | -     | 3  | 0.118  | BF  | XL  | Motile solitary   | Motile   | None  | None | Low    | 34 | 714  | 950   | 0.75 | 4.6 |
| <i>Navicula cincta</i> (Ehrenberg) Ralfs                                               | -   | 1   | 0.05  | 7  | 0.059  | FBM | XXL | Motile solitary   | Motile   | None  | None | Low    | 22 | 306  | 266   | 1.15 | 4.6 |
| <i>Navicula clementis</i> Grunow                                                       | 183 | 1   | 0.01  | 8  | 0.109  | FBM | XXL | Motile solitary   | Motile   | None  | None | Low    | 21 | 551  | 688   | 0.80 | 2.7 |
| <i>Navicula cryptocephala</i> Kützing                                                  | 157 | 9   | 0.20  | 50 | 3.739  | B   | L   | Motile solitary   | Motile   | None  | None | Low    | 25 | 497  | 558   | 0.89 | 4.1 |
| <i>Navicula digitoradiata</i> (Gregory) Ralfs                                          | 158 | 6   | 0.07  | 2  | 0.025  | MB  | M   | Motile solitary   | Motile   | None  | None | Low    | 47 | 2222 | 5929  | 0.37 | 3.2 |
| <i>Navicula duerrenbergiana</i> Hustedt                                                | 65  | 67  | 3.50  | 3  | 0.050  | BF  | L   | Motile solitary   | Motile   | None  | None | Low    | 48 | 836  | 831   | 1.01 | 8.8 |
| <i>Navicula eidrigiana</i> Carter                                                      | 358 | -   | -     | 1  | 0.008  | B   | L   | Motile solitary   | Motile   | None  | None | Low    | 42 | 1073 | 1553  | 0.69 | 5.5 |
| <i>Navicula flanatica</i> Grunow                                                       | 254 | 7   | 0.07  | 6  | 0.076  | FB  | L   | Motile solitary   | Motile   | None  | None | Low    | 29 | 779  | 966   | 0.81 | 4.0 |
| <i>Navicula germainii</i> Wallace                                                      | 359 | -   | -     | 7  | 0.353  | B   | XL  | Motile solitary   | Motile   | None  | None | Low    | 46 | 1526 | 2597  | 0.59 | 4.7 |
| <i>Navicula germanopolonica</i> Witkowski & Lange-Bertalot                             | 255 | -   | -     | 8  | 0.218  | FBM | XXL | Motile solitary   | Motile   | None  | None | Low    | 10 | 172  | 135   | 1.28 | 2.3 |
| <i>Navicula gregaria</i> Donkin                                                        | 160 | 99  | 4.95  | 88 | 8.176  | B   | M   | Motile solitary   | Motile   | None  | None | Low    | 33 | 858  | 1279  | 0.67 | 4.0 |

|                                                                |     |     |       |    |        |     |     |                 |        |      |      |      |     |      |       |      |      |
|----------------------------------------------------------------|-----|-----|-------|----|--------|-----|-----|-----------------|--------|------|------|------|-----|------|-------|------|------|
| <i>Navicula hanseatica</i> Lange-Bertalot & Stachura           | -   | -   | -     | 1  | 0.017  | MB  | L   | Motile solitary | Motile | None | None | Low  | 12  | 126  | 74    | 1.70 | 3.8  |
| <i>Navicula hansenii</i> Møller                                | -   | -   | -     | 22 | 1.479  | BM  | L   | Motile solitary | Motile | None | None | Low  | 12  | 126  | 74    | 1.70 | 3.8  |
| <i>Navicula hustediana</i> Simonsen                            | -   | -   | -     | 1  | 0.008  | B   | M   | Motile solitary | Motile | None | None | Low  | 12  | 126  | 74    | 1.70 | 3.8  |
| <i>Navicula infirmitata</i> Giffen                             | 454 | 62  | 4.28  | -  | -      | FB  | XXL | Motile solitary | Motile | None | None | Low  | 7   | 73   | 29    | 2.51 | 2.6  |
| <i>Navicula lanceolata</i> Ehrenberg                           | 66  | 26  | 0.52  | 57 | 5.218  | FB  | L   | Motile solitary | Motile | None | None | Low  | 58  | 2069 | 4178  | 0.50 | 5.5  |
| <i>Navicula laterostrata</i> Hustedt                           | 161 | -   | -     | 5  | 0.050  | B   | M   | Motile solitary | Motile | None | None | Low  | 24  | 601  | 706   | 0.85 | 3.4  |
| <i>Navicula margalithii</i> Lange-Bertalot                     | -   | -   | -     | 6  | 0.311  | BF  | XL  | Motile solitary | Motile | None | None | Low  | 46  | 1252 | 1932  | 0.65 | 5.7  |
| <i>Navicula meniscus</i> Schumann                              | 256 | 2   | 0.02  | 8  | 0.101  | BF  | L   | Motile solitary | Motile | None | None | Low  | 40  | 2095 | 5160  | 0.41 | 2.7  |
| <i>Navicula microdigitoradiata</i> Lange-Bertalot              | 257 | -   | -     | 1  | 0.008  | FB  | M   | Motile solitary | Motile | None | None | Low  | 30  | 602  | 686   | 0.88 | 5.2  |
| <i>Navicula nolens</i> Simonsen                                | -   | 3   | 0.04  | 2  | 0.025  | BF  | L   | Motile solitary | Motile | None | None | Low  | 7   | 73   | 29    | 2.51 | 2.6  |
| <i>Navicula oblonga</i> (Kützing) Kützing                      | 162 | -   | -     | 1  | 0.008  | B   | L   | Motile solitary | Motile | None | None | Low  | 131 | 7928 | 27258 | 0.29 | 7.7  |
| <i>Navicula oestrupi</i> Schulz                                | 363 | -   | -     | 2  | 0.017  | B   | L   | Motile solitary | Motile | None | None | Low  | 23  | 669  | 944   | 0.71 | 3.0  |
| <i>Navicula peregrina</i> (Ehrenberg) Kützing                  | 163 | 5   | 0.07  | 3  | 0.235  | MB  | XXL | Motile solitary | Motile | None | None | Low  | 103 | 6510 | 23072 | 0.28 | 5.2  |
| <i>Navicula perminuta</i> Grunow in Van Heurck                 | 69  | 120 | 68.90 | 91 | 49.218 | B   | XXL | Attached colony | Motile | Tube | Tube | High | 12  | 126  | 74    | 1.70 | 3.8  |
| <i>Navicula phyllepta</i> Kützing                              | 258 | 73  | 2.50  | 86 | 5.849  | MB  | M   | Motile solitary | Motile | None | None | Low  | 14  | 236  | 207   | 1.14 | 2.8  |
| <i>Navicula portanova</i> Riznyk                               | 164 | -   | -     | 1  | 0.008  | FB  | M   | Motile solitary | Motile | None | None | Low  | 35  | 1281 | 2423  | 0.53 | 3.4  |
| <i>Navicula radiosa</i> Kützing                                | 366 | -   | -     | 1  | 0.008  | MB  | XL  | Motile solitary | Motile | None | None | Low  | 61  | 2386 | 5270  | 0.45 | 5.1  |
| <i>Navicula ramosissima</i> (C.A. Agardh) Cleve                | 70  | -   | -     | 41 | 7.782  | MB  | L   | Attached colony | Motile | Tube | Tube | High | 27  | 519  | 564   | 0.92 | 4.6  |
| <i>Navicula ramosissima</i> var. <i>torquata</i> (Harvey) Ross | 456 | 40  | 1.42  | 3  | 0.034  | B   | M   | Attached colony | Motile | Tube | Tube | High | 29  | 662  | 853   | 0.78 | 4.1  |
| <i>Navicula recens</i> (Lange-Bertalot) Lange-Bertalot         | -   | -   | -     | 1  | 0.008  | FBM | XXL | Motile solitary | Motile | None | None | Low  | 48  | 836  | 831   | 1.01 | 8.8  |
| <i>Navicula rhynchocephala</i> Kützing                         | 71  | 6   | 0.12  | 52 | 1.403  | BF  | XL  | Motile solitary | Motile | None | None | Low  | 42  | 1918 | 4013  | 0.48 | 3.3  |
| <i>Navicula salinarum</i> Grunow in Cleve & Grunow             | 167 | 8   | 0.14  | 10 | 0.412  | MB  | XL  | Motile solitary | Motile | None | None | Low  | 25  | 822  | 1370  | 0.60 | 2.7  |
| <i>Navicula salinicola</i> Hustedt                             | -   | 22  | 0.37  | -  | -      | FBM | XXL | Motile solitary | Motile | None | None | Low  | 12  | 126  | 74    | 1.70 | 3.8  |
| <i>Navicula sjoersii</i> Busse & Snoeijjs                      | -   | 14  | 0.31  | 56 | 4.462  | B   | XL  | Motile solitary | Motile | None | None | Low  | 10  | 116  | 71    | 1.63 | 2.4  |
| <i>Navicula starmachioides</i> Witkowski & Lange-Bertalot      | 458 | -   | -     | 8  | 0.555  | B   | M   | Motile solitary | Motile | None | None | Low  | 20  | 209  | 122   | 1.71 | 6.1  |
| <i>Navicula subrhynchocephala</i> Hustedt                      | -   | -   | -     | 1  | 0.008  | B   | XL  | Motile solitary | Motile | None | None | Low  | 36  | 844  | 1253  | 0.67 | 4.3  |
| <i>Navicula supralitoralis</i> Aleem & Hustedt                 | 459 | 13  | 0.18  | 6  | 0.151  | FBM | XXL | Motile solitary | Motile | None | None | Low  | 7   | 73   | 29    | 2.51 | 2.6  |
| <i>Navicula tripunctata</i> (O.F. Müller) Bory                 | 260 | 13  | 0.21  | 6  | 0.143  | B   | L   | Attached colony | Motile | Tube | Tube | High | 46  | 1252 | 1932  | 0.65 | 5.7  |
| <i>Navicula veneta</i> Kützing                                 | -   | 21  | 0.41  | 23 | 0.437  | FB  | L   | Motile solitary | Motile | None | None | Low  | 26  | 415  | 413   | 1.00 | 4.7  |
| <i>Navicymbula pusilla</i> (Grunow) K.Krammer                  | 35  | 29  | 0.82  | 9  | 0.185  | FBM | XXL | Motile solitary | Motile | None | None | Low  | 20  | 318  | 263   | 1.21 | 4.0  |
| <i>Nitzschia acicularis</i> (Kützing) W. Smith                 | 73  | -   | -     | 4  | 0.034  | FB  | M   | Motile solitary | Motile | None | None | Low  | 72  | 715  | 373   | 1.92 | 20.0 |
| <i>Nitzschia amphibia</i> Grunow                               | -   | 11  | 0.15  | -  | -      | B   | L   | Motile solitary | Motile | None | None | Low  | 26  | 314  | 242   | 1.30 | 6.0  |
| <i>Nitzschia angustatula</i> Lange-Bertalot                    | 460 | 26  | 0.41  | 5  | 0.151  | FB  | M   | Motile solitary | Motile | None | None | Low  | 20  | 259  | 188   | 1.38 | 4.9  |
| <i>Nitzschia angustiforaminata</i> Lange-Bertalot              | -   | -   | -     | 5  | 0.109  | FB  | L   | Motile solitary | Motile | None | None | Low  | 84  | 2099 | 2723  | 0.77 | 11.4 |
| <i>Nitzschia archibaldii</i> Lange-Bertalot                    | -   | -   | -     | 14 | 0.697  | BM  | XL  | Motile solitary | Motile | None | None | Low  | 23  | 150  | 61    | 2.46 | 10.2 |
| <i>Nitzschia aurariae</i> Cholnoky                             | 262 | 4   | 0.07  | 24 | 1.546  | FB  | XXL | Motile solitary | Motile | None | None | Low  | 12  | 121  | 64    | 1.90 | 4.1  |
| <i>Nitzschia bacillum</i> Hustedt                              | 462 | -   | -     | 24 | 0.731  | FB  | M   | Motile solitary | Motile | None | None | Low  | 16  | 225  | 160   | 1.41 | 3.6  |
| <i>Nitzschia brevissima</i> Grunow                             | 368 | 9   | 0.21  | -  | -      | B   | XXL | Motile solitary | Motile | None | None | Low  | 31  | 661  | 629   | 1.05 | 6.0  |
| <i>Nitzschia commutata</i> Grunow                              | -   | 2   | 0.02  | -  | -      | B   | L   | Motile solitary | Motile | None | None | Low  | 80  | 3157 | 6463  | 0.49 | 7.3  |
| <i>Nitzschia dippelii</i> Grunow                               | 263 | -   | -     | 10 | 0.160  | FB  | L   | Motile solitary | Motile | None | None | Low  | 84  | 2099 | 2723  | 0.77 | 11.4 |

|                                                                 |     |     |       |    |        |     |     |                 |          |        |      |        |     |       |       |      |      |
|-----------------------------------------------------------------|-----|-----|-------|----|--------|-----|-----|-----------------|----------|--------|------|--------|-----|-------|-------|------|------|
| <i>Nitzschia dissipata</i> (Kützing) Grunow                     | 369 | 10  | 0.15  | 17 | 0.639  | MB  | XL  | Motile solitary | Motile   | None   | None | Low    | 25  | 342   | 240   | 1.43 | 6.3  |
| <i>Nitzschia dissipata</i> var. <i>media</i> (Hantzsch) Grunow  | -   | -   | -     | 4  | 0.034  | FB  | XL  | Motile solitary | Motile   | None   | None | Low    | 25  | 284   | 206   | 1.38 | 6.1  |
| <i>Nitzschia distans</i> Gregory                                | 370 | -   | -     | 7  | 0.269  | BF  | L   | Motile solitary | Motile   | None   | None | Low    | 47  | 1303  | 1718  | 0.76 | 5.3  |
| <i>Nitzschia dubia</i> W. Smith                                 | 264 | 2   | 0.03  | 2  | 0.034  | B   | L   | Motile solitary | Motile   | None   | None | Low    | 80  | 3157  | 6463  | 0.49 | 7.3  |
| <i>Nitzschia elegantula</i> Grunow                              | 266 | 10  | 0.21  | 6  | 0.092  | B   | XL  | Motile solitary | Motile   | None   | None | Low    | 15  | 185   | 107   | 1.73 | 4.1  |
| <i>Nitzschia filiformis</i> (W. Smith) Van Heurck               | 74  | 49  | 10.55 | -  | -      | B   | M   | Attached colony | Motile   | Tube   | Tube | High   | 64  | 1072  | 1007  | 1.06 | 12.1 |
| <i>Nitzschia flexa</i> Schumann                                 | -   | 10  | 0.20  | -  | -      | BF  | XL  | Floating colony | Floating | Zigzag | None | Medium | 104 | 2105  | 2388  | 0.88 | 16.3 |
| <i>Nitzschia frigida</i> Grunow                                 | 75  | -   | -     | 2  | 0.067  | FBM | XXL | Floating colony | Floating | Zigzag | None | Medium | 42  | 729   | 706   | 1.03 | 9.1  |
| <i>Nitzschia frustulum</i> (Kützing) Grunow                     | 76  | 121 | 98.73 | 99 | 58.000 | B   | M   | Motile solitary | Motile   | None   | None | Low    | 21  | 150   | 61    | 2.45 | 9.0  |
| <i>Nitzschia gandersheimiensis</i> Krasske                      | -   | 6   | 0.11  | -  | -      | BM  | L   | Motile solitary | Motile   | None   | None | Low    | 61  | 885   | 722   | 1.23 | 13.2 |
| <i>Nitzschia grossestriata</i> Hustedt                          | 371 | -   | -     | 9  | 0.336  | BF  | XL  | Motile solitary | Motile   | None   | None | Low    | 36  | 489   | 373   | 1.31 | 8.4  |
| <i>Nitzschia heufferiana</i> Grunow                             | 372 | 4   | 0.05  | 24 | 0.353  | FB  | XXL | Motile solitary | Motile   | None   | None | Low    | 169 | 3178  | 3390  | 0.94 | 30.2 |
| <i>Nitzschia inconspicua</i> Grunow                             | 77  | 23  | 0.36  | 77 | 49.756 | FB  | M   | Motile solitary | Motile   | None   | None | Low    | 8   | 55    | 21    | 2.59 | 3.9  |
| <i>Nitzschia intermedia</i> Hantzsch                            | -   | -   | -     | 3  | 0.387  | FB  | L   | Motile solitary | Motile   | None   | None | Low    | 80  | 1392  | 1512  | 0.92 | 13.3 |
| <i>Nitzschia liebetruthii</i> Rabenhorst                        | -   | 77  | 3.71  | 46 | 4.370  | FB  | L   | Motile solitary | Motile   | None   | None | Low    | 26  | 296   | 214   | 1.38 | 6.4  |
| <i>Nitzschia linearis</i> var. <i>subtilis</i> (Grunow) Hustedt | -   | 7   | 0.11  | 24 | 1.765  | B   | M   | Motile solitary | Motile   | None   | None | Low    | 105 | 1523  | 1378  | 1.10 | 21.0 |
| <i>Nitzschia lorenziana</i> Grunow                              | 464 | 1   | 0.02  | 1  | 0.008  | FB  | XXL | Motile solitary | Motile   | None   | None | Low    | 173 | 2474  | 1903  | 1.30 | 34.6 |
| <i>Nitzschia microcephala</i> Grunow                            | 171 | 110 | 17.82 | 77 | 6.790  | FB  | L   | Motile solitary | Motile   | None   | None | Low    | 10  | 105   | 55    | 1.90 | 3.4  |
| <i>Nitzschia palea</i> (Kützing) W. Smith                       | -   | 56  | 1.54  | 17 | 0.571  | B   | M   | Motile solitary | Motile   | None   | None | Low    | 26  | 268   | 157   | 1.71 | 7.8  |
| <i>Nitzschia palea</i> var. <i>tenuirostris</i> Grunow          | -   | 27  | 0.94  | -  | -      | BF  | XL  | Motile solitary | Motile   | None   | None | Low    | 28  | 244   | 132   | 1.84 | 9.3  |
| <i>Nitzschia paleacea</i> Grunow                                | 172 | 109 | 29.95 | 22 | 0.487  | FB  | M   | Motile solitary | Motile   | None   | None | Low    | 24  | 135   | 43    | 3.13 | 13.2 |
| <i>Nitzschia pellucida</i> Grunow                               | -   | 61  | 4.34  | 6  | 0.193  | FB  | M   | Motile solitary | Motile   | None   | None | Low    | 60  | 1218  | 1544  | 0.79 | 8.6  |
| <i>Nitzschia perminuta</i> (Grunow) M. Peragallo                | -   | 12  | 0.20  | 4  | 0.118  | BF  | XXL | Motile solitary | Motile   | None   | None | Low    | 14  | 142   | 90    | 1.58 | 4.0  |
| <i>Nitzschia pusilla</i> Grunow                                 | 267 | 65  | 5.65  | 49 | 2.487  | FB  | M   | Motile solitary | Motile   | None   | None | Low    | 23  | 384   | 328   | 1.17 | 4.9  |
| <i>Nitzschia recta</i> Hantzsch in Rabenhorst                   | 268 | -   | -     | 3  | 0.025  | MB  | L   | Motile solitary | Motile   | None   | None | Low    | 99  | 2150  | 2652  | 0.81 | 16.2 |
| <i>Nitzschia reversa</i> W. Smith                               | 269 | 11  | 0.17  | -  | -      | FB  | L   | Motile solitary | Motile   | None   | None | Low    | 188 | 2471  | 1116  | 2.21 | 30.7 |
| <i>Nitzschia rosenstockii</i> Lange-Bertalot                    | -   | 118 | 30.29 | 71 | 9.361  | BF  | L   | Motile solitary | Motile   | None   | None | Low    | 14  | 125   | 62    | 2.02 | 5.0  |
| <i>Nitzschia salinicola</i> Aleem & Hustedt                     | 466 | -   | -     | 2  | 0.109  | B   | XL  | Motile solitary | Motile   | None   | None | Low    | 32  | 529   | 452   | 1.17 | 6.8  |
| <i>Nitzschia sigma</i> (Kützing) W. Smith                       | 173 | 15  | 0.22  | 22 | 0.286  | FB  | XL  | Motile solitary | Motile   | None   | None | Low    | 388 | 13855 | 27744 | 0.50 | 34.3 |
| <i>Nitzschia sigmoidea</i> (Nitzsch) W. Smith                   | 271 | 1   | 0.01  | 1  | 0.017  | FB  | L   | Motile solitary | Motile   | None   | None | Low    | 314 | 23004 | 92325 | 0.25 | 15.9 |
| <i>Nitzschia sociabilis</i> Hustedt                             | -   | 5   | 0.07  | 9  | 0.227  | FB  | M   | Motile solitary | Motile   | None   | None | Low    | 38  | 512   | 390   | 1.31 | 9.5  |
| <i>Nitzschia solita</i> Hustedt                                 | -   | -   | -     | 9  | 0.244  | B   | M   | Motile solitary | Motile   | None   | None | Low    | 35  | 609   | 662   | 0.92 | 5.8  |
| <i>Nitzschia subcapitellata</i> Hustedt                         | -   | 3   | 0.05  | -  | -      | FB  | M   | Motile solitary | Motile   | None   | None | Low    | 25  | 342   | 240   | 1.43 | 6.3  |
| <i>Nitzschia sublinearis</i> Hustedt                            | -   | -   | -     | 1  | 0.017  | FB  | M   | Motile solitary | Motile   | None   | None | Low    | 104 | 2105  | 2388  | 0.88 | 16.3 |
| <i>Nitzschia supralitoria</i> Hustedt                           | -   | 50  | 1.31  | -  | -      | BF  | XXL | Motile solitary | Motile   | None   | None | Low    | 26  | 268   | 157   | 1.71 | 7.8  |
| <i>Nitzschia thermaloides</i> Hustedt                           | 78  | 76  | 4.73  | 50 | 1.958  | FB  | M   | Motile solitary | Motile   | None   | None | Low    | 59  | 1319  | 1680  | 0.78 | 9.3  |
| <i>Nitzschia umbonata</i> (Ehrenberg) Lange-Bertalot            | -   | -   | -     | 1  | 0.008  | FB  | XL  | Motile solitary | Motile   | None   | None | Low    | 25  | 342   | 240   | 1.43 | 6.3  |
| <i>Nitzschia valdestriata</i> Aleem & Hustedt                   | 174 | 69  | 2.06  | 51 | 1.857  | FB  | M   | Motile solitary | Motile   | None   | None | Low    | 7   | 64    | 33    | 1.94 | 2.6  |
| <i>Nitzschia vermicularis</i> (Kützing) Hantzsch                | -   | -   | -     | 1  | 0.008  | B   | L   | Motile solitary | Motile   | None   | None | Low    | 170 | 2958  | 3213  | 0.92 | 28.3 |
| <i>Nitzschia vitrea</i> Norman                                  | 468 | -   | -     | 18 | 0.294  | FB  | M   | Motile solitary | Motile   | None   | None | Low    | 66  | 1506  | 1940  | 0.78 | 9.4  |



|                                                                              |     |     |       |    |        |     |     |                   |          |        |        |        |     |       |        |      |      |
|------------------------------------------------------------------------------|-----|-----|-------|----|--------|-----|-----|-------------------|----------|--------|--------|--------|-----|-------|--------|------|------|
| <i>Nitzschia wuellerstorffii</i> Lange-Bertalot                              | -   | -   | -     | 1  | 0.008  | B   | L   | Motile solitary   | Motile   | None   | None   | Low    | 26  | 268   | 157    | 1.71 | 7.8  |
| <i>Opephora krumbeynii</i> Witkowski, Witak & Stachura                       | -   | -   | -     | 31 | 9.504  | BM  | XXL | Attached colony   | Attached | Ribbon | Pad    | Low    | 13  | 190   | 140    | 1.36 | 3.1  |
| <i>Opephora mutabilis</i> (Grunow) Sabbe & Vijverman                         | 79  | 118 | 21.54 | 32 | 7.832  | MB  | XL  | Attached colony   | Attached | Ribbon | Pad    | Low    | 13  | 190   | 140    | 1.36 | 3.1  |
| <i>Parlibellus protracta</i> (Grunow) Witkowski, Lange-Bertalot & Metzeltin  | 165 | -   | -     | 11 | 0.134  | B   | XXL | Attached colony   | Motile   | Tube   | Tube   | High   | 24  | 671   | 894    | 0.75 | 3.2  |
| <i>Pauliella taeniata</i> (Grunow) Round & Basson                            | 6   | 31  | 0.61  | 15 | 0.261  | BM  | XL  | Floating colony   | Floating | Ribbon | None   | Medium | 21  | 574   | 898    | 0.64 | 2.8  |
| <i>Petrodictyon gemma</i> (Ehrenberg) D.G.Mann                               | 179 | 1   | 0.01  | -  | -      | MB  | L   | Motile solitary   | Motile   | None   | None   | Low    | 133 | 19607 | 118772 | 0.17 | 2.1  |
| <i>Petronis humerosa</i> (Brébisson) Stickle & D.G. Mann                     | 180 | -   | -     | 2  | 0.034  | B   | XL  | Motile solitary   | Motile   | None   | None   | Low    | 66  | 7181  | 32440  | 0.22 | 2.1  |
| <i>Pinnularia appendiculata</i> (C. A. Agardh) Cleve                         | 376 | -   | -     | 11 | 0.168  | FB  | XL  | Motile solitary   | Motile   | None   | None   | Low    | 21  | 362   | 323    | 1.12 | 4.3  |
| <i>Pinnularia divergentissima</i> var. <i>minor</i> Krammer                  | -   | -   | -     | 1  | 0.008  | FB  | M   | Motile solitary   | Motile   | None   | None   | Low    | 22  | 281   | 229    | 1.23 | 4.8  |
| <i>Pinnularia elegans</i> (W.Smith) Krammer                                  | 277 | 1   | 0.01  | -  | -      | MB  | L   | Motile solitary   | Motile   | None   | None   | Low    | 78  | 5697  | 19820  | 0.29 | 3.5  |
| <i>Pinnularia krockii</i> (Grunow) Hustedt                                   | -   | 6   | 0.10  | 2  | 0.034  | FB  | M   | Motile solitary   | Motile   | None   | None   | Low    | 26  | 452   | 491    | 0.92 | 4.3  |
| <i>Pinnularia microstauron</i> (Ehrenberg) Cleve                             | -   | 1   | 0.02  | 1  | 0.034  | FB  | M   | Motile solitary   | Motile   | None   | None   | Low    | 34  | 592   | 643    | 0.92 | 5.7  |
| <i>Placoneis placentula</i> (Ehrenberg) Mereschkowsky                        | 278 | -   | -     | 1  | 0.008  | FB  | L   | Motile solitary   | Motile   | None   | None   | Low    | 24  | 869   | 1512   | 0.57 | 2.2  |
| <i>Planothidium conspicuum</i> (Mayer) Morales                               | -   | -   | -     | 1  | 0.017  | B   | L   | Attached solitary | Creeping | None   | Adnate | Low    | 8   | 90    | 54     | 1.65 | 2.0  |
| <i>Planothidium delicatulum</i> (Kützing) Round & Bukhtiyarova               | 3   | 58  | 1.03  | 91 | 7.832  | FB  | L   | Attached solitary | Creeping | None   | Adnate | Low    | 14  | 213   | 159    | 1.34 | 2.3  |
| <i>Planothidium dispar</i> (Cleve) Witkowski, Lange-Bertalot & Metzeltin     | 102 | 1   | 0.02  | 3  | 0.050  | FB  | XXL | Attached solitary | Creeping | None   | Adnate | Low    | 23  | 538   | 652    | 0.83 | 2.6  |
| <i>Planothidium frequentissimum</i> (Lange-Bertalot) Round & Bukhtiyarova    | 304 | 11  | 0.12  | 10 | 0.529  | FB  | M   | Attached solitary | Creeping | None   | Adnate | Low    | 11  | 151   | 112    | 1.35 | 2.2  |
| <i>Planothidium hauckianum</i> (Grunow) Round & Bukhtiyarova                 | -   | 96  | 3.09  | 64 | 3.605  | FB  | XXL | Attached solitary | Creeping | None   | Adnate | Low    | 8   | 90    | 54     | 1.65 | 2.0  |
| <i>Planothidium lanceolatum</i> (Brébisson) Lange-Bertalot                   | -   | -   | -     | 2  | 0.076  | B   | L   | Attached solitary | Creeping | None   | Adnate | Low    | 23  | 522   | 756    | 0.69 | 2.8  |
| <i>Planothidium lemmermannii</i> (Hustedt) Morales                           | 305 | 52  | 1.12  | 17 | 0.521  | FB  | XL  | Attached solitary | Creeping | None   | Adnate | Low    | 10  | 116   | 62     | 1.87 | 2.6  |
| <i>Planothidium linkei</i> (Hustedt) Lange-Bertalot                          | 306 | -   | -     | 6  | 0.134  | FB  | M   | Attached solitary | Creeping | None   | Adnate | Low    | 27  | 680   | 820    | 0.83 | 3.0  |
| <i>Planothidium pericavum</i> (J.R.Carter) Lange-Bertalot                    | 404 | -   | -     | 8  | 0.193  | B   | L   | Attached solitary | Creeping | None   | Adnate | Low    | 17  | 270   | 237    | 1.14 | 2.9  |
| <i>Planothidium rostratum</i> (Østrup) Round & Bukhtiyarova                  | 311 | -   | -     | 2  | 0.017  | BM  | XL  | Attached solitary | Creeping | None   | Adnate | Low    | 14  | 191   | 138    | 1.38 | 2.9  |
| <i>Planothidium septentrionalis</i> (Østrup) Round & Bukhtiyarova            | 103 | 14  | 0.26  | 9  | 0.319  | FBM | XXL | Attached solitary | Creeping | None   | Adnate | Low    | 20  | 362   | 337    | 1.08 | 2.9  |
| <i>Pleurosigma elongatum</i> W. Smith                                        | 281 | 10  | 0.14  | -  | -      | FB  | M   | Motile solitary   | Motile   | None   | None   | Low    | 297 | 20751 | 75318  | 0.28 | 11.6 |
| <i>Pleurosigma salinarum</i> (Grunow) Grunow                                 | 283 | 9   | 0.19  | -  | -      | FBM | XXL | Motile solitary   | Motile   | None   | None   | Low    | 106 | 4361  | 8602   | 0.51 | 7.6  |
| <i>Proschkinia bulnheimii</i> (Grunow) Karayeva                              | -   | 40  | 1.98  | -  | -      | B   | M   | Motile solitary   | Motile   | None   | None   | Low    | 26  | 746   | 1025   | 0.73 | 3.2  |
| <i>Psammothidium bioretii</i> (Germain) Bukhtiyarova & Round                 | 202 | -   | -     | 2  | 0.017  | FB  | XL  | Attached solitary | Creeping | None   | Adnate | Low    | 16  | 363   | 419    | 0.87 | 2.0  |
| <i>Psammothidium oblongellum</i> (Østrup) Van de Vijver                      | 308 | -   | -     | 1  | 0.025  | BF  | L   | Attached solitary | Creeping | None   | Adnate | Low    | 14  | 235   | 193    | 1.22 | 2.1  |
| <i>Psammothidium punctulatum</i> (Simonsen) Bukhtiyarova & Round             | 309 | 21  | 0.34  | 34 | 1.311  | FB  | M   | Attached solitary | Creeping | None   | Adnate | Low    | 12  | 143   | 88     | 1.61 | 2.5  |
| <i>Psammothidium rossii</i> (Hustedt) L.Bukhtiyarova & Round                 | 310 | -   | -     | 3  | 0.168  | B   | M   | Attached solitary | Creeping | None   | Adnate | Low    | 12  | 167   | 120    | 1.38 | 2.1  |
| <i>Psammothidium sacculum</i> (Carter) Bukhtiyarova                          | -   | -   | -     | 1  | 0.008  | BF  | XXL | Attached solitary | Creeping | None   | Adnate | Low    | 12  | 167   | 120    | 1.38 | 2.1  |
| <i>Pseudofallacia tenera</i> (Hustedt) Liu, Kocielek & Wan                   | 242 | 2   | 0.03  | 8  | 0.126  | FB  | M   | Motile solitary   | Motile   | None   | None   | Low    | 11  | 190   | 154    | 1.23 | 2.2  |
| <i>Pseudopodosira westii</i> (W.Smith) Sheshukova-Poretzskaya & Glezer       | 153 | 3   | 0.03  | -  | -      | FB  | M   | Floating colony   | Floating | Chain  | None   | Medium | 10  | 340   | 442    | 0.77 | 1.0  |
| <i>Pseudostaurosira brevistriata</i> (Grunow) Williams & Round               | 479 | 74  | 1.86  | 34 | 4.445  | FB  | L   | Attached colony   | Attached | Ribbon | Pad    | Low    | 12  | 192   | 154    | 1.25 | 3.0  |
| <i>Pseudostaurosira brevistriata</i> var. <i>inflata</i> (Pantocsek) Hartley | 480 | -   | -     | 28 | 3.353  | FB  | M   | Attached colony   | Attached | Ribbon | Pad    | Low    | 14  | 213   | 157    | 1.36 | 3.5  |
| <i>Pseudostaurosira elliptica</i> (Schumann) Edlund, Morales & Spaulding     | 491 | 121 | 96.03 | 61 | 15.487 | BM  | XL  | Attached colony   | Attached | Ribbon | Pad    | Low    | 4   | 61    | 41     | 1.48 | 1.2  |
| <i>Pseudostaurosira perminuta</i> (Grunow) Sabbe & Vijverman                 | 481 | -   | -     | 34 | 5.261  | MB  | M   | Attached colony   | Attached | Ribbon | Pad    | Low    | 11  | 129   | 64     | 2.00 | 3.7  |
| <i>Pseudostaurosira robusta</i> (Fusey) D.M.Williams & Round                 | -   | -   | -     | 17 | 2.000  | B   | M   | Attached colony   | Attached | Ribbon | Pad    | Low    | 7   | 112   | 90     | 1.25 | 1.8  |
| <i>Pseudostaurosira subsalina</i> (Hustedt) Morales                          | -   | -   | -     | 12 | 4.555  | FB  | XL  | Attached colony   | Attached | Ribbon | Pad    | Low    | 4   | 61    | 41     | 1.48 | 1.2  |

|                                                                                    |     |     |       |     |        |     |     |                   |          |        |       |        |     |       |       |      |      |
|------------------------------------------------------------------------------------|-----|-----|-------|-----|--------|-----|-----|-------------------|----------|--------|-------|--------|-----|-------|-------|------|------|
| <i>Pseudostaurosira zeileri</i> (Héribaud-Joseph) Williams & Round                 | 482 | 116 | 29.40 | 66  | 16.790 | FB  | L   | Attached colony   | Attached | Ribbon | Pad   | Low    | 7   | 112   | 90    | 1.25 | 1.8  |
| <i>Pteroncola inane</i> (Giffen) Round                                             | 80  | -   | -     | 7   | 3.639  | FB  | M   | Attached colony   | Attached | Zigzag | Pad   | High   | 9   | 160   | 129   | 1.24 | 1.7  |
| <i>Reimeria sinuata</i> (Gregory) Kociolek & Stoermer                              | 388 | 2   | 0.02  | 2   | 0.025  | MB  | L   | Motile solitary   | Motile   | None   | None  | Low    | 17  | 241   | 180   | 1.34 | 4.1  |
| <i>Rhoicosphenia abbreviata</i> (C.A. Agardh) Lange-Bertalot                       | 81  | 121 | 47.02 | 116 | 53.622 | MB  | M   | Attached solitary | Attached | None   | Stalk | Medium | 24  | 545   | 698   | 0.78 | 3.9  |
| <i>Rhopalodia acuminata</i> Krammer                                                | 288 | -   | -     | 1   | 0.017  | FB  | L   | Motile solitary   | Motile   | None   | None  | Low    | 49  | 1833  | 3717  | 0.49 | 2.9  |
| <i>Rhopalodia brebissonii</i> Krammer                                              | 483 | -   | -     | 5   | 0.134  | FB  | XL  | Motile solitary   | Motile   | None   | None  | Low    | 25  | 764   | 1109  | 0.69 | 1.9  |
| <i>Rhopalodia gibba</i> (Ehrenberg) Otto Müller                                    | 82  | 41  | 1.07  | 13  | 0.286  | B   | M   | Motile solitary   | Motile   | None   | None  | Low    | 60  | 2618  | 6216  | 0.42 | 3.0  |
| <i>Rhopalodia gibba</i> var. <i>parallela</i> (Grunow) H. Peragallo & M. Peragallo | -   | 5   | 0.08  | -   | -      | FB  | M   | Motile solitary   | Motile   | None   | None  | Low    | 150 | 8813  | 24609 | 0.36 | 6.0  |
| <i>Sellaphora pupula</i> Kützing                                                   | 289 | 3   | 0.07  | 1   | 0.017  | FB  | M   | Motile solitary   | Motile   | None   | None  | Low    | 22  | 537   | 694   | 0.77 | 3.0  |
| <i>Sellaphora stroemii</i> (Hustedt) Kobayasi                                      | -   | -   | -     | 1   | 0.017  | MB  | M   | Motile solitary   | Motile   | None   | None  | Low    | 22  | 537   | 694   | 0.77 | 3.0  |
| <i>Skeletonema costatum</i> (Greville) Cleve                                       | 83  | 32  | 1.02  | 4   | 0.151  | FBM | XXL | Floating colony   | Floating | Chain  | None  | Medium | 10  | 333   | 459   | 0.73 | 1.4  |
| <i>Skeletonema subsalsum</i> (A. Cleve) Bethge                                     | 290 | -   | -     | 1   | 0.008  | FB  | L   | Floating colony   | Floating | Chain  | None  | Medium | 17  | 333   | 353   | 0.94 | 3.0  |
| <i>Stauroneis legumen</i> (Ehrenberg) Kützing                                      | -   | -   | -     | 2   | 0.025  | FB  | M   | Motile solitary   | Motile   | None   | None  | Low    | 28  | 568   | 720   | 0.79 | 4.0  |
| <i>Stauroneis phoenicenteron</i> (Nitzsch) Ehrenberg                               | 395 | -   | -     | 1   | 0.017  | B   | L   | Motile solitary   | Motile   | None   | None  | Low    | 122 | 11392 | 50275 | 0.23 | 4.2  |
| <i>Stauroneis simulans</i> (Donkin) Ross                                           | 187 | 1   | 0.02  | 11  | 0.748  | FB  | XXL | Motile solitary   | Motile   | None   | None  | Low    | 31  | 1209  | 2096  | 0.58 | 2.4  |
| <i>Stauroneis smithii</i> var. <i>karelica</i> Wislouch & Kolbe                    | -   | -   | -     | 1   | 0.008  | FB  | M   | Motile solitary   | Motile   | None   | None  | Low    | 23  | 450   | 550   | 0.82 | 3.4  |
| <i>Staurophora anuschkae</i> Witkowski                                             | -   | -   | -     | 4   | 0.185  | FB  | M   | Motile solitary   | Motile   | None   | None  | Low    | 31  | 1209  | 2096  | 0.58 | 2.4  |
| <i>Staurophora wislouchii</i> (Poretzky & Anisimova) D.G. Mann                     | 487 | -   | -     | 1   | 0.008  | FB  | XL  | Motile solitary   | Motile   | None   | None  | Low    | 40  | 1813  | 4637  | 0.39 | 2.9  |
| <i>Staurosira punctiformis</i> Witkowski, Metzeltin & Lange-Bertalot               | -   | -   | -     | 41  | 13.218 | FB  | L   | Attached colony   | Attached | Ribbon | Pad   | Low    | 4   | 61    | 41    | 1.48 | 1.2  |
| <i>Staurosira venter</i> (Ehrenberg) Kobayasi                                      | 490 | -   | -     | 10  | 1.479  | FB  | L   | Attached colony   | Attached | Ribbon | Pad   | Low    | 8   | 144   | 120   | 1.20 | 1.5  |
| <i>Staurosirella lapponica</i> (Grunow) Williams & Round                           | -   | -   | -     | 1   | 0.008  | FB  | M   | Attached colony   | Attached | Ribbon | Pad   | Low    | 7   | 112   | 90    | 1.25 | 1.8  |
| <i>Staurosirella leptostauron</i> (Ehrenberg) Williams & Round                     | -   | -   | -     | 1   | 0.008  | FB  | M   | Attached colony   | Attached | Ribbon | Pad   | Low    | 15  | 312   | 403   | 0.77 | 1.9  |
| <i>Stephanodiscus hantzschii</i> Grunow                                            | 84  | 2   | 0.02  | 4   | 0.067  | BM  | XL  | Floating solitary | Floating | None   | None  | Low    | 11  | 346   | 454   | 0.76 | 1.0  |
| <i>Stephanodiscus minutulus</i> (Kützing) Cleve & Möller                           | 190 | 1   | 0.01  | -   | -      | FB  | M   | Floating solitary | Floating | None   | None  | Low    | 8   | 181   | 172   | 1.05 | 1.0  |
| <i>Stephanodiscus parvus</i> Stoermer & Håkansson                                  | 191 | -   | -     | 3   | 0.050  | BM  | L   | Floating solitary | Floating | None   | None  | Low    | 7   | 137   | 113   | 1.21 | 1.0  |
| <i>Surirella angustata</i> Hustedt                                                 | -   | -   | -     | 2   | 0.017  | FB  | M   | Motile solitary   | Motile   | None   | None  | Low    | 50  | 1740  | 3780  | 0.46 | 4.2  |
| <i>Surirella brebissonii</i> Krammer & Lange-Bertalot                              | 86  | 56  | 1.39  | 69  | 2.454  | BF  | XL  | Motile solitary   | Motile   | None   | None  | Low    | 28  | 977   | 1451  | 0.67 | 1.7  |
| <i>Surirella brightwellii</i> var. <i>baltica</i> (Schumann) Krammer               | 493 | -   | -     | 9   | 0.109  | BF  | XXL | Motile solitary   | Motile   | None   | None  | Low    | 34  | 1421  | 2393  | 0.59 | 1.8  |
| <i>Surirella minuta</i> Brébisson                                                  | 87  | -   | -     | 1   | 0.008  | FB  | M   | Motile solitary   | Motile   | None   | None  | Low    | 47  | 871   | 758   | 1.15 | 5.7  |
| <i>Surirella ovalis</i> Brébisson                                                  | -   | -   | -     | 1   | 0.042  | FB  | M   | Motile solitary   | Motile   | None   | None  | Low    | 47  | 871   | 758   | 1.15 | 5.7  |
| <i>Synedra acus</i> Kützing                                                        | 294 | 2   | 0.02  | 9   | 0.261  | FB  | M   | Attached colony   | Attached | Bush   | Pad   | Medium | 150 | 1617  | 910   | 1.78 | 42.9 |
| <i>Synedra ulna</i> (Nitzsch) Ehrenberg                                            | 295 | -   | -     | 6   | 0.202  | FB  | M   | Attached colony   | Attached | Bush   | Pad   | Medium | 218 | 4021  | 4133  | 0.97 | 41.1 |
| <i>Tabellaria fenestrata</i> (Lyngbye) Kützing                                     | 192 | 2   | 0.02  | 1   | 0.017  | B   | XXL | Attached colony   | Attached | Bush   | Pad   | Medium | 59  | 1912  | 2390  | 0.80 | 6.6  |
| <i>Tabellaria flocculosa</i> (Roth) Kützing                                        | 193 | 3   | 0.03  | 6   | 0.067  | MB  | XXL | Attached colony   | Attached | Bush   | Pad   | Medium | 36  | 2902  | 5054  | 0.57 | 1.4  |
| <i>Tabularia fasciculata</i> (C.A. Agardh) Williams & Round                        | 89  | 120 | 24.43 | 87  | 55.613 | FB  | M   | Attached colony   | Attached | Bush   | Pad   | Medium | 61  | 1093  | 1104  | 0.99 | 11.6 |
| <i>Tabularia ktenooides</i> Kuylenstierna                                          | 91  | -   | -     | 3   | 0.084  | MB  | XXL | Attached colony   | Attached | Bush   | Pad   | Medium | 21  | 415   | 459   | 0.91 | 3.7  |
| <i>Tabularia laevis</i> Kützing                                                    | -   | -   | -     | 34  | 1.782  | MB  | M   | Attached colony   | Attached | Bush   | Pad   | Medium | 61  | 873   | 696   | 1.25 | 13.6 |
| <i>Tabularia tabulata</i> (C.A. Agardh) Snoeijs                                    | 92  | 70  | 5.61  | 44  | 0.908  | MB  | XL  | Attached colony   | Attached | Bush   | Pad   | Medium | 273 | 7586  | 11967 | 0.63 | 35.0 |
| <i>Tabularia waernii</i> Snoeijs                                                   | 93  | 1   | 0.01  | 51  | 8.966  | BM  | XL  | Attached colony   | Attached | Bush   | Pad   | Medium | 26  | 241   | 129   | 1.87 | 8.8  |
| <i>Tetracyclus glans</i> (Ehrenberg) Mills                                         | -   | -   | -     | 1   | 0.008  | FB  | M   | Attached colony   | Attached | Zigzag | Pad   | High   | 50  | 2767  | 9610  | 0.29 | 2.3  |

|                                                                        |     |    |      |    |       |    |     |                 |          |       |      |        |     |       |        |      |      |
|------------------------------------------------------------------------|-----|----|------|----|-------|----|-----|-----------------|----------|-------|------|--------|-----|-------|--------|------|------|
| <i>Thalassiosira baltica</i> (Grunow) Ostenfeld                        | 95  | 49 | 0.72 | 25 | 0.345 | BF | XL  | Floating colony | Floating | Chain | None | Medium | 55  | 9637  | 66737  | 0.14 | 1.0  |
| <i>Thalassiosira hyperborea</i> var. <i>lacunosa</i> (Berg) Hasle      | 195 | -  | -    | 9  | 0.092 | MB | M   | Floating colony | Floating | Chain | None | Medium | 25  | 1994  | 6281   | 0.32 | 1.0  |
| <i>Thalassiosira levanderi</i> Van Goor                                | 98  | 35 | 0.65 | 49 | 1.824 | B  | M   | Floating colony | Floating | Chain | None | Medium | 10  | 327   | 417    | 0.78 | 1.0  |
| <i>Thalassiosira proschkinae</i> Makarova                              | 99  | 32 | 1.54 | 5  | 0.109 | B  | XXL | Floating colony | Floating | Chain | None | Medium | 5   | 92    | 62     | 1.48 | 1.0  |
| <i>Thalassiosira pseudonana</i> Hasle & Heimdal                        | 100 | 45 | 0.74 | 3  | 0.042 | MB | XXL | Floating colony | Floating | Chain | None | Medium | 7   | 145   | 123    | 1.18 | 1.0  |
| <i>Thalassiosira punctigera</i> (Castracane) Hasle                     | 495 | -  | -    | 1  | 0.017 | MB | XL  | Floating colony | Floating | Chain | None | Medium | 50  | 7850  | 49063  | 0.16 | 1.0  |
| <i>Tropidoneis dannfeltii</i> Cleve-Euler                              | -   | 1  | 0.02 | -  | -     | B  | M   | Motile solitary | Motile   | None  | None | Low    | 159 | 23596 | 158936 | 0.15 | 3.8  |
| <i>Tryblionella angustata</i> W. Smith                                 | -   | 1  | 0.02 | 5  | 0.067 | FB | M   | Motile solitary | Motile   | None  | None | Low    | 63  | 1178  | 1386   | 0.85 | 9.6  |
| <i>Tryblionella apiculata</i> Gregory                                  | 196 | 26 | 0.45 | 13 | 0.235 | B  | XL  | Motile solitary | Motile   | None  | None | Low    | 38  | 858   | 993    | 0.86 | 5.8  |
| <i>Tryblionella ardua</i> (Cholnoky) D.G. Mann                         | 461 | 7  | 0.12 | 3  | 0.076 | B  | L   | Motile solitary | Motile   | None  | None | Low    | 23  | 315   | 243    | 1.29 | 5.5  |
| <i>Tryblionella hungarica</i> (Grunow) Frenguelli                      | 298 | 1  | 0.01 | 2  | 0.092 | FB | XL  | Motile solitary | Motile   | None  | None | Low    | 43  | 856   | 885    | 0.97 | 7.8  |
| <i>Tryblionella levidensis</i> W. Smith                                | 198 | 9  | 0.15 | 2  | 0.017 | B  | L   | Motile solitary | Motile   | None  | None | Low    | 46  | 2793  | 8015   | 0.35 | 2.8  |
| <i>Tryblionella littoralis</i> var. <i>tergestina</i> (Grunow) Snoeijs | 497 | -  | -    | 1  | 0.017 | B  | M   | Motile solitary | Motile   | None  | None | Low    | 68  | 5358  | 18496  | 0.29 | 3.4  |
| <i>Tryblionella salinarum</i> (Grunow) Pelletan                        | 299 | -  | -    | 9  | 0.168 | BF | XL  | Motile solitary | Motile   | None  | None | Low    | 36  | 1145  | 1743   | 0.66 | 4.4  |
| <i>Tryblionella scalaris</i> (Ehrenberg) Siver & Hamilton              | 270 | -  | -    | 1  | 0.008 | FB | M   | Motile solitary | Motile   | None  | None | Low    | 653 | 62895 | 343482 | 0.18 | 24.8 |
