# Supplementary material for: Diatom Cell Size, Coloniality and Motility: Trade-Offs between Temperature, Salinity and Nutrient Supply with Climate Change
Source: PubMed Central journal article supplement (PMC4184900; doi:10.1371/journal.pone.0109993), 2014-10-03
Supplement: pone.0109993.s007.pdf [file pone.0109993.s007.pdf]

Table S7. Result from the autocorrelation analyses in the temperature and salinity gradients, showing the P-values from the RDA analysis using eigenvectors describing positive spatial and temporal autocorrelation.

| Spatial autocorrelation within dates<br>Temperature gradient |         | Temporal autocorrelation within sites<br>Temperature gradient |         | Spatial autocorrelation within areas<br>Salinity gradient |         |
|--------------------------------------------------------------|---------|---------------------------------------------------------------|---------|-----------------------------------------------------------|---------|
| Sampling date                                                | P-value | Sampling site                                                 | P-value | Sampling area                                             | P-value |
| 840502                                                       | 0.42    | A                                                             | 0.015   | Hal                                                       | 0.32    |
| 840523                                                       | 0.71    | B                                                             | 0.075   | Kal                                                       | 0.29    |
| 840612                                                       | 0.29    | C                                                             | 0.010   | Kvä                                                       | 0.82    |
| 840703                                                       | 0.33    | D                                                             | 0.005   | Him                                                       | 0.13    |
| 840724                                                       | 0.41    | E                                                             | 0.005   | Grä                                                       | 0.38    |
| 840814                                                       | 0.94    | F                                                             | 0.047   | Gäv                                                       | 0.67    |
| 840906                                                       | 0.60    | G                                                             | 0.005   | Hor                                                       | 0.69    |
| 840926                                                       | 0.68    | H                                                             | 0.105   | Omn                                                       | 0.13    |
| 841016                                                       | 0.64    | I                                                             | 0.005   | Hol                                                       | 0.15    |
| 841106                                                       | 0.61    | J                                                             | 0.015   | Ske                                                       | 0.22    |
| 841127                                                       | 0.37    | K                                                             | 0.005   | Rån                                                       | 0.02    |
