# Supplementary material for: Diatom Cell Size, Coloniality and Motility: Trade-Offs between Temperature, Salinity and Nutrient Supply with Climate Change
Source: PubMed Central journal article supplement (PMC4184900; doi:10.1371/journal.pone.0109993), 2014-10-03
Supplement: pone.0109993.s008.pdf [file pone.0109993.s008.pdf]

Table S8. Correlations between cell size and shape traits in the temperature gradient. The lower triangle shows Spearman rank correlation coefficients, the upper triangle shows the adjusted P-values using Holm's method.

|         | Length | Surface | Volume  | S:V     | Shape   |
|---------|--------|---------|---------|---------|---------|
| Length  |        | <0.0001 | <0.0001 | <0.0001 | <0.0001 |
| Surface | 0.90   |         | <0.0001 | <0.0001 | 0.054   |
| Volume  | 0.83   | 0.98    |         | <0.0001 | 0.726   |
| S:V     | -0.62  | -0.87   | -0.94   |         | 0.002   |
| Shape   | 0.51   | 0.15    | 0.02    | 0.23    |         |
