# Supplementary material for: Diatom Cell Size, Coloniality and Motility: Trade-Offs between Temperature, Salinity and Nutrient Supply with Climate Change
Source: PubMed Central journal article supplement (PMC4184900; doi:10.1371/journal.pone.0109993), 2014-10-03
Supplement: pone.0109993.s009.pdf [file pone.0109993.s009.pdf]

Table S9. Correlations between cell size and shape traits in the salinity gradient. The lower triangle shows Spearman rank correlation coefficients, the upper triangle shows the adjusted P-values using Holm's method.

|         | Length | Surface | Volume  | S:V     | Shape   |
|---------|--------|---------|---------|---------|---------|
| Length  |        | <0.0001 | <0.0001 | <0.0001 | <0.0001 |
| Surface | 0.91   |         | <0.0001 | <0.0001 | 0.003   |
| Volume  | 0.85   | 0.99    |         | <0.0001 | 0.232   |
| S:V     | -0.66  | -0.89   | -0.95   |         | 0.003   |
| Shape   | 0.51   | 0.17    | 0.06    | 0.17    |         |
