# Supplementary material for: Diatom Cell Size, Coloniality and Motility: Trade-Offs between Temperature, Salinity and Nutrient Supply with Climate Change
Source: PubMed Central journal article supplement (PMC4184900; doi:10.1371/journal.pone.0109993), 2014-10-03
Supplement: pone.0109993.s010.pdf [file pone.0109993.s010.pdf]

Table S10. Correlations between the environmental and biotic variables in the temperature gradient. The lower triangle shows Spearman rank correlation coefficients, the upper triangle shows the adjusted P-values using Holm's method. Abbreviations cf. Figure 5.

|          | Temp  | Seastemp | Spatanom | PAR     | DIN     | DIP     | DSi     | N:P     | FLOW    | Richness | MPB   | Maccov | Fauna   |
|----------|-------|----------|----------|---------|---------|---------|---------|---------|---------|----------|-------|--------|---------|
| Temp     |       | <0.0001  | <0.0001  | <0.0001 | 0.035   | 0.190   | 1.000   | 0.082   | 0.211   | 0.110    | 1.000 | 1.000  | 0.036   |
| Seastemp | 0.74  |          | 1.000    | <0.0001 | 0.005   | 0.302   | 1.000   | 0.0026  | 1.000   | 0.007    | 1.000 | 1.000  | 1.000   |
| Spatanom | 0.56  | 0.00     |          | 1.000   | 1.000   | 1.000   | 1.000   | 1.000   | <0.0001 | 1.000    | 1.000 | 1.000  | 1.000   |
| PAR      | 0.43  | 0.55     | 0.00     |         | <0.0001 | <0.0001 | <0.0001 | <0.0001 | 1.000   | 1.000    | 1.000 | 1.000  | 1.000   |
| DIN      | -0.31 | -0.35    | 0.00     | -0.82   |         | <0.0001 | <0.0001 | <0.0001 | 1.000   | 1.000    | 1.000 | 1.000  | 1.000   |
| DIP      | -0.26 | -0.25    | 0.00     | -0.77   | 0.80    |         | <0.0001 | <0.0001 | 1.000   | 1.000    | 1.000 | 1.000  | 1.000   |
| DSi      | -0.21 | -0.14    | 0.00     | -0.77   | 0.83    | 0.80    |         | <0.0001 | 1.000   | 1.000    | 1.000 | 1.000  | 1.000   |
| N:P      | -0.29 | -0.36    | 0.00     | -0.71   | 0.95    | 0.57    | 0.71    |         | 1.000   | 1.000    | 1.000 | 1.000  | 1.000   |
| FLOW     | 0.26  | 0.00     | 0.45     | 0.00    | 0.00    | 0.00    | 0.00    | 0.00    |         | 0.668    | 1.000 | 1.000  | 1.000   |
| Richness | 0.28  | 0.34     | 0.05     | 0.09    | -0.03   | 0.00    | 0.09    | -0.04   | 0.22    |          | 1.000 | 0.223  | 1.000   |
| MPB      | 0.00  | -0.17    | 0.06     | -0.19   | 0.12    | 0.02    | 0.03    | 0.12    | 0.17    | -0.01    |       | 0.003  | 0.110   |
| Maccov   | 0.15  | -0.05    | 0.15     | -0.16   | 0.19    | 0.13    | 0.17    | 0.20    | 0.13    | -0.26    | 0.36  |        | <0.0001 |
| Fauna    | 0.31  | 0.16     | 0.15     | 0.10    | -0.06   | -0.11   | -0.09   | -0.01   | 0.02    | -0.09    | 0.28  | 0.65   |         |
