# Supplementary material for: Diatom Cell Size, Coloniality and Motility: Trade-Offs between Temperature, Salinity and Nutrient Supply with Climate Change
Source: PubMed Central journal article supplement (PMC4184900; doi:10.1371/journal.pone.0109993), 2014-10-03
Supplement: pone.0109993.s011.pdf [file pone.0109993.s011.pdf]

Table S11. Correlations between the environmental and biotic variables in the salinity gradient. The lower triangle shows Spearman rank correlation coefficients, the upper triangle shows the adjusted P-values using Holm's method. Abbreviations cf. Figure 6.

|          | Salinity | Temp    | DIN     | DIP   | DSi     | N:P     | EXP     | SAND   | BEACH   | Richness | ADW     | ADW%    |
|----------|----------|---------|---------|-------|---------|---------|---------|--------|---------|----------|---------|---------|
| Salinity |          | <0.0001 | <0.0001 | 0.009 | <0.0001 | <0.0001 | 1.000   | 0.158  | 0.029   | 0.002    | <0.0001 | <0.0001 |
| Temp     | 0.59     |         | <0.0001 | 1.000 | <0.0001 | 1.000   | <0.0001 | 0.0002 | <0.0001 | 1.000    | 0.001   | 1.000   |
| DIN      | -0.73    | -0.48   |         | 1.000 | <0.0001 | <0.0001 | 1.000   | 0.127  | 1.000   | 0.094    | <0.0001 | <0.0001 |
| DIP      | 0.33     | -0.08   | -0.14   |       | 1.000   | <0.0001 | 1.000   | 1.000  | 1.000   | 1.000    | 1.000   | 1.000   |
| DSi      | -0.89    | -0.65   | 0.72    | -0.14 |         | <0.0001 | 1.000   | 0.024  | 0.019   | 0.004    | <0.0001 | <0.0001 |
| N:P      | -0.61    | -0.17   | 0.63    | -0.83 | 0.48    |         | 1.000   | 1.000  | 1.000   | 0.049    | 0.015   | 0.014   |
| EXP      | -0.14    | -0.50   | 0.06    | -0.14 | 0.15    | 0.13    |         | 0.049  | <0.0001 | 0.005    | 1.000   | 0.152   |
| SAND     | 0.25     | 0.41    | -0.26   | 0.05  | -0.31   | -0.16   | -0.29   |        | <0.0001 | 0.163    | <0.0001 | 0.0003  |
| BEACH    | -0.30    | -0.44   | 0.18    | -0.08 | 0.31    | 0.16    | 0.53    | -0.46  |         | 1.000    | 1.000   | 0.557   |
| Richness | -0.36    | 0.11    | 0.27    | -0.16 | 0.35    | 0.29    | -0.34   | 0.25   | -0.09   |          | 1.000   | <0.0001 |
| ADW      | 0.46     | 0.38    | -0.46   | 0.12  | -0.47   | -0.32   | -0.06   | 0.44   | -0.17   | 0.03     |         | 1.000   |
| ADW%     | 0.49     | 0.07    | -0.42   | 0.12  | -0.45   | -0.32   | 0.25    | -0.40  | 0.21    | -0.60    | 0.13    |         |
